# Supplementary material for: Genomic characterization of Candida parapsilosis hospital isolates revealed the spread and persistence of a fluconazole-resistant cluster associated with increased erg11 copies
Source: Research Square preprint supplement (doi:10.21203/rs.3.rs-6270917/v1), 2025-06-02
Supplement: Supplementary file 1 [file 575275c7968551cf6376cce6.xlsx]

## Sheet: Table2
Table 2. Details of SNPs Identified through GWAS.
Drug	SNP	Mutaion type	Putative_impact	HGVS.c	HGVS.p	Gene_id	Gene	Annotation
	SNW_023503277.1_30338	upstream	MODIFIER	c.-3357C>A		CPAR2_600100		Ortholog(s) have mRNA binding activity, role in telomere maintenance and cytoplasm, nucleus localization
	SNW_023503278.1_1560502	synonymous	LOW	c.327C>T	p.Ile109Ile	CPAR2_107350
	SNW_023503278.1_550010	missense	MODERATE	c.227A>G	p.Gln76Arg	CPAR2_102380		Has domain(s) with predicted nucleic acid binding activity
	SNW_023503280.1_1483690	stop_gained	HIGH	c.4945G>T	p.Gly1649*	CPAR2_806430		Ortholog(s) have role in mitotic division septum assembly, protein localization to bud neck and cell division site, cytoplasm, division septum localization
	SNW_023503281.1_1627857	upstream	MODIFIER	c.-340T>G		CPAR2_207600
	SNW_023503281.1_1698421	upstream	MODIFIER	c.-4837G>T		CPAR2_207880		Ortholog(s) have protein tag activity and role in mitotic recombination-dependent replication fork processing, protein sumoylation, stalled replication fork localization to nuclear periphery, telomere maintenance
	SNW_023503281.1_1698432	upstream	MODIFIER	c.-4848C>A		CPAR2_207880		Ortholog(s) have protein tag activity and role in mitotic recombination-dependent replication fork processing, protein sumoylation, stalled replication fork localization to nuclear periphery, telomere maintenance
	SNW_023503281.1_2374745	upstream	MODIFIER	c.-92A>C		CPAR2_211150		Ortholog(s) have RNA polymerase I activity and role in nucleolar large rRNA transcription by RNA polymerase I, transcription by RNA polymerase I, transcription elongation by RNA polymerase I
	SNW_023503281.1_2374752	upstream	MODIFIER	c.-99A>C		CPAR2_211150		Ortholog(s) have RNA polymerase I activity and role in nucleolar large rRNA transcription by RNA polymerase I, transcription by RNA polymerase I, transcription elongation by RNA polymerase I
Flu	SNW_023503281.1_2637591	upstream	MODIFIER	c.-247A>T		CPAR2_212210	ALD5	Putative aldehyde dehydrogenase
	SNW_023503281.1_748745	missense	MODERATE	c.2065A>C	p.Ser689Arg	CPAR2_203680		Ortholog(s) have ubiquitin binding activity and role in actin cortical patch organization, endocytosis, endoplasmic reticulum unfolded protein response, positive regulation of cytokinesis, regulation of protein localization
	SNW_023503283.1_1070076	synonymous	LOW	c.1470G>A	p.Ser490Ser	CPAR2_404770	ALS3	Putative adhesin
	SNW_023503283.1_511022	upstream	MODIFIER	c.-4448A>C		CPAR2_402290		Ortholog(s) have gamma-glutamylcyclotransferase activity and role in glutathione catabolic process
	SNW_023503284.1_252223	upstream	MODIFIER	c.-4222G>A		CPAR2_701130		Has domain(s) with predicted phospholipase activity and role in phospholipid catabolic process
Fc	SNW_023503283.1_1068884	missense	MODERATE	c.278T>A	p.Val93Asp	CPAR2_404770	ALS3	Putative adhesin
	SNW_023503283.1_342413	synonymous	LOW	c.861G>T	p.Gly287Gly	CPAR2_401550		Has domain(s) with predicted hydrolase activity, metallocarboxypeptidase activity and role in nitrogen compound metabolic process
Casp	SNW_023503277.1_292706	missense	MODERATE	c.220A>G	p.Ile74Val	CPAR2_601100		Ortholog(s) have ribonuclease inhibitor activity, role in maturation of LSU-rRNA from tricistronic rRNA transcript (SSU-rRNA, 5.8S rRNA, LSU-rRNA), ribosomal large subunit biogenesis and nucleolus localization
	SNW_023503278.1_283642	missense	MODERATE	c.886G>T	p.Gly296Cys	CPAR2_101400		Ortholog(s) have G-protein beta-subunit binding, GTPase activity
	SNW_023503278.1_1215491	missense	MODERATE	c.1020A>T	p.Glu340Asp	CPAR2_105580		Has domain(s) with predicted hydrolase activity
	SNW_023503283.1_1068903	synonymous	LOW	c.297T>C	p.Ala99Ala	CPAR2_404770	ALS3	Putative adhesin
