# Supplementary material for: Genomic characterization of Candida parapsilosis hospital isolates revealed the spread and persistence of a fluconazole-resistant cluster associated with increased erg11 copies
Source: Research Square preprint supplement (doi:10.21203/rs.3.rs-6270917/v1), 2025-06-02
Supplement: Supplementary file 2 [file c7ef86b9273d46d80297e68e.xlsx]

## Sheet: TableS1- Metadata
Table S1: Metadata of the 51 Qatari C. parapsilosis isolates (MICs greater than breakpoints and ECV are highlighted).
Species	MTLa2	WGS Code	BioSample ID	Accession number	Date of isolation	Specimen type	AmB	Cas	Flu	5Fc	Itra	Posa	Vori	Anid	Mica	AST Method	Country of origin	COVID-19	Hospital	Genetic Cluster	Average sequencing depth
Candida parapsilosis	y	CPARA1	SAMN36720798	10BC150010749	13/06/2015	Blood	0.38	1.5	0.5	0.094	NA	0.032	0.032	NA	NA	Etest	Qatar	No	Hamad General hospital	III	63.2
Candida parapsilosis	y	CPARA2	SAMN36720799	10BC150015043	28/07/2015	Blood	0.25	0.5	1	<=0.06	0.12	0.12	0.06	1	0.5	YO	Pakistan	No	Hamad General hospital	I	56.8
Candida parapsilosis	y	CPARA3	SAMN36720800	10BC150016329	11/08/2015	Blood	0.5	1	16	0.12	0.5	0.5	0.25	1	0.5	YO	Pakistan	No	Hamad General hospital	I	41.8
Candida parapsilosis	y	CPARA4	SAMN36720801	10BC150022177	08/10/2015	Blood	0.38	1.5	3	0.125	NA	0.19	0.125	NA	NA	Etest	Qatar	No	Hamad General hospital	others	32.2
Candida parapsilosis	y	CPARA5	SAMN36720802	10BC150023265	17/10/2015	Blood	0.25	0.5	128	<=0.06	0.25	0.12	0.5	0.5	0.25	YO	Nepal	No	Hamad General hospital	I	46.7
Candida parapsilosis	y	CPARA6	SAMN36720803	10BC150024323	24/10/2015	Blood	1	6	0.75	0.023	0.064	0.047	0.064	NA	NA	Etest	India	No	Hamad General hospital	others	40.3
Candida parapsilosis	y	CPARA7	SAMN36720804	10BC150027712	17/11/2015	Blood	0.25	0.5	128	<=0.06	0.25	0.5	0.5	0.5	0.5	YO	Palestine	No	Hamad General hospital	I	32.5
Candida parapsilosis	y	CPARA8	SAMN36720805	10BC160005479	16/02/2016	Blood	0.25	0.5	16	<=0.06	0.25	0.25	0.25	1	0.5	YO	Egypt	No	Hamad General hospital	I	41.7
Candida parapsilosis	y	CPARA9	SAMN36720806	10BC160008868	16/03/2016	Blood	0.25	0.5	0.38	0.016	NA	NA	0.002	NA	NA	Etest	Pakistan	No	Hamad General hospital	others	28
Candida parapsilosis	y	CPARA12	SAMN36720807	10BC160034852	06/11/2016	Blood	<=0.25	0.5	<=1	<=1	NA	NA	<=0.12	NA	0.5	Vitek	India	No	Hamad General hospital	IV	52.9
Candida parapsilosis	y	CPARA16	SAMN36720808	10BC170031116	2017-09-06	Blood	0.25	1	32	<=0.06	0.5	0.5	0.5	1	0.5	YO	Qatar	No	Hamad General hospital	I	43.9
Candida parapsilosis	y	CPARA17	SAMN36720809	10FL180002768	2018-06-10	CSF	0.047	0.5	2	0.047	NA	NA	0.064	NA	NA	Etest	Qatar	No	Hamad General hospital	others	47
Candida parapsilosis	y	CPARA18	SAMN36720810	10FL180002778	2018-06-11	CSF	0.016	0.75	1	0.016	NA	NA	0.047	NA	NA	Etest	Srilanka	No	Hamad General hospital	others	41.4
Candida parapsilosis	y	CPARA19	SAMN36720811	10BC180031304	2018-08-11	Blood	0.5	1	128	<=0.06	0.5	1	1	1	1	YO	Philippines	No	Hamad General hospital	I	46.6
Candida parapsilosis	y	CPARA20	SAMN36720812	10BC180041584	20/10/2018	Blood	0.25	0.5	0.5	0.064	0.064	0.012	0.008	1	NA	Etest	India	No	Hamad General hospital	III	55
Candida parapsilosis	y	CPARA21	SAMN36720813	10BC190004662	26/01/2019	Blood	0.25	0.5	0.25	0.012	0.125	0.032	0.008	0.5	NA	Etest	Nepal	No	Hamad General hospital	others	47.1
Candida parapsilosis	y	CPARA22	SAMN36720814	10BC190017293	2019-04-04	Blood	0.25	1	32	0.06	0.5	0.5	1	1	1	YO	Palestine	No	Hamad General hospital	I	47.8
Candida parapsilosis	y	CPARA23	SAMN36720815	10FL200000476	26/01/2020	Abdominal Fluid	0.25	0.5	4	0.06	0.12	0.06	0.06	2	4	YO	Pakistan	No	Hamad General hospital	V	61.8
Candida parapsilosis	y	CPARA24	SAMN36720816	10BC200005975	2020-02-01	Blood	0.5	0.5	0.12	1	0.06	0.03	0.008	0.5	0.5	YO	Syria	No	Hamad General hospital	others	39.5
Candida parapsilosis	y	CPARA25	SAMN36720817	10BC190040850	19/08/2019	Blood	0.12	0.5	0.5	0.06	0.12	0.06	0.015	1	2	YO	Qatar	No	Hamad General hospital	II	37
Candida parapsilosis	y	CPARA26	SAMN36720818	24BC200022205	17/05/2020	Blood	0.5	0.5	0.5	0.06	0.06	0.03	0.008	1	1	YO	India	Yes	Hazm Meberik hospital	IV	97.4
Candida parapsilosis	y	CPARA27	SAMN36720819	10BC200022533	19/05/2020	Blood	0.25	0.5	32	0.06	0.25	0.25	0.5	0.5	0.5	YO	Qatar	No	Hamad General hospital	I	89.6
Candida parapsilosis	y	CPARA28	SAMN36720820	10FL200002457	2020-06-07	Abdominal Fluid	0.5	0.5	0.5	0.06	0.06	0.03	0.008	1	1	YO	Palestine	Yes	Hamad General hospital	IV	94.1
Candida parapsilosis	y	CPARA29	SAMN36720821	24BC200025949	2020-06-09	Blood	0.5	0.5	0.25	0.06	0.06	0.015	0.008	1	1	YO	Pakistan	Yes	Hazm Meberik hospital	IV	100.3
Candida parapsilosis	y	CPARA30	SAMN36720822	10FL200002630	18/06/2020	CSF	0.5	0.5	0.5	0.12	0.12	0.06	0.015	1	1	YO	Pakistan	No	Hamad General hospital	III	91.5
Candida parapsilosis	y	CPARA31	SAMN36720823	24BC200028769	25/06/2020	Blood	0.5	0.5	0.5	0.06	0.06	0.06	0.015	1	1	YO	India	Yes	Hazm Meberik hospital	II	102.7
Candida parapsilosis	y	CPARA32	SAMN36720824	24BC200031207	2020-07-11	Blood	0.5	0.5	0.5	0.5	0.06	0.03	0.008	0.5	1	YO	Indonesia	Yes	Hazm Meberik hospital	IV	88.1
Candida parapsilosis	y	CPARA33	SAMN36720825	10BC200032204	18/07/2020	Blood	0.12	0.5	4	0.06	0.03	0.06	0.06	0.5	0.5	YO	Philippine	Yes	Hamad General hospital	I	97.6
Candida parapsilosis	y	CPARA34	SAMN36720826	10BC200032111	17/07/2020	Blood	0.5	0.5	32	0.06	0.25	0.25	0.5	0.5	0.5	YO	Nepal	Yes	Hamad General hospital	I	95.5
Candida parapsilosis	y	CPCORTH8	SAMN36720827	10BC160029029A	21/09/2016	Blood	<0.25	<0.25	<1	<1	NA	NA	<0.12	NA	<0.12	Vitek	Qatar	No	Hamad General hospital	others	43.6
Candida parapsilosis	y	cvcan6	SAMN36720830	24BC210029151	2021-06-16	Blood	0.25	0.12	0.25	0.06	0.06	0.015	0.008	1	0.5	YO	Ghana	Yes	Hazm Meberik hospital	others	78
Candida parapsilosis	y	cvcan7	SAMN36720831	10BC210018669	04/22/2021	Blood	0.25	0.25	0.5	0.12	0.12	0.03	0.015	1	0.5	YO	Srilanka	Yes	Hamad General hospital	III	95.1
Candida parapsilosis	y	cvcan8	SAMN36720832	24BC210025678	2021-05-24	Blood	≤0.25	0.25	32	≤1	NA	NA	1	NA	0.5	Vitek	Nepal	Yes	Hamad General hospital	I	47.1
Candida parapsilosis	y	cvcan9	SAMN36720833	24BC200028769	2020-06-29	Blood	0.5	0.5	0.5	0.06	0.06	0.06	0.015	1	1	YO	India	Yes	Hamad General hospital	II	90.4
Candida parapsilosis	y	cvcan10	SAMN36720834	10BC210010387	2021-03-19	Blood	0.25	0.5	64	0.06	0.5	0.5	1	1	1	YO	Pakistan	Yes	Hamad General hospital	I	82.5
Candida parapsilosis	y	cvcan17	SAMN36720835	10BC200051626	2020-12-18	Blood	0.5	0.015	32	0.06	0.5	0.5	0.5	1	1	YO	Egypt	No	Hamad General hospital	I	71.3
Candida parapsilosis	y	cvcan19	SAMN36720836	10BC200046657	2020-11-11	Blood	0.25	0.5	32	0.06	0.25	0.25	0.5	1	1	YO	Qatar	No	Hamad General hospital	I	84
Candida parapsilosis	y	cvcan26	SAMN36720837	14BC210006566	2021-01-24	Blood	0.5	0.5	32	0.06	0.5	0.5	1	1	1	YO	Qatar	No	Rhumailah long term facility	I	93
Candida parapsilosis	y	cvcan29	SAMN36720838	24BC200028769	2020-06-29	Blood	0.5	0.5	0.5	0.06	0.06	0.06	0.015	1	1	YO	India	Yes	Hazm Meberik hospital	II	90.1
Candida parapsilosis	y	cvcan31	SAMN36720839	10BC200021142	2020-05-15	Blood	0.25	0.25	0.25	0.06	0.03	0.015	0.008	1	0.5	YO	Bangladish	No	Hamad General hospital	III	92.4
Candida parapsilosis	y	cvcan33	SAMN36720840	10BC200032204	2020-07-22	Blood	0.12	0.5	4	0.06	0.03	0.06	0.06	0.5	0.5	YO	Philippine	Yes	Hamad General hospital	I	86.3
Candida parapsilosis	y	cvcan37	SAMN36720841	24BC210015220	2021-04-08	Blood	0.25	0.5	0.5	0.12	0.06	0.03	0.015	1	1	YO	India	Yes	Hazm Meberik hospital	II	90.2
Candida parapsilosis	y	cvcan39	SAMN36720842	10BC210009463	2021-03-13	Blood	0.25	0.25	0.5	0.12	0.06	0.015	0.015	2	1	YO	Egypt	No	Hamad General hospital	III	89.8
Candida parapsilosis	y	cvcan41	SAMN36720843	13BC210043471B	2021-05-10	Blood	0.5	1	32	≤1	NA	NA	0.5	NA	0.5	Vitek	UAE	No	National Center for Cancer Care and Research	I	75.6
Candida parapsilosis	y	cvcan52	SAMN36720845	10BC220020468	21/05/2022	Blood	0.5	0.5	0.5	0.12	0.03	0.015	0.015	1	2	YO	Qatar	No	Hamad General hospital	II	65.3
Candida parapsilosis	y	cvcan55	SAMN36720847	11BC220005702	26/01/2022	Blood	0.5	0.5	32	0.12	0.25	0.25	1	1	1	YO	Qatar	No	Heart Hospital	I	62
Candida parapsilosis	y	cvcan61	SAMN36720849	1BC20220004997	17/09/2022	Blood	0.5	0.5	< 0.5	<1	NA	NA	< 0.12	NA	2	Vitek	Qatar	No	Sidra Medicine	V	56.3
Candida parapsilosis	y	cvcan62	SAMN36720850	1BC20220004694	02/09/2022	Blood	< 0.25	0.5	1	< 1	NA	NA	< 0.12	NA	0.5	Vitek	Qatar	No	Sidra Medicine	V	79
Candida parapsilosis	y	CG15	SAMN36720851	10BC180001095	08/01/2018	Blood	1	0.5	128	0.12	0.5	0.5	2	0.5	2	YO	NA	No	Hamad General hospital	I	159.9
Candida parapsilosis	y	CG16	SAMN36720852	10BC180002782	29/01/2018	Blood	0.5	0.25	32	0.06	0.25	0.5	0.5	0.5	1	YO	NA	No	Hamad General hospital	I	181.1
Candida parapsilosis	y	SCG5	SAMN36720853	1BC1902946	16/07/2019	Blood	0.75	0.5	0.5	<=1	NA	NA	0.012	NA	2	Vitek	NA	No	Sidra Medicine	II	175.9

## Sheet: TableS2-pairwise-distance
Table S2. Pairwise genetic distance (including heterozygous sites) among 51 Qatari Candida parapsilosis isolates using CDC317 as reference
	cvcan6	CPARA21	CPARA17	CPARA24	cvcan61	cvcan62	CPARA23	CPCORTH8	CPARA9	CPARA29	CPARA12	CPARA26	CPARA32	CPARA28	CPARA20	CPARA1	CPARA30	cvcan7	cvcan39	cvcan31	CPARA25	cvcan52	cvcan37	SCG5N	cvcan29	cvcan9	CPARA31	CPARA4	CPARA18	cvcan26	CPARA16	CPARA34	cvcan41	cvcan17	cvcan55	CPARA7	CPARA22	cvcan33	CPARA33	cvcan19	CPARA19	cvcan10	CPARA27	cvcan8	CPARA2	CPARA8	CPARA5	CG15	CPARA3
cvcan6	0	3084	2998	25366	5633	5644	6315	5758	6059	4750	5624	4742	4912	4820	5817	5529	5116	4903	5232	5306	5875	5454	5569	5590	5049	5501	5317	6577	6138	5171	6367	5346	5514	5668	5664	5976	6092	5623	5414	5271	6061	5625	5444	5539	6132	6001	5985	5898	6246
CPARA21	x	0	1041	25366	5972	5808	5558	5353	5812	5839	4775	5766	5996	5891	4921	4999	6110	5899	6336	6337	5541	6387	6594	6506	5892	6531	6301	5831	5198	5973	5372	6293	6472	6648	5418	5324	5279	6608	6408	6150	5199	6621	6386	6479	5203	5345	5218	6842	5285
CPARA17	x	x	0	25366	5928	5726	5456	5254	5770	5775	4626	5695	5952	5796	4794	4873	6045	5844	6268	6279	5451	6341	6553	6448	5841	6487	6253	5802	5163	5937	5340	6247	6430	6615	5320	5230	5178	6566	6373	6090	5104	6579	6349	6436	5057	5227	5084	6758	5211
CPARA24	x	x	x	0	25366	25366	25366	25366	25366	25366	25366	25366	25366	25366	25366	25366	25366	25366	25366	25366	25366	25366	25366	25366	25366	25366	25366	25366	25366	25366	25366	25366	25366	25366	25366	25366	25366	25366	25366	25366	25366	25366	25366	25366	25366	25366	25366	25366	25366
cvcan61	x	x	x	x	0	2767	3417	6120	6551	5597	6011	5613	5772	5625	6297	5982	5982	5821	6069	6088	6029	5883	6053	5994	5571	5999	5802	6636	6182	5600	6381	5784	5925	6070	5685	5991	6080	6041	5878	5716	6078	6062	5884	5936	6103	5985	5970	6303	6224
cvcan62	x	x	x	x	x	0	3164	5990	6490	5766	5865	5727	5904	5813	6057	5815	6120	5940	6236	6223	6015	6235	6410	6289	5811	6327	6139	6635	6049	5646	6175	5929	6081	6226	5524	5853	5890	6188	6020	5802	5842	6205	6019	6102	5904	5820	5774	6448	6007
CPARA23	x	x	x	x	x	x	0	6154	6598	6539	5560	6502	6713	6578	5853	5903	6918	6738	7046	7055	6203	6978	7158	7071	6538	7079	6903	6596	5897	6573	6152	6857	7035	7184	6037	6072	5960	7148	6963	6741	5907	7167	6978	7061	5860	5960	5851	7402	5968
CPCORTH8	x	x	x	x	x	x	x	0	1726	5728	5116	5643	5861	5760	5417	5347	6143	5931	6211	6317	5591	6142	6320	6189	5730	6260	6037	5983	5452	5616	5566	5885	6054	6200	5302	5344	5352	6191	6010	5796	5315	6217	6002	6083	5332	5288	5218	6457	5393
CPARA9	x	x	x	x	x	x	x	x	0	5896	5613	5833	5977	5953	5935	5909	6361	6216	6374	6499	5923	6287	6449	6318	5945	6367	6206	6225	5855	5880	5914	6076	6188	6305	5838	5717	5727	6275	6159	5982	5748	6332	6150	6205	5825	5641	5742	6538	5763
CPARA29	x	x	x	x	x	x	x	x	x	0	2690	1083	1020	972	5149	4809	3614	3697	3554	3663	5017	3823	3816	3878	3913	3773	3627	5703	5414	4081	5583	3851	3910	3981	4931	5193	5323	3945	3827	4032	5353	3968	3844	3957	5387	5218	5247	4249	5509
CPARA12	x	x	x	x	x	x	x	x	x	x	0	2601	2859	2706	4031	4081	5247	4969	5392	5423	4562	5466	5656	5609	4974	5596	5343	4956	4286	5072	4481	5392	5576	5726	4461	4461	4339	5696	5502	5273	4321	5744	5519	5585	4189	4431	4230	5985	4383
CPARA26	x	x	x	x	x	x	x	x	x	x	x	0	792	744	5102	4765	3769	3793	3755	3873	4907	3941	4027	4042	3930	3954	3760	5670	5329	4065	5474	3930	4031	4119	4846	5068	5213	4096	3897	4015	5246	4109	3903	4078	5287	5115	5151	4369	5389
CPARA32	x	x	x	x	x	x	x	x	x	x	x	x	0	583	5297	4974	3734	3892	3591	3671	5128	3796	3810	3851	4046	3762	3702	5835	5545	4162	5675	3908	3880	3893	5009	5285	5394	3870	3787	4066	5444	3879	3821	3958	5479	5318	5333	4151	5591
CPARA28	x	x	x	x	x	x	x	x	x	x	x	x	x	0	5201	4845	3714	3822	3628	3729	5028	3810	3849	3905	3958	3828	3654	5746	5429	4139	5587	3897	3934	4002	4938	5201	5320	3982	3835	4056	5373	3989	3863	3989	5396	5227	5263	4258	5510
CPARA20	x	x	x	x	x	x	x	x	x	x	x	x	x	x	0	1982	3461	3295	3750	3752	4662	5607	5806	5712	5128	5747	5513	5175	4414	5123	4621	5422	5610	5781	4418	4489	4408	5766	5539	5302	4295	5766	5518	5628	4251	4456	4213	5976	4459
CPARA1	x	x	x	x	x	x	x	x	x	x	x	x	x	x	x	0	3189	3019	3477	3505	4576	5291	5468	5412	4801	5413	5166	5202	4521	4822	4712	5119	5310	5486	4284	4436	4424	5447	5223	4999	4362	5461	5226	5314	4331	4450	4254	5668	4548
CPARA30	x	x	x	x	x	x	x	x	x	x	x	x	x	x	x	x	0	1802	1666	1723	5346	4095	4139	4160	4246	4101	3978	5922	5633	4314	5760	4057	4110	4170	5110	5392	5492	4142	4033	4208	5503	4130	4000	4179	5566	5396	5445	4402	5672
cvcan7	x	x	x	x	x	x	x	x	x	x	x	x	x	x	x	x	x	0	1644	1707	5086	4239	4316	4352	4066	4242	4087	5700	5338	4136	5537	4118	4231	4354	4830	5156	5266	4319	4196	4186	5259	4347	4174	4296	5336	5166	5192	4616	5445
cvcan39	x	x	x	x	x	x	x	x	x	x	x	x	x	x	x	x	x	x	0	958	5367	3741	3705	3735	4216	3633	3846	6002	5698	4361	5844	4060	3888	3742	5203	5439	5567	3706	3881	4175	5608	3718	3907	3963	5669	5482	5540	3999	5743
cvcan31	x	x	x	x	x	x	x	x	x	x	x	x	x	x	x	x	x	x	x	0	5494	3848	3810	3802	4373	3770	3978	6118	5834	4437	5951	4143	3987	3816	5285	5547	5669	3790	3973	4271	5736	3801	4000	4060	5766	5572	5642	4091	5842
CPARA25	x	x	x	x	x	x	x	x	x	x	x	x	x	x	x	x	x	x	x	x	0	2264	2344	2455	1800	2359	2104	3727	3109	3287	3255	3538	3728	3870	2973	2964	3045	3804	3600	3394	3031	3823	3613	3728	3042	2987	2935	4056	3087
cvcan52	x	x	x	x	x	x	x	x	x	x	x	x	x	x	x	x	x	x	x	x	x	0	713	743	1124	663	813	4389	4054	2751	4239	2513	2384	2268	3604	3807	3956	2210	2316	2618	3969	2260	2372	2431	4043	3814	3903	2487	4077
cvcan37	x	x	x	x	x	x	x	x	x	x	x	x	x	x	x	x	x	x	x	x	x	x	0	768	1168	528	743	4571	4222	2829	4370	2497	2348	2164	3725	3981	4107	2134	2327	2688	4150	2158	2367	2410	4206	3951	4054	2449	4218
SCG5N	x	x	x	x	x	x	x	x	x	x	x	x	x	x	x	x	x	x	x	x	x	x	x	0	1305	649	903	4484	4187	2886	4349	2562	2401	2219	3718	3899	4067	2181	2380	2704	4097	2190	2420	2394	4183	3909	4015	2335	4171
cvcan29	x	x	x	x	x	x	x	x	x	x	x	x	x	x	x	x	x	x	x	x	x	x	x	x	0	819	640	3929	3513	2366	3714	2523	2635	2769	3054	3329	3434	2725	2541	2383	3454	2738	2565	2684	3487	3283	3368	3005	3559
cvcan9	x	x	x	x	x	x	x	x	x	x	x	x	x	x	x	x	x	x	x	x	x	x	x	x	x	0	432	4494	4134	2777	4299	2463	2301	2119	3668	3887	4032	2053	2259	2618	4082	2125	2331	2362	4141	3887	4003	2398	4145
CPARA31	x	x	x	x	x	x	x	x	x	x	x	x	x	x	x	x	x	x	x	x	x	x	x	x	x	x	0	4276	3898	2565	4066	2260	2316	2361	3403	3669	3801	2315	2184	2468	3840	2347	2222	2377	3878	3640	3718	2635	3921
CPARA4	x	x	x	x	x	x	x	x	x	x	x	x	x	x	x	x	x	x	x	x	x	x	x	x	x	x	x	0	2748	3317	2853	3567	3754	3925	2963	2795	2796	3883	3696	3432	2801	3894	3673	3779	2783	2775	2784	4080	2826
CPARA18	x	x	x	x	x	x	x	x	x	x	x	x	x	x	x	x	x	x	x	x	x	x	x	x	x	x	x	x	0	2862	2229	3181	3349	3536	2295	2187	2156	3508	3305	3044	2085	3519	3309	3379	2061	2129	2041	3749	2088
cvcan26	x	x	x	x	x	x	x	x	x	x	x	x	x	x	x	x	x	x	x	x	x	x	x	x	x	x	x	x	x	0	1826	661	812	955	1186	1505	1628	1022	852	659	1674	1020	824	957	1661	1505	1499	1334	1818
CPARA16	x	x	x	x	x	x	x	x	x	x	x	x	x	x	x	x	x	x	x	x	x	x	x	x	x	x	x	x	x	x	0	2161	2334	2519	1321	1158	1134	2573	2360	2081	1171	2569	2319	2443	1042	1169	1065	2787	1158
CPARA34	x	x	x	x	x	x	x	x	x	x	x	x	x	x	x	x	x	x	x	x	x	x	x	x	x	x	x	x	x	x	x	0	439	533	1421	1682	1901	633	486	621	1970	639	478	670	1942	1762	1736	982	2044
cvcan41	x	x	x	x	x	x	x	x	x	x	x	x	x	x	x	x	x	x	x	x	x	x	x	x	x	x	x	x	x	x	x	x	0	367	1652	1890	2077	501	512	685	2169	504	511	590	2146	1943	1949	843	2224
cvcan17	x	x	x	x	x	x	x	x	x	x	x	x	x	x	x	x	x	x	x	x	x	x	x	x	x	x	x	x	x	x	x	x	x	0	1802	2056	2270	315	536	835	2369	327	550	587	2337	2143	2138	666	2429
cvcan55	x	x	x	x	x	x	x	x	x	x	x	x	x	x	x	x	x	x	x	x	x	x	x	x	x	x	x	x	x	x	x	x	x	x	0	950	1057	1918	1687	1408	992	1905	1648	1778	963	1024	751	2143	1213
CPARA7	x	x	x	x	x	x	x	x	x	x	x	x	x	x	x	x	x	x	x	x	x	x	x	x	x	x	x	x	x	x	x	x	x	x	x	0	953	2122	1924	1649	1003	2133	1887	2013	949	949	810	2322	1053
CPARA22	x	x	x	x	x	x	x	x	x	x	x	x	x	x	x	x	x	x	x	x	x	x	x	x	x	x	x	x	x	x	x	x	x	x	x	x	0	2299	2074	1753	869	2266	2028	2133	762	945	843	2453	944
cvcan33	x	x	x	x	x	x	x	x	x	x	x	x	x	x	x	x	x	x	x	x	x	x	x	x	x	x	x	x	x	x	x	x	x	x	x	x	x	0	355	858	2376	350	593	645	2359	2166	2224	671	2440
CPARA33	x	x	x	x	x	x	x	x	x	x	x	x	x	x	x	x	x	x	x	x	x	x	x	x	x	x	x	x	x	x	x	x	x	x	x	x	x	x	0	719	2151	546	474	661	2144	1953	1983	872	2233
cvcan19	x	x	x	x	x	x	x	x	x	x	x	x	x	x	x	x	x	x	x	x	x	x	x	x	x	x	x	x	x	x	x	x	x	x	x	x	x	x	x	0	1735	681	513	722	1829	1656	1734	1012	1935
CPARA19	x	x	x	x	x	x	x	x	x	x	x	x	x	x	x	x	x	x	x	x	x	x	x	x	x	x	x	x	x	x	x	x	x	x	x	x	x	x	x	x	0	2219	1977	2099	786	998	772	2363	1035
cvcan10	x	x	x	x	x	x	x	x	x	x	x	x	x	x	x	x	x	x	x	x	x	x	x	x	x	x	x	x	x	x	x	x	x	x	x	x	x	x	x	x	x	0	384	481	2329	2151	2221	499	2431
CPARA27	x	x	x	x	x	x	x	x	x	x	x	x	x	x	x	x	x	x	x	x	x	x	x	x	x	x	x	x	x	x	x	x	x	x	x	x	x	x	x	x	x	x	0	509	2099	1902	1963	736	2188
cvcan8	x	x	x	x	x	x	x	x	x	x	x	x	x	x	x	x	x	x	x	x	x	x	x	x	x	x	x	x	x	x	x	x	x	x	x	x	x	x	x	x	x	x	x	0	2218	2023	2088	736	2322
CPARA2	x	x	x	x	x	x	x	x	x	x	x	x	x	x	x	x	x	x	x	x	x	x	x	x	x	x	x	x	x	x	x	x	x	x	x	x	x	x	x	x	x	x	x	x	0	939	636	2543	889
CPARA8	x	x	x	x	x	x	x	x	x	x	x	x	x	x	x	x	x	x	x	x	x	x	x	x	x	x	x	x	x	x	x	x	x	x	x	x	x	x	x	x	x	x	x	x	x	0	870	2386	893
CPARA5	x	x	x	x	x	x	x	x	x	x	x	x	x	x	x	x	x	x	x	x	x	x	x	x	x	x	x	x	x	x	x	x	x	x	x	x	x	x	x	x	x	x	x	x	x	x	0	2421	949
CG15	x	x	x	x	x	x	x	x	x	x	x	x	x	x	x	x	x	x	x	x	x	x	x	x	x	x	x	x	x	x	x	x	x	x	x	x	x	x	x	x	x	x	x	x	x	x	x	0	2667
CPARA3	x	x	x	x	x	x	x	x	x	x	x	x	x	x	x	x	x	x	x	x	x	x	x	x	x	x	x	x	x	x	x	x	x	x	x	x	x	x	x	x	x	x	x	x	x	x	x	x	0
CG16	x	x	x	x	x	x	x	x	x	x	x	x	x	x	x	x	x	x	x	x	x	x	x	x	x	x	x	x	x	x	x	x	x	x	x	x	x	x	x	x	x	x	x	x	x	x	x	x	x
CPARA6	x	x	x	x	x	x	x	x	x	x	x	x	x	x	x	x	x	x	x	x	x	x	x	x	x	x	x	x	x	x	x	x	x	x	x	x	x	x	x	x	x	x	x	x	x	x	x	x	x
CDC317	x	x	x	x	x	x	x	x	x	x	x	x	x	x	x	x	x	x	x	x	x	x	x	x	x	x	x	x	x	x	x	x	x	x	x	x	x	x	x	x	x	x	x	x	x	x	x	x	x
[truncated: 3 more columns]

## Sheet: TableS3-TajimaD
Table S3. Raw data for the estimation of Tajima D.
CHROM	BIN_START	N_SNPS	TajimaD (only clade 1 isolates)			CHROM	BIN_START	N_SNPS	TajimaD (non Clade I isolates)			CHROM	BIN_START	N_SNPS	TajimaD (all isolates)
NW_023503284.1	0	2	-0.908022			NW_023503284.1	0	11	-0.56911			NW_023503284.1	0	12	-1.23255
NW_023503284.1	5000	1	-0.845192			NW_023503284.1	5000	22	-1.70669			NW_023503284.1	5000	23	-2.05665
NW_023503284.1	10000	1	-0.845192			NW_023503284.1	10000	5	-0.760263			NW_023503284.1	10000	5	-1.06703
NW_023503284.1	15000	1	-0.845192			NW_023503284.1	15000	5	-0.136387			NW_023503284.1	15000	6	-0.937731
NW_023503284.1	20000	2	-1.11882			NW_023503284.1	20000	8	-0.533518			NW_023503284.1	20000	9	-0.947248
NW_023503284.1	25000	1	-0.845192			NW_023503284.1	25000	13	-0.0350046			NW_023503284.1	25000	14	-0.928874
NW_023503284.1	30000	4	-1.41651			NW_023503284.1	30000	7	0.240506			NW_023503284.1	30000	8	-0.552659
NW_023503284.1	35000	1	0.84384			NW_023503284.1	35000	6	-1.54943			NW_023503284.1	35000	6	-1.34679
NW_023503284.1	40000	1	-0.845192			NW_023503284.1	40000	4	-0.999672			NW_023503284.1	40000	4	-1.16415
NW_023503284.1	45000	2	-1.30048			NW_023503284.1	45000	1	-0.52602			NW_023503284.1	45000	3	-1.37125
NW_023503284.1	50000	1	0.506034			NW_023503284.1	50000	3	-0.487399			NW_023503284.1	50000	3	-0.399468
NW_023503284.1	55000	2	-1.11882			NW_023503284.1	55000	6	-0.72639			NW_023503284.1	55000	6	-1.02851
NW_023503284.1	60000	4	-1.53151			NW_023503284.1	60000	5	0.219234			NW_023503284.1	60000	7	0.138554
NW_023503284.1	65000	1	-0.845192			NW_023503284.1	65000	1	-0.52602			NW_023503284.1	65000	2	-1.07418
NW_023503284.1	70000	1	-0.845192			NW_023503284.1	70000	5	-0.850091			NW_023503284.1	70000	6	-1.34603
NW_023503284.1	75000	2	-1.11882			NW_023503284.1	75000	7	-1.06			NW_023503284.1	75000	8	-1.45801
NW_023503284.1	80000	0	nan			NW_023503284.1	80000	1	-0.8912			NW_023503284.1	80000	1	-0.911574
NW_023503284.1	85000	2	-1.11882			NW_023503284.1	85000	14	-2.29699			NW_023503284.1	85000	16	-2.36662
NW_023503284.1	90000	2	-1.30048			NW_023503284.1	90000	3	-1.18965			NW_023503284.1	90000	5	-1.65419
NW_023503284.1	95000	3	-1.28467			NW_023503284.1	95000	9	-0.121409			NW_023503284.1	95000	12	-1.16005
NW_023503284.1	100000	3	-1.29256			NW_023503284.1	100000	9	-0.533753			NW_023503284.1	100000	10	-0.741154
NW_023503284.1	105000	1	-0.338482			NW_023503284.1	105000	6	-1.48794			NW_023503284.1	105000	6	-1.50386
NW_023503284.1	110000	3	-1.29256			NW_023503284.1	110000	4	1.67611			NW_023503284.1	110000	5	0.594663
NW_023503284.1	115000	1	-0.845192			NW_023503284.1	115000	8	-1.0406			NW_023503284.1	115000	8	-0.847937
NW_023503284.1	120000	1	-0.845192			NW_023503284.1	120000	6	-1.35634			NW_023503284.1	120000	6	-0.697043
NW_023503284.1	125000	0	nan			NW_023503284.1	125000	8	-1.28998			NW_023503284.1	125000	8	-1.58644
NW_023503284.1	130000	1	-0.845192			NW_023503284.1	130000	3	-0.457776			NW_023503284.1	130000	4	-1.06295
NW_023503284.1	135000	19	-2.55887			NW_023503284.1	135000	4	-1.59781			NW_023503284.1	135000	23	-2.59208
NW_023503284.1	140000	1	-0.845192			NW_023503284.1	140000	7	-1.18066			NW_023503284.1	140000	7	-1.15004
NW_023503284.1	145000	3	-1.29256			NW_023503284.1	145000	11	-0.548969			NW_023503284.1	145000	11	-0.227435
NW_023503284.1	150000	0	nan			NW_023503284.1	150000	3	-1.47718			NW_023503284.1	150000	3	-1.48671
NW_023503284.1	155000	1	-1.11966			NW_023503284.1	155000	4	-0.699168			NW_023503284.1	155000	5	-1.27731
NW_023503284.1	160000	1	-0.845192			NW_023503284.1	160000	2	1.57811			NW_023503284.1	160000	2	0.903896
NW_023503284.1	165000	1	-0.845192			NW_023503284.1	165000	6	-1.14923			NW_023503284.1	165000	6	-0.742243
NW_023503284.1	170000	0	nan			NW_023503284.1	170000	1	-1.08393			NW_023503284.1	170000	1	-1.02565
NW_023503284.1	175000	1	-1.11966			NW_023503284.1	175000	8	-1.26652			NW_023503284.1	175000	8	-1.53519
NW_023503284.1	180000	5	-1.18853			NW_023503284.1	180000	7	0.288734			NW_023503284.1	180000	8	-0.368344
NW_023503284.1	185000	2	-1.30048			NW_023503284.1	185000	7	-0.0826973			NW_023503284.1	185000	7	-0.641912
NW_023503284.1	190000	1	-0.845192			NW_023503284.1	190000	2	-0.718584			NW_023503284.1	190000	3	-1.20106
NW_023503284.1	195000	2	-1.11882			NW_023503284.1	195000	7	-0.793552			NW_023503284.1	195000	7	-0.291595
NW_023503284.1	200000	3	-1.02708			NW_023503284.1	200000	5	-0.644594			NW_023503284.1	200000	6	0.0864165
NW_023503284.1	205000	1	-1.11966			NW_023503284.1	205000	26	-1.66993			NW_023503284.1	205000	27	-2.06032
NW_023503284.1	210000	3	-1.29256			NW_023503284.1	210000	14	-0.998819			NW_023503284.1	210000	15	-1.1955
NW_023503284.1	215000	4	-1.10689			NW_023503284.1	215000	2	-1.0721			NW_023503284.1	215000	4	-1.20951
NW_023503284.1	220000	0	nan			NW_023503284.1	220000	9	-1.72083			NW_023503284.1	220000	9	-1.88302
NW_023503284.1	225000	1	-0.845192			NW_023503284.1	225000	3	-0.095322			NW_023503284.1	225000	3	-0.474636
NW_023503284.1	230000	1	0.84384			NW_023503284.1	230000	6	-1.42646			NW_023503284.1	230000	6	-1.27221
NW_023503284.1	235000	1	-0.845192			NW_023503284.1	235000	7	-0.701208			NW_023503284.1	235000	7	-1.07577
NW_023503284.1	240000	1	0.84384			NW_023503284.1	240000	5	-1.3583			NW_023503284.1	240000	5	-1.14497
NW_023503284.1	245000	2	-1.11882			NW_023503284.1	245000	89	-0.0548978			NW_023503284.1	245000	91	-1.0614
NW_023503284.1	250000	17	-1.92955			NW_023503284.1	250000	11	-1.65469			NW_023503284.1	250000	25	-2.19166
NW_023503284.1	255000	1	-0.845192			NW_023503284.1	255000	6	-1.04137			NW_023503284.1	255000	6	-0.672937
NW_023503284.1	260000	0	nan			NW_023503284.1	260000	7	-1.35627			NW_023503284.1	260000	7	-1.59147
NW_023503284.1	265000	0	nan			NW_023503284.1	265000	6	-1.47284			NW_023503284.1	265000	6	-1.64322
NW_023503284.1	270000	1	-0.845192			NW_023503284.1	270000	4	-0.735114			NW_023503284.1	270000	5	-1.2636
NW_023503284.1	275000	1	-0.845192			NW_023503284.1	275000	6	0.195884			NW_023503284.1	275000	6	-0.37575
NW_023503284.1	280000	1	0.84384			NW_023503284.1	280000	5	-1.17003			NW_023503284.1	280000	5	-1.02548
NW_023503284.1	285000	0	nan			NW_023503284.1	285000	5	-1.23278			NW_023503284.1	285000	5	-1.45076
NW_023503284.1	290000	4	-1.41651			NW_023503284.1	290000	7	-0.000934613			NW_023503284.1	290000	7	1.55969
NW_023503284.1	295000	1	-0.845192			NW_023503284.1	295000	3	-0.827199			NW_023503284.1	295000	4	-1.29425
NW_023503284.1	300000	1	-0.845192			NW_023503284.1	300000	4	0.433834			NW_023503284.1	300000	4	0.169293
NW_023503284.1	305000	1	-1.11966			NW_023503284.1	305000	4	-1.13195			NW_023503284.1	305000	4	-1.29026
NW_023503284.1	310000	2	-0.000894905			NW_023503284.1	310000	3	-0.752269			NW_023503284.1	310000	4	-0.803245
NW_023503284.1	315000	2	-1.11882			NW_023503284.1	315000	7	-1.05615			NW_023503284.1	315000	8	-1.44337
NW_023503284.1	320000	53	-2.12928			NW_023503284.1	320000	5	-1.30292			NW_023503284.1	320000	58	-2.52911
NW_023503284.1	325000	48	-2.21828			NW_023503284.1	325000	11	-1.40057			NW_023503284.1	325000	56	-2.37571
NW_023503284.1	330000	1	-0.845192			NW_023503284.1	330000	5	-1.22154			NW_023503284.1	330000	6	-1.55468
NW_023503284.1	335000	2	-1.11882			NW_023503284.1	335000	6	-0.412493			NW_023503284.1	335000	6	-0.791586
NW_023503284.1	340000	3	-0.0117966			NW_023503284.1	340000	9	0.202123			NW_023503284.1	340000	9	0.738756
NW_023503284.1	345000	3	-0.743661			NW_023503284.1	345000	7	-1.38994			NW_023503284.1	345000	9	-1.00733
NW_023503284.1	350000	1	-0.106241			NW_023503284.1	350000	10	-1.6669			NW_023503284.1	350000	10	-1.75929
NW_023503284.1	355000	3	-1.57239			NW_023503284.1	355000	8	-0.808588			NW_023503284.1	355000	10	-1.27324
NW_023503284.1	360000	5	-1.90293			NW_023503284.1	360000	6	-0.831023			NW_023503284.1	360000	10	-1.27092
NW_023503284.1	365000	1	-0.845192			NW_023503284.1	365000	8	-1.15095			NW_023503284.1	365000	9	-1.58006
NW_023503284.1	370000	4	-1.64651			NW_023503284.1	370000	10	-0.845544			NW_023503284.1	370000	11	-1.06536
NW_023503284.1	375000	5	-1.60861			NW_023503284.1	375000	9	-2.2426			NW_023503284.1	375000	9	-1.96197
NW_023503284.1	380000	3	-1.03425			NW_023503284.1	380000	15	-1.46323			NW_023503284.1	380000	15	-1.67528
NW_023503284.1	385000	3	-1.57239			NW_023503284.1	385000	6	-1.00947			NW_023503284.1	385000	8	-1.3826
NW_023503284.1	390000	32	2.00075			NW_023503284.1	390000	35	1.90764			NW_023503284.1	390000	35	2.28201
NW_023503284.1	395000	29	2.01558			NW_023503284.1	395000	31	1.85201			NW_023503284.1	395000	32	2.13485
NW_023503284.1	400000	1	-1.11966			NW_023503284.1	400000	4	-1.76172			NW_023503284.1	400000	4	-1.67609
NW_023503284.1	405000	2	-1.48214			NW_023503284.1	405000	4	-1.44252			NW_023503284.1	405000	6	-1.82741
NW_023503284.1	410000	0	nan			NW_023503284.1	410000	4	-1.00255			NW_023503284.1	410000	4	-1.211
NW_023503284.1	415000	2	-1.11882			NW_023503284.1	415000	7	-1.43515			NW_023503284.1	415000	8	-1.67947
NW_023503284.1	420000	1	1.66724			NW_023503284.1	420000	5	-0.490778			NW_023503284.1	420000	5	-0.446034
NW_023503284.1	425000	1	-0.845192			NW_023503284.1	425000	4	-0.668974			NW_023503284.1	425000	4	-0.52908
NW_023503284.1	430000	0	nan			NW_023503284.1	430000	3	-1.67583			NW_023503284.1	430000	3	-1.60577
NW_023503284.1	435000	1	-1.11966			NW_023503284.1	435000	6	-1.59149			NW_023503284.1	435000	7	-1.83467
NW_023503284.1	440000	2	-1.11882			NW_023503284.1	440000	18	2.12365			NW_023503284.1	440000	18	2.08831
NW_023503284.1	445000	1	-1.11966			NW_023503284.1	445000	20	0.494328			NW_023503284.1	445000	21	-0.308626
NW_023503284.1	450000	0	nan			NW_023503284.1	450000	6	-0.454562			NW_023503284.1	450000	6	-0.939615
NW_023503284.1	455000	0	nan			NW_023503284.1	455000	9	-2.03247			NW_023503284.1	455000	9	-2.07467
NW_023503284.1	460000	1	-1.11966			NW_023503284.1	460000	3	-1.38831			NW_023503284.1	460000	4	-1.62973
NW_023503284.1	465000	2	0.376404			NW_023503284.1	465000	4	-0.746616			NW_023503284.1	465000	5	-0.709849
NW_023503284.1	470000	58	1.85902			NW_023503284.1	470000	76	1.14684			NW_023503284.1	470000	80	1.29463
NW_023503284.1	475000	73	1.76253			NW_023503284.1	475000	78	1.71395			NW_023503284.1	475000	82	1.93901
NW_023503284.1	480000	1	-1.11966			NW_023503284.1	480000	1	-1.08393			NW_023503284.1	480000	2	-1.37553
NW_023503284.1	485000	1	-0.845192			NW_023503284.1	485000	3	-0.0343322			NW_023503284.1	485000	3	-0.000172515
NW_023503284.1	490000	1	-0.845192			NW_023503284.1	490000	12	-1.47272			NW_023503284.1	490000	12	-1.45921
NW_023503284.1	495000	0	nan			NW_023503284.1	495000	7	-1.34281			NW_023503284.1	495000	7	-1.58676
NW_023503284.1	500000	1	-1.11966			NW_023503284.1	500000	6	-1.31643			NW_023503284.1	500000	7	-1.67804
NW_023503284.1	505000	1	-0.845192			NW_023503284.1	505000	2	-0.511431			NW_023503284.1	505000	2	0.625728
NW_023503284.1	510000	0	nan			NW_023503284.1	510000	3	-0.954407			NW_023503284.1	510000	3	-1.15476
NW_023503284.1	515000	3	0.748769			NW_023503284.1	515000	6	-1.78026			NW_023503284.1	515000	7	-1.09867
NW_023503284.1	520000	0	nan			NW_023503284.1	520000	7	-1.79202			NW_023503284.1	520000	7	-1.87139
NW_023503284.1	525000	0	nan			NW_023503284.1	525000	5	-1.61952			NW_023503284.1	525000	5	-1.69323
NW_023503284.1	530000	1	-0.845192			NW_023503284.1	530000	5	-0.720886			NW_023503284.1	530000	5	-1.05332
NW_023503284.1	535000	0	nan			NW_023503284.1	535000	5	-0.392336			NW_023503284.1	535000	5	-0.852463
NW_023503284.1	540000	6	-2.09929			NW_023503284.1	540000	2	-1.31528			NW_023503284.1	540000	8	-2.14191
NW_023503284.1	545000	1	-1.11966			NW_023503284.1	545000	8	-1.06666			NW_023503284.1	545000	9	-1.54546
NW_023503284.1	550000	4	0.532581			NW_023503284.1	550000	10	-0.422201			NW_023503284.1	550000	10	0.0954215
NW_023503284.1	555000	2	0.376404			NW_023503284.1	555000	9	-1.32752			NW_023503284.1	555000	10	-1.31773
NW_023503284.1	560000	5	-1.90293			NW_023503284.1	560000	15	-1.72371			NW_023503284.1	560000	19	-2.14469
NW_023503284.1	565000	2	-1.30048			NW_023503284.1	565000	22	-1.41597			NW_023503284.1	565000	22	-1.58183
NW_023503284.1	570000	4	-1.76151			NW_023503284.1	570000	8	-0.33675			NW_023503284.1	570000	10	-1.1822
NW_023503284.1	575000	0	nan			NW_023503284.1	575000	12	-0.93182			NW_023503284.1	575000	12	-1.43049
NW_023503284.1	580000	1	-1.11966			NW_023503284.1	580000	5	-0.653207			NW_023503284.1	580000	6	-1.25978
NW_023503284.1	585000	1	-0.845192			NW_023503284.1	585000	8	-1.18919			NW_023503284.1	585000	8	-0.938533
NW_023503284.1	590000	1	-0.845192			NW_023503284.1	590000	3	-0.926526			NW_023503284.1	590000	3	-1.0393
NW_023503284.1	595000	2	0.376404			NW_023503284.1	595000	3	-0.158054			NW_023503284.1	595000	4	-0.246939
NW_023503284.1	600000	1	-1.11966			NW_023503284.1	600000	6	-1.76948			NW_023503284.1	600000	7	-1.93269
NW_023503284.1	605000	1	-0.338482			NW_023503284.1	605000	4	-0.98817			NW_023503284.1	605000	4	-1.06844
NW_023503284.1	610000	2	-1.11882			NW_023503284.1	610000	3	1.12447			NW_023503284.1	610000	5	-0.395498
NW_023503284.1	615000	2	-1.11882			NW_023503284.1	615000	6	-0.846124			NW_023503284.1	615000	7	-0.736565
NW_023503284.1	620000	2	-1.11882			NW_023503284.1	620000	9	-1.06584			NW_023503284.1	620000	11	-1.6079
NW_023503284.1	625000	14	1.93462			NW_023503284.1	625000	40	-0.158489			NW_023503284.1	625000	40	-0.106216
NW_023503284.1	630000	100	-0.919905			NW_023503284.1	630000	119	2.37869			NW_023503284.1	630000	126	1.86292
NW_023503284.1	635000	6	-2.09929			NW_023503284.1	635000	10	1.85488			NW_023503284.1	635000	10	1.11947
NW_023503284.1	640000	0	nan			NW_023503284.1	640000	5	-1.11711			NW_023503284.1	640000	5	-1.37452
NW_023503284.1	645000	1	-1.11966			NW_023503284.1	645000	6	0.133321			NW_023503284.1	645000	7	-0.716017
NW_023503284.1	650000	0	nan			NW_023503284.1	650000	3	-1.10078			NW_023503284.1	650000	3	-1.25579
NW_023503284.1	655000	6	-1.50331			NW_023503284.1	655000	17	1.93078			NW_023503284.1	655000	17	0.823057
NW_023503284.1	660000	38	-2.10518			NW_023503284.1	660000	43	1.31316			NW_023503284.1	660000	44	0.40854
NW_023503284.1	665000	9	-1.79967			NW_023503284.1	665000	11	0.683142			NW_023503284.1	665000	12	-0.024527
NW_023503284.1	670000	1	-1.11966			NW_023503284.1	670000	4	-0.86308			NW_023503284.1	670000	5	-1.3621
NW_023503284.1	675000	1	-1.11966			NW_023503284.1	675000	5	-0.966991			NW_023503284.1	675000	6	-1.46657
NW_023503284.1	680000	9	-0.573496			NW_023503284.1	680000	15	-0.448043			NW_023503284.1	680000	17	-0.550942
NW_023503284.1	685000	54	1.27672			NW_023503284.1	685000	59	1.14429			NW_023503284.1	685000	60	1.55239
NW_023503284.1	690000	4	-1.33689			NW_023503284.1	690000	4	-1.08163			NW_023503284.1	690000	8	-1.73499
NW_023503284.1	695000	1	-0.845192			NW_023503284.1	695000	4	-1.0615			NW_023503284.1	695000	5	-1.45076
NW_023503284.1	700000	1	0.919495			NW_023503284.1	700000	5	-1.50596			NW_023503284.1	700000	6	-1.53623
NW_023503284.1	705000	3	-1.55732			NW_023503284.1	705000	13	-1.75442			NW_023503284.1	705000	14	-1.98089
NW_023503284.1	710000	1	-0.845192			NW_023503284.1	710000	5	-1.11711			NW_023503284.1	710000	5	-1.29915
NW_023503284.1	715000	3	-1.43248			NW_023503284.1	715000	5	-0.653207			NW_023503284.1	715000	7	-1.33379
NW_023503284.1	720000	1	-1.11966			NW_023503284.1	720000	9	-0.647941			NW_023503284.1	720000	10	-1.30359
NW_023503284.1	725000	1	-0.845192			NW_023503284.1	725000	9	-0.800984			NW_023503284.1	725000	9	-1.22911
NW_023503284.1	730000	1	-0.845192			NW_023503284.1	730000	143	0.194262			NW_023503284.1	730000	143	-0.91027
NW_023503284.1	735000	1	-1.11966			NW_023503284.1	735000	7	-0.99363			NW_023503284.1	735000	8	-1.50804
NW_023503284.1	740000	2	-1.11882			NW_023503284.1	740000	14	-1.40448			NW_023503284.1	740000	14	-1.67947
NW_023503284.1	745000	4	-1.64651			NW_023503284.1	745000	6	-0.0673144			NW_023503284.1	745000	8	-0.453216
NW_023503284.1	750000	15	-1.93761			NW_023503284.1	750000	19	0.745741			NW_023503284.1	750000	20	-0.119172
NW_023503284.1	755000	3	-0.16965			NW_023503284.1	755000	6	-1.44156			NW_023503284.1	755000	7	-1.18894
NW_023503284.1	760000	4	-1.53151			NW_023503284.1	760000	11	-1.22484			NW_023503284.1	760000	12	-0.96087
NW_023503284.1	765000	1	1.66724			NW_023503284.1	765000	11	-1.24376			NW_023503284.1	765000	11	-1.24618
NW_023503284.1	770000	0	nan			NW_023503284.1	770000	10	-1.21163			NW_023503284.1	770000	10	-1.5785
NW_023503284.1	775000	0	nan			NW_023503284.1	775000	10	-1.49398			NW_023503284.1	775000	10	-1.75363
NW_023503284.1	780000	5	-1.70672			NW_023503284.1	780000	8	-0.0612945			NW_023503284.1	780000	10	-0.759927
NW_023503284.1	785000	4	-1.53151			NW_023503284.1	785000	14	-0.802597			NW_023503284.1	785000	17	-1.40538
NW_023503284.1	790000	2	-1.30048			NW_023503284.1	790000	31	-1.08714			NW_023503284.1	790000	32	-1.62196
NW_023503284.1	795000	2	-1.11882			NW_023503284.1	795000	12	-0.866962			NW_023503284.1	795000	12	-1.30824
NW_023503284.1	800000	5	-1.51051			NW_023503284.1	800000	10	-0.668076			NW_023503284.1	800000	10	-0.974922
NW_023503284.1	805000	12	-0.352261			NW_023503284.1	805000	15	0.260761			NW_023503284.1	805000	17	-0.155336
NW_023503284.1	810000	3	-1.29256			NW_023503284.1	810000	16	-0.328905			NW_023503284.1	810000	17	-1.07485
NW_023503284.1	815000	17	0.0806804			NW_023503284.1	815000	27	0.0872217			NW_023503284.1	815000	28	-0.10778
NW_023503284.1	820000	2	-1.11882			NW_023503284.1	820000	19	-0.435757			NW_023503284.1	820000	19	-0.879148
NW_023503284.1	825000	22	-2.01937			NW_023503284.1	825000	26	0.510703			NW_023503284.1	825000	27	-0.0609843
NW_023503284.1	830000	1	-1.11966			NW_023503284.1	830000	4	-1.14345			NW_023503284.1	830000	5	-1.53555
NW_023503284.1	835000	2	-1.30048			NW_023503284.1	835000	10	-1.86316			NW_023503284.1	835000	12	-2.09896
NW_023503284.1	840000	0	nan			NW_023503284.1	840000	5	-0.194222			NW_023503284.1	840000	5	-0.765524
NW_023503284.1	845000	2	-1.11882			NW_023503284.1	845000	8	0.130742			NW_023503284.1	845000	8	-0.0719175
NW_023503284.1	850000	1	1.68836			NW_023503284.1	850000	4	-1.44252			NW_023503284.1	850000	4	-0.733458
NW_023503284.1	855000	0	nan			NW_023503284.1	855000	4	-1.46265			NW_023503284.1	855000	4	-1.53801
NW_023503284.1	860000	1	-1.11966			NW_023503284.1	860000	5	-1.35584			NW_023503284.1	860000	6	-1.68051
NW_023503284.1	865000	4	0.0460461			NW_023503284.1	865000	12	-1.50169			NW_023503284.1	865000	13	-1.34659
NW_023503284.1	870000	1	0.111926			NW_023503284.1	870000	4	-0.205996			NW_023503284.1	870000	4	-0.492193
NW_023503284.1	875000	1	-1.11966			NW_023503284.1	875000	5	-1.18233			NW_023503284.1	875000	6	-1.5483
NW_023503284.1	880000	1	-1.11966			NW_023503284.1	880000	7	-1.55516			NW_023503284.1	880000	8	-1.83388
NW_023503284.1	885000	1	-0.845192			NW_023503284.1	885000	4	-1.36919			NW_023503284.1	885000	5	-1.61436
NW_023503284.1	890000	1	-0.845192			NW_023503284.1	890000	4	-1.38069			NW_023503284.1	890000	5	-1.61778
NW_023503284.1	895000	3	-0.00103388			NW_023503284.1	895000	7	-1.53904			NW_023503284.1	895000	9	-1.41295
NW_023503284.1	900000	2	-1.11882			NW_023503284.1	900000	5	-0.346807			NW_023503284.1	900000	6	-0.35654
NW_023503284.1	905000	2	-1.30048			NW_023503284.1	905000	10	-0.305465			NW_023503284.1	905000	11	-1.06768
NW_023503284.1	910000	1	-0.845192			NW_023503284.1	910000	8	-0.640012			NW_023503284.1	910000	8	-0.856783
NW_023503284.1	915000	0	nan			NW_023503284.1	915000	6	-1.23661			NW_023503284.1	915000	6	-1.48163
NW_023503284.1	920000	3	-1.29256			NW_023503284.1	920000	5	-1.10358			NW_023503284.1	920000	7	-1.5369
NW_023503284.1	925000	0	nan			NW_023503284.1	925000	8	-1.69404			NW_023503284.1	925000	8	-1.84358
NW_023503284.1	930000	1	-1.11966			NW_023503284.1	930000	9	-1.09676			NW_023503284.1	930000	10	-1.57876
NW_023503284.1	935000	2	-1.11882			NW_023503284.1	935000	8	-1.00758			NW_023503284.1	935000	8	-0.671624
NW_023503284.1	940000	1	-0.845192			NW_023503284.1	940000	10	-1.18755			NW_023503284.1	940000	10	-1.51395
NW_023503284.1	945000	4	-0.985998			NW_023503284.1	945000	12	-1.73719			NW_023503284.1	945000	12	-1.26638
NW_023503284.1	950000	0	nan			NW_023503284.1	950000	18	-2.43951			NW_023503284.1	950000	18	-2.46232
NW_023503284.1	955000	1	0.111926			NW_023503284.1	955000	10	-0.828588			NW_023503284.1	955000	10	-1.15597
NW_023503283.1	0	1	-0.845192			NW_023503283.1	0	9	-0.480446			NW_023503283.1	0	9	-1.00057
NW_023503283.1	5000	1	0.316017			NW_023503283.1	5000	4	-1.59781			NW_023503283.1	5000	5	-1.53727
NW_023503283.1	10000	1	-0.845192			NW_023503283.1	10000	5	-0.573223			NW_023503283.1	10000	6	-1.18219
NW_023503283.1	15000	1	-0.845192			NW_023503283.1	15000	5	-0.971913			NW_023503283.1	15000	5	-0.258452
NW_023503283.1	20000	0	nan			NW_023503283.1	20000	3	-1.18965			NW_023503283.1	20000	3	-1.31171
NW_023503283.1	25000	1	-0.845192			NW_023503283.1	25000	3	-0.222529			NW_023503283.1	25000	3	-0.115631
NW_023503283.1	30000	2	-1.11882			NW_023503283.1	30000	10	-0.863609			NW_023503283.1	30000	10	-0.512015
NW_023503283.1	35000	2	-1.11882			NW_023503283.1	35000	6	-0.264714			NW_023503283.1	35000	6	0.84577
NW_023503283.1	40000	1	-0.845192			NW_023503283.1	40000	5	-0.386184			NW_023503283.1	40000	5	-0.810064
NW_023503283.1	45000	0	nan			NW_023503283.1	45000	4	-1.51873			NW_023503283.1	45000	4	-1.57839
NW_023503283.1	50000	31	2.35986			NW_023503283.1	50000	38	1.90687			NW_023503283.1	50000	38	2.34087
NW_023503283.1	55000	1	-0.845192			NW_023503283.1	55000	1	-1.08393			NW_023503283.1	55000	2	-1.29903
NW_023503283.1	60000	37	1.7899			NW_023503283.1	60000	41	1.81348			NW_023503283.1	60000	42	2.08531
NW_023503283.1	65000	17	1.43879			NW_023503283.1	65000	21	1.08431			NW_023503283.1	65000	22	1.14955
NW_023503283.1	70000	5	0.46919			NW_023503283.1	70000	5	0.354592			NW_023503283.1	70000	7	-0.100605
NW_023503283.1	75000	1	-0.845192			NW_023503283.1	75000	4	-1.00542			NW_023503283.1	75000	4	-0.336666
NW_023503283.1	80000	2	-1.11882			NW_023503283.1	80000	6	-0.79219			NW_023503283.1	80000	6	-0.30343
NW_023503283.1	85000	3	-0.15964			NW_023503283.1	85000	8	-0.848842			NW_023503283.1	85000	9	-1.11139
NW_023503283.1	90000	1	-0.845192			NW_023503283.1	90000	9	-1.37351			NW_023503283.1	90000	9	-1.618
NW_023503283.1	95000	0	nan			NW_023503283.1	95000	5	-1.19587			NW_023503283.1	95000	5	-1.40193
NW_023503283.1	100000	0	nan			NW_023503283.1	100000	2	-0.943751			NW_023503283.1	100000	2	-1.07418
NW_023503283.1	105000	2	-1.11882			NW_023503283.1	105000	1	-0.8912			NW_023503283.1	105000	3	-1.39494
NW_023503283.1	110000	0	nan			NW_023503283.1	110000	5	-1.17987			NW_023503283.1	110000	5	-1.41435
NW_023503283.1	115000	4	-1.41651			NW_023503283.1	115000	18	-0.210544			NW_023503283.1	115000	20	-0.572309
NW_023503283.1	120000	0	nan			NW_023503283.1	120000	0	nan			NW_023503283.1	120000	0	nan
NW_023503283.1	125000	3	-1.1957			NW_023503283.1	125000	9	-2.10859			NW_023503283.1	125000	10	-2.04012
NW_023503283.1	130000	0	nan			NW_023503283.1	130000	7	-1.46016			NW_023503283.1	130000	7	-1.65615
NW_023503283.1	135000	3	-1.29256			NW_023503283.1	135000	6	0.874376			NW_023503283.1	135000	7	0.274302
NW_023503283.1	140000	0	nan			NW_023503283.1	140000	9	-1.20619			NW_023503283.1	140000	9	-1.54965
NW_023503283.1	145000	1	-0.845192			NW_023503283.1	145000	7	-0.621369			NW_023503283.1	145000	7	-1.03366
NW_023503283.1	150000	2	-1.11882			NW_023503283.1	150000	8	-0.943274			NW_023503283.1	150000	9	-1.39342
NW_023503283.1	155000	2	-1.11882			NW_023503283.1	155000	5	0.558859			NW_023503283.1	155000	6	-0.184781
NW_023503283.1	160000	0	nan			NW_023503283.1	160000	7	-1.47601			NW_023503283.1	160000	7	-1.64334
NW_023503283.1	165000	2	0.446274			NW_023503283.1	165000	6	-0.559194			NW_023503283.1	165000	6	-0.258231
NW_023503283.1	170000	2	-0.946471			NW_023503283.1	170000	5	-0.0440981			NW_023503283.1	170000	5	-0.146673
NW_023503283.1	175000	2	-1.11882			NW_023503283.1	175000	3	0.139924			NW_023503283.1	175000	4	-0.302769
NW_023503283.1	180000	2	-1.30048			NW_023503283.1	180000	7	-0.241413			NW_023503283.1	180000	7	-0.739933
NW_023503283.1	185000	2	-1.11882			NW_023503283.1	185000	2	-0.27951			NW_023503283.1	185000	4	-1.18807
NW_023503283.1	190000	2	-1.11882			NW_023503283.1	190000	7	-1.15042			NW_023503283.1	190000	7	-0.223216
NW_023503283.1	195000	0	nan			NW_023503283.1	195000	4	0.405078			NW_023503283.1	195000	4	-0.325201
NW_023503283.1	200000	0	nan			NW_023503283.1	200000	4	-0.762432			NW_023503283.1	200000	4	-1.10682
NW_023503283.1	205000	0	nan			NW_023503283.1	205000	9	-1.32196			NW_023503283.1	205000	9	-1.61381
NW_023503283.1	210000	0	nan			NW_023503283.1	210000	2	1.19083			NW_023503283.1	210000	2	0.372287
NW_023503283.1	215000	2	-1.11882			NW_023503283.1	215000	5	-0.222524			NW_023503283.1	215000	5	-0.282863
NW_023503283.1	220000	1	-0.845192			NW_023503283.1	220000	6	-0.649804			NW_023503283.1	220000	6	-0.393829
NW_023503283.1	225000	2	-1.11882			NW_023503283.1	225000	4	-0.653158			NW_023503283.1	225000	4	0.80735
NW_023503283.1	230000	1	-0.5848			NW_023503283.1	230000	8	-1.35081			NW_023503283.1	230000	8	-1.52085
NW_023503283.1	235000	1	-0.845192			NW_023503283.1	235000	4	-0.44755			NW_023503283.1	235000	5	-1.106
NW_023503283.1	240000	3	-1.43248			NW_023503283.1	240000	7	-0.780085			NW_023503283.1	240000	8	-1.03523
NW_023503283.1	245000	1	-0.845192			NW_023503283.1	245000	8	-0.911992			NW_023503283.1	245000	8	-1.24571
NW_023503283.1	250000	1	-0.845192			NW_023503283.1	250000	3	-0.85508			NW_023503283.1	250000	3	0.0112531
NW_023503283.1	255000	1	-0.845192			NW_023503283.1	255000	2	-1.18693			NW_023503283.1	255000	3	-1.42717
NW_023503283.1	260000	1	-0.845192			NW_023503283.1	260000	5	-0.402181			NW_023503283.1	260000	5	-0.797644
NW_023503283.1	265000	2	-1.30048			NW_023503283.1	265000	6	-0.668141			NW_023503283.1	265000	6	-0.378763
NW_023503283.1	270000	1	-0.845192			NW_023503283.1	270000	8	-0.467527			NW_023503283.1	270000	8	-0.96426
NW_023503283.1	275000	3	-0.546345			NW_023503283.1	275000	6	-1.41459			NW_023503283.1	275000	7	-1.37623
NW_023503283.1	280000	1	-0.5848			NW_023503283.1	280000	6	-1.29809			NW_023503283.1	280000	6	-1.40931
NW_023503283.1	285000	3	-0.431543			NW_023503283.1	285000	7	-0.252956			NW_023503283.1	285000	7	0.370639
NW_023503283.1	290000	2	-1.11882			NW_023503283.1	290000	12	-0.655386			NW_023503283.1	290000	12	-0.532446
NW_023503283.1	295000	3	-1.57239			NW_023503283.1	295000	2	-1.31528			NW_023503283.1	295000	4	-0.568959
NW_023503283.1	300000	2	-1.11882			NW_023503283.1	300000	4	-0.420231			NW_023503283.1	300000	4	0.429501
NW_023503283.1	305000	1	-1.11966			NW_023503283.1	305000	11	-1.43909			NW_023503283.1	305000	12	-1.81482
NW_023503283.1	310000	6	-0.212389			NW_023503283.1	310000	12	-0.291066			NW_023503283.1	310000	13	-0.641705
NW_023503283.1	315000	0	nan			NW_023503283.1	315000	7	-1.83531			NW_023503283.1	315000	7	-1.90069
NW_023503283.1	320000	3	-1.71231			NW_023503283.1	320000	4	-1.67976			NW_023503283.1	320000	7	-2.03206
NW_023503283.1	325000	8	-0.622298			NW_023503283.1	325000	13	-1.00009			NW_023503283.1	325000	13	-0.720291
NW_023503283.1	330000	1	-0.845192			NW_023503283.1	330000	7	-0.224099			NW_023503283.1	330000	7	-0.0598467
NW_023503283.1	335000	6	-1.18882			NW_023503283.1	335000	9	0.017361			NW_023503283.1	335000	10	-0.229642
NW_023503283.1	340000	54	-2.81062			NW_023503283.1	340000	82	2.48754			NW_023503283.1	340000	82	1.19932
NW_023503283.1	345000	3	-1.57239			NW_023503283.1	345000	12	-1.64526			NW_023503283.1	345000	15	-2.04443
NW_023503283.1	350000	2	-1.30048			NW_023503283.1	350000	3	0.76202			NW_023503283.1	350000	4	-0.254915
NW_023503283.1	355000	2	-1.11882			NW_023503283.1	355000	6	-0.77601			NW_023503283.1	355000	7	-1.1748
NW_023503283.1	360000	2	-1.30048			NW_023503283.1	360000	1	0.12319			NW_023503283.1	360000	2	0.549232
NW_023503283.1	365000	1	-0.845192			NW_023503283.1	365000	4	-0.644531			NW_023503283.1	365000	4	-0.539548
NW_023503283.1	370000	1	-1.11966			NW_023503283.1	370000	2	-1.18693			NW_023503283.1	370000	3	-1.48671
NW_023503283.1	375000	2	-1.11882			NW_023503283.1	375000	10	-0.103365			NW_023503283.1	375000	10	-0.353084
NW_023503283.1	380000	3	-1.71231			NW_023503283.1	380000	8	-1.3204			NW_023503283.1	380000	11	-1.87667
NW_023503283.1	385000	0	nan			NW_023503283.1	385000	6	-1.14276			NW_023503283.1	385000	6	-1.4014
NW_023503283.1	390000	1	-0.845192			NW_023503283.1	390000	5	-1.25986			NW_023503283.1	390000	5	-0.535115
NW_023503283.1	395000	1	-0.845192			NW_023503283.1	395000	5	-0.535077			NW_023503283.1	395000	5	-0.186074
NW_023503283.1	400000	6	0.550727			NW_023503283.1	400000	11	0.139066			NW_023503283.1	400000	11	0.556015
NW_023503283.1	405000	3	-0.546345			NW_023503283.1	405000	7	-1.0071			NW_023503283.1	405000	8	-1.23808
NW_023503283.1	410000	0	nan			NW_023503283.1	410000	4	-1.67976			NW_023503283.1	410000	4	-1.67609
NW_023503283.1	415000	1	-0.845192			NW_023503283.1	415000	5	-0.619983			NW_023503283.1	415000	5	-0.641326
NW_023503283.1	420000	0	nan			NW_023503283.1	420000	5	-1.37306			NW_023503283.1	420000	5	-1.53555
NW_023503283.1	425000	1	-0.845192			NW_023503283.1	425000	5	-0.813175			NW_023503283.1	425000	5	-0.762526
NW_023503283.1	430000	4	-1.8765			NW_023503283.1	430000	4	-0.543883			NW_023503283.1	430000	8	-1.66575
NW_023503283.1	435000	4	-1.5374			NW_023503283.1	435000	12	-1.94625			NW_023503283.1	435000	12	-1.56276
NW_023503283.1	440000	3	-0.790309			NW_023503283.1	440000	16	-0.918655			NW_023503283.1	440000	16	-1.35233
NW_023503283.1	445000	56	-2.13517			NW_023503283.1	445000	69	2.80486			NW_023503283.1	445000	69	1.64178
NW_023503283.1	450000	3	-1.43248			NW_023503283.1	450000	33	-1.29745			NW_023503283.1	450000	35	-1.85679
NW_023503283.1	455000	2	-1.30048			NW_023503283.1	455000	10	-1.84127			NW_023503283.1	455000	11	-1.99718
NW_023503283.1	460000	1	-0.845192			NW_023503283.1	460000	8	-0.640881			NW_023503283.1	460000	8	-1.07367
NW_023503283.1	465000	1	-0.845192			NW_023503283.1	465000	7	-0.0624971			NW_023503283.1	465000	7	-0.429027
NW_023503283.1	470000	1	-0.845192			NW_023503283.1	470000	9	-0.942925			NW_023503283.1	470000	10	-1.4818
NW_023503283.1	475000	4	-1.41651			NW_023503283.1	475000	11	-1.32081			NW_023503283.1	475000	11	0.439321
NW_023503283.1	480000	3	-0.546345			NW_023503283.1	480000	6	-0.809449			NW_023503283.1	480000	6	-0.787066
NW_023503283.1	485000	0	nan			NW_023503283.1	485000	3	-1.37785			NW_023503283.1	485000	3	-1.42717
NW_023503283.1	490000	12	-2.0554			NW_023503283.1	490000	10	-1.63334			NW_023503283.1	490000	20	-2.2087
NW_023503283.1	495000	2	-1.11882			NW_023503283.1	495000	5	0.0863374			NW_023503283.1	495000	5	-0.114553
NW_023503283.1	500000	0	nan			NW_023503283.1	500000	0	nan			NW_023503283.1	500000	0	nan
NW_023503283.1	505000	2	-1.48214			NW_023503283.1	505000	7	-1.5804			NW_023503283.1	505000	7	-1.67467
NW_023503283.1	510000	3	-1.55806			NW_023503283.1	510000	6	-0.904527			NW_023503283.1	510000	7	-1.32543
NW_023503283.1	515000	2	-1.29118			NW_023503283.1	515000	3	-0.827199			NW_023503283.1	515000	4	-1.25487
NW_023503283.1	520000	0	nan			NW_023503283.1	520000	5	-1.31031			NW_023503283.1	520000	5	-1.49573
NW_023503283.1	525000	1	-1.11966			NW_023503283.1	525000	7	-1.68428			NW_023503283.1	525000	8	-1.90642
NW_023503283.1	530000	2	-1.30048			NW_023503283.1	530000	5	-0.852552			NW_023503283.1	530000	6	-1.30121
NW_023503283.1	535000	2	-1.11882			NW_023503283.1	535000	6	-0.680007			NW_023503283.1	535000	7	-0.656396
NW_023503283.1	540000	2	-1.11882			NW_023503283.1	540000	11	-0.55708			NW_023503283.1	540000	11	-0.364891
NW_023503283.1	545000	0	nan			NW_023503283.1	545000	13	-1.35645			NW_023503283.1	545000	13	-1.66566
NW_023503283.1	550000	1	-1.11966			NW_023503283.1	550000	3	-0.154569			NW_023503283.1	550000	3	-0.59671
NW_023503283.1	555000	0	nan			NW_023503283.1	555000	5	-1.10727			NW_023503283.1	555000	5	-1.3711
NW_023503283.1	560000	0	nan			NW_023503283.1	560000	3	-0.464746			NW_023503283.1	560000	3	-0.859499
NW_023503283.1	565000	0	nan			NW_023503283.1	565000	7	-1.84877			NW_023503283.1	565000	7	-1.90541
NW_023503283.1	570000	0	nan			NW_023503283.1	570000	5	-1.50596			NW_023503283.1	570000	5	-1.61778
NW_023503283.1	575000	0	nan			NW_023503283.1	575000	9	-1.89687			NW_023503283.1	575000	9	-1.99182
NW_023503283.1	580000	1	-0.338482			NW_023503283.1	580000	8	-1.36037			NW_023503283.1	580000	8	-1.51414
NW_023503283.1	585000	2	-1.30048			NW_023503283.1	585000	7	-1.00133			NW_023503283.1	585000	8	-1.21398
NW_023503283.1	590000	0	nan			NW_023503283.1	590000	3	-1.0154			NW_023503283.1	590000	3	-1.20106
NW_023503283.1	595000	1	-0.845192			NW_023503283.1	595000	6	-0.617443			NW_023503283.1	595000	6	-0.709473
NW_023503283.1	600000	0	nan			NW_023503283.1	600000	6	-1.95177			NW_023503283.1	600000	6	-1.93702
NW_023503283.1	605000	0	nan			NW_023503283.1	605000	7	-1.37455			NW_023503283.1	605000	7	-1.61202
NW_023503283.1	610000	1	-1.11966			NW_023503283.1	610000	5	-0.25944			NW_023503283.1	610000	6	-1.01269
NW_023503283.1	615000	1	-0.845192			NW_023503283.1	615000	12	-1.43314			NW_023503283.1	615000	13	-1.79439
NW_023503283.1	620000	2	-1.11882			NW_023503283.1	620000	6	-0.163317			NW_023503283.1	620000	6	-0.620957
NW_023503283.1	625000	3	-1.57239			NW_023503283.1	625000	8	-1.5889			NW_023503283.1	625000	10	-1.47538
NW_023503283.1	630000	8	-1.6719			NW_023503283.1	630000	11	-1.02681			NW_023503283.1	630000	13	-1.35682
NW_023503283.1	635000	0	nan			NW_023503283.1	635000	3	-1.10078			NW_023503283.1	635000	3	-1.25579
NW_023503283.1	640000	0	nan			NW_023503283.1	640000	6	-0.827787			NW_023503283.1	640000	6	-1.22814
NW_023503283.1	645000	2	-1.11882			NW_023503283.1	645000	7	-1.35627			NW_023503283.1	645000	8	-1.38603
NW_023503283.1	650000	0	nan			NW_023503283.1	650000	5	-1.17987			NW_023503283.1	650000	5	-1.41435
NW_023503283.1	655000	3	-1.43248			NW_023503283.1	655000	11	-1.0552			NW_023503283.1	655000	12	-1.09158
NW_023503283.1	660000	0	nan			NW_023503283.1	660000	3	-1.10078			NW_023503283.1	660000	3	-1.25579
NW_023503283.1	665000	5	-1.70672			NW_023503283.1	665000	4	1.11249			NW_023503283.1	665000	7	-0.175047
NW_023503283.1	670000	3	-1.29256			NW_023503283.1	670000	7	0.251087			NW_023503283.1	670000	8	-0.0960156
NW_023503283.1	675000	2	-1.30048			NW_023503283.1	675000	4	-1.28724			NW_023503283.1	675000	5	-0.689292
NW_023503283.1	680000	1	-1.11966			NW_023503283.1	680000	12	-1.96451			NW_023503283.1	680000	13	-2.14991
NW_023503283.1	685000	1	-0.845192			NW_023503283.1	685000	6	-0.829944			NW_023503283.1	685000	6	-0.862775
NW_023503283.1	690000	0	nan			NW_023503283.1	690000	5	-0.723347			NW_023503283.1	690000	5	-1.09358
NW_023503283.1	695000	1	-1.1056			NW_023503283.1	695000	8	-1.15877			NW_023503283.1	695000	9	-1.59791
NW_023503283.1	700000	2	-1.30048			NW_023503283.1	700000	5	-1.30292			NW_023503283.1	700000	6	-0.834902
NW_023503283.1	705000	1	-0.845192			NW_023503283.1	705000	13	-1.31962			NW_023503283.1	705000	13	-1.18667
NW_023503283.1	710000	1	-1.11966			NW_023503283.1	710000	8	-1.53503			NW_023503283.1	710000	9	-1.82471
NW_023503283.1	715000	1	-0.845192			NW_023503283.1	715000	14	-1.69502			NW_023503283.1	715000	14	-1.51856
NW_023503283.1	720000	1	-1.11966			NW_023503283.1	720000	6	-1.48794			NW_023503283.1	720000	7	-1.77404
NW_023503283.1	725000	1	-0.845192			NW_023503283.1	725000	2	-1.0721			NW_023503283.1	725000	2	-1.0085
NW_023503283.1	730000	1	-1.11966			NW_023503283.1	730000	9	-1.77872			NW_023503283.1	730000	10	-1.97274
NW_023503283.1	735000	5	-1.13334			NW_023503283.1	735000	6	-0.564591			NW_023503283.1	735000	8	-1.06299
NW_023503283.1	740000	5	-1.70672			NW_023503283.1	740000	8	-1.13531			NW_023503283.1	740000	10	-0.871025
NW_023503283.1	745000	1	-0.845192			NW_023503283.1	745000	9	-0.88821			NW_023503283.1	745000	9	-1.06117
NW_023503283.1	750000	1	-1.11966			NW_023503283.1	750000	6	-0.541935			NW_023503283.1	750000	7	-1.15324
NW_023503283.1	755000	3	-1.29256			NW_023503283.1	755000	7	-0.407824			NW_023503283.1	755000	8	-0.145737
NW_023503283.1	760000	0	nan			NW_023503283.1	760000	7	-1.2445			NW_023503283.1	760000	7	-1.51136
NW_023503283.1	765000	1	-1.11966			NW_023503283.1	765000	5	-1.90219			NW_023503283.1	765000	6	-1.97431
NW_023503283.1	770000	23	-1.22414			NW_023503283.1	770000	29	-1.78439			NW_023503283.1	770000	36	-1.65508
NW_023503283.1	775000	2	-1.48214			NW_023503283.1	775000	4	-1.10032			NW_023503283.1	775000	6	-1.64285
NW_023503283.1	780000	0	nan			NW_023503283.1	780000	6	-1.84175			NW_023503283.1	780000	6	-1.86696
NW_023503283.1	785000	0	nan			NW_023503283.1	785000	6	-1.95177			NW_023503283.1	785000	6	-1.93702
NW_023503283.1	790000	1	-1.11966			NW_023503283.1	790000	5	-1.01006			NW_023503283.1	790000	5	-1.2409
NW_023503283.1	795000	3	-1.71231			NW_023503283.1	795000	4	-1.01836			NW_023503283.1	795000	7	-1.73497
NW_023503283.1	800000	5	-1.70672			NW_023503283.1	800000	11	-1.08426			NW_023503283.1	800000	13	-0.526348
NW_023503283.1	805000	0	nan			NW_023503283.1	805000	4	-0.683352			NW_023503283.1	805000	4	-1.0166
NW_023503283.1	810000	40	1.34999			NW_023503283.1	810000	43	1.47739			NW_023503283.1	810000	47	1.51434
NW_023503283.1	815000	5	-1.42247			NW_023503283.1	815000	10	-1.06425			NW_023503283.1	815000	11	-1.35166
NW_023503283.1	820000	31	1.60619			NW_023503283.1	820000	32	1.62907			NW_023503283.1	820000	34	1.7815
NW_023503283.1	825000	2	-1.11882			NW_023503283.1	825000	6	-0.112619			NW_023503283.1	825000	6	-0.0405191
NW_023503283.1	830000	2	-1.11882			NW_023503283.1	830000	10	-1.33493			NW_023503283.1	830000	10	-0.828335
NW_023503283.1	835000	0	nan			NW_023503283.1	835000	7	-1.89013			NW_023503283.1	835000	7	-1.93404
NW_023503283.1	840000	13	0.220802			NW_023503283.1	840000	17	-0.471552			NW_023503283.1	840000	17	-0.110005
NW_023503283.1	845000	3	-1.71231			NW_023503283.1	845000	8	-0.656522			NW_023503283.1	845000	11	-1.49389
NW_023503283.1	850000	7	-0.241981			NW_023503283.1	850000	17	-1.63933			NW_023503283.1	850000	17	-1.34098
NW_023503283.1	855000	0	nan			NW_023503283.1	855000	2	0.542348			NW_023503283.1	855000	2	-0.109869
NW_023503283.1	860000	5	-1.60861			NW_023503283.1	860000	22	-1.33996			NW_023503283.1	860000	23	-1.47517
NW_023503283.1	865000	0	nan			NW_023503283.1	865000	8	-1.71229			NW_023503283.1	865000	8	-1.83718
NW_023503283.1	870000	1	-1.11966			NW_023503283.1	870000	2	-0.943751			NW_023503283.1	870000	3	-1.37125
NW_023503283.1	875000	3	-0.782212			NW_023503283.1	875000	9	-0.234256			NW_023503283.1	875000	10	-0.515202
NW_023503283.1	880000	5	0.582388			NW_023503283.1	880000	14	-1.33971			NW_023503283.1	880000	15	-0.837689
NW_023503283.1	885000	24	2.59092			NW_023503283.1	885000	31	1.47577			NW_023503283.1	885000	31	2.18778
NW_023503283.1	890000	16	0.942686			NW_023503283.1	890000	31	-1.25964			NW_023503283.1	890000	34	-0.865656
NW_023503283.1	895000	22	2.18942			NW_023503283.1	895000	29	1.04098			NW_023503283.1	895000	30	1.34634
NW_023503283.1	900000	3	1.29049			NW_023503283.1	900000	17	-1.50858			NW_023503283.1	900000	17	-0.935675
NW_023503283.1	905000	3	-1.71231			NW_023503283.1	905000	7	-1.24469			NW_023503283.1	905000	9	-1.73126
NW_023503283.1	910000	0	nan			NW_023503283.1	910000	8	-1.18919			NW_023503283.1	910000	8	-1.44856
NW_023503283.1	915000	2	-1.11882			NW_023503283.1	915000	9	-0.701863			NW_023503283.1	915000	9	-0.425951
NW_023503283.1	920000	3	-1.43248			NW_023503283.1	920000	9	-0.158678			NW_023503283.1	920000	11	-0.888941
NW_023503283.1	925000	2	0.376404			NW_023503283.1	925000	7	-0.958039			NW_023503283.1	925000	8	-1.02028
NW_023503283.1	930000	1	-0.845192			NW_023503283.1	930000	2	-1.31528			NW_023503283.1	930000	3	-1.48671
NW_023503283.1	935000	2	2.23495			NW_023503283.1	935000	11	-1.64766			NW_023503283.1	935000	11	-1.13545
NW_023503283.1	940000	1	0.681974			NW_023503283.1	940000	7	-1.44765			NW_023503283.1	940000	7	-1.42844
NW_023503283.1	945000	1	1.68836			NW_023503283.1	945000	9	-1.77079			NW_023503283.1	945000	9	-1.51059
NW_023503283.1	950000	2	-0.984748			NW_023503283.1	950000	4	-1.20672			NW_023503283.1	950000	6	-1.56638
NW_023503283.1	955000	2	-1.10116			NW_023503283.1	955000	12	-1.12654			NW_023503283.1	955000	12	-0.859474
NW_023503283.1	960000	1	0.84384			NW_023503283.1	960000	5	-0.130235			NW_023503283.1	960000	5	-0.433186
NW_023503283.1	965000	1	1.68836			NW_023503283.1	965000	6	-1.146			NW_023503283.1	965000	6	-1.01005
NW_023503283.1	970000	2	0.15282			NW_023503283.1	970000	4	-1.24842			NW_023503283.1	970000	5	-1.06917
NW_023503283.1	975000	1	1.68836			NW_023503283.1	975000	8	-0.519318			NW_023503283.1	975000	8	-0.739595
NW_023503283.1	980000	4	-0.776641			NW_023503283.1	980000	8	-1.50722			NW_023503283.1	980000	10	-1.63506
NW_023503283.1	985000	1	-0.845192			NW_023503283.1	985000	4	-1.14345			NW_023503283.1	985000	4	-1.25587
NW_023503283.1	990000	1	-0.845192			NW_023503283.1	990000	6	-0.863383			NW_023503283.1	990000	7	-1.36175
NW_023503283.1	995000	1	-0.338482			NW_023503283.1	995000	4	-0.661785			NW_023503283.1	995000	4	-0.854589
NW_023503283.1	1000000	2	0.558067			NW_023503283.1	1000000	5	-0.344346			NW_023503283.1	1000000	5	0.0164978
NW_023503283.1	1005000	2	2.12316			NW_023503283.1	1005000	6	-1.44156			NW_023503283.1	1005000	6	-0.308703
NW_023503283.1	1010000	2	0.557589			NW_023503283.1	1010000	5	-0.588468			NW_023503283.1	1010000	6	-0.553158
NW_023503283.1	1015000	6	-2.09929			NW_023503283.1	1015000	13	-0.942668			NW_023503283.1	1015000	19	-1.85824
NW_023503283.1	1020000	2	0.376404			NW_023503283.1	1020000	8	-1.85132			NW_023503283.1	1020000	9	-1.57364
NW_023503283.1	1025000	2	-1.48214			NW_023503283.1	1025000	5	-1.69915			NW_023503283.1	1025000	7	-1.96739
NW_023503283.1	1030000	0	nan			NW_023503283.1	1030000	5	-1.50842			NW_023503283.1	1030000	5	-1.61864
NW_023503283.1	1035000	3	-0.00103388			NW_023503283.1	1035000	7	-0.828181			NW_023503283.1	1035000	7	-0.582627
NW_023503283.1	1040000	1	1.68836			NW_023503283.1	1040000	8	-1.628			NW_023503283.1	1040000	8	-1.31892
NW_023503283.1	1045000	2	-1.30048			NW_023503283.1	1045000	5	-0.852552			NW_023503283.1	1045000	6	-1.30121
NW_023503283.1	1050000	3	-1.43248			NW_023503283.1	1050000	4	-0.108224			NW_023503283.1	1050000	5	-0.4743
NW_023503283.1	1055000	10	-1.14414			NW_023503283.1	1055000	14	-1.18839			NW_023503283.1	1055000	16	-1.05831
NW_023503283.1	1060000	8	-1.63883			NW_023503283.1	1060000	3	-1.47045			NW_023503283.1	1060000	11	-2.06455
NW_023503283.1	1065000	12	-0.966154			NW_023503283.1	1065000	20	-0.728568			NW_023503283.1	1065000	29	-1.41428
NW_023503283.1	1070000	6	-0.317949			NW_023503283.1	1070000	13	-0.886442			NW_023503283.1	1070000	14	-0.83756
NW_023503283.1	1075000	6	-0.652931			NW_023503283.1	1075000	8	-0.299679			NW_023503283.1	1075000	9	-0.586056
NW_023503283.1	1080000	6	-1.84198			NW_023503283.1	1080000	9	-1.16512			NW_023503283.1	1080000	11	-0.815832
NW_023503283.1	1085000	8	-0.0716533			NW_023503283.1	1085000	25	-1.28597			NW_023503283.1	1085000	28	-1.51571
NW_023503283.1	1090000	5	-1.80482			NW_023503283.1	1090000	7	-1.44284			NW_023503283.1	1090000	10	-1.42291
NW_023503283.1	1095000	3	-1.29256			NW_023503283.1	1095000	10	-0.78846			NW_023503283.1	1095000	11	-1.17626
NW_023503283.1	1100000	6	-1.21961			NW_023503283.1	1100000	7	-0.617522			NW_023503283.1	1100000	9	-1.05698
NW_023503283.1	1105000	1	-0.845192			NW_023503283.1	1105000	6	-1.33477			NW_023503283.1	1105000	7	-1.63627
NW_023503283.1	1110000	0	nan			NW_023503283.1	1110000	3	-1.47718			NW_023503283.1	1110000	3	-1.48671
NW_023503283.1	1115000	2	0.376404			NW_023503283.1	1115000	9	-1.56223			NW_023503283.1	1115000	10	-1.4782
NW_023503283.1	1120000	0	nan			NW_023503283.1	1120000	7	-1.67851			NW_023503283.1	1120000	7	-1.80335
NW_023503283.1	1125000	2	2.23495			NW_023503283.1	1125000	8	-1.41164			NW_023503283.1	1125000	8	-0.715245
NW_023503283.1	1130000	5	-0.604928			NW_023503283.1	1130000	11	-1.42895			NW_023503283.1	1130000	14	-1.35456
NW_023503283.1	1135000	0	nan			NW_023503283.1	1135000	9	-1.04601			NW_023503283.1	1135000	9	-1.44643
NW_023503283.1	1140000	0	nan			NW_023503283.1	1140000	5	-1.76929			NW_023503283.1	1140000	5	-1.78138
NW_023503283.1	1145000	3	1.06448			NW_023503283.1	1145000	9	-1.58761			NW_023503283.1	1145000	9	-0.964366
NW_023503283.1	1150000	4	-0.493566			NW_023503283.1	1150000	10	-0.924166			NW_023503283.1	1150000	12	-1.19022
NW_023503283.1	1155000	2	0.33914			NW_023503283.1	1155000	6	-0.667063			NW_023503283.1	1155000	7	-0.792144
NW_023503283.1	1160000	3	-0.16965			NW_023503283.1	1160000	10	-1.1912			NW_023503283.1	1160000	11	-1.06531
NW_023503283.1	1165000	3	-1.40866			NW_023503283.1	1165000	9	-1.00636			NW_023503283.1	1165000	10	-1.36739
NW_023503283.1	1170000	2	-1.11882			NW_023503283.1	1170000	7	-0.269309			NW_023503283.1	1170000	8	-0.759476
NW_023503283.1	1175000	2	-1.48214			NW_023503283.1	1175000	4	-1.15783			NW_023503283.1	1175000	5	-1.49744
NW_023503283.1	1180000	2	0.558067			NW_023503283.1	1180000	6	-0.85799			NW_023503283.1	1180000	7	-0.796186
NW_023503283.1	1185000	9	-1.35934			NW_023503283.1	1185000	27	-2.26383			NW_023503283.1	1185000	30	-2.22538
NW_023503283.1	1190000	7	-1.16864			NW_023503283.1	1190000	17	-1.84048			NW_023503283.1	1190000	20	-0.867481
NW_023503283.1	1195000	0	nan			NW_023503283.1	1195000	5	-1.18233			NW_023503283.1	1195000	5	-1.37924
NW_023503283.1	1200000	1	-0.845192			NW_023503283.1	1200000	8	-1.24741			NW_023503283.1	1200000	9	-1.62274
NW_023503283.1	1205000	4	0.792067			NW_023503283.1	1205000	6	-1.11364			NW_023503283.1	1205000	6	0.268722
NW_023503283.1	1210000	10	-2.34888			NW_023503283.1	1210000	9	-1.52576			NW_023503283.1	1210000	18	-2.25766
NW_023503283.1	1215000	1	-1.11966			NW_023503283.1	1215000	12	-1.73593			NW_023503283.1	1215000	13	-2.01276
NW_023503283.1	1220000	3	-1.43248			NW_023503283.1	1220000	8	-1.17528			NW_023503283.1	1220000	10	-1.58159
NW_023503283.1	1225000	4	-0.567283			NW_023503283.1	1225000	8	-0.637405			NW_023503283.1	1225000	8	-0.690537
NW_023503283.1	1230000	1	1.12535			NW_023503283.1	1230000	16	-0.985152			NW_023503283.1	1230000	17	-1.3925
NW_023503283.1	1235000	3	2.58202			NW_023503283.1	1235000	10	-1.46918			NW_023503283.1	1235000	10	-0.633914
NW_023503283.1	1240000	1	-0.5848			NW_023503283.1	1240000	6	-1.49441			NW_023503283.1	1240000	6	-1.55019
NW_023503283.1	1245000	3	1.29049			NW_023503283.1	1245000	10	-1.36266			NW_023503283.1	1245000	10	-0.816505
NW_023503283.1	1250000	3	-1.57239			NW_023503283.1	1250000	6	-0.17734			NW_023503283.1	1250000	8	-0.527036
NW_023503283.1	1255000	0	nan			NW_023503283.1	1255000	10	-1.54068			NW_023503283.1	1255000	10	-1.79169
NW_023503283.1	1260000	0	nan			NW_023503283.1	1260000	6	-1.89676			NW_023503283.1	1260000	6	-1.90199
NW_023503283.1	1265000	1	-0.845192			NW_023503283.1	1265000	5	-0.391106			NW_023503283.1	1265000	5	-0.830621
NW_023503283.1	1270000	1	-0.845192			NW_023503283.1	1270000	5	-0.872241			NW_023503283.1	1270000	5	-0.981801
NW_023503283.1	1275000	1	-0.845192			NW_023503283.1	1275000	6	-0.512811			NW_023503283.1	1275000	6	-0.298534
NW_023503283.1	1280000	2	0.520803			NW_023503283.1	1280000	7	-1.07251			NW_023503283.1	1280000	8	-1.0636
NW_023503283.1	1285000	2	2.23495			NW_023503283.1	1285000	6	-1.10824			NW_023503283.1	1285000	6	-0.129788
NW_023503283.1	1290000	0	nan			NW_023503283.1	1290000	7	-1.04173			NW_023503283.1	1290000	7	-1.38229
NW_023503283.1	1295000	1	-0.845192			NW_023503283.1	1295000	5	-0.28405			NW_023503283.1	1295000	5	-0.434471
NW_023503283.1	1300000	1	-0.845192			NW_023503283.1	1300000	0	nan			NW_023503283.1	1300000	1	-0.911574
NW_023503283.1	1305000	18	0.46243			NW_023503283.1	1305000	23	-0.00652328			NW_023503283.1	1305000	23	0.383566
NW_023503283.1	1310000	5	0.524531			NW_023503283.1	1310000	14	-1.54869			NW_023503283.1	1310000	14	-1.10615
NW_023503283.1	1315000	2	-1.30048			NW_023503283.1	1315000	4	0.631785			NW_023503283.1	1315000	6	-0.755291
NW_023503283.1	1320000	0	nan			NW_023503283.1	1320000	2	-0.151165			NW_023503283.1	1320000	2	-0.542574
NW_023503283.1	1325000	1	-0.845192			NW_023503283.1	1325000	2	-1.44362			NW_023503283.1	1325000	3	-1.54624
NW_023503283.1	1330000	0	nan			NW_023503283.1	1330000	3	-1.47718			NW_023503283.1	1330000	3	-1.48671
NW_023503283.1	1335000	2	0.558067			NW_023503283.1	1335000	6	-0.99714			NW_023503283.1	1335000	6	-0.322263
NW_023503283.1	1340000	1	-0.845192			NW_023503283.1	1340000	5	-0.458785			NW_023503283.1	1340000	5	-0.817345
NW_023503283.1	1345000	5	-1.56417			NW_023503283.1	1345000	9	-0.85667			NW_023503283.1	1345000	11	-1.20957
NW_023503283.1	1350000	0	nan			NW_023503283.1	1350000	4	-0.653158			NW_023503283.1	1350000	4	-1.02706
NW_023503283.1	1355000	0	nan			NW_023503283.1	1355000	3	-1.28898			NW_023503283.1	1355000	3	-1.37125
NW_023503283.1	1360000	1	-0.845192			NW_023503283.1	1360000	2	-0.943751			NW_023503283.1	1360000	3	-1.31171
NW_023503283.1	1365000	7	-1.62489			NW_023503283.1	1365000	7	-1.31786			NW_023503283.1	1365000	9	-1.49354
NW_023503283.1	1370000	7	-1.71378			NW_023503283.1	1370000	7	-0.329675			NW_023503283.1	1370000	11	-1.12114
NW_023503283.1	1375000	4	-1.3133			NW_023503283.1	1375000	3	-1.20011			NW_023503283.1	1375000	5	-1.41692
NW_023503283.1	1380000	0	nan			NW_023503283.1	1380000	3	-1.21405			NW_023503283.1	1380000	3	-1.32013
NW_023503283.1	1385000	0	nan			NW_023503283.1	1385000	7	-1.83531			NW_023503283.1	1385000	7	-1.90069
NW_023503283.1	1390000	1	-1.11966			NW_023503283.1	1390000	9	-1.38699			NW_023503283.1	1390000	9	-1.63362
NW_023503283.1	1395000	2	-0.485328			NW_023503283.1	1395000	10	-1.43926			NW_023503283.1	1395000	10	-1.01993
NW_023503283.1	1400000	5	-1.80482			NW_023503283.1	1400000	4	0.035558			NW_023503283.1	1400000	7	-0.918123
NW_023503283.1	1405000	2	-0.485328			NW_023503283.1	1405000	5	-0.63475			NW_023503283.1	1405000	5	0.083308
NW_023503283.1	1410000	2	-1.48214			NW_023503283.1	1410000	3	-0.827199			NW_023503283.1	1410000	5	-1.53555
NW_023503283.1	1415000	1	-1.11966			NW_023503283.1	1415000	6	-1.38007			NW_023503283.1	1415000	7	-1.71206
NW_023503283.1	1420000	0	nan			NW_023503283.1	1420000	4	-1.10032			NW_023503283.1	1420000	4	-1.28677
NW_023503283.1	1425000	2	0.520803			NW_023503283.1	1425000	8	-0.158616			NW_023503283.1	1425000	8	-0.381532
NW_023503283.1	1430000	2	0.520803			NW_023503283.1	1430000	11	-1.82704			NW_023503283.1	1430000	12	-1.71217
NW_023503283.1	1435000	1	-1.11966			NW_023503283.1	1435000	2	-0.846929			NW_023503283.1	1435000	3	-1.32013
NW_023503283.1	1440000	2	-1.11882			NW_023503283.1	1440000	7	-0.536721			NW_023503283.1	1440000	7	-0.0770257
NW_023503283.1	1445000	1	1.68836			NW_023503283.1	1445000	7	-1.63523			NW_023503283.1	1445000	7	-1.19602
NW_023503283.1	1450000	0	nan			NW_023503283.1	1450000	7	-0.968621			NW_023503283.1	1450000	7	-1.3284
NW_023503283.1	1455000	1	-1.11966			NW_023503283.1	1455000	2	-1.44362			NW_023503283.1	1455000	3	-1.60577
NW_023503283.1	1460000	0	nan			NW_023503283.1	1460000	3	-1.38831			NW_023503283.1	1460000	3	-1.43078
NW_023503283.1	1465000	3	-0.0297345			NW_023503283.1	1465000	7	-1.04173			NW_023503283.1	1465000	8	-0.98917
NW_023503283.1	1470000	2	-1.11882			NW_023503283.1	1470000	4	0.801916			NW_023503283.1	1470000	4	0.468383
NW_023503283.1	1475000	1	-0.338482			NW_023503283.1	1475000	17	-2.35325			NW_023503283.1	1475000	17	-2.33878
NW_023503283.1	1480000	6	-1.35969			NW_023503283.1	1480000	8	-0.967365			NW_023503283.1	1480000	11	-1.45947
NW_023503283.1	1485000	1	-0.845192			NW_023503283.1	1485000	2	-0.322291			NW_023503283.1	1485000	3	-0.994201
NW_023503283.1	1490000	0	nan			NW_023503283.1	1490000	11	-1.38502			NW_023503283.1	1490000	11	-1.69339
NW_023503283.1	1495000	1	-1.11966			NW_023503283.1	1495000	6	-0.883878			NW_023503283.1	1495000	6	-1.21044
NW_023503283.1	1500000	5	-1.02753			NW_023503283.1	1500000	6	-0.766302			NW_023503283.1	1500000	7	-0.629448
NW_023503283.1	1505000	1	-0.845192			NW_023503283.1	1505000	5	-1.46289			NW_023503283.1	1505000	5	-0.796788
NW_023503283.1	1510000	3	-0.80465			NW_023503283.1	1510000	22	-2.16188			NW_023503283.1	1510000	22	-1.85937
NW_023503283.1	1515000	2	-1.11882			NW_023503283.1	1515000	7	-0.113479			NW_023503283.1	1515000	7	-0.626754
NW_023503283.1	1520000	0	nan			NW_023503283.1	1520000	3	-1.47718			NW_023503283.1	1520000	3	-1.48671
NW_023503283.1	1525000	2	0.376404			NW_023503283.1	1525000	5	-1.08635			NW_023503283.1	1525000	5	-0.587364
NW_023503283.1	1530000	4	1.16065			NW_023503283.1	1530000	5	0.1171			NW_023503283.1	1530000	5	0.915438
NW_023503283.1	1535000	1	-0.845192			NW_023503283.1	1535000	0	nan			NW_023503283.1	1535000	1	-0.911574
NW_023503283.1	1540000	1	-1.11966			NW_023503283.1	1540000	3	-1.37785			NW_023503283.1	1540000	4	-1.62674
NW_023503283.1	1545000	1	-0.845192			NW_023503283.1	1545000	2	-0.639776			NW_023503283.1	1545000	2	0.549232
NW_023503283.1	1550000	2	-0.629727			NW_023503283.1	1550000	7	-0.270271			NW_023503283.1	1550000	7	-0.0945416
NW_023503283.1	1555000	3	-1.43248			NW_023503283.1	1555000	10	-1.04601			NW_023503283.1	1555000	11	-1.0536
NW_023503283.1	1560000	3	-1.43248			NW_023503283.1	1560000	9	-0.867593			NW_023503283.1	1560000	11	-1.4927
NW_023503283.1	1565000	4	-1.64651			NW_023503283.1	1565000	5	-1.49612			NW_023503283.1	1565000	8	-1.87439
NW_023503283.1	1570000	3	-1.43248			NW_023503283.1	1570000	7	-0.0249825			NW_023503283.1	1570000	8	-0.568216
NW_023503283.1	1575000	0	nan			NW_023503283.1	1575000	4	-0.884647			NW_023503283.1	1575000	4	-1.17013
NW_023503283.1	1580000	0	nan			NW_023503283.1	1580000	3	-1.38134			NW_023503283.1	1580000	3	-1.42837
NW_023503283.1	1585000	3	-1.71231			NW_023503283.1	1585000	3	-0.99444			NW_023503283.1	1585000	5	-1.56795
NW_023503283.1	1590000	3	-0.944565			NW_023503283.1	1590000	12	-1.89147			NW_023503283.1	1590000	13	-1.93614
NW_023503283.1	1595000	7	-1.55097			NW_023503283.1	1595000	12	-0.844293			NW_023503283.1	1595000	17	-1.59257
NW_023503283.1	1600000	0	nan			NW_023503283.1	1600000	5	-0.859935			NW_023503283.1	1600000	5	-1.19508
NW_023503283.1	1605000	0	nan			NW_023503283.1	1605000	4	-1.52448			NW_023503283.1	1605000	4	-1.58038
NW_023503283.1	1610000	25	1.39392			NW_023503283.1	1610000	32	0.723203			NW_023503283.1	1610000	33	0.919664
NW_023503283.1	1615000	51	1.42182			NW_023503283.1	1615000	68	0.557889			NW_023503283.1	1615000	69	0.924321
NW_023503283.1	1620000	4	-1.41651			NW_023503283.1	1620000	5	0.258611			NW_023503283.1	1620000	8	-0.493176
NW_023503283.1	1625000	93	1.51305			NW_023503283.1	1625000	114	1.15467			NW_023503283.1	1625000	114	1.53943
NW_023503283.1	1630000	37	1.14145			NW_023503283.1	1630000	52	0.213242			NW_023503283.1	1630000	52	0.511991
NW_023503283.1	1635000	3	-1.02708			NW_023503283.1	1635000	11	-0.27727			NW_023503283.1	1635000	12	-0.904979
NW_023503283.1	1640000	1	-0.845192			NW_023503283.1	1640000	6	-1.38007			NW_023503283.1	1640000	7	-1.67871
NW_023503283.1	1645000	2	-0.666991			NW_023503283.1	1645000	3	-0.520508			NW_023503283.1	1645000	5	-1.1848
NW_023503283.1	1650000	1	-1.11966			NW_023503283.1	1650000	9	-1.6225			NW_023503283.1	1650000	10	-1.88968
NW_023503283.1	1655000	2	0.520803			NW_023503283.1	1655000	6	-0.928104			NW_023503283.1	1655000	6	-0.652221
NW_023503283.1	1660000	0	nan			NW_023503283.1	1660000	3	-0.269579			NW_023503283.1	1660000	3	-0.691122
NW_023503283.1	1665000	1	-0.338482			NW_023503283.1	1665000	5	-1.24873			NW_023503283.1	1665000	5	-1.30962
NW_023503283.1	1670000	1	-0.845192			NW_023503283.1	1670000	4	-0.298016			NW_023503283.1	1670000	4	-0.689591
NW_023503283.1	1675000	2	-1.11882			NW_023503283.1	1675000	5	-0.146232			NW_023503283.1	1675000	6	-0.857879
NW_023503283.1	1680000	1	-0.845192			NW_023503283.1	1680000	4	-1.0615			NW_023503283.1	1680000	5	-1.45076
NW_023503283.1	1685000	1	-0.845192			NW_023503283.1	1685000	4	-0.466241			NW_023503283.1	1685000	4	-0.802747
NW_023503283.1	1690000	4	1.71206			NW_023503283.1	1690000	5	-1.39521			NW_023503283.1	1690000	5	1.23664
NW_023503283.1	1695000	2	-1.10116			NW_023503283.1	1695000	9	-1.1483			NW_023503283.1	1695000	9	-0.951328
NW_023503283.1	1700000	5	-1.51051			NW_023503283.1	1700000	8	0.342765			NW_023503283.1	1700000	8	1.44474
NW_023503283.1	1705000	6	-1.84198			NW_023503283.1	1705000	4	1.79689			NW_023503283.1	1705000	9	-0.569342
NW_023503283.1	1710000	8	-1.14029			NW_023503283.1	1710000	13	-1.36186			NW_023503283.1	1710000	17	-1.47572
NW_023503283.1	1715000	4	0.30848			NW_023503283.1	1715000	2	0.434268			NW_023503283.1	1715000	4	1.02218
NW_023503283.1	1720000	1	-0.845192			NW_023503283.1	1720000	5	-1.10973			NW_023503283.1	1720000	6	-1.50461
NW_023503283.1	1725000	0	nan			NW_023503283.1	1725000	4	-0.683352			NW_023503283.1	1725000	4	-1.0166
NW_023503283.1	1730000	2	-1.48214			NW_023503283.1	1730000	7	-1.21776			NW_023503283.1	1730000	9	-1.72763
NW_023503283.1	1735000	1	-0.845192			NW_023503283.1	1735000	6	-0.701581			NW_023503283.1	1735000	6	-0.973891
NW_023503283.1	1740000	2	2.16042			NW_023503283.1	1740000	9	-2.06656			NW_023503283.1	1740000	9	-1.27486
NW_023503283.1	1745000	0	nan			NW_023503283.1	1745000	1	-1.08393			NW_023503283.1	1745000	1	-1.02565
NW_023503283.1	1750000	2	-1.11882			NW_023503283.1	1750000	3	-0.30443			NW_023503283.1	1750000	3	1.65173
NW_023503283.1	1755000	2	0.558067			NW_023503283.1	1755000	5	-0.600295			NW_023503283.1	1755000	5	-0.20449
NW_023503283.1	1760000	3	-0.0297345			NW_023503283.1	1760000	6	-1.2776			NW_023503283.1	1760000	8	-1.24388
NW_023503283.1	1765000	3	-0.655567			NW_023503283.1	1765000	11	-1.43098			NW_023503283.1	1765000	12	-1.59948
NW_023503283.1	1770000	1	-0.845192			NW_023503283.1	1770000	4	-1.0845			NW_023503283.1	1770000	4	-0.385019
NW_023503283.1	1775000	2	-1.11882			NW_023503283.1	1775000	3	-1.0154			NW_023503283.1	1775000	5	-1.53298
NW_023503283.1	1780000	2	-1.30048			NW_023503283.1	1780000	5	-1.01006			NW_023503283.1	1780000	6	-1.39764
NW_023503283.1	1785000	1	-0.845192			NW_023503283.1	1785000	8	0.21503			NW_023503283.1	1785000	8	-0.43949
NW_023503282.1	10000	1	-0.845192			NW_023503282.1	0	12	-2.05954			NW_023503282.1	0	12	-2.15661
NW_023503282.1	15000	0	nan			NW_023503282.1	5000	3	-0.675596			NW_023503282.1	5000	3	-0.957519
NW_023503282.1	20000	6	-1.16243			NW_023503282.1	10000	5	-0.632288			NW_023503282.1	10000	5	-0.967668
NW_023503282.1	25000	1	1.35055			NW_023503282.1	15000	2	-1.0721			NW_023503282.1	15000	2	-1.15068
NW_023503282.1	30000	0	nan			NW_023503282.1	20000	3	0.092875			NW_023503282.1	20000	8	-1.22039
NW_023503282.1	35000	0	nan			NW_023503282.1	25000	6	-1.26573			NW_023503282.1	25000	6	-0.769363
NW_023503282.1	40000	9	0.437293			NW_023503282.1	30000	3	-1.18965			NW_023503282.1	30000	3	-1.31171
NW_023503282.1	45000	3	-1.71231			NW_023503282.1	35000	11	-2.0129			NW_023503282.1	35000	11	-2.10552
NW_023503282.1	50000	2	-1.11882			NW_023503282.1	40000	11	-1.46004			NW_023503282.1	40000	15	-0.599172
NW_023503282.1	55000	0	nan			NW_023503282.1	45000	4	-1.14345			NW_023503282.1	45000	7	-1.80739
NW_023503282.1	60000	2	-1.30048			NW_023503282.1	50000	4	0.238291			NW_023503282.1	50000	4	0.568079
NW_023503282.1	65000	3	-1.42531			NW_023503282.1	55000	2	-1.31528			NW_023503282.1	55000	2	-1.29903
NW_023503282.1	70000	0	nan			NW_023503282.1	60000	4	0.479844			NW_023503282.1	60000	5	-0.222049
NW_023503282.1	75000	0	nan			NW_023503282.1	65000	12	-2.18364			NW_023503282.1	65000	13	-2.19265
NW_023503282.1	80000	1	-0.845192			NW_023503282.1	70000	5	-1.15649			NW_023503282.1	70000	5	-1.38823
NW_023503282.1	85000	1	-0.845192			NW_023503282.1	75000	8	-1.55327			NW_023503282.1	75000	8	-1.74292
NW_023503282.1	90000	0	nan			NW_023503282.1	80000	5	-1.10358			NW_023503282.1	80000	5	-1.27645
NW_023503282.1	95000	1	1.35055			NW_023503282.1	85000	10	-0.938028			NW_023503282.1	85000	10	-0.890055
NW_023503282.1	100000	1	-0.845192			NW_023503282.1	90000	5	-0.428022			NW_023503282.1	90000	5	-0.918845
NW_023503282.1	105000	0	nan			NW_023503282.1	95000	11	-1.56142			NW_023503282.1	95000	11	-1.33806
NW_023503282.1	110000	1	-0.845192			NW_023503282.1	100000	1	-0.0289689			NW_023503282.1	100000	2	-0.863239
NW_023503282.1	115000	3	-0.173237			NW_023503282.1	105000	6	-1.71231			NW_023503282.1	105000	6	-1.79012
NW_023503282.1	120000	0	nan			NW_023503282.1	110000	6	-1.41783			NW_023503282.1	110000	7	-1.70465
NW_023503282.1	125000	1	-0.845192			NW_023503282.1	115000	11	-0.884877			NW_023503282.1	115000	11	-0.634791
NW_023503282.1	130000	3	0.831283			NW_023503282.1	120000	5	-1.12573			NW_023503282.1	120000	5	-1.35954
NW_023503282.1	135000	2	-0.108029			NW_023503282.1	125000	3	-0.926526			NW_023503282.1	125000	3	-1.0393
NW_023503282.1	140000	2	-1.11882			NW_023503282.1	130000	11	-1.68173			NW_023503282.1	130000	12	-1.26215
NW_023503282.1	145000	0	nan			NW_023503282.1	135000	11	-0.724696			NW_023503282.1	135000	11	-0.875816
NW_023503282.1	150000	4	-1.3707			NW_023503282.1	140000	6	-0.771695			NW_023503282.1	140000	7	-0.699175
NW_023503282.1	155000	2	-1.48214			NW_023503282.1	145000	3	-1.5765			NW_023503282.1	145000	3	-1.54624
NW_023503282.1	160000	4	-1.13048			NW_023503282.1	150000	21	-1.65581			NW_023503282.1	150000	24	-2.06757
NW_023503282.1	165000	3	-1.43248			NW_023503282.1	155000	10	-1.66252			NW_023503282.1	155000	11	-1.92129
NW_023503282.1	170000	2	-1.30048			NW_023503282.1	160000	7	0.0750566			NW_023503282.1	160000	8	-0.590179
NW_023503282.1	175000	1	-0.845192			NW_023503282.1	165000	10	-1.0927			NW_023503282.1	165000	10	-0.733953
NW_023503282.1	180000	2	-1.30048			NW_023503282.1	170000	9	-0.553577			NW_023503282.1	170000	10	-1.01221
NW_023503282.1	185000	2	-1.11882			NW_023503282.1	175000	3	-0.222529			NW_023503282.1	175000	3	-0.115631
NW_023503282.1	190000	3	-1.43248			NW_023503282.1	180000	12	-1.49287			NW_023503282.1	180000	13	-1.8161
NW_023503282.1	195000	3	-0.431543			NW_023503282.1	185000	9	-0.672523			NW_023503282.1	185000	10	-0.845308
NW_023503282.1	200000	2	-1.30048			NW_023503282.1	190000	10	-0.560825			NW_023503282.1	190000	11	-1.17316
NW_023503282.1	205000	1	0.111926			NW_023503282.1	195000	11	-0.486789			NW_023503282.1	195000	12	-1.00296
NW_023503282.1	210000	0	nan			NW_023503282.1	200000	2	-0.151165			NW_023503282.1	200000	4	-1.18807
NW_023503282.1	215000	1	-0.845192			NW_023503282.1	205000	4	-1.14345			NW_023503282.1	205000	4	-1.09237
NW_023503282.1	220000	2	-1.48214			NW_023503282.1	210000	2	-0.450636			NW_023503282.1	210000	2	-0.7427
NW_023503282.1	225000	2	-1.30048			NW_023503282.1	215000	2	-1.31528			NW_023503282.1	215000	3	-1.48671
NW_023503282.1	230000	1	-0.845192			NW_023503282.1	220000	9	-1.22284			NW_023503282.1	220000	11	-1.74541
NW_023503282.1	235000	4	-1.53151			NW_023503282.1	225000	7	-1.28605			NW_023503282.1	225000	9	-1.73154
NW_023503282.1	240000	1	-1.11966			NW_023503282.1	230000	6	-1.03274			NW_023503282.1	230000	6	-0.669924
NW_023503282.1	245000	5	-0.921881			NW_023503282.1	235000	4	-0.354091			NW_023503282.1	235000	7	-0.780354
NW_023503282.1	250000	0	nan			NW_023503282.1	240000	4	-0.98817			NW_023503282.1	240000	5	-1.45333
NW_023503282.1	255000	7	-1.58032			NW_023503282.1	245000	6	-1.53432			NW_023503282.1	245000	9	-1.01793
NW_023503282.1	260000	2	-1.30048			NW_023503282.1	250000	3	-1.5765			NW_023503282.1	250000	3	-1.54624
NW_023503282.1	265000	1	-1.11966			NW_023503282.1	255000	12	-1.68178			NW_023503282.1	255000	14	-1.63835
NW_023503282.1	270000	1	-0.845192			NW_023503282.1	260000	3	-1.18965			NW_023503282.1	260000	5	-1.65419
NW_023503282.1	275000	0	nan			NW_023503282.1	265000	4	-0.365594			NW_023503282.1	265000	5	-1.106
NW_023503282.1	280000	2	-0.946471			NW_023503282.1	270000	20	-1.69624			NW_023503282.1	270000	20	-1.96055
NW_023503282.1	285000	3	-0.915865			NW_023503282.1	275000	6	-1.19346			NW_023503282.1	275000	6	-1.46657
NW_023503282.1	290000	2	-1.11882			NW_023503282.1	280000	3	-1.11472			NW_023503282.1	280000	5	-1.53384
NW_023503282.1	295000	1	-0.845192			NW_023503282.1	285000	10	-0.666617			NW_023503282.1	285000	10	-0.795674
NW_023503282.1	300000	1	-0.338482			NW_023503282.1	290000	5	0.616693			NW_023503282.1	290000	5	0.26104
NW_023503282.1	305000	0	nan			NW_023503282.1	295000	7	-1.79394			NW_023503282.1	295000	8	-1.93662
NW_023503282.1	310000	2	-1.30048			NW_023503282.1	300000	5	-0.426791			NW_023503282.1	300000	5	-0.778801
NW_023503282.1	315000	1	-1.11966			NW_023503282.1	305000	4	-1.22541			NW_023503282.1	305000	4	-1.39295
NW_023503282.1	320000	0	nan			NW_023503282.1	310000	3	-1.11472			NW_023503282.1	310000	5	-1.61778
NW_023503282.1	325000	0	nan			NW_023503282.1	315000	15	-1.71356			NW_023503282.1	315000	16	-2.02674
NW_023503282.1	330000	3	-1.43248			NW_023503282.1	320000	3	-0.57627			NW_023503282.1	320000	3	-0.897985
NW_023503282.1	335000	0	nan			NW_023503282.1	325000	5	-1.50596			NW_023503282.1	325000	5	-1.61778
NW_023503282.1	340000	0	nan			NW_023503282.1	330000	2	-1.31528			NW_023503282.1	330000	5	-1.77881
NW_023503282.1	345000	1	-0.845192			NW_023503282.1	335000	5	-0.602756			NW_023503282.1	335000	5	-1.01563
NW_023503282.1	350000	3	-1.57239			NW_023503282.1	340000	12	-1.66352			NW_023503282.1	340000	12	-1.89499
NW_023503282.1	355000	4	-1.04497			NW_023503282.1	345000	6	-1.5052			NW_023503282.1	345000	6	-0.961461
NW_023503282.1	360000	1	-0.845192			NW_023503282.1	350000	4	-1.44252			NW_023503282.1	350000	6	-1.75358
NW_023503282.1	365000	0	nan			NW_023503282.1	355000	9	-0.724859			NW_023503282.1	355000	10	-1.10916
NW_023503282.1	370000	4	-1.64651			NW_023503282.1	360000	4	-1.52448			NW_023503282.1	360000	5	-1.69658
NW_023503282.1	375000	0	nan			NW_023503282.1	365000	2	-0.957261			NW_023503282.1	365000	2	-1.07882
NW_023503282.1	380000	1	1.24499			NW_023503282.1	370000	5	-1.32507			NW_023503282.1	370000	7	-0.405785
NW_023503282.1	385000	0	nan			NW_023503282.1	375000	4	-0.20312			NW_023503282.1	375000	4	-0.724485
NW_023503282.1	390000	1	-1.11966			NW_023503282.1	380000	7	-1.62753			NW_023503282.1	380000	8	-1.55349
NW_023503282.1	395000	0	nan			NW_023503282.1	385000	0	nan			NW_023503282.1	385000	0	nan
NW_023503282.1	400000	1	-0.845192			NW_023503282.1	390000	4	-1.4454			NW_023503282.1	390000	5	-1.69744
NW_023503282.1	405000	1	-1.11966			NW_023503282.1	395000	5	-1.56133			NW_023503282.1	395000	5	-1.65504
NW_023503282.1	410000	12	-2.37696			NW_023503282.1	400000	5	-0.986679			NW_023503282.1	400000	5	-0.505136
NW_023503282.1	415000	1	-0.845192			NW_023503282.1	405000	3	-0.774922			NW_023503282.1	405000	4	-1.28677
NW_023503282.1	420000	6	-1.34057			NW_023503282.1	410000	7	-1.38224			NW_023503282.1	410000	18	-2.29671
NW_023503282.1	425000	2	-1.11882			NW_023503282.1	415000	2	-0.27951			NW_023503282.1	415000	3	-0.957519
NW_023503282.1	430000	3	-1.43248			NW_023503282.1	420000	11	0.120818			NW_023503282.1	420000	11	-0.154889
NW_023503282.1	435000	0	nan			NW_023503282.1	425000	7	-0.884934			NW_023503282.1	425000	7	-1.15156
NW_023503282.1	440000	1	-0.845192			NW_023503282.1	430000	10	-0.869446			NW_023503282.1	430000	12	-1.10539
NW_023503282.1	445000	2	0.520803			NW_023503282.1	435000	6	-1.89029			NW_023503282.1	435000	6	-1.89973
NW_023503282.1	450000	0	nan			NW_023503282.1	440000	5	-0.808253			NW_023503282.1	440000	5	-0.760813
NW_023503282.1	455000	1	-0.845192			NW_023503282.1	445000	7	-0.958039			NW_023503282.1	445000	7	-0.413195
NW_023503282.1	460000	2	-1.30048			NW_023503282.1	450000	4	-0.920592			NW_023503282.1	450000	4	-1.16165
NW_023503282.1	465000	8	-1.64015			NW_023503282.1	455000	5	-1.39275			NW_023503282.1	455000	6	-1.65452
NW_023503282.1	470000	2	0.334482			NW_023503282.1	460000	7	-1.68428			NW_023503282.1	460000	8	-1.85274
NW_023503282.1	475000	6	-1.88247			NW_023503282.1	465000	9	-1.43615			NW_023503282.1	465000	12	-1.29933
NW_023503282.1	480000	3	-0.173237			NW_023503282.1	470000	2	-0.846929			NW_023503282.1	470000	3	-0.536575
NW_023503282.1	485000	3	-1.57239			NW_023503282.1	475000	12	-1.01809			NW_023503282.1	475000	16	-1.57736
NW_023503282.1	490000	0	nan			NW_023503282.1	480000	9	-1.36003			NW_023503282.1	480000	9	-0.441015
NW_023503282.1	495000	5	-1.51051			NW_023503282.1	485000	8	-1.43857			NW_023503282.1	485000	10	-1.82641
NW_023503282.1	500000	1	-0.845192			NW_023503282.1	490000	7	-1.27162			NW_023503282.1	490000	7	-1.53354
NW_023503282.1	505000	0	nan			NW_023503282.1	495000	13	-1.25064			NW_023503282.1	495000	13	-1.45159
NW_023503282.1	510000	3	-1.43248			NW_023503282.1	500000	8	-0.761665			NW_023503282.1	500000	8	-1.17158
NW_023503282.1	515000	6	-0.964508			NW_023503282.1	505000	2	-0.612756			NW_023503282.1	505000	2	-0.863239
NW_023503282.1	520000	5	-0.137045			NW_023503282.1	510000	11	-1.34727			NW_023503282.1	510000	13	-1.43658
NW_023503282.1	525000	3	-1.43248			NW_023503282.1	515000	8	-1.44379			NW_023503282.1	515000	10	-1.45352
NW_023503282.1	530000	4	-1.64651			NW_023503282.1	520000	5	-1.56626			NW_023503282.1	520000	9	-1.39342
NW_023503282.1	535000	1	-0.845192			NW_023503282.1	525000	10	-0.519968			NW_023503282.1	525000	10	-0.912172
NW_023503282.1	540000	2	-1.30048			NW_023503282.1	530000	8	-0.679984			NW_023503282.1	530000	10	-0.618998
NW_023503282.1	545000	1	-0.845192			NW_023503282.1	535000	3	-1.21405			NW_023503282.1	535000	4	-1.48866
NW_023503282.1	550000	2	-1.48214			NW_023503282.1	540000	4	-1.44252			NW_023503282.1	540000	6	-1.79012
NW_023503282.1	555000	2	-1.11882			NW_023503282.1	545000	9	-1.50911			NW_023503282.1	545000	9	-1.70085
NW_023503282.1	560000	2	-0.22448			NW_023503282.1	550000	10	-1.77123			NW_023503282.1	550000	12	-2.07424
NW_023503282.1	565000	0	nan			NW_023503282.1	555000	11	-1.48099			NW_023503282.1	555000	12	-1.60885
NW_023503282.1	570000	1	-0.845192			NW_023503282.1	560000	4	-1.36344			NW_023503282.1	560000	6	-1.50838
NW_023503282.1	575000	5	-0.921881			NW_023503282.1	565000	4	-1.76172			NW_023503282.1	565000	4	-1.72544
NW_023503282.1	580000	1	1.35055			NW_023503282.1	570000	7	-0.77239			NW_023503282.1	570000	7	-0.903976
NW_023503282.1	585000	11	-2.33703			NW_023503282.1	575000	24	-1.17401			NW_023503282.1	575000	25	-1.53818
NW_023503282.1	590000	4	0.166943			NW_023503282.1	580000	10	-0.865068			NW_023503282.1	580000	10	-1.0495
NW_023503282.1	595000	5	-0.340801			NW_023503282.1	585000	28	0.115895			NW_023503282.1	585000	29	-0.691935
NW_023503282.1	600000	1	1.35055			NW_023503282.1	590000	19	-1.45659			NW_023503282.1	590000	19	-0.913249
NW_023503282.1	605000	2	2.01137			NW_023503282.1	595000	12	-1.13269			NW_023503282.1	595000	14	-1.14034
NW_023503282.1	610000	2	-1.48214			NW_023503282.1	600000	6	-1.41351			NW_023503282.1	600000	6	-1.17428
NW_023503282.1	615000	1	-0.845192			NW_023503282.1	605000	9	-2.04994			NW_023503282.1	605000	9	-1.30659
NW_023503282.1	620000	4	-1.8765			NW_023503282.1	610000	3	-0.431637			NW_023503282.1	610000	5	-1.3484
NW_023503282.1	625000	2	-1.30048			NW_023503282.1	615000	6	-0.882073			NW_023503282.1	615000	7	-1.38082
NW_023503282.1	630000	1	-1.11966			NW_023503282.1	620000	10	-2.18127			NW_023503282.1	620000	14	-2.37358
NW_023503282.1	635000	1	-0.845192			NW_023503282.1	625000	5	-0.632288			NW_023503282.1	625000	6	-0.903078
NW_023503282.1	640000	2	-1.30048			NW_023503282.1	630000	7	-1.06962			NW_023503282.1	630000	8	-1.54495
NW_023503282.1	645000	2	-1.48214			NW_023503282.1	635000	8	-0.812933			NW_023503282.1	635000	8	-0.981544
NW_023503282.1	650000	5	-0.899242			NW_023503282.1	640000	22	-0.894407			NW_023503282.1	640000	22	-1.12838
NW_023503282.1	655000	65	1.91639			NW_023503282.1	645000	15	-0.655715			NW_023503282.1	645000	16	-1.2952
NW_023503282.1	660000	47	0.922513			NW_023503282.1	650000	10	-1.64282			NW_023503282.1	650000	13	-1.34888
NW_023503282.1	665000	0	nan			NW_023503282.1	655000	73	1.84925			NW_023503282.1	655000	74	2.13737
NW_023503282.1	670000	2	-1.30048			NW_023503282.1	660000	72	0.968798			NW_023503282.1	660000	75	0.864839
NW_023503282.1	675000	1	-0.845192			NW_023503282.1	665000	10	-1.46772			NW_023503282.1	665000	10	-1.72277
NW_023503282.1	680000	0	nan			NW_023503282.1	670000	9	-1.58285			NW_023503282.1	670000	10	-1.80172
NW_023503282.1	685000	26	-2.479			NW_023503282.1	675000	6	-1.70799			NW_023503282.1	675000	6	-0.914755
NW_023503282.1	690000	3	0.590916			NW_023503282.1	680000	6	-1.09099			NW_023503282.1	680000	6	-1.32004
NW_023503282.1	695000	2	-0.946471			NW_023503282.1	685000	6	-0.624994			NW_023503282.1	685000	31	-2.22683
NW_023503282.1	700000	9	-1.79967			NW_023503282.1	690000	14	-1.5437			NW_023503282.1	690000	14	-0.986064
NW_023503282.1	705000	2	-1.48214			NW_023503282.1	695000	5	-0.537538			NW_023503282.1	695000	5	-0.669592
NW_023503282.1	710000	8	-1.76363			NW_023503282.1	700000	28	0.323486			NW_023503282.1	700000	29	-0.00713168
NW_023503282.1	715000	26	-2.04925			NW_023503282.1	705000	18	2.3623			NW_023503282.1	705000	20	1.3533
NW_023503282.1	720000	11	-1.80435			NW_023503282.1	710000	12	0.364081			NW_023503282.1	710000	14	-0.495915
NW_023503282.1	725000	2	-1.11882			NW_023503282.1	715000	31	-0.191185			NW_023503282.1	715000	31	-0.422484
NW_023503282.1	730000	5	-1.60861			NW_023503282.1	720000	26	2.03105			NW_023503282.1	720000	27	0.838704
NW_023503282.1	735000	1	-0.845192			NW_023503282.1	725000	16	-0.680555			NW_023503282.1	725000	17	-1.22975
NW_023503282.1	740000	10	-1.60635			NW_023503282.1	730000	5	0.00512283			NW_023503282.1	730000	8	-1.06573
NW_023503282.1	745000	2	-1.11882			NW_023503282.1	735000	8	-0.766878			NW_023503282.1	735000	8	-0.879966
NW_023503282.1	750000	0	nan			NW_023503282.1	740000	19	0.160324			NW_023503282.1	740000	20	-0.502471
NW_023503282.1	755000	0	nan			NW_023503282.1	745000	3	0.662694			NW_023503282.1	745000	3	0.716635
NW_023503282.1	760000	0	nan			NW_023503282.1	750000	7	-1.29663			NW_023503282.1	750000	7	-1.54229
NW_023503282.1	765000	1	-0.845192			NW_023503282.1	755000	6	-1.22366			NW_023503282.1	755000	6	-1.47711
NW_023503282.1	770000	2	-1.11882			NW_023503282.1	760000	1	-0.18789			NW_023503282.1	760000	1	-0.478312
NW_023503282.1	775000	2	-1.11882			NW_023503282.1	765000	8	-0.498374			NW_023503282.1	765000	8	-0.768627
NW_023503282.1	780000	1	-0.845192			NW_023503282.1	770000	8	0.31409			NW_023503282.1	770000	8	-0.0850342
NW_023503282.1	785000	3	-1.17417			NW_023503282.1	775000	15	-0.897389			NW_023503282.1	775000	15	-0.992362
NW_023503282.1	790000	2	-1.11882			NW_023503282.1	780000	6	-1.19346			NW_023503282.1	780000	6	-0.652974
NW_023503282.1	795000	1	-0.845192			NW_023503282.1	785000	9	-1.11579			NW_023503282.1	785000	11	-1.59364
NW_023503282.1	800000	2	-1.11882			NW_023503282.1	790000	3	-1.46997			NW_023503282.1	790000	5	-1.73374
NW_023503282.1	805000	0	nan			NW_023503282.1	795000	6	-1.33261			NW_023503282.1	795000	7	-1.6356
NW_023503282.1	810000	2	-1.30048			NW_023503282.1	800000	7	0.101028			NW_023503282.1	800000	7	-0.118457
NW_023503282.1	815000	2	-1.11882			NW_023503282.1	805000	7	-1.54096			NW_023503282.1	805000	7	-1.68444
NW_023503282.1	820000	1	-0.845192			NW_023503282.1	810000	4	-0.867393			NW_023503282.1	810000	5	-0.593359
NW_023503282.1	825000	0	nan			NW_023503282.1	815000	8	-1.39339			NW_023503282.1	815000	9	-1.11389
NW_023503282.1	830000	2	-1.11882			NW_023503282.1	820000	6	-2.01326			NW_023503282.1	820000	7	-2.03206
NW_023503282.1	835000	1	-0.845192			NW_023503282.1	825000	4	-1.21391			NW_023503282.1	825000	4	-1.38896
NW_023503282.1	840000	2	-1.30048			NW_023503282.1	830000	7	-0.288547			NW_023503282.1	830000	7	0.0408694
NW_023503282.1	845000	8	-2.17642			NW_023503282.1	835000	12	-1.34804			NW_023503282.1	835000	12	-1.19958
NW_023503282.1	850000	1	-0.845192			NW_023503282.1	840000	5	-1.69423			NW_023503282.1	840000	6	-1.79012
NW_023503282.1	855000	1	-1.11966			NW_023503282.1	845000	10	-1.66836			NW_023503282.1	845000	18	-2.27774
NW_023503282.1	860000	0	nan			NW_023503282.1	850000	5	-0.549843			NW_023503282.1	850000	5	-0.598927
NW_023503282.1	865000	3	-0.915865			NW_023503282.1	855000	4	-0.441798			NW_023503282.1	855000	5	-1.14668
NW_023503282.1	870000	1	-0.845192			NW_023503282.1	860000	4	-0.775373			NW_023503282.1	860000	4	-1.09037
NW_023503282.1	875000	6	-1.67045			NW_023503282.1	865000	9	-1.56699			NW_023503282.1	865000	9	-1.56248
NW_023503282.1	880000	2	-1.48214			NW_023503282.1	870000	6	-0.149294			NW_023503282.1	870000	6	-0.499295
NW_023503282.1	885000	2	-1.30048			NW_023503282.1	875000	12	0.524652			NW_023503282.1	875000	13	0.171345
NW_023503282.1	890000	0	nan			NW_023503282.1	880000	5	-0.79964			NW_023503282.1	880000	6	-1.31552
NW_023503282.1	895000	2	-1.11882			NW_023503282.1	885000	4	-1.16646			NW_023503282.1	885000	5	-0.754389
NW_023503282.1	900000	0	nan			NW_023503282.1	890000	3	0.148637			NW_023503282.1	890000	3	-0.445772
NW_023503282.1	905000	2	-1.48214			NW_023503282.1	895000	7	-0.708904			NW_023503282.1	895000	8	-0.749409
NW_023503282.1	910000	4	-1.64651			NW_023503282.1	900000	5	-1.56133			NW_023503282.1	900000	5	-1.65504
NW_023503282.1	915000	0	nan			NW_023503282.1	905000	7	-1.53904			NW_023503282.1	905000	9	-1.91454
NW_023503282.1	920000	2	-1.11882			NW_023503282.1	910000	8	-1.57847			NW_023503282.1	910000	10	-1.4224
NW_023503282.1	925000	2	-1.30048			NW_023503282.1	915000	4	-1.46265			NW_023503282.1	915000	4	-1.53801
NW_023503282.1	930000	1	-0.845192			NW_023503282.1	920000	7	-1.338			NW_023503282.1	920000	8	-0.956226
NW_023503282.1	935000	2	-1.30048			NW_023503282.1	925000	6	-0.815921			NW_023503282.1	925000	7	-0.76048
NW_023503282.1	940000	2	-1.11882			NW_023503282.1	930000	9	-0.915171			NW_023503282.1	930000	9	-1.28044
NW_023503282.1	945000	1	-1.11966			NW_023503282.1	935000	10	-1.08687			NW_023503282.1	935000	11	-1.48315
NW_023503282.1	950000	0	nan			NW_023503282.1	940000	8	-1.73836			NW_023503282.1	940000	10	-1.98509
NW_023503282.1	955000	0	nan			NW_023503282.1	945000	8	-1.56978			NW_023503282.1	945000	9	-1.85875
NW_023503282.1	960000	0	nan			NW_023503282.1	950000	3	-1.47718			NW_023503282.1	950000	3	-1.48671
NW_023503281.1	5000	3	-1.43248			NW_023503282.1	955000	8	-1.8435			NW_023503282.1	955000	8	-1.92167
NW_023503281.1	10000	2	-1.30048			NW_023503282.1	960000	6	-1.66637			NW_023503282.1	960000	6	-1.7745
NW_023503281.1	15000	9	-2.11304			NW_023503281.1	0	8	-0.61742			NW_023503281.1	0	8	-1.11973
NW_023503281.1	20000	2	-1.11882			NW_023503281.1	5000	7	-0.795476			NW_023503281.1	5000	7	-0.51088
NW_023503281.1	25000	1	-0.845192			NW_023503281.1	10000	6	-0.704817			NW_023503281.1	10000	7	-1.00402
NW_023503281.1	30000	1	-0.845192			NW_023503281.1	15000	6	-0.55674			NW_023503281.1	15000	14	-1.71883
NW_023503281.1	35000	0	nan			NW_023503281.1	20000	7	0.270325			NW_023503281.1	20000	7	0.0998169
NW_023503281.1	40000	1	-0.845192			NW_023503281.1	25000	2	-1.18693			NW_023503281.1	25000	3	-1.42717
NW_023503281.1	45000	1	-0.845192			NW_023503281.1	30000	3	-1.21405			NW_023503281.1	30000	3	-1.21429
NW_023503281.1	50000	1	0.506034			NW_023503281.1	35000	5	-1.50842			NW_023503281.1	35000	5	-1.61864
NW_023503281.1	55000	1	-0.338482			NW_023503281.1	40000	2	-1.18693			NW_023503281.1	40000	3	-1.42717
NW_023503281.1	60000	0	nan			NW_023503281.1	45000	8	-1.32561			NW_023503281.1	45000	9	-1.69471
NW_023503281.1	65000	2	-1.11882			NW_023503281.1	50000	5	0.272146			NW_023503281.1	50000	5	-0.180935
NW_023503281.1	70000	0	nan			NW_023503281.1	55000	4	-0.653158			NW_023503281.1	55000	5	-1.13898
NW_023503281.1	75000	15	-0.81954			NW_023503281.1	60000	5	-0.666743			NW_023503281.1	60000	5	-1.07388
NW_023503281.1	80000	0	nan			NW_023503281.1	65000	3	-1.37785			NW_023503281.1	65000	5	-1.69401
NW_023503281.1	85000	2	-1.11882			NW_023503281.1	70000	5	-0.923923			NW_023503281.1	70000	5	-1.25332
NW_023503281.1	90000	2	-0.783441			NW_023503281.1	75000	31	-0.0184531			NW_023503281.1	75000	31	-0.160693
NW_023503281.1	95000	2	-1.11882			NW_023503281.1	80000	4	-1.44252			NW_023503281.1	80000	4	-1.53103
NW_023503281.1	100000	3	-0.783125			NW_023503281.1	85000	6	-0.182734			NW_023503281.1	85000	6	-0.663897
NW_023503281.1	105000	2	-0.783441			NW_023503281.1	90000	10	-1.19996			NW_023503281.1	90000	11	-1.5619
NW_023503281.1	110000	1	-0.845192			NW_023503281.1	95000	8	-0.804013			NW_023503281.1	95000	8	-1.15046
NW_023503281.1	115000	1	-0.845192			NW_023503281.1	100000	7	-1.24084			NW_023503281.1	100000	8	-0.891179
NW_023503281.1	120000	1	-0.845192			NW_023503281.1	105000	10	-1.19777			NW_023503281.1	105000	11	-1.55307
NW_023503281.1	125000	3	-1.29256			NW_023503281.1	110000	4	-1.0615			NW_023503281.1	110000	4	-0.217529
NW_023503281.1	130000	1	-1.11966			NW_023503281.1	115000	8	-1.83916			NW_023503281.1	115000	9	-1.98847
NW_023503281.1	135000	3	-1.29256			NW_023503281.1	120000	4	-0.999672			NW_023503281.1	120000	4	-1.16415
NW_023503281.1	140000	1	-0.845192			NW_023503281.1	125000	4	-0.400101			NW_023503281.1	125000	6	-1.17616
NW_023503281.1	145000	47	2.20988			NW_023503281.1	130000	6	-0.717761			NW_023503281.1	130000	7	-1.33547
NW_023503281.1	150000	3	-1.43248			NW_023503281.1	135000	4	-0.263509			NW_023503281.1	135000	6	-0.824732
NW_023503281.1	155000	39	2.25244			NW_023503281.1	140000	6	-1.02626			NW_023503281.1	140000	6	-0.515492
NW_023503281.1	160000	0	nan			NW_023503281.1	145000	48	2.22337			NW_023503281.1	145000	49	2.61817
NW_023503281.1	165000	3	-1.43248			NW_023503281.1	150000	7	-1.00421			NW_023503281.1	150000	9	-1.52984
NW_023503281.1	170000	1	-0.845192			NW_023503281.1	155000	43	1.91387			NW_023503281.1	155000	44	2.26776
NW_023503281.1	175000	1	-0.845192			NW_023503281.1	160000	4	-1.0845			NW_023503281.1	160000	4	-1.30223
NW_023503281.1	180000	0	nan			NW_023503281.1	165000	6	-0.528991			NW_023503281.1	165000	7	-0.847386
NW_023503281.1	185000	1	-0.845192			NW_023503281.1	170000	6	-0.576453			NW_023503281.1	170000	6	-0.69516
NW_023503281.1	190000	2	-1.11882			NW_023503281.1	175000	7	-0.718523			NW_023503281.1	175000	7	-0.856818
NW_023503281.1	195000	2	-1.48214			NW_023503281.1	180000	6	-1.13845			NW_023503281.1	180000	6	-1.3999
NW_023503281.1	200000	1	-0.845192			NW_023503281.1	185000	6	-0.620679			NW_023503281.1	185000	7	-1.21522
NW_023503281.1	205000	1	-1.11966			NW_023503281.1	190000	8	-0.640881			NW_023503281.1	190000	8	-0.211015
NW_023503281.1	210000	3	-1.43248			NW_023503281.1	195000	4	-1.22541			NW_023503281.1	195000	6	-1.72307
NW_023503281.1	215000	0	nan			NW_023503281.1	200000	3	-0.368905			NW_023503281.1	200000	4	-1.0166
NW_023503281.1	220000	0	nan			NW_023503281.1	205000	4	-1.28724			NW_023503281.1	205000	5	-1.61436
NW_023503281.1	225000	0	nan			NW_023503281.1	210000	5	-0.808919			NW_023503281.1	210000	7	-0.789222
NW_023503281.1	230000	1	-0.845192			NW_023503281.1	215000	5	-0.760263			NW_023503281.1	215000	5	-1.1424
NW_023503281.1	235000	3	-1.57239			NW_023503281.1	220000	1	-1.08393			NW_023503281.1	220000	1	-1.02565
NW_023503281.1	240000	0	nan			NW_023503281.1	225000	3	-1.5765			NW_023503281.1	225000	3	-1.54624
NW_023503281.1	245000	2	-1.11882			NW_023503281.1	230000	6	-0.369346			NW_023503281.1	230000	7	-1.066
NW_023503281.1	250000	2	-1.11882			NW_023503281.1	235000	3	-0.752269			NW_023503281.1	235000	5	-1.41521
NW_023503281.1	255000	1	-0.845192			NW_023503281.1	240000	4	-1.14345			NW_023503281.1	240000	4	-1.3436
NW_023503281.1	260000	2	-1.11882			NW_023503281.1	245000	5	0.0248112			NW_023503281.1	245000	5	0.550979
NW_023503281.1	265000	0	nan			NW_023503281.1	250000	9	-1.84057			NW_023503281.1	250000	10	-1.45506
NW_023503281.1	270000	3	-1.56522			NW_023503281.1	255000	6	-0.853675			NW_023503281.1	255000	6	-0.544118
NW_023503281.1	275000	0	nan			NW_023503281.1	260000	7	-0.872429			NW_023503281.1	260000	8	-1.33447
NW_023503281.1	280000	1	-0.845192			NW_023503281.1	265000	2	-0.718584			NW_023503281.1	265000	2	-0.932008
NW_023503281.1	285000	2	-1.11882			NW_023503281.1	270000	3	-1.5765			NW_023503281.1	270000	6	-1.93627
NW_023503281.1	290000	17	-2.48243			NW_023503281.1	275000	5	-0.841478			NW_023503281.1	275000	5	-1.17067
NW_023503281.1	295000	6	-2.09929			NW_023503281.1	280000	6	-0.283051			NW_023503281.1	280000	6	-0.781039
NW_023503281.1	300000	1	-0.845192			NW_023503281.1	285000	6	-0.957229			NW_023503281.1	285000	7	-1.35939
NW_023503281.1	305000	0	nan			NW_023503281.1	290000	6	-0.430831			NW_023503281.1	290000	21	-1.82633
NW_023503281.1	310000	2	-1.11882			NW_023503281.1	295000	8	-1.2309			NW_023503281.1	295000	13	-1.96244
NW_023503281.1	315000	2	-1.30048			NW_023503281.1	300000	5	-1.30292			NW_023503281.1	300000	6	-1.61121
NW_023503281.1	320000	0	nan			NW_023503281.1	305000	3	-1.0154			NW_023503281.1	305000	3	-1.20106
NW_023503281.1	325000	1	-0.845192			NW_023503281.1	310000	5	-1.69177			NW_023503281.1	310000	6	-0.951291
NW_023503281.1	330000	20	0.993519			NW_023503281.1	315000	6	-0.567824			NW_023503281.1	315000	7	-1.1721
NW_023503281.1	335000	1	0.681974			NW_023503281.1	320000	7	-1.43515			NW_023503281.1	320000	7	-1.64739
NW_023503281.1	340000	2	-1.11882			NW_023503281.1	325000	9	-1.19478			NW_023503281.1	325000	9	-1.49442
NW_023503281.1	345000	18	0.55145			NW_023503281.1	330000	25	0.260354			NW_023503281.1	330000	27	0.393528
NW_023503281.1	350000	2	-1.30048			NW_023503281.1	335000	2	0.00194826			NW_023503281.1	335000	3	-0.423522
NW_023503281.1	355000	1	-1.11966			NW_023503281.1	340000	9	-0.815264			NW_023503281.1	340000	9	-0.760084
NW_023503281.1	360000	0	nan			NW_023503281.1	345000	24	0.299427			NW_023503281.1	345000	25	0.302885
NW_023503281.1	365000	2	-1.11882			NW_023503281.1	350000	5	-0.922692			NW_023503281.1	350000	7	-1.53758
NW_023503281.1	370000	1	0.681974			NW_023503281.1	355000	3	-0.196391			NW_023503281.1	355000	3	-0.144496
NW_023503281.1	375000	2	-1.47284			NW_023503281.1	360000	7	-0.630027			NW_023503281.1	360000	7	-1.09665
NW_023503281.1	380000	0	nan			NW_023503281.1	365000	10	-1.1197			NW_023503281.1	365000	11	-1.53088
NW_023503281.1	385000	0	nan			NW_023503281.1	370000	7	-0.696399			NW_023503281.1	370000	7	-0.943049
NW_023503281.1	390000	3	-1.43248			NW_023503281.1	375000	9	-0.869179			NW_023503281.1	375000	10	-1.42475
NW_023503281.1	395000	3	-1.71231			NW_023503281.1	380000	2	-0.846929			NW_023503281.1	380000	2	-1.0085
NW_023503281.1	400000	1	-0.845192			NW_023503281.1	385000	1	-0.18789			NW_023503281.1	385000	1	-0.478312
NW_023503281.1	405000	2	-1.30048			NW_023503281.1	390000	9	-0.718515			NW_023503281.1	390000	9	-1.08767
NW_023503281.1	410000	6	-1.84198			NW_023503281.1	395000	5	-1.12819			NW_023503281.1	395000	7	-1.63627
NW_023503281.1	415000	0	nan			NW_023503281.1	400000	3	0.23925			NW_023503281.1	400000	3	0.170009
NW_023503281.1	420000	1	-1.11966			NW_023503281.1	405000	8	-2.03033			NW_023503281.1	405000	9	-2.06909
NW_023503281.1	425000	1	-1.11966			NW_023503281.1	410000	9	-1.64153			NW_023503281.1	410000	10	-1.72354
NW_023503281.1	430000	1	-1.11966			NW_023503281.1	415000	5	-1.69423			NW_023503281.1	415000	5	-1.73727
NW_023503281.1	435000	2	-1.11882			NW_023503281.1	420000	11	-1.73174			NW_023503281.1	420000	12	-1.97671
NW_023503281.1	440000	2	-0.108029			NW_023503281.1	425000	14	-1.98492			NW_023503281.1	425000	15	-2.16253
NW_023503281.1	445000	3	-0.65756			NW_023503281.1	430000	5	-1.03713			NW_023503281.1	430000	6	-1.50386
NW_023503281.1	450000	0	nan			NW_023503281.1	435000	9	-1.59636			NW_023503281.1	435000	9	-1.69286
NW_023503281.1	455000	1	-0.845192			NW_023503281.1	440000	3	0.0911325			NW_023503281.1	440000	3	0.0689825
NW_023503281.1	460000	1	-1.11966			NW_023503281.1	445000	7	-1.37262			NW_023503281.1	445000	8	-1.46351
NW_023503281.1	465000	2	-1.11882			NW_023503281.1	450000	9	-0.873937			NW_023503281.1	450000	9	-1.32731
NW_023503281.1	470000	1	-0.845192			NW_023503281.1	455000	3	-1.28898			NW_023503281.1	455000	3	-0.0723343
NW_023503281.1	475000	1	-0.845192			NW_023503281.1	460000	2	-0.475405			NW_023503281.1	460000	2	-0.711792
NW_023503281.1	480000	1	-0.845192			NW_023503281.1	465000	7	0.1068			NW_023503281.1	465000	7	-0.261953
NW_023503281.1	485000	1	-1.11966			NW_023503281.1	470000	2	-0.718584			NW_023503281.1	470000	2	-0.796015
NW_023503281.1	490000	2	-1.11882			NW_023503281.1	475000	5	-0.805792			NW_023503281.1	475000	5	-0.759957
NW_023503281.1	495000	1	-0.845192			NW_023503281.1	480000	8	-0.933716			NW_023503281.1	480000	8	-1.06238
NW_023503281.1	500000	0	nan			NW_023503281.1	485000	5	-1.36322			NW_023503281.1	485000	5	-1.49316
NW_023503281.1	505000	1	-1.11966			NW_023503281.1	490000	6	-1.0651			NW_023503281.1	490000	6	0.0118371
NW_023503281.1	510000	1	-0.845192			NW_023503281.1	495000	6	-1.60444			NW_023503281.1	495000	7	-1.80537
NW_023503281.1	515000	2	-1.11882			NW_023503281.1	500000	5	-1.26232			NW_023503281.1	500000	5	-1.46104
NW_023503281.1	520000	1	-1.11966			NW_023503281.1	505000	6	-2.01326			NW_023503281.1	505000	7	-2.06541
NW_023503281.1	525000	1	-0.845192			NW_023503281.1	510000	9	-1.39413			NW_023503281.1	510000	10	-1.74695
NW_023503281.1	530000	0	nan			NW_023503281.1	515000	7	-0.628103			NW_023503281.1	515000	7	-0.722754
NW_023503281.1	535000	2	-0.783441			NW_023503281.1	520000	4	-0.31527			NW_023503281.1	520000	5	-1.07302
NW_023503281.1	540000	5	-1.80482			NW_023503281.1	525000	4	-1.67976			NW_023503281.1	525000	5	-1.77881
NW_023503281.1	545000	0	nan			NW_023503281.1	530000	2	-1.31528			NW_023503281.1	530000	2	-1.29903
NW_023503281.1	550000	0	nan			NW_023503281.1	535000	10	-1.05112			NW_023503281.1	535000	10	-1.13617
NW_023503281.1	555000	8	-2.24522			NW_023503281.1	540000	6	0.151658			NW_023503281.1	540000	9	-0.834365
NW_023503281.1	560000	2	-0.946471			NW_023503281.1	545000	5	-0.70735			NW_023503281.1	545000	5	-1.106
NW_023503281.1	565000	3	-1.29256			NW_023503281.1	550000	7	-1.2216			NW_023503281.1	550000	7	-1.51602
NW_023503281.1	570000	4	-1.41651			NW_023503281.1	555000	20	-1.66535			NW_023503281.1	555000	22	-1.97336
NW_023503281.1	575000	4	-1.53151			NW_023503281.1	560000	10	-1.37944			NW_023503281.1	560000	10	-1.56333
NW_023503281.1	580000	0	nan			NW_023503281.1	565000	9	-0.353749			NW_023503281.1	565000	9	0.185834
NW_023503281.1	585000	2	-0.629727			NW_023503281.1	570000	15	-1.90018			NW_023503281.1	570000	17	-1.59477
NW_023503281.1	590000	1	-0.845192			NW_023503281.1	575000	10	-0.627948			NW_023503281.1	575000	11	-1.17364
NW_023503281.1	595000	2	-1.48214			NW_023503281.1	580000	7	-2.04885			NW_023503281.1	580000	7	-2.03206
NW_023503281.1	600000	2	-1.11882			NW_023503281.1	585000	10	-1.16858			NW_023503281.1	585000	11	-1.52324
NW_023503281.1	605000	1	-0.845192			NW_023503281.1	590000	5	-1.18972			NW_023503281.1	590000	5	-0.629762
NW_023503281.1	610000	2	-1.11882			NW_023503281.1	595000	9	-1.12055			NW_023503281.1	595000	11	-1.70461
NW_023503281.1	615000	2	-0.485328			NW_023503281.1	600000	7	-0.697361			NW_023503281.1	600000	7	-1.04343
NW_023503281.1	620000	3	-1.29256			NW_023503281.1	605000	8	-1.17441			NW_023503281.1	605000	8	-1.21093
NW_023503281.1	625000	2	0.00376311			NW_023503281.1	610000	5	-1.42967			NW_023503281.1	610000	7	-1.75619
NW_023503281.1	630000	0	nan			NW_023503281.1	615000	9	-1.72559			NW_023503281.1	615000	10	-1.79581
NW_023503281.1	635000	1	-0.845192			NW_023503281.1	620000	4	-1.01118			NW_023503281.1	620000	6	-0.851852
NW_023503281.1	640000	0	nan			NW_023503281.1	625000	4	-0.765308			NW_023503281.1	625000	6	-1.10723
NW_023503281.1	645000	5	-1.60861			NW_023503281.1	630000	3	-1.5765			NW_023503281.1	630000	3	-1.54624
NW_023503281.1	650000	0	nan			NW_023503281.1	635000	4	-0.562575			NW_023503281.1	635000	4	-0.490199
NW_023503281.1	655000	0	nan			NW_023503281.1	640000	3	-0.461261			NW_023503281.1	640000	3	-0.807783
NW_023503281.1	660000	3	-1.29256			NW_023503281.1	645000	6	0.982245			NW_023503281.1	645000	7	0.413418
NW_023503281.1	665000	1	-0.845192			NW_023503281.1	650000	12	-1.51239			NW_023503281.1	650000	12	-1.78543
NW_023503281.1	670000	2	0.558067			NW_023503281.1	655000	7	-1.44381			NW_023503281.1	655000	7	-1.63627
NW_023503281.1	675000	0	nan			NW_023503281.1	660000	3	-0.194648			NW_023503281.1	660000	5	-1.05803
NW_023503281.1	680000	5	-0.159685			NW_023503281.1	665000	10	-0.949702			NW_023503281.1	665000	10	-1.15824
NW_023503281.1	685000	106	2.07814			NW_023503281.1	670000	11	-0.607094			NW_023503281.1	670000	11	-0.744326
NW_023503281.1	690000	2	-1.11882			NW_023503281.1	675000	4	-0.884647			NW_023503281.1	675000	4	-1.17013
NW_023503281.1	695000	5	-1.90293			NW_023503281.1	680000	9	-0.51948			NW_023503281.1	680000	11	-0.895862
NW_023503281.1	700000	1	-0.845192			NW_023503281.1	685000	112	2.1678			NW_023503281.1	685000	113	2.57284
NW_023503281.1	705000	2	-1.11882			NW_023503281.1	690000	5	-1.20448			NW_023503281.1	690000	7	-1.6521
NW_023503281.1	710000	2	-1.11882			NW_023503281.1	695000	6	-0.768459			NW_023503281.1	695000	10	-1.47923
NW_023503281.1	715000	13	-1.85585			NW_023503281.1	700000	5	-0.160998			NW_023503281.1	700000	5	-0.355669
NW_023503281.1	720000	5	-1.80482			NW_023503281.1	705000	5	-0.699967			NW_023503281.1	705000	5	-0.937261
NW_023503281.1	725000	4	-1.76151			NW_023503281.1	710000	9	-1.48056			NW_023503281.1	710000	10	-1.74669
NW_023503281.1	730000	1	-0.845192			NW_023503281.1	715000	15	0.724754			NW_023503281.1	715000	17	-0.262225
NW_023503281.1	735000	1	-0.845192			NW_023503281.1	720000	5	-0.120276			NW_023503281.1	720000	9	-1.38636
NW_023503281.1	740000	0	nan			NW_023503281.1	725000	10	-1.08468			NW_023503281.1	725000	12	-1.23654
NW_023503281.1	745000	3	-1.08448			NW_023503281.1	730000	9	-0.382296			NW_023503281.1	730000	9	-0.742584
NW_023503281.1	750000	4	-1.41651			NW_023503281.1	735000	6	-1.02734			NW_023503281.1	735000	6	-1.27899
NW_023503281.1	755000	10	-1.77309			NW_023503281.1	740000	1	0.407219			NW_023503281.1	740000	1	-0.081923
NW_023503281.1	760000	2	-1.11882			NW_023503281.1	745000	6	-2.01326			NW_023503281.1	745000	7	-1.84208
NW_023503281.1	765000	1	-0.845192			NW_023503281.1	750000	10	-0.276281			NW_023503281.1	750000	10	-0.579136
NW_023503281.1	770000	11	-1.80435			NW_023503281.1	755000	14	0.532715			NW_023503281.1	755000	14	-0.13017
NW_023503281.1	775000	5	-1.51051			NW_023503281.1	760000	4	-0.735114			NW_023503281.1	760000	4	0.758001
NW_023503281.1	780000	7	-1.95012			NW_023503281.1	765000	7	-0.81279			NW_023503281.1	765000	7	-0.625743
NW_023503281.1	785000	5	-1.50097			NW_023503281.1	770000	16	0.316941			NW_023503281.1	770000	17	-0.445224
NW_023503281.1	790000	1	-0.845192			NW_023503281.1	775000	10	-0.182892			NW_023503281.1	775000	10	-0.168693
NW_023503281.1	795000	1	-0.5848			NW_023503281.1	780000	7	-1.44765			NW_023503281.1	780000	9	-1.64478
NW_023503281.1	800000	0	nan			NW_023503281.1	785000	9	-0.581331			NW_023503281.1	785000	10	-1.07138
NW_023503281.1	805000	20	-1.99767			NW_023503281.1	790000	7	-1.07058			NW_023503281.1	790000	7	-1.35737
NW_023503281.1	810000	26	-2.02397			NW_023503281.1	795000	8	-0.657391			NW_023503281.1	795000	8	-1.04499
NW_023503281.1	815000	12	-1.98041			NW_023503281.1	800000	3	-1.67583			NW_023503281.1	800000	3	-1.60577
NW_023503281.1	820000	9	-1.62129			NW_023503281.1	805000	30	-0.0256819			NW_023503281.1	805000	33	-0.808072
NW_023503281.1	825000	1	-0.845192			NW_023503281.1	810000	32	0.980756			NW_023503281.1	810000	32	0.36213
NW_023503281.1	830000	11	-1.80435			NW_023503281.1	815000	14	0.276704			NW_023503281.1	815000	15	-0.442652
NW_023503281.1	835000	7	-1.62828			NW_023503281.1	820000	15	-0.0599008			NW_023503281.1	820000	16	-0.678707
NW_023503281.1	840000	52	0.387289			NW_023503281.1	825000	4	-0.356967			NW_023503281.1	825000	4	-0.72299
NW_023503281.1	845000	19	-1.90711			NW_023503281.1	830000	14	0.700668			NW_023503281.1	830000	15	-0.0223624
NW_023503281.1	850000	3	-1.29256			NW_023503281.1	835000	5	0.0321944			NW_023503281.1	835000	8	-0.721747
NW_023503281.1	855000	0	nan			NW_023503281.1	840000	52	0.236642			NW_023503281.1	840000	59	0.42347
NW_023503281.1	860000	7	-1.87381			NW_023503281.1	845000	28	0.126065			NW_023503281.1	845000	30	-0.462485
NW_023503281.1	865000	7	-1.64489			NW_023503281.1	850000	36	-0.672589			NW_023503281.1	850000	43	-1.02742
NW_023503281.1	870000	29	-2.06698			NW_023503281.1	855000	5	-1.49612			NW_023503281.1	855000	5	-1.61436
NW_023503281.1	875000	17	-1.92955			NW_023503281.1	860000	8	0.478321			NW_023503281.1	860000	11	-0.796588
NW_023503281.1	880000	16	-1.91387			NW_023503281.1	865000	10	0.0841421			NW_023503281.1	865000	10	0.0241853
NW_023503281.1	885000	20	-2.03275			NW_023503281.1	870000	36	1.18054			NW_023503281.1	870000	36	0.310058
NW_023503281.1	890000	7	-1.95012			NW_023503281.1	875000	20	0.935674			NW_023503281.1	875000	21	0.0366036
NW_023503281.1	895000	2	-1.11882			NW_023503281.1	880000	28	0.482111			NW_023503281.1	880000	28	-0.27454
NW_023503281.1	900000	2	-1.11882			NW_023503281.1	885000	31	-1.27208			NW_023503281.1	885000	31	-1.26042
NW_023503281.1	905000	4	-1.41651			NW_023503281.1	890000	9	-0.586089			NW_023503281.1	890000	12	-1.31203
NW_023503281.1	910000	2	-1.11882			NW_023503281.1	895000	7	-1.42168			NW_023503281.1	895000	8	-1.0212
NW_023503281.1	915000	2	-1.11882			NW_023503281.1	900000	8	-0.488816			NW_023503281.1	900000	8	-0.119199
NW_023503281.1	920000	0	nan			NW_023503281.1	905000	14	-0.621895			NW_023503281.1	905000	14	-0.77499
NW_023503281.1	925000	13	-2.27308			NW_023503281.1	910000	5	-0.669204			NW_023503281.1	910000	5	-0.192498
NW_023503281.1	930000	0	nan			NW_023503281.1	915000	5	-0.160998			NW_023503281.1	915000	5	-0.280294
NW_023503281.1	935000	2	-1.30048			NW_023503281.1	920000	5	-1.90219			NW_023503281.1	920000	5	-1.86361
NW_023503281.1	940000	2	-1.30048			NW_023503281.1	925000	7	-0.646379			NW_023503281.1	925000	16	-1.74397
NW_023503281.1	945000	2	-1.48214			NW_023503281.1	930000	9	-1.20778			NW_023503281.1	930000	9	-1.55021
NW_023503281.1	950000	0	nan			NW_023503281.1	935000	6	-1.22582			NW_023503281.1	935000	7	-1.00166
NW_023503281.1	955000	9	-2.2323			NW_023503281.1	940000	10	-1.67711			NW_023503281.1	940000	11	-1.88764
NW_023503281.1	960000	0	nan			NW_023503281.1	945000	2	-0.846929			NW_023503281.1	945000	4	-1.53801
NW_023503281.1	965000	5	-0.723157			NW_023503281.1	950000	4	-0.939284			NW_023503281.1	950000	4	-1.18907
NW_023503281.1	970000	1	-0.845192			NW_023503281.1	955000	22	-1.25262			NW_023503281.1	955000	31	-2.06314
NW_023503281.1	975000	2	-1.11882			NW_023503281.1	960000	5	0.18724			NW_023503281.1	960000	5	-0.524836
NW_023503281.1	980000	2	-1.48214			NW_023503281.1	965000	15	-0.839324			NW_023503281.1	965000	16	-0.84748
NW_023503281.1	985000	1	-1.11966			NW_023503281.1	970000	10	-1.18244			NW_023503281.1	970000	11	-1.64399
NW_023503281.1	990000	2	-1.11882			NW_023503281.1	975000	15	-1.26304			NW_023503281.1	975000	15	-0.919018
NW_023503281.1	995000	0	nan			NW_023503281.1	980000	8	-1.15356			NW_023503281.1	980000	10	-1.70091
NW_023503281.1	1000000	2	-1.11882			NW_023503281.1	985000	2	-1.0721			NW_023503281.1	985000	3	-1.43078
NW_023503281.1	1005000	0	nan			NW_023503281.1	990000	12	-1.51176			NW_023503281.1	990000	12	-1.33585
NW_023503281.1	1010000	1	-0.845192			NW_023503281.1	995000	3	0.267132			NW_023503281.1	995000	3	-0.354367
NW_023503281.1	1015000	6	-1.35376			NW_023503281.1	1000000	25	-1.27194			NW_023503281.1	1000000	26	-1.68946
NW_023503281.1	1020000	0	nan			NW_023503281.1	1005000	4	-0.384285			NW_023503281.1	1005000	4	-0.829166
NW_023503281.1	1025000	2	-1.11882			NW_023503281.1	1010000	9	-1.11024			NW_023503281.1	1010000	9	-1.31782
NW_023503281.1	1030000	5	-1.1684			NW_023503281.1	1015000	13	-1.54954			NW_023503281.1	1015000	16	-1.52451
NW_023503281.1	1035000	1	-0.845192			NW_023503281.1	1020000	7	-1.43323			NW_023503281.1	1020000	7	-1.61775
NW_023503281.1	1040000	1	-0.845192			NW_023503281.1	1025000	7	-0.588664			NW_023503281.1	1025000	8	-1.15481
NW_023503281.1	1045000	4	-1.50916			NW_023503281.1	1030000	14	-1.72883			NW_023503281.1	1030000	14	-1.33373
NW_023503281.1	1050000	3	-1.43248			NW_023503281.1	1035000	12	-1.24037			NW_023503281.1	1035000	12	-1.57523
NW_023503281.1	1055000	0	nan			NW_023503281.1	1040000	11	-1.4403			NW_023503281.1	1040000	11	-1.29083
NW_023503281.1	1060000	4	-0.584975			NW_023503281.1	1045000	10	-1.58664			NW_023503281.1	1045000	13	-1.53462
NW_023503281.1	1065000	11	-2.23049			NW_023503281.1	1050000	11	-1.36812			NW_023503281.1	1050000	12	-1.23832
NW_023503281.1	1070000	0	nan			NW_023503281.1	1055000	11	-1.57224			NW_023503281.1	1055000	11	-1.80961
NW_023503281.1	1075000	6	-1.54289			NW_023503281.1	1060000	12	-1.39401			NW_023503281.1	1060000	14	-1.11676
NW_023503281.1	1080000	1	-0.845192			NW_023503281.1	1065000	14	-1.57418			NW_023503281.1	1065000	14	-1.43337
NW_023503281.1	1085000	0	nan			NW_023503281.1	1070000	3	-1.48066			NW_023503281.1	1070000	3	-1.48791
NW_023503281.1	1090000	0	nan			NW_023503281.1	1075000	7	-1.12349			NW_023503281.1	1075000	12	-1.79278
NW_023503281.1	1095000	0	nan			NW_023503281.1	1080000	7	-1.67659			NW_023503281.1	1080000	8	-1.87378
NW_023503281.1	1100000	1	-1.11966			NW_023503281.1	1085000	5	-0.767646			NW_023503281.1	1085000	5	-1.14497
NW_023503281.1	1105000	5	-0.941443			NW_023503281.1	1090000	6	-1.54943			NW_023503281.1	1090000	6	-1.68579
NW_023503281.1	1110000	0	nan			NW_023503281.1	1095000	7	-1.47651			NW_023503281.1	1095000	7	-1.67602
NW_023503281.1	1115000	0	nan			NW_023503281.1	1100000	3	-1.38831			NW_023503281.1	1100000	4	-1.62973
NW_023503281.1	1120000	0	nan			NW_023503281.1	1105000	10	-0.491016			NW_023503281.1	1105000	12	-0.709382
NW_023503281.1	1125000	5	-0.861509			NW_023503281.1	1110000	10	-1.5436			NW_023503281.1	1110000	10	-1.79272
NW_023503281.1	1130000	1	1.12535			NW_023503281.1	1115000	7	-1.36108			NW_023503281.1	1115000	7	-1.6073
NW_023503281.1	1135000	2	-1.30048			NW_023503281.1	1120000	12	-1.97962			NW_023503281.1	1120000	12	-2.10029
NW_023503281.1	1140000	0	nan			NW_023503281.1	1125000	9	-1.03491			NW_023503281.1	1125000	12	-0.800322
NW_023503281.1	1145000	2	-1.30048			NW_023503281.1	1130000	10	-1.77707			NW_023503281.1	1130000	10	-1.66825
NW_023503281.1	1150000	1	-1.11966			NW_023503281.1	1135000	5	0.435806			NW_023503281.1	1135000	6	-0.574628
NW_023503281.1	1155000	12	-2.42653			NW_023503281.1	1140000	7	-1.262			NW_023503281.1	1140000	7	-1.53017
NW_023503281.1	1160000	0	nan			NW_023503281.1	1145000	6	-0.880664			NW_023503281.1	1145000	6	-0.8576
NW_023503281.1	1165000	1	-0.845192			NW_023503281.1	1150000	6	-1.04676			NW_023503281.1	1150000	6	-1.31552
NW_023503281.1	1170000	1	-0.845192			NW_023503281.1	1155000	45	-1.97157			NW_023503281.1	1155000	56	-2.42444
NW_023503281.1	1175000	61	-2.64595			NW_023503281.1	1160000	3	-1.47718			NW_023503281.1	1160000	3	-1.48671
NW_023503281.1	1180000	1	-0.845192			NW_023503281.1	1165000	7	-1.46593			NW_023503281.1	1165000	7	-0.876691
NW_023503281.1	1185000	9	-2.30107			NW_023503281.1	1170000	3	-1.28898			NW_023503281.1	1170000	3	0.0238814
NW_023503281.1	1190000	0	nan			NW_023503281.1	1175000	7	-0.421291			NW_023503281.1	1175000	68	-2.64901
NW_023503281.1	1195000	0	nan			NW_023503281.1	1180000	8	-1.39165			NW_023503281.1	1180000	8	-1.07367
NW_023503281.1	1200000	3	-1.27896			NW_023503281.1	1185000	5	-1.31769			NW_023503281.1	1185000	14	-2.26195
NW_023503281.1	1205000	2	-1.11882			NW_023503281.1	1190000	1	-1.08393			NW_023503281.1	1190000	1	-1.02565
NW_023503281.1	1210000	1	-1.11966			NW_023503281.1	1195000	9	-1.4084			NW_023503281.1	1195000	9	-1.67937
NW_023503281.1	1215000	2	-1.11882			NW_023503281.1	1200000	7	-0.707942			NW_023503281.1	1200000	8	-0.686195
NW_023503281.1	1220000	0	nan			NW_023503281.1	1205000	8	-0.805981			NW_023503281.1	1205000	8	-0.642341
NW_023503281.1	1225000	1	-0.845192			NW_023503281.1	1210000	6	-1.95177			NW_023503281.1	1210000	6	-1.89973
NW_023503281.1	1230000	25	-2.51902			NW_023503281.1	1215000	4	-0.41448			NW_023503281.1	1215000	5	-0.985655
NW_023503281.1	1235000	0	nan			NW_023503281.1	1220000	5	-1.32015			NW_023503281.1	1220000	5	-1.49915
NW_023503281.1	1240000	3	-1.71231			NW_023503281.1	1225000	5	-0.872241			NW_023503281.1	1225000	5	-0.981801
NW_023503281.1	1245000	3	-1.57239			NW_023503281.1	1230000	2	-1.44362			NW_023503281.1	1230000	27	-2.63243
NW_023503281.1	1250000	3	-1.71231			NW_023503281.1	1235000	1	-0.52602			NW_023503281.1	1235000	1	-0.690333
NW_023503281.1	1255000	0	nan			NW_023503281.1	1240000	5	-1.48627			NW_023503281.1	1240000	8	-1.96194
NW_023503281.1	1260000	1	-0.845192			NW_023503281.1	1245000	10	-1.37214			NW_023503281.1	1245000	11	-1.32613
NW_023503281.1	1265000	2	-1.11882			NW_023503281.1	1250000	13	-1.73576			NW_023503281.1	1250000	16	-2.10526
NW_023503281.1	1270000	17	-1.96641			NW_023503281.1	1255000	9	-1.29025			NW_023503281.1	1255000	9	-1.55579
NW_023503281.1	1275000	0	nan			NW_023503281.1	1260000	10	-1.16931			NW_023503281.1	1260000	11	-1.59961
NW_023503281.1	1280000	19	-1.92512			NW_023503281.1	1265000	8	-1.34386			NW_023503281.1	1265000	9	-1.13091
NW_023503281.1	1285000	3	-1.43248			NW_023503281.1	1270000	22	1.10379			NW_023503281.1	1270000	24	0.0372829
NW_023503281.1	1290000	0	nan			NW_023503281.1	1275000	13	0.740834			NW_023503281.1	1275000	13	-0.196081
NW_023503281.1	1295000	6	-1.67045			NW_023503281.1	1280000	41	2.73937			NW_023503281.1	1280000	41	2.00084
NW_023503281.1	1300000	11	-2.07069			NW_023503281.1	1285000	6	-0.160081			NW_023503281.1	1285000	7	-0.220184
NW_023503281.1	1305000	16	1.76833			NW_023503281.1	1290000	4	-0.0492734			NW_023503281.1	1290000	4	-0.273359
NW_023503281.1	1310000	78	1.86917			NW_023503281.1	1295000	12	1.07122			NW_023503281.1	1295000	12	0.840338
NW_023503281.1	1315000	23	-0.38162			NW_023503281.1	1300000	13	-0.784904			NW_023503281.1	1300000	14	-0.640169
NW_023503281.1	1320000	3	-0.140949			NW_023503281.1	1305000	23	0.351707			NW_023503281.1	1305000	24	0.656382
NW_023503281.1	1325000	0	nan			NW_023503281.1	1310000	100	0.986383			NW_023503281.1	1310000	101	1.34283
NW_023503281.1	1330000	1	-1.11966			NW_023503281.1	1315000	27	0.568415			NW_023503281.1	1315000	34	0.0195862
NW_023503281.1	1335000	0	nan			NW_023503281.1	1320000	6	-1.07346			NW_023503281.1	1320000	6	-0.581886
NW_023503281.1	1340000	3	-1.29256			NW_023503281.1	1325000	5	-1.83205			NW_023503281.1	1325000	5	-1.82121
NW_023503281.1	1345000	0	nan			NW_023503281.1	1330000	7	-1.48228			NW_023503281.1	1330000	8	-1.79112
NW_023503281.1	1350000	3	-1.29256			NW_023503281.1	1335000	6	-0.895744			NW_023503281.1	1335000	6	-1.26769
NW_023503281.1	1355000	1	-0.290908			NW_023503281.1	1340000	6	-0.99714			NW_023503281.1	1340000	6	-1.13887
NW_023503281.1	1360000	3	-0.0548475			NW_023503281.1	1345000	6	-1.29809			NW_023503281.1	1345000	6	-1.51892
NW_023503281.1	1365000	3	-1.16699			NW_023503281.1	1350000	6	0.456926			NW_023503281.1	1350000	7	-0.166626
NW_023503281.1	1370000	2	-1.30048			NW_023503281.1	1355000	15	0.164261			NW_023503281.1	1355000	15	-0.531297
NW_023503281.1	1375000	1	-1.11966			NW_023503281.1	1360000	7	-0.770466			NW_023503281.1	1360000	8	-1.009
NW_023503281.1	1380000	3	-0.793887			NW_023503281.1	1365000	4	-1.60643			NW_023503281.1	1365000	7	-1.86869
NW_023503281.1	1385000	5	-2.00103			NW_023503281.1	1370000	8	-2.07986			NW_023503281.1	1370000	10	-2.18722
NW_023503281.1	1390000	32	1.92031			NW_023503281.1	1375000	11	-1.29851			NW_023503281.1	1375000	11	-1.62156
NW_023503281.1	1395000	0	nan			NW_023503281.1	1380000	7	-1.13311			NW_023503281.1	1380000	8	-1.35644
NW_023503281.1	1400000	2	-1.11882			NW_023503281.1	1385000	4	-1.46265			NW_023503281.1	1385000	8	-2.00007
NW_023503281.1	1405000	1	-1.11966			NW_023503281.1	1390000	44	0.835988			NW_023503281.1	1390000	44	1.20144
NW_023503281.1	1410000	1	-0.845192			NW_023503281.1	1395000	5	-0.994062			NW_023503281.1	1395000	5	-1.29572
NW_023503281.1	1415000	14	-2.13078			NW_023503281.1	1400000	3	0.139924			NW_023503281.1	1400000	3	1.31317
NW_023503281.1	1420000	2	-1.48214			NW_023503281.1	1405000	6	-0.895744			NW_023503281.1	1405000	7	-1.43349
NW_023503281.1	1425000	2	-1.11882			NW_023503281.1	1410000	9	-1.65263			NW_023503281.1	1410000	9	-1.43276
NW_023503281.1	1430000	5	-1.90293			NW_023503281.1	1415000	13	-1.57135			NW_023503281.1	1415000	24	-2.19592
NW_023503281.1	1435000	1	-0.845192			NW_023503281.1	1420000	6	-1.76948			NW_023503281.1	1420000	8	-2.02173
NW_023503281.1	1440000	1	-0.845192			NW_023503281.1	1425000	8	-1.28477			NW_023503281.1	1425000	9	-1.31057
NW_023503281.1	1445000	1	-1.11966			NW_023503281.1	1430000	8	-1.08057			NW_023503281.1	1430000	10	-1.37842
NW_023503281.1	1450000	1	-0.845192			NW_023503281.1	1435000	4	-0.614337			NW_023503281.1	1435000	4	-0.0754615
NW_023503281.1	1455000	1	-1.11966			NW_023503281.1	1440000	13	-1.46759			NW_023503281.1	1440000	13	-1.28124
NW_023503281.1	1460000	3	-1.71231			NW_023503281.1	1445000	3	-0.926526			NW_023503281.1	1445000	4	-1.39295
NW_023503281.1	1465000	1	0.681974			NW_023503281.1	1450000	13	-1.50768			NW_023503281.1	1450000	13	-1.36558
NW_023503281.1	1470000	1	-1.11966			NW_023503281.1	1455000	8	-1.52199			NW_023503281.1	1455000	8	-1.70116
NW_023503281.1	1475000	1	-0.845192			NW_023503281.1	1460000	8	-2.07974			NW_023503281.1	1460000	11	-2.26246
NW_023503281.1	1480000	0	nan			NW_023503281.1	1465000	5	-1.46289			NW_023503281.1	1465000	5	-1.28801
NW_023503281.1	1485000	1	-1.11966			NW_023503281.1	1470000	5	-1.46289			NW_023503281.1	1470000	6	-1.7291
NW_023503281.1	1490000	3	-1.43248			NW_023503281.1	1475000	8	-1.05711			NW_023503281.1	1475000	9	-1.52649
NW_023503281.1	1495000	4	-1.41651			NW_023503281.1	1480000	7	-2.04885			NW_023503281.1	1480000	7	-2.03206
NW_023503281.1	1500000	11	-1.71814			NW_023503281.1	1485000	8	-1.56805			NW_023503281.1	1485000	9	-1.85875
NW_023503281.1	1505000	2	-1.11882			NW_023503281.1	1490000	8	-0.779044			NW_023503281.1	1490000	9	-0.852219
NW_023503281.1	1510000	10	1.66986			NW_023503281.1	1495000	11	-1.91896			NW_023503281.1	1495000	13	-1.69439
NW_023503281.1	1515000	19	-0.15593			NW_023503281.1	1500000	14	-1.7199			NW_023503281.1	1500000	25	-2.24343
NW_023503281.1	1520000	12	-0.953444			NW_023503281.1	1505000	3	1.13144			NW_023503281.1	1505000	3	1.31498
NW_023503281.1	1525000	1	-1.11966			NW_023503281.1	1510000	18	0.376921			NW_023503281.1	1510000	18	0.490031
NW_023503281.1	1530000	2	-1.11882			NW_023503281.1	1515000	28	-0.451646			NW_023503281.1	1515000	29	-0.450565
NW_023503281.1	1535000	0	nan			NW_023503281.1	1520000	14	-1.33583			NW_023503281.1	1520000	16	-1.20984
NW_023503281.1	1540000	60	-2.76772			NW_023503281.1	1525000	5	-1.15649			NW_023503281.1	1525000	6	-1.55621
NW_023503281.1	1545000	41	-2.66803			NW_023503281.1	1530000	3	-0.557102			NW_023503281.1	1530000	4	-1.04052
NW_023503281.1	1550000	1	-0.845192			NW_023503281.1	1535000	3	-1.67583			NW_023503281.1	1535000	3	-1.60577
NW_023503281.1	1555000	6	-1.75621			NW_023503281.1	1540000	77	-1.04644			NW_023503281.1	1540000	81	-1.47344
NW_023503281.1	1560000	3	-1.41741			NW_023503281.1	1545000	57	-1.70474			NW_023503281.1	1545000	57	-1.8065
NW_023503281.1	1565000	1	-0.845192			NW_023503281.1	1550000	8	-1.84958			NW_023503281.1	1550000	8	-1.22893
NW_023503281.1	1570000	1	-0.845192			NW_023503281.1	1555000	4	-1.14345			NW_023503281.1	1555000	10	-1.96477
NW_023503281.1	1575000	2	-1.11882			NW_023503281.1	1560000	8	-1.55949			NW_023503281.1	1560000	9	-1.73072
NW_023503281.1	1580000	4	-1.64651			NW_023503281.1	1565000	6	-0.634702			NW_023503281.1	1565000	7	-1.23374
NW_023503281.1	1585000	2	-1.11882			NW_023503281.1	1570000	7	-1.28413			NW_023503281.1	1570000	8	-1.64683
NW_023503281.1	1590000	2	-1.11882			NW_023503281.1	1575000	12	-1.88202			NW_023503281.1	1575000	13	-1.62466
NW_023503281.1	1595000	3	-1.29256			NW_023503281.1	1580000	9	-1.10469			NW_023503281.1	1580000	10	-0.86871
NW_023503281.1	1600000	0	nan			NW_023503281.1	1585000	11	-1.73309			NW_023503281.1	1585000	11	-1.44545
NW_023503281.1	1605000	1	-1.11966			NW_023503281.1	1590000	9	-1.97775			NW_023503281.1	1590000	11	-2.1258
NW_023503281.1	1610000	3	-1.43248			NW_023503281.1	1595000	10	-0.58709			NW_023503281.1	1595000	10	0.135283
NW_023503281.1	1615000	2	-1.48214			NW_023503281.1	1600000	2	-0.450636			NW_023503281.1	1600000	2	-0.7427
NW_023503281.1	1620000	0	nan			NW_023503281.1	1605000	9	-1.75968			NW_023503281.1	1605000	10	-1.98817
NW_023503281.1	1625000	3	-1.71231			NW_023503281.1	1610000	12	-1.30649			NW_023503281.1	1610000	14	-1.42256
NW_023503281.1	1630000	2	-1.48214			NW_023503281.1	1615000	9	-1.22919			NW_023503281.1	1615000	11	-1.72728
NW_023503281.1	1635000	1	-1.11966			NW_023503281.1	1620000	0	nan			NW_023503281.1	1620000	0	nan
NW_023503281.1	1640000	2	-1.11882			NW_023503281.1	1625000	6	-1.19022			NW_023503281.1	1625000	9	-1.81858
NW_023503281.1	1645000	1	-0.845192			NW_023503281.1	1630000	7	-1.68621			NW_023503281.1	1630000	9	-1.99238
NW_023503281.1	1650000	2	-1.11882			NW_023503281.1	1635000	6	-1.37792			NW_023503281.1	1635000	7	-1.71139
NW_023503281.1	1655000	3	-1.71231			NW_023503281.1	1640000	13	-0.735382			NW_023503281.1	1640000	13	-0.909223
NW_023503281.1	1660000	1	-0.845192			NW_023503281.1	1645000	6	-1.60444			NW_023503281.1	1645000	6	-1.65452
NW_023503281.1	1665000	0	nan			NW_023503281.1	1650000	8	-1.6645			NW_023503281.1	1650000	9	-1.81914
NW_023503281.1	1670000	0	nan			NW_023503281.1	1655000	6	-1.61091			NW_023503281.1	1655000	9	-2.02111
NW_023503281.1	1675000	4	-0.502412			NW_023503281.1	1660000	8	-0.609599			NW_023503281.1	1660000	8	-0.544118
NW_023503281.1	1680000	1	-0.845192			NW_023503281.1	1665000	6	-1.95177			NW_023503281.1	1665000	6	-1.93702
NW_023503281.1	1685000	2	-1.30048			NW_023503281.1	1670000	6	-2.01326			NW_023503281.1	1670000	6	-1.97431
NW_023503281.1	1690000	4	-1.5374			NW_023503281.1	1675000	13	-0.815707			NW_023503281.1	1675000	13	-0.58461
NW_023503281.1	1695000	2	-1.11882			NW_023503281.1	1680000	9	-0.930238			NW_023503281.1	1680000	9	-1.11111
NW_023503281.1	1700000	4	-0.275362			NW_023503281.1	1685000	6	-0.385818			NW_023503281.1	1685000	6	-0.852613
NW_023503281.1	1705000	5	-1.16085			NW_023503281.1	1690000	8	-1.5498			NW_023503281.1	1690000	9	-1.68886
NW_023503281.1	1710000	2	-1.30048			NW_023503281.1	1695000	4	-1.29874			NW_023503281.1	1695000	6	-1.68353
NW_023503281.1	1715000	2	-1.11882			NW_023503281.1	1700000	15	-1.19974			NW_023503281.1	1700000	15	-1.34089
NW_023503281.1	1720000	0	nan			NW_023503281.1	1705000	11	-1.41814			NW_023503281.1	1705000	15	-1.83951
NW_023503281.1	1725000	0	nan			NW_023503281.1	1710000	13	-1.58609			NW_023503281.1	1710000	14	-1.42351
NW_023503281.1	1730000	2	-1.11882			NW_023503281.1	1715000	6	-0.91516			NW_023503281.1	1715000	8	-1.51475
NW_023503281.1	1735000	2	-1.11882			NW_023503281.1	1720000	16	-2.03119			NW_023503281.1	1720000	16	-2.1776
NW_023503281.1	1740000	2	-1.30048			NW_023503281.1	1725000	8	-0.736465			NW_023503281.1	1725000	8	-1.19995
NW_023503281.1	1745000	2	-1.11882			NW_023503281.1	1730000	5	-1.2414			NW_023503281.1	1730000	6	-0.686874
NW_023503281.1	1750000	22	0.710167			NW_023503281.1	1735000	11	-0.892987			NW_023503281.1	1735000	11	-0.501153
NW_023503281.1	1755000	20	0.377118			NW_023503281.1	1740000	7	-1.25239			NW_023503281.1	1740000	8	-1.09288
NW_023503281.1	1760000	1	-0.845192			NW_023503281.1	1745000	9	-0.302999			NW_023503281.1	1745000	9	-0.177945
NW_023503281.1	1765000	3	-1.57239			NW_023503281.1	1750000	26	1.33602			NW_023503281.1	1750000	26	1.49155
NW_023503281.1	1770000	1	0.111926			NW_023503281.1	1755000	22	0.800449			NW_023503281.1	1755000	22	0.966501
NW_023503281.1	1775000	0	nan			NW_023503281.1	1760000	11	-1.6405			NW_023503281.1	1760000	11	-1.63182
NW_023503281.1	1780000	0	nan			NW_023503281.1	1765000	3	-1.11472			NW_023503281.1	1765000	5	-0.666594
NW_023503281.1	1785000	2	-1.30048			NW_023503281.1	1770000	4	-0.841512			NW_023503281.1	1770000	4	-0.832157
NW_023503281.1	1790000	2	-1.11882			NW_023503281.1	1775000	4	-1.20528			NW_023503281.1	1775000	4	-1.38597
NW_023503281.1	1795000	3	-1.57239			NW_023503281.1	1780000	7	-1.02634			NW_023503281.1	1780000	7	-1.3769
NW_023503281.1	1800000	2	-1.11882			NW_023503281.1	1785000	6	-0.765223			NW_023503281.1	1785000	7	-0.649659
NW_023503281.1	1805000	8	-2.24522			NW_023503281.1	1790000	8	-0.523574			NW_023503281.1	1790000	8	-0.229013
NW_023503281.1	1810000	1	-0.845192			NW_023503281.1	1795000	5	-1.00391			NW_023503281.1	1795000	8	-1.70906
NW_023503281.1	1815000	0	nan			NW_023503281.1	1800000	10	-0.773139			NW_023503281.1	1800000	10	-0.753755
NW_023503281.1	1820000	1	-0.845192			NW_023503281.1	1805000	21	-1.24675			NW_023503281.1	1805000	21	-1.61648
NW_023503281.1	1825000	10	-1.45714			NW_023503281.1	1810000	5	-1.5761			NW_023503281.1	1810000	5	-1.58481
NW_023503281.1	1830000	0	nan			NW_023503281.1	1815000	10	-1.55235			NW_023503281.1	1815000	10	-1.79581
NW_023503281.1	1835000	2	-1.30048			NW_023503281.1	1820000	12	-1.72649			NW_023503281.1	1820000	12	-1.43717
NW_023503281.1	1840000	1	-1.11966			NW_023503281.1	1825000	18	-1.19249			NW_023503281.1	1825000	20	-1.48281
NW_023503281.1	1845000	3	-1.43248			NW_023503281.1	1830000	7	-1.34665			NW_023503281.1	1830000	7	-1.5881
NW_023503281.1	1850000	0	nan			NW_023503281.1	1835000	8	-1.38035			NW_023503281.1	1835000	9	-1.08098
NW_023503281.1	1855000	2	-1.30048			NW_023503281.1	1840000	9	-1.2276			NW_023503281.1	1840000	10	-1.65359
NW_023503281.1	1860000	4	-1.75562			NW_023503281.1	1845000	6	-1.60444			NW_023503281.1	1845000	7	-0.275763
NW_023503281.1	1865000	3	-1.57239			NW_023503281.1	1850000	9	-1.33545			NW_023503281.1	1850000	9	-1.63027
NW_023503281.1	1870000	1	-0.338482			NW_023503281.1	1855000	6	-0.591555			NW_023503281.1	1855000	8	-1.35095
NW_023503281.1	1875000	0	nan			NW_023503281.1	1860000	6	-0.777088			NW_023503281.1	1860000	9	-1.358
NW_023503281.1	1880000	2	-1.30048			NW_023503281.1	1865000	6	-0.900058			NW_023503281.1	1865000	6	-0.828499
NW_023503281.1	1885000	0	nan			NW_023503281.1	1870000	7	-0.776238			NW_023503281.1	1870000	7	-1.10743
NW_023503281.1	1890000	2	-0.783441			NW_023503281.1	1875000	7	-1.19948			NW_023503281.1	1875000	7	-1.49412
NW_023503281.1	1895000	2	-1.30048			NW_023503281.1	1880000	3	-0.238212			NW_023503281.1	1880000	4	-0.792279
NW_023503281.1	1900000	7	-1.94271			NW_023503281.1	1885000	5	-1.56626			NW_023503281.1	1885000	5	-1.65676
NW_023503281.1	1905000	3	-1.43965			NW_023503281.1	1890000	7	-0.858			NW_023503281.1	1890000	7	-1.07476
NW_023503281.1	1910000	0	nan			NW_023503281.1	1895000	10	-1.62385			NW_023503281.1	1895000	11	-1.88025
NW_023503281.1	1915000	0	nan			NW_023503281.1	1900000	11	-1.30662			NW_023503281.1	1900000	15	-1.51891
NW_023503281.1	1920000	1	-0.845192			NW_023503281.1	1905000	4	-1.31312			NW_023503281.1	1905000	6	-1.66582
NW_023503281.1	1925000	3	-1.71231			NW_023503281.1	1910000	10	-1.45021			NW_023503281.1	1910000	10	-1.7166
NW_023503281.1	1930000	0	nan			NW_023503281.1	1915000	5	-1.62901			NW_023503281.1	1915000	5	-1.69658
NW_023503281.1	1935000	0	nan			NW_023503281.1	1920000	13	-2.08308			NW_023503281.1	1920000	14	-2.20593
NW_023503281.1	1940000	3	-1.57239			NW_023503281.1	1925000	9	-2.1974			NW_023503281.1	1925000	9	-2.09671
NW_023503281.1	1945000	13	-0.296281			NW_023503281.1	1930000	8	-1.60802			NW_023503281.1	1930000	8	-1.77495
NW_023503281.1	1950000	9	0.160922			NW_023503281.1	1935000	5	-1.49858			NW_023503281.1	1935000	5	-1.61521
NW_023503281.1	1955000	4	-1.8765			NW_023503281.1	1940000	8	-1.39773			NW_023503281.1	1940000	10	-1.37559
NW_023503281.1	1960000	6	0.739856			NW_023503281.1	1945000	20	-0.0957668			NW_023503281.1	1945000	20	-0.0680306
NW_023503281.1	1965000	2	-0.666991			NW_023503281.1	1950000	12	-0.379582			NW_023503281.1	1950000	12	-0.106471
NW_023503281.1	1970000	0	nan			NW_023503281.1	1955000	5	-1.76929			NW_023503281.1	1955000	9	-2.15362
NW_023503281.1	1975000	1	-0.845192			NW_023503281.1	1960000	12	-0.156042			NW_023503281.1	1960000	13	-0.144516
NW_023503281.1	1980000	6	-2.09929			NW_023503281.1	1965000	5	-1.5761			NW_023503281.1	1965000	6	-1.58296
NW_023503281.1	1985000	1	-0.845192			NW_023503281.1	1970000	5	-1.97233			NW_023503281.1	1970000	5	-1.90601
NW_023503281.1	1990000	0	nan			NW_023503281.1	1975000	3	-0.321855			NW_023503281.1	1975000	3	-0.175165
NW_023503281.1	1995000	0	nan			NW_023503281.1	1980000	1	-1.08393			NW_023503281.1	1980000	7	-2.09876
NW_023503281.1	2000000	4	-0.89164			NW_023503281.1	1985000	6	-0.279815			NW_023503281.1	1985000	6	-0.684237
NW_023503281.1	2005000	2	-1.11882			NW_023503281.1	1990000	7	-1.13022			NW_023503281.1	1990000	7	-1.44158
NW_023503281.1	2010000	1	-0.845192			NW_023503281.1	1995000	0	nan			NW_023503281.1	1995000	0	nan
NW_023503281.1	2015000	0	nan			NW_023503281.1	2000000	7	-1.04654			NW_023503281.1	2000000	9	-1.12729
NW_023503281.1	2020000	8	-2.10762			NW_023503281.1	2005000	6	-0.711289			NW_023503281.1	2005000	6	-0.72341
NW_023503281.1	2025000	5	-1.51554			NW_023503281.1	2010000	5	-0.919001			NW_023503281.1	2010000	5	-1.17624
NW_023503281.1	2030000	0	nan			NW_023503281.1	2015000	6	-1.3941			NW_023503281.1	2015000	6	-1.56827
NW_023503281.1	2035000	3	-1.43248			NW_023503281.1	2020000	9	-0.567058			NW_023503281.1	2020000	15	-1.52731
NW_023503281.1	2040000	4	-1.8765			NW_023503281.1	2025000	6	0.174311			NW_023503281.1	2025000	8	0.120257
NW_023503281.1	2045000	4	-1.33689			NW_023503281.1	2030000	5	-1.63147			NW_023503281.1	2030000	5	-1.69744
NW_023503281.1	2050000	0	nan			NW_023503281.1	2035000	5	-1.57364			NW_023503281.1	2035000	6	-0.853705
NW_023503281.1	2055000	0	nan			NW_023503281.1	2040000	14	-1.99545			NW_023503281.1	2040000	14	-2.06856
NW_023503281.1	2060000	4	-1.76151			NW_023503281.1	2045000	12	-1.62559			NW_023503281.1	2045000	12	-1.70203
NW_023503281.1	2065000	2	-1.48214			NW_023503281.1	2050000	3	-1.38831			NW_023503281.1	2050000	3	-1.43078
NW_023503281.1	2070000	53	4.11998			NW_023503281.1	2055000	5	-0.86978			NW_023503281.1	2055000	5	-1.19851
NW_023503281.1	2075000	2	-1.30048			NW_023503281.1	2060000	6	-1.14708			NW_023503281.1	2060000	10	-1.86962
NW_023503281.1	2080000	3	-1.43248			NW_023503281.1	2065000	11	-2.19066			NW_023503281.1	2065000	13	-2.31233
NW_023503281.1	2085000	3	-1.57239			NW_023503281.1	2070000	59	3.79547			NW_023503281.1	2070000	60	4.16104
NW_023503281.1	2090000	1	-0.845192			NW_023503281.1	2075000	8	-1.50374			NW_023503281.1	2075000	9	-1.16746
NW_023503281.1	2095000	0	nan			NW_023503281.1	2080000	4	-0.489246			NW_023503281.1	2080000	6	-0.968618
NW_023503281.1	2100000	0	nan			NW_023503281.1	2085000	9	-0.525823			NW_023503281.1	2085000	10	-0.991123
NW_023503281.1	2105000	0	nan			NW_023503281.1	2090000	4	-0.575516			NW_023503281.1	2090000	5	-1.1621
NW_023503281.1	2110000	1	-0.845192			NW_023503281.1	2095000	9	-1.82391			NW_023503281.1	2095000	9	-1.91929
NW_023503281.1	2115000	0	nan			NW_023503281.1	2100000	8	-1.65668			NW_023503281.1	2100000	8	-1.81766
NW_023503281.1	2120000	3	-1.43248			NW_023503281.1	2105000	8	-2.03554			NW_023503281.1	2105000	8	-2.05315
NW_023503281.1	2125000	4	-1.76151			NW_023503281.1	2110000	6	-0.979881			NW_023503281.1	2110000	6	-1.2368
NW_023503281.1	2130000	2	-1.11882			NW_023503281.1	2115000	7	-0.947458			NW_023503281.1	2115000	7	-1.32099
NW_023503281.1	2135000	1	-0.845192			NW_023503281.1	2120000	11	-0.855139			NW_023503281.1	2120000	12	-1.21717
NW_023503281.1	2140000	0	nan			NW_023503281.1	2125000	3	-1.00146			NW_023503281.1	2125000	7	-1.83602
NW_023503281.1	2145000	2	-1.11882			NW_023503281.1	2130000	14	-0.642404			NW_023503281.1	2130000	14	-0.845545
NW_023503281.1	2150000	1	-0.845192			NW_023503281.1	2135000	3	-0.480429			NW_023503281.1	2135000	3	0.555473
NW_023503281.1	2155000	3	-1.43248			NW_023503281.1	2140000	5	-1.49858			NW_023503281.1	2140000	5	-1.61521
NW_023503281.1	2160000	83	-2.86618			NW_023503281.1	2145000	8	-1.19527			NW_023503281.1	2145000	8	-1.38908
NW_023503281.1	2165000	1	-0.338482			NW_023503281.1	2150000	7	-1.18698			NW_023503281.1	2150000	7	-0.774965
NW_023503281.1	2170000	2	-1.11882			NW_023503281.1	2155000	7	-0.715637			NW_023503281.1	2155000	8	-0.516359
NW_023503281.1	2175000	1	-0.845192			NW_023503281.1	2160000	110	3.0071			NW_023503281.1	2160000	110	1.9602
NW_023503281.1	2180000	5	-2.00103			NW_023503281.1	2165000	3	-0.388073			NW_023503281.1	2165000	3	-0.566041
NW_023503281.1	2185000	2	-1.30048			NW_023503281.1	2170000	8	-0.368032			NW_023503281.1	2170000	8	-0.266532
NW_023503281.1	2190000	1	-0.845192			NW_023503281.1	2175000	12	-0.696946			NW_023503281.1	2175000	12	-1.15014
NW_023503281.1	2195000	3	-1.43248			NW_023503281.1	2180000	7	-1.25348			NW_023503281.1	2180000	12	-2.0099
NW_023503281.1	2200000	3	-1.57239			NW_023503281.1	2185000	4	-0.38141			NW_023503281.1	2185000	6	-1.25903
NW_023503281.1	2205000	3	-1.43248			NW_023503281.1	2190000	7	-0.724294			NW_023503281.1	2190000	7	-1.11214
NW_023503281.1	2210000	1	-1.11966			NW_023503281.1	2195000	10	-1.18026			NW_023503281.1	2195000	12	-1.6545
NW_023503281.1	2215000	6	-1.75621			NW_023503281.1	2200000	2	0.245128			NW_023503281.1	2200000	5	-1.25461
NW_023503281.1	2220000	0	nan			NW_023503281.1	2205000	7	-1.02826			NW_023503281.1	2205000	9	-1.54853
NW_023503281.1	2225000	1	-0.845192			NW_023503281.1	2210000	7	-1.62465			NW_023503281.1	2210000	8	-1.86189
NW_023503281.1	2230000	2	-1.11882			NW_023503281.1	2215000	6	0.064285			NW_023503281.1	2215000	11	-1.32899
NW_023503281.1	2235000	0	nan			NW_023503281.1	2220000	7	-0.625988			NW_023503281.1	2220000	7	-1.05238
NW_023503281.1	2240000	4	-1.41651			NW_023503281.1	2225000	4	0.563238			NW_023503281.1	2225000	4	0.256029
NW_023503281.1	2245000	0	nan			NW_023503281.1	2230000	7	-0.939763			NW_023503281.1	2230000	7	0.0829748
NW_023503281.1	2250000	2	-1.48214			NW_023503281.1	2235000	5	-0.922692			NW_023503281.1	2235000	5	-1.23323
NW_023503281.1	2255000	2	-0.485328			NW_023503281.1	2240000	9	-1.41157			NW_023503281.1	2240000	11	-1.53637
NW_023503281.1	2260000	1	-0.845192			NW_023503281.1	2245000	5	-0.992832			NW_023503281.1	2245000	5	-1.27731
NW_023503281.1	2265000	1	-0.845192			NW_023503281.1	2250000	5	-1.43582			NW_023503281.1	2250000	7	-1.83872
NW_023503281.1	2270000	4	-1.53151			NW_023503281.1	2255000	5	-1.18233			NW_023503281.1	2255000	5	-1.10857
NW_023503281.1	2275000	1	0.316017			NW_023503281.1	2260000	4	-0.489246			NW_023503281.1	2260000	4	-0.44384
NW_023503281.1	2280000	1	0.174631			NW_023503281.1	2265000	4	-1.01405			NW_023503281.1	2265000	4	-1.16913
NW_023503281.1	2285000	5	-0.884149			NW_023503281.1	2270000	10	-1.73986			NW_023503281.1	2270000	12	-1.5131
NW_023503281.1	2290000	1	-1.11966			NW_023503281.1	2275000	6	-1.00038			NW_023503281.1	2275000	6	-1.1223
NW_023503281.1	2295000	1	-1.11966			NW_023503281.1	2280000	7	-0.697892			NW_023503281.1	2280000	7	-0.977815
NW_023503281.1	2300000	1	-1.11966			NW_023503281.1	2285000	9	-1.12452			NW_023503281.1	2285000	10	-1.22823
NW_023503281.1	2305000	3	-0.915865			NW_023503281.1	2290000	7	-1.4313			NW_023503281.1	2290000	7	-1.61539
NW_023503281.1	2310000	1	-1.11966			NW_023503281.1	2295000	6	-1.65082			NW_023503281.1	2295000	6	-1.71629
NW_023503281.1	2315000	1	-0.845192			NW_023503281.1	2300000	9	-1.76603			NW_023503281.1	2300000	10	-1.99023
NW_023503281.1	2320000	1	-1.11966			NW_023503281.1	2305000	13	-1.17695			NW_023503281.1	2305000	13	-1.10212
NW_023503281.1	2325000	1	-0.845192			NW_023503281.1	2310000	8	-1.52547			NW_023503281.1	2310000	9	-1.83336
NW_023503281.1	2330000	2	-0.946471			NW_023503281.1	2315000	9	-1.82233			NW_023503281.1	2315000	10	-1.99383
NW_023503281.1	2335000	0	nan			NW_023503281.1	2320000	2	-1.31528			NW_023503281.1	2320000	3	-1.54624
NW_023503281.1	2340000	3	-1.57239			NW_023503281.1	2325000	7	-1.06962			NW_023503281.1	2325000	7	-0.75947
NW_023503281.1	2345000	5	-1.07533			NW_023503281.1	2330000	4	-0.966603			NW_023503281.1	2330000	5	-1.26703
NW_023503281.1	2350000	1	-0.845192			NW_023503281.1	2335000	5	-1.55887			NW_023503281.1	2335000	5	-1.65419
NW_023503281.1	2355000	1	-0.845192			NW_023503281.1	2340000	9	-0.592433			NW_023503281.1	2340000	11	-1.30226
NW_023503281.1	2360000	0	nan			NW_023503281.1	2345000	7	-0.224099			NW_023503281.1	2345000	9	-0.461659
NW_023503281.1	2365000	2	-1.11882			NW_023503281.1	2350000	3	-1.21405			NW_023503281.1	2350000	4	-1.48866
NW_023503281.1	2370000	3	-1.71231			NW_023503281.1	2355000	11	-1.29986			NW_023503281.1	2355000	11	-1.20418
NW_023503281.1	2375000	2	-1.11882			NW_023503281.1	2360000	3	-0.752269			NW_023503281.1	2360000	3	-1.03449
NW_023503281.1	2380000	3	-1.43248			NW_023503281.1	2365000	5	-0.0281013			NW_023503281.1	2365000	5	0.720146
NW_023503281.1	2385000	2	-1.48214			NW_023503281.1	2370000	4	-0.932095			NW_023503281.1	2370000	7	-1.71543
NW_023503281.1	2390000	5	0.916949			NW_023503281.1	2375000	4	0.236853			NW_023503281.1	2375000	4	-0.270866
NW_023503281.1	2395000	0	nan			NW_023503281.1	2380000	9	-0.739132			NW_023503281.1	2380000	10	-1.06519
NW_023503281.1	2400000	5	0.0616793			NW_023503281.1	2385000	2	-0.450636			NW_023503281.1	2385000	4	-1.36653
NW_023503281.1	2405000	0	nan			NW_023503281.1	2390000	15	-0.491984			NW_023503281.1	2390000	15	-0.608744
NW_023503281.1	2410000	2	-1.30048			NW_023503281.1	2395000	1	-0.18789			NW_023503281.1	2395000	1	-0.478312
NW_023503281.1	2415000	1	-0.845192			NW_023503281.1	2400000	10	-0.0486452			NW_023503281.1	2400000	10	0.282127
NW_023503281.1	2420000	4	-1.41651			NW_023503281.1	2405000	4	-1.38069			NW_023503281.1	2405000	4	-1.48866
NW_023503281.1	2425000	1	-0.845192			NW_023503281.1	2410000	6	-0.903294			NW_023503281.1	2410000	8	-1.52878
NW_023503281.1	2430000	0	nan			NW_023503281.1	2415000	3	-0.827199			NW_023503281.1	2415000	4	-1.29425
NW_023503281.1	2435000	0	nan			NW_023503281.1	2420000	13	-1.04135			NW_023503281.1	2420000	13	-1.00546
NW_023503281.1	2440000	3	-0.80465			NW_023503281.1	2425000	10	-0.466706			NW_023503281.1	2425000	10	-0.464696
NW_023503281.1	2445000	5	-1.50447			NW_023503281.1	2430000	4	-1.10032			NW_023503281.1	2430000	4	-1.28677
NW_023503281.1	2450000	1	-0.845192			NW_023503281.1	2435000	7	-1.28413			NW_023503281.1	2435000	7	-1.55206
NW_023503281.1	2455000	0	nan			NW_023503281.1	2440000	12	-1.275			NW_023503281.1	2440000	13	-1.39585
NW_023503281.1	2460000	0	nan			NW_023503281.1	2445000	11	-1.63471			NW_023503281.1	2445000	12	-1.7504
NW_023503281.1	2465000	2	-1.11882			NW_023503281.1	2450000	9	-1.43932			NW_023503281.1	2450000	9	-1.18866
NW_023503281.1	2470000	0	nan			NW_023503281.1	2455000	1	-0.8912			NW_023503281.1	2455000	1	-0.911574
NW_023503281.1	2475000	7	-1.95012			NW_023503281.1	2460000	5	-0.948533			NW_023503281.1	2460000	5	-1.26189
NW_023503281.1	2480000	3	-1.57239			NW_023503281.1	2465000	8	-0.964998			NW_023503281.1	2465000	9	-1.42439
NW_023503281.1	2485000	4	-1.76151			NW_023503281.1	2470000	5	-0.86978			NW_023503281.1	2470000	5	-1.19851
NW_023503281.1	2490000	0	nan			NW_023503281.1	2475000	12	-0.249866			NW_023503281.1	2475000	16	-0.825657
NW_023503281.1	2495000	0	nan			NW_023503281.1	2480000	5	-0.324658			NW_023503281.1	2480000	6	-0.938861
NW_023503281.1	2500000	2	-0.965104			NW_023503281.1	2485000	4	-0.233314			NW_023503281.1	2485000	7	-0.790459
NW_023503281.1	2505000	4	-1.41651			NW_023503281.1	2490000	8	-1.74618			NW_023503281.1	2490000	8	-1.86189
NW_023503281.1	2510000	2	-1.11882			NW_023503281.1	2495000	5	-1.18233			NW_023503281.1	2495000	5	-1.41521
NW_023503281.1	2515000	2	-1.11882			NW_023503281.1	2500000	7	-1.79394			NW_023503281.1	2500000	7	-1.72284
NW_023503281.1	2520000	1	-0.845192			NW_023503281.1	2505000	6	-0.847203			NW_023503281.1	2505000	8	-0.707924
NW_023503281.1	2525000	3	-1.43248			NW_023503281.1	2510000	1	1.70564			NW_023503281.1	2510000	2	0.223931
NW_023503281.1	2530000	3	-0.700611			NW_023503281.1	2515000	7	-0.342414			NW_023503281.1	2515000	7	-0.298668
NW_023503281.1	2535000	1	-0.818519			NW_023503281.1	2520000	6	-0.983117			NW_023503281.1	2520000	6	-0.500425
NW_023503281.1	2540000	0	nan			NW_023503281.1	2525000	10	-0.061778			NW_023503281.1	2525000	11	-0.681087
NW_023503281.1	2545000	1	-0.845192			NW_023503281.1	2530000	5	-0.697506			NW_023503281.1	2530000	5	-0.00234612
NW_023503281.1	2550000	2	-1.30048			NW_023503281.1	2535000	4	-0.796942			NW_023503281.1	2535000	5	-1.27434
NW_023503281.1	2555000	7	-1.02855			NW_023503281.1	2540000	4	-1.21678			NW_023503281.1	2540000	4	-1.38996
NW_023503281.1	2560000	3	-1.29256			NW_023503281.1	2545000	6	-0.913003			NW_023503281.1	2545000	6	-0.580654
NW_023503281.1	2565000	1	-0.845192			NW_023503281.1	2550000	7	-1.44765			NW_023503281.1	2550000	8	-1.09563
NW_023503281.1	2570000	1	-0.845192			NW_023503281.1	2555000	15	-1.05275			NW_023503281.1	2555000	15	-0.50402
NW_023503281.1	2575000	0	nan			NW_023503281.1	2560000	5	-0.0379455			NW_023503281.1	2560000	7	-0.750712
NW_023503281.1	2580000	1	-0.845192			NW_023503281.1	2565000	4	0.336062			NW_023503281.1	2565000	4	0.093524
NW_023503281.1	2585000	4	-1.64651			NW_023503281.1	2570000	7	-1.3784			NW_023503281.1	2570000	8	-1.70235
NW_023503281.1	2590000	1	-1.11966			NW_023503281.1	2575000	5	-0.21391			NW_023503281.1	2575000	5	-0.772376
NW_023503281.1	2595000	1	-0.845192			NW_023503281.1	2580000	6	-0.801898			NW_023503281.1	2580000	6	-1.11815
NW_023503281.1	2600000	0	nan			NW_023503281.1	2585000	9	-0.89614			NW_023503281.1	2585000	11	-1.28771
NW_023503281.1	2605000	0	nan			NW_023503281.1	2590000	2	-1.44362			NW_023503281.1	2590000	3	-1.60577
NW_023503281.1	2610000	3	-1.43248			NW_023503281.1	2595000	6	-1.26573			NW_023503281.1	2595000	6	-0.814562
NW_023503281.1	2615000	0	nan			NW_023503281.1	2600000	3	0.587764			NW_023503281.1	2600000	3	-0.142692
NW_023503281.1	2620000	1	-0.845192			NW_023503281.1	2605000	2	-0.819909			NW_023503281.1	2605000	2	-0.999232
NW_023503281.1	2625000	2	-1.11882			NW_023503281.1	2610000	6	-0.943404			NW_023503281.1	2610000	9	-1.68134
NW_023503281.1	2630000	2	-1.30048			NW_023503281.1	2615000	4	-1.38069			NW_023503281.1	2615000	4	-1.48866
NW_023503281.1	2635000	1	-1.1056			NW_023503281.1	2620000	6	-0.428674			NW_023503281.1	2620000	6	-0.799496
NW_023503281.1	2640000	4	-1.53151			NW_023503281.1	2625000	6	-0.895744			NW_023503281.1	2625000	6	-0.387803
NW_023503281.1	2645000	6	-1.84198			NW_023503281.1	2630000	6	-1.15786			NW_023503281.1	2630000	7	-1.49109
NW_023503281.1	2650000	3	-1.43248			NW_023503281.1	2635000	3	0.092875			NW_023503281.1	2635000	4	-0.82817
NW_023503281.1	2655000	0	nan			NW_023503281.1	2640000	10	-1.89599			NW_023503281.1	2640000	10	-1.29124
NW_023503281.1	2660000	3	-1.43248			NW_023503281.1	2645000	6	-0.404942			NW_023503281.1	2645000	11	-1.38722
NW_023503281.1	2665000	8	0.323228			NW_023503281.1	2650000	10	-1.50493			NW_023503281.1	2650000	11	-1.76117
NW_023503281.1	2670000	2	-1.29118			NW_023503281.1	2655000	9	-1.90163			NW_023503281.1	2655000	9	-1.99349
NW_023503281.1	2675000	0	nan			NW_023503281.1	2660000	7	0.135657			NW_023503281.1	2660000	7	0.349418
NW_023503281.1	2680000	1	0.681974			NW_023503281.1	2665000	14	-0.530423			NW_023503281.1	2665000	15	-0.544828
NW_023503281.1	2685000	0	nan			NW_023503281.1	2670000	5	-0.392336			NW_023503281.1	2670000	7	-1.23312
NW_023503281.1	2690000	2	-1.11882			NW_023503281.1	2675000	4	-0.699168			NW_023503281.1	2675000	4	-1.04302
NW_023503281.1	2695000	2	-0.108029			NW_023503281.1	2680000	3	-0.615879			NW_023503281.1	2680000	3	-0.546413
NW_023503281.1	2700000	0	nan			NW_023503281.1	2685000	1	-0.52602			NW_023503281.1	2685000	1	-0.690333
NW_023503281.1	2705000	2	-1.11882			NW_023503281.1	2690000	6	-0.0446621			NW_023503281.1	2690000	7	-0.819765
NW_023503281.1	2710000	2	-1.30048			NW_023503281.1	2695000	6	-1.14923			NW_023503281.1	2695000	8	-1.45069
NW_023503281.1	2715000	1	-0.845192			NW_023503281.1	2700000	2	-1.44362			NW_023503281.1	2700000	2	-1.37553
NW_023503281.1	2720000	0	nan			NW_023503281.1	2705000	8	-1.18397			NW_023503281.1	2705000	9	-1.47014
NW_023503281.1	2725000	2	-1.11882			NW_023503281.1	2710000	4	-0.834323			NW_023503281.1	2710000	5	-1.25932
NW_023503281.1	2730000	0	nan			NW_023503281.1	2715000	5	-0.594142			NW_023503281.1	2715000	5	-0.242606
NW_023503281.1	2735000	1	-0.845192			NW_023503281.1	2720000	6	-0.73502			NW_023503281.1	2720000	6	-1.16411
NW_023503281.1	2740000	2	-1.11882			NW_023503281.1	2725000	4	-0.154234			NW_023503281.1	2725000	4	-0.510138
NW_023503281.1	2745000	3	-1.29256			NW_023503281.1	2730000	3	-0.808031			NW_023503281.1	2730000	3	-1.05373
NW_023503281.1	2750000	1	-0.845192			NW_023503281.1	2735000	7	-1.52557			NW_023503281.1	2735000	7	-0.92587
NW_023503281.1	2755000	2	-1.30048			NW_023503281.1	2740000	6	-0.159003			NW_023503281.1	2740000	6	-0.0725355
NW_023503281.1	2760000	4	-1.8765			NW_023503281.1	2745000	4	1.53089			NW_023503281.1	2745000	4	1.16676
NW_023503281.1	2765000	0	nan			NW_023503281.1	2750000	7	-0.97824			NW_023503281.1	2750000	8	-1.44734
NW_023503281.1	2770000	1	-0.845192			NW_023503281.1	2755000	4	-1.44252			NW_023503281.1	2755000	6	-1.79012
NW_023503281.1	2775000	2	-1.11882			NW_023503281.1	2760000	6	-1.19346			NW_023503281.1	2760000	10	-1.91694
NW_023503281.1	2780000	0	nan			NW_023503281.1	2765000	0	nan			NW_023503281.1	2765000	0	nan
NW_023503281.1	2785000	1	-0.845192			NW_023503281.1	2770000	4	-0.0348952			NW_023503281.1	2770000	4	-0.160702
NW_023503281.1	2790000	1	-0.845192			NW_023503281.1	2775000	8	-0.344571			NW_023503281.1	2775000	9	-0.839108
NW_023503281.1	2795000	0	nan			NW_023503281.1	2780000	4	-1.76172			NW_023503281.1	2780000	4	-1.72544
NW_023503281.1	2800000	2	-1.30048			NW_023503281.1	2785000	4	-0.338275			NW_023503281.1	2785000	4	-0.597871
NW_023503281.1	2805000	3	-1.29256			NW_023503281.1	2790000	6	-1.02195			NW_023503281.1	2790000	7	-1.4537
NW_023503281.1	2810000	1	-0.845192			NW_023503281.1	2795000	9	-1.67563			NW_023503281.1	2795000	9	-1.8554
NW_023503281.1	2815000	0	nan			NW_023503281.1	2800000	7	-0.859924			NW_023503281.1	2800000	8	-0.719515
NW_023503281.1	2820000	1	-1.11966			NW_023503281.1	2805000	5	-0.200375			NW_023503281.1	2805000	6	0.251018
NW_023503281.1	2825000	1	-0.845192			NW_023503281.1	2810000	6	-0.819157			NW_023503281.1	2810000	6	-0.859009
NW_023503281.1	2830000	2	-1.30048			NW_023503281.1	2815000	2	-1.31528			NW_023503281.1	2815000	2	-1.29903
NW_023503281.1	2835000	2	-1.11882			NW_023503281.1	2820000	1	-0.448542			NW_023503281.1	2820000	2	-1.12604
NW_023503281.1	2840000	0	nan			NW_023503281.1	2825000	5	-0.350142			NW_023503281.1	2825000	5	-0.779587
NW_023503281.1	2845000	2	-1.11882			NW_023503281.1	2830000	9	-0.973851			NW_023503281.1	2830000	10	-1.27813
NW_023503281.1	2850000	0	nan			NW_023503281.1	2835000	3	-1.00146			NW_023503281.1	2835000	4	-0.30925
NW_023503281.1	2855000	0	nan			NW_023503281.1	2840000	4	-0.98817			NW_023503281.1	2840000	4	-1.24789
NW_023503281.1	2860000	2	-1.30048			NW_023503281.1	2845000	6	-0.757672			NW_023503281.1	2845000	7	-1.00132
NW_023503281.1	2865000	1	-0.845192			NW_023503281.1	2850000	3	-1.47718			NW_023503281.1	2850000	3	-1.48671
NW_023503281.1	2870000	0	nan			NW_023503281.1	2855000	1	-1.08393			NW_023503281.1	2855000	1	-1.02565
NW_023503281.1	2875000	0	nan			NW_023503281.1	2860000	5	-1.37306			NW_023503281.1	2860000	7	-1.77404
NW_023503281.1	2880000	1	-0.845192			NW_023503281.1	2865000	6	-0.732862			NW_023503281.1	2865000	6	-1.08049
NW_023503281.1	2885000	4	-1.04497			NW_023503281.1	2870000	5	-0.397258			NW_023503281.1	2870000	5	-0.890151
NW_023503281.1	2890000	0	nan			NW_023503281.1	2875000	2	-1.31528			NW_023503281.1	2875000	2	-1.29903
NW_023503281.1	2895000	2	-1.11882			NW_023503281.1	2880000	7	-0.327986			NW_023503281.1	2880000	8	-1.06177
NW_023503281.1	2900000	5	-0.562794			NW_023503281.1	2885000	3	-1.0154			NW_023503281.1	2885000	6	-1.44208
NW_023503281.1	2905000	2	-1.11882			NW_023503281.1	2890000	5	-0.77626			NW_023503281.1	2890000	5	-1.12998
NW_023503281.1	2910000	1	-0.845192			NW_023503281.1	2895000	4	-1.29874			NW_023503281.1	2895000	5	-1.50001
NW_023503281.1	2915000	2	-0.629727			NW_023503281.1	2900000	12	-1.38018			NW_023503281.1	2900000	13	-1.4556
NW_023503281.1	2920000	2	-1.11882			NW_023503281.1	2905000	9	-0.37143			NW_023503281.1	2905000	11	-1.16104
NW_023503281.1	2925000	2	-1.30048			NW_023503281.1	2910000	3	-0.426409			NW_023503281.1	2910000	4	-1.05398
NW_023503281.1	2930000	6	-1.16683			NW_023503281.1	2915000	4	0.541671			NW_023503281.1	2915000	5	0.386523
NW_023503281.1	2935000	0	nan			NW_023503281.1	2920000	4	-0.562575			NW_023503281.1	2920000	5	-0.759957
NW_023503281.1	2940000	0	nan			NW_023503281.1	2925000	6	0.216379			NW_023503281.1	2925000	7	-0.461701
NW_023503281.1	2945000	1	-0.845192			NW_023503281.1	2930000	12	-0.418198			NW_023503281.1	2930000	14	-0.572311
NW_023503281.1	2950000	1	1.63206			NW_023503281.1	2935000	6	-1.36497			NW_023503281.1	2935000	6	-1.57392
NW_023503281.1	2955000	2	0.669859			NW_023503281.1	2940000	5	-1.56133			NW_023503281.1	2940000	5	-1.65504
NW_023503281.1	2960000	1	-0.845192			NW_023503281.1	2945000	3	0.446616			NW_023503281.1	2945000	3	0.317339
NW_023503281.1	2965000	1	-0.845192			NW_023503281.1	2950000	6	-0.585083			NW_023503281.1	2950000	6	-0.476695
NW_023503281.1	2970000	1	-0.845192			NW_023503281.1	2955000	13	-1.36973			NW_023503281.1	2955000	13	-1.44032
NW_023503281.1	2975000	0	nan			NW_023503281.1	2960000	5	-0.975605			NW_023503281.1	2960000	6	-1.41609
NW_023503281.1	2980000	0	nan			NW_023503281.1	2965000	4	-1.76172			NW_023503281.1	2965000	5	-1.82121
NW_023503281.1	2985000	1	-0.845192			NW_023503281.1	2970000	2	-0.450636			NW_023503281.1	2970000	3	-1.05253
NW_023503281.1	2990000	1	-0.845192			NW_023503281.1	2975000	7	-1.25239			NW_023503281.1	2975000	7	-1.5268
NW_023503281.1	2995000	1	-0.845192			NW_023503281.1	2980000	2	-0.322291			NW_023503281.1	2980000	2	-0.666204
NW_023503281.1	3000000	2	-1.30048			NW_023503281.1	2985000	8	-1.4099			NW_023503281.1	2985000	8	-0.946464
NW_023503281.1	3005000	2	-1.11882			NW_023503281.1	2990000	5	-1.09989			NW_023503281.1	2990000	5	-0.443465
NW_023503281.1	3010000	0	nan			NW_023503281.1	2995000	7	-0.789704			NW_023503281.1	2995000	7	-0.509869
NW_023503281.1	3015000	2	-1.29118			NW_023503281.1	3000000	6	-0.649804			NW_023503281.1	3000000	7	-0.972692
NW_023503281.1	3020000	2	-1.19167			NW_023503281.1	3005000	5	-0.875932			NW_023503281.1	3005000	6	-1.00365
NW_023503280.1	0	1	0.506034			NW_023503281.1	3010000	3	-1.5765			NW_023503281.1	3010000	3	-1.54624
NW_023503280.1	5000	2	-1.11882			NW_023503281.1	3015000	6	-0.363952			NW_023503281.1	3015000	7	-0.810587
NW_023503280.1	10000	2	-1.11882			NW_023503281.1	3020000	3	-1.28201			NW_023503281.1	3020000	5	-1.69649
NW_023503280.1	15000	1	-0.845192			NW_023503280.1	0	10	-1.53424			NW_023503280.1	0	10	-1.62321
NW_023503280.1	20000	1	-0.845192			NW_023503280.1	5000	6	-0.589397			NW_023503280.1	5000	7	-1.07408
NW_023503280.1	25000	2	-1.11882			NW_023503280.1	10000	5	-0.992832			NW_023503280.1	10000	7	-1.53758
NW_023503280.1	30000	2	-1.11882			NW_023503280.1	15000	6	-0.918396			NW_023503280.1	15000	6	-1.19349
NW_023503280.1	35000	3	-1.43248			NW_023503280.1	20000	5	-0.686432			NW_023503280.1	20000	5	-0.292714
NW_023503280.1	40000	2	-1.48214			NW_023503280.1	25000	10	-0.450655			NW_023503280.1	25000	10	-0.766614
NW_023503280.1	45000	2	-1.11882			NW_023503280.1	30000	9	-1.29659			NW_023503280.1	30000	11	-1.75043
NW_023503280.1	50000	3	-1.25042			NW_023503280.1	35000	8	-1.21265			NW_023503280.1	35000	10	-1.15906
NW_023503280.1	55000	3	-1.25177			NW_023503280.1	40000	7	-0.63676			NW_023503280.1	40000	9	-1.41853
NW_023503280.1	60000	16	-1.37901			NW_023503280.1	45000	6	-0.621758			NW_023503280.1	45000	6	-0.911365
NW_023503280.1	65000	5	-0.740765			NW_023503280.1	50000	10	-1.08307			NW_023503280.1	50000	10	-0.536428
NW_023503280.1	70000	0	nan			NW_023503280.1	55000	12	-1.22976			NW_023503280.1	55000	15	-1.76843
NW_023503280.1	75000	1	-0.338482			NW_023503280.1	60000	21	-1.25664			NW_023503280.1	60000	25	-1.25403
NW_023503280.1	80000	2	-1.11882			NW_023503280.1	65000	19	-0.638299			NW_023503280.1	65000	21	-1.1388
NW_023503280.1	85000	2	-1.11882			NW_023503280.1	70000	3	-1.47718			NW_023503280.1	70000	3	-1.48671
NW_023503280.1	90000	1	-1.11966			NW_023503280.1	75000	6	-0.422201			NW_023503280.1	75000	7	-1.03198
NW_023503280.1	95000	0	nan			NW_023503280.1	80000	8	-0.438417			NW_023503280.1	80000	8	-0.0270768
NW_023503280.1	100000	6	-1.84638			NW_023503280.1	85000	7	-0.451562			NW_023503280.1	85000	8	-0.612871
NW_023503280.1	105000	2	-1.11882			NW_023503280.1	90000	8	-0.827973			NW_023503280.1	90000	9	-1.45402
NW_023503280.1	110000	2	-1.30048			NW_023503280.1	95000	4	-1.76172			NW_023503280.1	95000	4	-1.72544
NW_023503280.1	115000	4	-1.08036			NW_023503280.1	100000	16	-1.63645			NW_023503280.1	100000	16	-1.78091
NW_023503280.1	120000	0	nan			NW_023503280.1	105000	10	-1.08906			NW_023503280.1	105000	11	-1.13426
NW_023503280.1	125000	1	0.111926			NW_023503280.1	110000	6	-1.08128			NW_023503280.1	110000	7	-1.45505
NW_023503280.1	130000	2	-1.30048			NW_023503280.1	115000	8	-1.48984			NW_023503280.1	115000	11	-1.80078
NW_023503280.1	135000	0	nan			NW_023503280.1	120000	5	-0.476012			NW_023503280.1	120000	5	-0.91756
NW_023503280.1	140000	2	-1.11882			NW_023503280.1	125000	8	-1.40034			NW_023503280.1	125000	8	-1.46595
NW_023503280.1	145000	3	-1.57239			NW_023503280.1	130000	9	-1.04839			NW_023503280.1	130000	10	-1.18092
NW_023503280.1	150000	1	-0.845192			NW_023503280.1	135000	5	-0.265592			NW_023503280.1	135000	5	-0.790364
NW_023503280.1	155000	4	-1.13048			NW_023503280.1	140000	5	-0.420638			NW_023503280.1	140000	6	-0.941121
NW_023503280.1	160000	1	-0.845192			NW_023503280.1	145000	7	-1.40533			NW_023503280.1	145000	8	-1.65171
NW_023503280.1	165000	2	-1.30048			NW_023503280.1	150000	2	0.245128			NW_023503280.1	150000	2	1.39223
NW_023503280.1	170000	1	-0.845192			NW_023503280.1	155000	14	-1.32031			NW_023503280.1	155000	15	-1.57819
NW_023503280.1	175000	0	nan			NW_023503280.1	160000	7	-0.413596			NW_023503280.1	160000	8	-1.10173
NW_023503280.1	180000	3	-1.57239			NW_023503280.1	165000	5	-0.506775			NW_023503280.1	165000	6	-1.09518
NW_023503280.1	185000	5	-1.80482			NW_023503280.1	170000	4	0.226788			NW_023503280.1	170000	4	0.0137668
NW_023503280.1	190000	3	-1.29256			NW_023503280.1	175000	5	-0.343115			NW_023503280.1	175000	5	-0.835332
NW_023503280.1	195000	1	-0.845192			NW_023503280.1	180000	5	-0.509236			NW_023503280.1	180000	7	-1.29876
NW_023503280.1	200000	3	-0.0548475			NW_023503280.1	185000	5	-0.062556			NW_023503280.1	185000	7	-0.956523
NW_023503280.1	205000	1	0.111926			NW_023503280.1	190000	7	-0.832991			NW_023503280.1	190000	7	-0.814038
NW_023503280.1	210000	1	-1.11966			NW_023503280.1	195000	1	1.097			NW_023503280.1	195000	1	0.600234
NW_023503280.1	215000	1	-0.845192			NW_023503280.1	200000	3	0.0562812			NW_023503280.1	200000	3	0.266225
NW_023503280.1	220000	3	-0.212701			NW_023503280.1	205000	2	-0.043085			NW_023503280.1	205000	2	-0.134595
NW_023503280.1	225000	0	nan			NW_023503280.1	210000	5	-0.793487			NW_023503280.1	210000	6	-1.33436
NW_023503280.1	230000	1	0.111926			NW_023503280.1	215000	7	-0.449187			NW_023503280.1	215000	7	-0.945744
NW_023503280.1	235000	3	-1.43248			NW_023503280.1	220000	9	-1.24505			NW_023503280.1	220000	11	-1.49365
NW_023503280.1	240000	3	-1.29256			NW_023503280.1	225000	5	-0.627366			NW_023503280.1	225000	5	-1.06017
NW_023503280.1	245000	0	nan			NW_023503280.1	230000	7	-0.703132			NW_023503280.1	230000	7	-0.996944
NW_023503280.1	250000	3	-1.29974			NW_023503280.1	235000	7	-1.63715			NW_023503280.1	235000	10	-1.99074
NW_023503280.1	255000	2	-0.173253			NW_023503280.1	240000	5	0.50786			NW_023503280.1	240000	6	0.133258
NW_023503280.1	260000	1	-0.845192			NW_023503280.1	245000	6	-1.18159			NW_023503280.1	245000	6	-1.4466
NW_023503280.1	265000	0	nan			NW_023503280.1	250000	11	-0.760517			NW_023503280.1	250000	13	-1.40462
NW_023503280.1	270000	2	-1.30048			NW_023503280.1	255000	3	-1.37785			NW_023503280.1	255000	5	-1.42107
NW_023503280.1	275000	2	-1.30048			NW_023503280.1	260000	4	-0.890398			NW_023503280.1	260000	5	-1.34583
NW_023503280.1	280000	2	-1.11882			NW_023503280.1	265000	7	-0.88301			NW_023503280.1	265000	7	-1.28427
NW_023503280.1	285000	1	-0.845192			NW_023503280.1	270000	5	-1.90219			NW_023503280.1	270000	7	-2.03206
NW_023503280.1	290000	0	nan			NW_023503280.1	275000	5	0.30291			NW_023503280.1	275000	6	-0.363696
NW_023503280.1	295000	4	-1.64651			NW_023503280.1	280000	5	-1.42598			NW_023503280.1	280000	6	-0.866919
NW_023503280.1	300000	3	-1.29256			NW_023503280.1	285000	6	-0.454562			NW_023503280.1	285000	6	-0.904962
NW_023503280.1	305000	3	-1.43248			NW_023503280.1	290000	7	-1.63523			NW_023503280.1	290000	7	-1.77404
NW_023503280.1	310000	0	nan			NW_023503280.1	295000	5	-0.304969			NW_023503280.1	295000	8	-1.25089
NW_023503280.1	315000	0	nan			NW_023503280.1	300000	10	-0.634515			NW_023503280.1	300000	11	-0.50879
NW_023503280.1	320000	0	nan			NW_023503280.1	305000	7	-1.21102			NW_023503280.1	305000	9	-1.66068
NW_023503280.1	325000	1	-0.845192			NW_023503280.1	310000	5	-0.830403			NW_023503280.1	310000	5	-1.1848
NW_023503280.1	330000	3	-0.309565			NW_023503280.1	315000	6	-0.796505			NW_023503280.1	315000	6	-1.2014
NW_023503280.1	335000	4	-1.61706			NW_023503280.1	320000	3	-1.00146			NW_023503280.1	320000	3	-1.19625
NW_023503280.1	340000	2	-1.30048			NW_023503280.1	325000	7	-0.934953			NW_023503280.1	325000	7	-1.00334
NW_023503280.1	345000	1	-0.845192			NW_023503280.1	330000	9	-1.75731			NW_023503280.1	330000	11	-1.69435
NW_023503280.1	350000	2	-1.30048			NW_023503280.1	335000	8	-1.49494			NW_023503280.1	335000	10	-1.59256
NW_023503280.1	355000	0	nan			NW_023503280.1	340000	7	-0.375119			NW_023503280.1	340000	8	-1.06604
NW_023503280.1	360000	1	-0.845192			NW_023503280.1	345000	7	-1.01479			NW_023503280.1	345000	7	-1.29876
NW_023503280.1	365000	2	-1.30048			NW_023503280.1	350000	6	-1.89029			NW_023503280.1	350000	8	-2.05132
NW_023503280.1	370000	2	-1.30048			NW_023503280.1	355000	4	-1.01836			NW_023503280.1	355000	4	-1.23742
NW_023503280.1	375000	2	-1.48214			NW_023503280.1	360000	4	-1.67976			NW_023503280.1	360000	5	-1.77881
NW_023503280.1	380000	3	-1.43248			NW_023503280.1	365000	5	-0.756571			NW_023503280.1	365000	6	-0.629997
NW_023503280.1	385000	2	0.520803			NW_023503280.1	370000	7	-0.943611			NW_023503280.1	370000	8	-1.41287
NW_023503280.1	390000	2	-1.11882			NW_023503280.1	375000	11	-1.26945			NW_023503280.1	375000	13	-1.79105
NW_023503280.1	395000	4	-1.42241			NW_023503280.1	380000	7	-1.73911			NW_023503280.1	380000	9	-1.94272
NW_023503280.1	400000	1	-0.845192			NW_023503280.1	385000	6	-1.71231			NW_023503280.1	385000	7	-1.37017
NW_023503280.1	405000	0	nan			NW_023503280.1	390000	9	-1.1824			NW_023503280.1	390000	11	-1.67597
NW_023503280.1	410000	3	-0.140949			NW_023503280.1	395000	5	-1.46289			NW_023503280.1	395000	7	-1.66288
NW_023503280.1	415000	3	-1.29256			NW_023503280.1	400000	6	-0.130957			NW_023503280.1	400000	6	-0.697043
NW_023503280.1	420000	3	-1.29256			NW_023503280.1	405000	6	-1.65082			NW_023503280.1	405000	6	-1.75283
NW_023503280.1	425000	6	-0.705005			NW_023503280.1	410000	12	-0.880815			NW_023503280.1	410000	13	-1.03824
NW_023503280.1	430000	1	-0.845192			NW_023503280.1	415000	4	-0.867393			NW_023503280.1	415000	4	-0.061504
NW_023503280.1	435000	2	-0.946471			NW_023503280.1	420000	9	-1.49087			NW_023503280.1	420000	10	-0.953319
NW_023503280.1	440000	4	-1.41651			NW_023503280.1	425000	7	1.13605			NW_023503280.1	425000	9	0.281242
NW_023503280.1	445000	1	-0.845192			NW_023503280.1	430000	5	-0.603986			NW_023503280.1	430000	5	-0.958674
NW_023503280.1	450000	1	0.506034			NW_023503280.1	435000	5	-0.979296			NW_023503280.1	435000	5	-1.09572
NW_023503280.1	455000	3	-0.80465			NW_023503280.1	440000	9	-0.333925			NW_023503280.1	440000	10	-0.75967
NW_023503280.1	460000	0	nan			NW_023503280.1	445000	4	-0.890398			NW_023503280.1	445000	5	-1.34583
NW_023503280.1	465000	5	-1.90293			NW_023503280.1	450000	4	-1.52448			NW_023503280.1	450000	4	-1.2135
NW_023503280.1	470000	1	-1.11966			NW_023503280.1	455000	8	-1.12575			NW_023503280.1	455000	8	-1.19263
NW_023503280.1	475000	1	-1.11966			NW_023503280.1	460000	1	-1.08393			NW_023503280.1	460000	1	-1.02565
NW_023503280.1	480000	3	-1.43248			NW_023503280.1	465000	7	0.0413896			NW_023503280.1	465000	11	-1.21659
NW_023503280.1	485000	1	-0.845192			NW_023503280.1	470000	4	-1.37145			NW_023503280.1	470000	5	-1.65553
NW_023503280.1	490000	0	nan			NW_023503280.1	475000	9	-1.70418			NW_023503280.1	475000	10	-1.94857
NW_023503280.1	495000	0	nan			NW_023503280.1	480000	6	-1.17512			NW_023503280.1	480000	8	-1.38603
NW_023503280.1	500000	1	-0.845192			NW_023503280.1	485000	7	-0.552112			NW_023503280.1	485000	8	-1.1969
NW_023503280.1	505000	2	0.558067			NW_023503280.1	490000	4	-0.683352			NW_023503280.1	490000	4	-1.0166
NW_023503280.1	510000	4	-1.28307			NW_023503280.1	495000	5	-1.50596			NW_023503280.1	495000	5	-1.61778
NW_023503280.1	515000	2	-1.11882			NW_023503280.1	500000	3	-1.11472			NW_023503280.1	500000	3	-1.14273
NW_023503280.1	520000	0	nan			NW_023503280.1	505000	6	-0.555958			NW_023503280.1	505000	6	-0.0258292
NW_023503280.1	525000	0	nan			NW_023503280.1	510000	6	-0.706825			NW_023503280.1	510000	7	0.46629
NW_023503280.1	530000	1	-0.845192			NW_023503280.1	515000	13	-1.6816			NW_023503280.1	515000	13	-1.84428
NW_023503280.1	535000	2	-1.11882			NW_023503280.1	520000	6	-1.54943			NW_023503280.1	520000	6	-1.68579
NW_023503280.1	540000	0	nan			NW_023503280.1	525000	12	-1.16418			NW_023503280.1	525000	12	-1.55942
NW_023503280.1	545000	3	-1.43248			NW_023503280.1	530000	6	-1.21611			NW_023503280.1	530000	6	-0.584798
NW_023503280.1	550000	0	nan			NW_023503280.1	535000	7	-0.0615352			NW_023503280.1	535000	8	-0.616717
NW_023503280.1	555000	4	-1.81827			NW_023503280.1	540000	4	-1.76172			NW_023503280.1	540000	4	-1.72544
NW_023503280.1	560000	1	-0.845192			NW_023503280.1	545000	6	-1.07804			NW_023503280.1	545000	8	-1.56234
NW_023503280.1	565000	1	-0.845192			NW_023503280.1	550000	4	-1.76172			NW_023503280.1	550000	4	-1.72544
NW_023503280.1	570000	2	-1.30048			NW_023503280.1	555000	3	-0.656428			NW_023503280.1	555000	7	-1.70746
NW_023503280.1	575000	4	-0.976092			NW_023503280.1	560000	3	-0.222529			NW_023503280.1	560000	3	-0.115631
NW_023503280.1	580000	1	-0.845192			NW_023503280.1	565000	9	-0.899312			NW_023503280.1	565000	9	-1.2849
NW_023503280.1	585000	0	nan			NW_023503280.1	570000	8	-1.28216			NW_023503280.1	570000	8	-1.47357
NW_023503280.1	590000	1	-0.949091			NW_023503280.1	575000	9	-0.597984			NW_023503280.1	575000	12	-1.10845
NW_023503280.1	595000	5	-1.90293			NW_023503280.1	580000	5	-1.39275			NW_023503280.1	580000	5	-0.754389
NW_023503280.1	600000	1	-0.845192			NW_023503280.1	585000	6	-1.48363			NW_023503280.1	585000	6	-1.64699
NW_023503280.1	605000	3	-1.53882			NW_023503280.1	590000	4	-1.1618			NW_023503280.1	590000	4	-1.25987
NW_023503280.1	610000	3	-1.57239			NW_023503280.1	595000	11	-1.34389			NW_023503280.1	595000	15	-1.94251
NW_023503280.1	615000	1	-1.11966			NW_023503280.1	600000	19	-1.92014			NW_023503280.1	600000	19	-1.85787
NW_023503280.1	620000	0	nan			NW_023503280.1	605000	6	-1.59581			NW_023503280.1	605000	8	-1.22243
NW_023503280.1	625000	19	-2.52543			NW_023503280.1	610000	8	-1.17007			NW_023503280.1	610000	10	-1.67134
NW_023503280.1	630000	1	-0.5848			NW_023503280.1	615000	5	-1.90219			NW_023503280.1	615000	6	-1.97431
NW_023503280.1	635000	5	-1.32436			NW_023503280.1	620000	7	-1.57559			NW_023503280.1	620000	7	-1.72486
NW_023503280.1	640000	0	nan			NW_023503280.1	625000	7	-1.08501			NW_023503280.1	625000	24	-2.14666
NW_023503280.1	645000	8	-2.17642			NW_023503280.1	630000	6	-1.60228			NW_023503280.1	630000	6	-1.61949
NW_023503280.1	650000	1	-0.845192			NW_023503280.1	635000	7	-0.693513			NW_023503280.1	635000	8	-0.277819
NW_023503280.1	655000	1	-0.338482			NW_023503280.1	640000	2	-0.718584			NW_023503280.1	640000	2	-0.932008
NW_023503280.1	660000	2	-1.11882			NW_023503280.1	645000	12	-1.01431			NW_023503280.1	645000	17	-1.65295
NW_023503280.1	665000	5	-1.70672			NW_023503280.1	650000	4	-1.84367			NW_023503280.1	650000	5	-1.86361
NW_023503280.1	670000	3	-0.0297345			NW_023503280.1	655000	2	1.25162			NW_023503280.1	655000	2	0.938666
NW_023503280.1	675000	1	-0.845192			NW_023503280.1	660000	9	-0.889796			NW_023503280.1	660000	10	-1.37559
NW_023503280.1	680000	1	-0.845192			NW_023503280.1	665000	28	-0.286789			NW_023503280.1	665000	29	-0.734039
NW_023503280.1	685000	2	-1.11882			NW_023503280.1	670000	22	-1.84238			NW_023503280.1	670000	24	-1.9674
NW_023503280.1	690000	0	nan			NW_023503280.1	675000	7	-0.672488			NW_023503280.1	675000	7	-0.836387
NW_023503280.1	695000	4	-1.41651			NW_023503280.1	680000	8	-1.30724			NW_023503280.1	680000	8	-1.29601
NW_023503280.1	700000	6	-1.01729			NW_023503280.1	685000	11	-0.810531			NW_023503280.1	685000	11	-1.05623
NW_023503280.1	705000	1	0.506034			NW_023503280.1	690000	5	-1.76929			NW_023503280.1	690000	5	-1.78138
NW_023503280.1	710000	2	-1.30048			NW_023503280.1	695000	9	-0.938168			NW_023503280.1	695000	11	-0.814963
NW_023503280.1	715000	0	nan			NW_023503280.1	700000	11	-1.27283			NW_023503280.1	700000	13	-0.867679
NW_023503280.1	720000	0	nan			NW_023503280.1	705000	13	-1.21586			NW_023503280.1	705000	13	-1.48646
NW_023503280.1	725000	1	-0.845192			NW_023503280.1	710000	17	-1.22452			NW_023503280.1	710000	18	-1.58373
NW_023503280.1	730000	2	0.381062			NW_023503280.1	715000	5	-1.05928			NW_023503280.1	715000	5	-1.33641
NW_023503280.1	735000	1	-1.11966			NW_023503280.1	720000	5	-1.69177			NW_023503280.1	720000	5	-1.73641
NW_023503280.1	740000	0	nan			NW_023503280.1	725000	7	-1.24661			NW_023503280.1	725000	7	-1.19737
NW_023503280.1	745000	1	-1.11966			NW_023503280.1	730000	5	-1.43336			NW_023503280.1	730000	6	-1.09518
NW_023503280.1	750000	2	-1.48214			NW_023503280.1	735000	5	-1.62901			NW_023503280.1	735000	6	-1.82741
NW_023503280.1	755000	9	-2.11304			NW_023503280.1	740000	4	-1.36344			NW_023503280.1	740000	4	-1.48268
NW_023503280.1	760000	2	-1.11882			NW_023503280.1	745000	7	-1.9036			NW_023503280.1	745000	8	-2.02722
NW_023503280.1	765000	4	-1.68415			NW_023503280.1	750000	4	-1.10032			NW_023503280.1	750000	6	-1.64285
NW_023503280.1	770000	2	-1.30048			NW_023503280.1	755000	6	-1.72741			NW_023503280.1	755000	15	-2.31738
NW_023503280.1	775000	1	-0.845192			NW_023503280.1	760000	3	1.8215			NW_023503280.1	760000	3	1.35346
NW_023503280.1	780000	6	-1.67045			NW_023503280.1	765000	7	-0.00424831			NW_023503280.1	765000	8	-0.256655
NW_023503280.1	785000	0	nan			NW_023503280.1	770000	5	-1.83205			NW_023503280.1	770000	6	-1.86244
NW_023503280.1	790000	0	nan			NW_023503280.1	775000	6	-1.42861			NW_023503280.1	775000	6	-1.54567
NW_023503280.1	795000	10	-2.11856			NW_023503280.1	780000	14	-0.814237			NW_023503280.1	780000	15	-1.13014
NW_023503280.1	800000	3	-1.71231			NW_023503280.1	785000	4	-1.84367			NW_023503280.1	785000	4	-1.77479
NW_023503280.1	805000	1	-1.09011			NW_023503280.1	790000	2	-1.44362			NW_023503280.1	790000	2	-1.37553
NW_023503280.1	810000	1	-0.5848			NW_023503280.1	795000	4	-1.10032			NW_023503280.1	795000	14	-2.17881
NW_023503280.1	815000	1	-1.11966			NW_023503280.1	800000	18	-1.94697			NW_023503280.1	800000	21	-2.25854
NW_023503280.1	820000	1	-0.845192			NW_023503280.1	805000	7	-1.56982			NW_023503280.1	805000	8	-1.83044
NW_023503280.1	825000	1	-1.11966			NW_023503280.1	810000	5	-1.24017			NW_023503280.1	810000	5	-1.33898
NW_023503280.1	830000	2	-1.30048			NW_023503280.1	815000	5	-0.610139			NW_023503280.1	815000	6	-1.1675
NW_023503280.1	835000	2	-1.30048			NW_023503280.1	820000	2	-1.44362			NW_023503280.1	820000	3	-1.54624
NW_023503280.1	840000	2	-1.11882			NW_023503280.1	825000	4	-1.38069			NW_023503280.1	825000	5	-1.66018
NW_023503280.1	845000	2	-1.11882			NW_023503280.1	830000	4	-1.24842			NW_023503280.1	830000	5	-0.796788
NW_023503280.1	850000	3	-1.29256			NW_023503280.1	835000	4	-0.746616			NW_023503280.1	835000	5	-0.31584
NW_023503280.1	855000	4	-1.30741			NW_023503280.1	840000	8	-1.1692			NW_023503280.1	840000	9	-1.51282
NW_023503280.1	860000	1	-1.11966			NW_023503280.1	845000	9	-0.309166			NW_023503280.1	845000	9	-0.5957
NW_023503280.1	865000	1	-1.11966			NW_023503280.1	850000	8	-1.48723			NW_023503280.1	850000	10	-1.23852
NW_023503280.1	870000	2	-1.30048			NW_023503280.1	855000	6	-0.232353			NW_023503280.1	855000	7	0.0341325
NW_023503280.1	875000	0	nan			NW_023503280.1	860000	13	-1.00657			NW_023503280.1	860000	14	-1.55286
NW_023503280.1	880000	1	-0.845192			NW_023503280.1	865000	4	-1.60068			NW_023503280.1	865000	5	-1.77967
NW_023503280.1	885000	2	-1.30048			NW_023503280.1	870000	5	-0.968221			NW_023503280.1	870000	6	-1.36826
NW_023503280.1	890000	1	-0.845192			NW_023503280.1	875000	6	-1.77379			NW_023503280.1	875000	6	-1.82741
NW_023503280.1	895000	2	-1.30048			NW_023503280.1	880000	8	-0.440155			NW_023503280.1	880000	8	-0.735377
NW_023503280.1	900000	0	nan			NW_023503280.1	885000	6	-1.71446			NW_023503280.1	885000	7	-1.83535
NW_023503280.1	905000	0	nan			NW_023503280.1	890000	3	-0.675596			NW_023503280.1	890000	4	-1.18807
NW_023503280.1	910000	1	-0.845192			NW_023503280.1	895000	5	-0.200375			NW_023503280.1	895000	6	-0.301547
NW_023503280.1	915000	3	-1.57239			NW_023503280.1	900000	2	-1.31528			NW_023503280.1	900000	2	-1.29903
NW_023503280.1	920000	3	-1.57239			NW_023503280.1	905000	3	-0.557102			NW_023503280.1	905000	3	-0.866114
NW_023503280.1	925000	2	-0.406142			NW_023503280.1	910000	8	-1.38383			NW_023503280.1	910000	8	-0.960496
NW_023503280.1	930000	5	-0.896726			NW_023503280.1	915000	8	-0.888531			NW_023503280.1	915000	9	-0.824601
NW_023503280.1	935000	8	-2.24522			NW_023503280.1	920000	8	-1.47507			NW_023503280.1	920000	10	-1.8259
NW_023503280.1	940000	1	-0.845192			NW_023503280.1	925000	4	-0.808442			NW_023503280.1	925000	5	-1.08202
NW_023503280.1	945000	2	-0.946471			NW_023503280.1	930000	5	-0.506775			NW_023503280.1	930000	8	-0.711584
NW_023503280.1	950000	1	-0.5848			NW_023503280.1	935000	7	-1.42745			NW_023503280.1	935000	13	-2.09292
NW_023503280.1	955000	2	-1.11882			NW_023503280.1	940000	2	0.902614			NW_023503280.1	940000	2	0.829718
NW_023503280.1	960000	4	-1.76151			NW_023503280.1	945000	4	-0.847264			NW_023503280.1	945000	4	-0.940328
NW_023503280.1	965000	1	1.69539			NW_023503280.1	950000	6	-1.60228			NW_023503280.1	950000	6	-1.61949
NW_023503280.1	970000	3	-1.43248			NW_023503280.1	955000	7	-0.363576			NW_023503280.1	955000	8	-0.838176
NW_023503280.1	975000	0	nan			NW_023503280.1	960000	11	-1.25593			NW_023503280.1	960000	11	-1.31777
NW_023503280.1	980000	5	-1.06526			NW_023503280.1	965000	9	-1.64788			NW_023503280.1	965000	9	-1.34767
NW_023503280.1	985000	4	0.998476			NW_023503280.1	970000	6	-0.739334			NW_023503280.1	970000	7	-0.673238
NW_023503280.1	990000	5	-1.60861			NW_023503280.1	975000	7	-0.84261			NW_023503280.1	975000	7	-1.24183
NW_023503280.1	995000	6	-1.46592			NW_023503280.1	980000	9	-1.06821			NW_023503280.1	980000	10	-1.22489
NW_023503280.1	1000000	2	-1.30048			NW_023503280.1	985000	15	-1.01979			NW_023503280.1	985000	15	-0.667234
NW_023503280.1	1005000	1	-1.11966			NW_023503280.1	990000	11	-1.45058			NW_023503280.1	990000	13	-1.76871
NW_023503280.1	1010000	3	-0.983532			NW_023503280.1	995000	18	-1.42372			NW_023503280.1	995000	19	-1.68407
NW_023503280.1	1015000	2	-1.30048			NW_023503280.1	1000000	7	-1.30144			NW_023503280.1	1000000	8	-1.38603
NW_023503280.1	1020000	2	-1.30048			NW_023503280.1	1005000	4	-0.972354			NW_023503280.1	1005000	5	-1.43063
NW_023503280.1	1025000	0	nan			NW_023503280.1	1010000	11	-0.601687			NW_023503280.1	1010000	11	-0.651424
NW_023503280.1	1030000	3	-1.70514			NW_023503280.1	1015000	5	-1.69177			NW_023503280.1	1015000	7	-1.93202
NW_023503280.1	1035000	4	-1.52562			NW_023503280.1	1020000	12	-1.45068			NW_023503280.1	1020000	12	-1.03569
NW_023503280.1	1040000	1	-1.11966			NW_023503280.1	1025000	4	-1.28724			NW_023503280.1	1025000	4	-1.43532
NW_023503280.1	1045000	0	nan			NW_023503280.1	1030000	5	-0.608909			NW_023503280.1	1030000	8	-1.55166
NW_023503280.1	1050000	4	-0.0689531			NW_023503280.1	1035000	4	-0.476518			NW_023503280.1	1035000	5	-0.799929
NW_023503280.1	1055000	2	-1.11882			NW_023503280.1	1040000	3	-1.28898			NW_023503280.1	1040000	4	-1.58038
NW_023503280.1	1060000	2	-1.11882			NW_023503280.1	1045000	5	-0.520311			NW_023503280.1	1045000	5	-0.968953
NW_023503280.1	1065000	6	-1.58468			NW_023503280.1	1050000	4	-1.33037			NW_023503280.1	1050000	5	0.0875907
NW_023503280.1	1070000	1	-1.11966			NW_023503280.1	1055000	4	-0.621526			NW_023503280.1	1055000	5	-1.10043
NW_023503280.1	1075000	1	-0.845192			NW_023503280.1	1060000	4	0.445132			NW_023503280.1	1060000	5	-0.153989
NW_023503280.1	1080000	1	-0.845192			NW_023503280.1	1065000	10	-0.670995			NW_023503280.1	1065000	11	-1.11636
NW_023503280.1	1085000	0	nan			NW_023503280.1	1070000	2	-1.31528			NW_023503280.1	1070000	3	-1.54624
NW_023503280.1	1090000	1	-0.845192			NW_023503280.1	1075000	9	-0.859664			NW_023503280.1	1075000	9	-1.05113
NW_023503280.1	1095000	1	-1.11966			NW_023503280.1	1080000	9	-1.46946			NW_023503280.1	1080000	9	-1.65119
NW_023503280.1	1100000	8	-1.90476			NW_023503280.1	1085000	10	-1.57789			NW_023503280.1	1085000	10	-1.81561
NW_023503280.1	1105000	1	-1.11966			NW_023503280.1	1090000	12	-1.55269			NW_023503280.1	1090000	12	-1.40867
NW_023503280.1	1110000	0	nan			NW_023503280.1	1095000	10	-1.53338			NW_023503280.1	1095000	10	-1.74206
NW_023503280.1	1115000	2	-1.30048			NW_023503280.1	1100000	10	-1.83325			NW_023503280.1	1100000	14	-2.03908
NW_023503280.1	1120000	1	-0.845192			NW_023503280.1	1105000	11	-1.37556			NW_023503280.1	1105000	12	-1.77519
NW_023503280.1	1125000	0	nan			NW_023503280.1	1110000	5	-0.830403			NW_023503280.1	1110000	5	-1.1848
NW_023503280.1	1130000	0	nan			NW_023503280.1	1115000	6	-0.711289			NW_023503280.1	1115000	7	-1.00604
NW_023503280.1	1135000	3	-1.43248			NW_023503280.1	1120000	22	-1.5958			NW_023503280.1	1120000	22	-1.65136
NW_023503280.1	1140000	3	-1.71231			NW_023503280.1	1125000	7	-1.44188			NW_023503280.1	1125000	7	-1.63927
NW_023503280.1	1145000	0	nan			NW_023503280.1	1130000	1	-0.18789			NW_023503280.1	1130000	1	-0.478312
NW_023503280.1	1150000	3	-1.43248			NW_023503280.1	1135000	13	-1.15059			NW_023503280.1	1135000	13	-1.30254
NW_023503280.1	1155000	1	-0.845192			NW_023503280.1	1140000	6	-1.53432			NW_023503280.1	1140000	7	-1.73867
NW_023503280.1	1160000	3	-1.42531			NW_023503280.1	1145000	4	-1.52448			NW_023503280.1	1145000	4	-1.58038
NW_023503280.1	1165000	3	-0.679085			NW_023503280.1	1150000	8	-1.31084			NW_023503280.1	1150000	10	-1.52552
NW_023503280.1	1170000	1	1.68836			NW_023503280.1	1155000	6	0.605784			NW_023503280.1	1155000	6	0.0973397
NW_023503280.1	1175000	1	-0.845192			NW_023503280.1	1160000	9	-1.66792			NW_023503280.1	1160000	11	-1.54214
NW_023503280.1	1180000	2	-1.11882			NW_023503280.1	1165000	6	-1.32074			NW_023503280.1	1165000	7	-1.39307
NW_023503280.1	1185000	3	-1.43248			NW_023503280.1	1170000	7	-1.89013			NW_023503280.1	1170000	7	-1.39509
NW_023503280.1	1190000	2	-1.30048			NW_023503280.1	1175000	8	-0.272448			NW_023503280.1	1175000	8	-0.63807
NW_023503280.1	1195000	0	nan			NW_023503280.1	1180000	11	-1.13157			NW_023503280.1	1180000	11	-1.25979
NW_023503280.1	1200000	3	-1.71231			NW_023503280.1	1185000	7	-1.58617			NW_023503280.1	1185000	8	-1.73621
NW_023503280.1	1205000	0	nan			NW_023503280.1	1190000	7	-1.19371			NW_023503280.1	1190000	8	-1.32624
NW_023503280.1	1210000	2	-1.30048			NW_023503280.1	1195000	13	-2.04122			NW_023503280.1	1195000	13	-2.15451
NW_023503280.1	1215000	1	-0.845192			NW_023503280.1	1200000	8	-1.39426			NW_023503280.1	1200000	8	-1.56539
NW_023503280.1	1220000	2	-1.30048			NW_023503280.1	1205000	5	-1.03467			NW_023503280.1	1205000	5	-1.32784
NW_023503280.1	1225000	1	-0.845192			NW_023503280.1	1210000	19	-1.69504			NW_023503280.1	1210000	19	-1.95486
NW_023503280.1	1230000	8	-1.69484			NW_023503280.1	1215000	25	-2.0228			NW_023503280.1	1215000	25	-2.14429
NW_023503280.1	1235000	5	-1.55314			NW_023503280.1	1220000	4	-0.0348952			NW_023503280.1	1220000	5	-0.519269
NW_023503280.1	1240000	0	nan			NW_023503280.1	1225000	8	-0.632192			NW_023503280.1	1225000	8	-0.866849
NW_023503280.1	1245000	0	nan			NW_023503280.1	1230000	10	0.149077			NW_023503280.1	1230000	14	-0.548586
NW_023503280.1	1250000	1	-1.11966			NW_023503280.1	1235000	7	-1.15451			NW_023503280.1	1235000	10	-1.15286
NW_023503280.1	1255000	1	-1.11966			NW_023503280.1	1240000	6	-1.32506			NW_023503280.1	1240000	6	-1.54416
NW_023503280.1	1260000	0	nan			NW_023503280.1	1245000	3	-1.67583			NW_023503280.1	1245000	3	-1.60577
NW_023503280.1	1265000	2	-1.30048			NW_023503280.1	1250000	5	-1.64624			NW_023503280.1	1250000	6	-1.83268
NW_023503280.1	1270000	2	-0.531908			NW_023503280.1	1255000	3	-1.5765			NW_023503280.1	1255000	4	-1.72544
NW_023503280.1	1275000	2	-1.30048			NW_023503280.1	1260000	5	-1.31031			NW_023503280.1	1260000	5	-1.49573
NW_023503280.1	1280000	27	0.493844			NW_023503280.1	1265000	4	-1.68264			NW_023503280.1	1265000	6	-1.89973
NW_023503280.1	1285000	18	1.81122			NW_023503280.1	1270000	3	-1.29943			NW_023503280.1	1270000	4	-1.28677
NW_023503280.1	1290000	1	-1.11966			NW_023503280.1	1275000	6	-1.78026			NW_023503280.1	1275000	8	-1.99458
NW_023503280.1	1295000	0	nan			NW_023503280.1	1280000	46	-0.0931612			NW_023503280.1	1280000	47	0.0289066
NW_023503280.1	1300000	3	-0.280865			NW_023503280.1	1285000	32	0.410594			NW_023503280.1	1285000	34	0.306246
NW_023503280.1	1305000	4	-0.354977			NW_023503280.1	1290000	6	-1.43724			NW_023503280.1	1290000	7	-1.74406
NW_023503280.1	1310000	1	-0.845192			NW_023503280.1	1295000	5	-0.898138			NW_023503280.1	1295000	5	-1.2806
NW_023503280.1	1315000	0	nan			NW_023503280.1	1300000	8	-1.4125			NW_023503280.1	1300000	10	-1.44066
NW_023503280.1	1320000	0	nan			NW_023503280.1	1305000	9	-0.398155			NW_023503280.1	1305000	10	-0.567049
NW_023503280.1	1325000	4	-0.608565			NW_023503280.1	1310000	5	-0.717195			NW_023503280.1	1310000	5	-0.953535
NW_023503280.1	1330000	9	-2.17893			NW_023503280.1	1315000	8	-0.677431			NW_023503280.1	1315000	8	-1.14709
NW_023503280.1	1335000	4	-0.360874			NW_023503280.1	1320000	10	-1.8369			NW_023503280.1	1320000	10	-1.96091
NW_023503280.1	1340000	4	-0.584975			NW_023503280.1	1325000	11	-0.365809			NW_023503280.1	1325000	13	-0.913607
NW_023503280.1	1345000	7	-0.376491			NW_023503280.1	1330000	5	-1.03344			NW_023503280.1	1330000	14	-2.13676
NW_023503280.1	1350000	0	nan			NW_023503280.1	1335000	6	-0.763065			NW_023503280.1	1335000	8	-1.05811
NW_023503280.1	1355000	1	-1.03238			NW_023503280.1	1340000	10	-0.988371			NW_023503280.1	1340000	12	-1.11073
NW_023503280.1	1360000	2	0.334482			NW_023503280.1	1345000	12	-1.23533			NW_023503280.1	1345000	14	-0.760895
NW_023503280.1	1365000	1	1.63206			NW_023503280.1	1350000	7	-1.44765			NW_023503280.1	1350000	7	-1.63762
NW_023503280.1	1370000	0	nan			NW_023503280.1	1355000	11	-1.3356			NW_023503280.1	1355000	11	-1.62113
NW_023503280.1	1375000	1	-1.11966			NW_023503280.1	1360000	7	-1.99402			NW_023503280.1	1360000	8	-1.68405
NW_023503280.1	1380000	3	-0.151712			NW_023503280.1	1365000	6	-1.30025			NW_023503280.1	1365000	6	-0.990841
NW_023503280.1	1385000	3	0.257271			NW_023503280.1	1370000	6	-1.03597			NW_023503280.1	1370000	6	-1.34829
NW_023503280.1	1390000	0	nan			NW_023503280.1	1375000	2	-0.27951			NW_023503280.1	1375000	3	-1.01705
NW_023503280.1	1395000	0	nan			NW_023503280.1	1380000	9	-1.19509			NW_023503280.1	1380000	10	-1.03741
NW_023503280.1	1400000	3	-0.700611			NW_023503280.1	1385000	5	-1.12204			NW_023503280.1	1385000	6	-0.110202
NW_023503280.1	1405000	1	-0.845192			NW_023503280.1	1390000	6	-1.17728			NW_023503280.1	1390000	6	-1.4451
NW_023503280.1	1410000	2	-1.30048			NW_023503280.1	1395000	9	-1.52338			NW_023503280.1	1395000	9	-1.73154
NW_023503280.1	1415000	2	-1.11882			NW_023503280.1	1400000	10	-1.15034			NW_023503280.1	1400000	11	-1.43996
NW_023503280.1	1420000	2	-0.946471			NW_023503280.1	1405000	9	-1.09676			NW_023503280.1	1405000	9	-1.41518
NW_023503280.1	1425000	2	0.558067			NW_023503280.1	1410000	6	-0.832101			NW_023503280.1	1410000	7	-1.34019
NW_023503280.1	1430000	1	-0.845192			NW_023503280.1	1415000	8	-1.75052			NW_023503280.1	1415000	9	-1.88748
NW_023503280.1	1435000	4	-1.53151			NW_023503280.1	1420000	7	-1.05808			NW_023503280.1	1420000	7	-1.2361
NW_023503280.1	1440000	0	nan			NW_023503280.1	1425000	6	-0.462113			NW_023503280.1	1425000	6	-0.0209326
NW_023503280.1	1445000	1	-0.845192			NW_023503280.1	1430000	6	-0.654388			NW_023503280.1	1430000	7	-1.24384
NW_023503280.1	1450000	10	-1.24008			NW_023503280.1	1435000	5	-0.300047			NW_023503280.1	1435000	7	-1.08553
NW_023503280.1	1455000	2	-1.48214			NW_023503280.1	1440000	5	-1.16757			NW_023503280.1	1440000	5	-1.41007
NW_023503280.1	1460000	27	-2.42111			NW_023503280.1	1445000	2	-0.0273234			NW_023503280.1	1445000	3	-0.839655
NW_023503280.1	1465000	8	-0.593114			NW_023503280.1	1450000	18	-0.500233			NW_023503280.1	1450000	19	-0.815397
NW_023503280.1	1470000	27	-1.68227			NW_023503280.1	1455000	6	-1.61091			NW_023503280.1	1455000	8	-1.93721
NW_023503280.1	1475000	2	-1.11882			NW_023503280.1	1460000	61	0.446153			NW_023503280.1	1460000	75	-0.884416
NW_023503280.1	1480000	13	-2.13131			NW_023503280.1	1465000	16	-2.03989			NW_023503280.1	1465000	19	-1.86015
NW_023503280.1	1485000	0	nan			NW_023503280.1	1470000	44	-1.94162			NW_023503280.1	1470000	59	-2.13809
NW_023503280.1	1490000	3	-1.29256			NW_023503280.1	1475000	11	-1.37894			NW_023503280.1	1475000	12	-1.33518
NW_023503280.1	1495000	0	nan			NW_023503280.1	1480000	12	-1.74921			NW_023503280.1	1480000	21	-2.17778
NW_023503280.1	1500000	2	-1.30048			NW_023503280.1	1485000	7	-1.6333			NW_023503280.1	1485000	7	-1.77337
NW_023503280.1	1505000	0	nan			NW_023503280.1	1490000	4	0.272798			NW_023503280.1	1490000	6	-0.573498
NW_023503280.1	1510000	1	-1.11966			NW_023503280.1	1495000	4	-1.20465			NW_023503280.1	1495000	4	-1.38229
NW_023503280.1	1515000	1	-0.845192			NW_023503280.1	1500000	18	-1.50995			NW_023503280.1	1500000	19	-1.87585
NW_023503280.1	1520000	8	-2.10762			NW_023503280.1	1505000	3	-1.11472			NW_023503280.1	1505000	3	-1.2606
NW_023503280.1	1525000	4	-1.53151			NW_023503280.1	1510000	5	-1.90219			NW_023503280.1	1510000	6	-1.97431
NW_023503280.1	1530000	4	-1.41651			NW_023503280.1	1515000	9	-1.07535			NW_023503280.1	1515000	10	-1.53555
NW_023503280.1	1535000	2	-1.11882			NW_023503280.1	1520000	12	1.07122			NW_023503280.1	1520000	14	0.0594824
NW_023503280.1	1540000	3	-1.43248			NW_023503280.1	1525000	17	-0.108945			NW_023503280.1	1525000	17	-0.661511
NW_023503280.1	1545000	2	-1.30048			NW_023503280.1	1530000	5	-0.468629			NW_023503280.1	1530000	5	-0.654602
NW_023503280.1	1550000	3	-1.57239			NW_023503280.1	1535000	9	-0.252249			NW_023503280.1	1535000	10	-1.0063
NW_023503280.1	1555000	0	nan			NW_023503280.1	1540000	7	-0.718523			NW_023503280.1	1540000	8	-1.22313
NW_023503280.1	1560000	2	-1.30048			NW_023503280.1	1545000	9	-1.16496			NW_023503280.1	1545000	10	-1.51138
NW_023503280.1	1565000	1	-0.845192			NW_023503280.1	1550000	4	-1.22541			NW_023503280.1	1550000	7	-1.80739
NW_023503280.1	1570000	1	-0.845192			NW_023503280.1	1555000	8	-0.945881			NW_023503280.1	1555000	8	-1.36315
NW_023503280.1	1575000	0	nan			NW_023503280.1	1560000	4	-1.29874			NW_023503280.1	1560000	6	-1.72081
NW_023503280.1	1580000	2	-1.30048			NW_023503280.1	1565000	7	-0.899363			NW_023503280.1	1565000	7	-1.24486
NW_023503280.1	1585000	1	-0.845192			NW_023503280.1	1570000	9	-1.39968			NW_023503280.1	1570000	9	-1.03969
NW_023503280.1	1590000	1	-0.845192			NW_023503280.1	1575000	2	0.542348			NW_023503280.1	1575000	2	-0.109869
NW_023503280.1	1595000	0	nan			NW_023503280.1	1580000	10	-1.51806			NW_023503280.1	1580000	11	-1.418
NW_023503280.1	1600000	3	-1.43248			NW_023503280.1	1585000	5	-0.539999			NW_023503280.1	1585000	5	-0.595501
NW_023503280.1	1605000	2	-1.11882			NW_023503280.1	1590000	8	-1.62627			NW_023503280.1	1590000	8	-1.2329
NW_023503280.1	1610000	0	nan			NW_023503280.1	1595000	1	-0.8912			NW_023503280.1	1595000	1	-0.911574
NW_023503280.1	1615000	1	-0.845192			NW_023503280.1	1600000	5	-0.690123			NW_023503280.1	1600000	7	-1.10406
NW_023503280.1	1620000	0	nan			NW_023503280.1	1605000	5	-0.318505			NW_023503280.1	1605000	6	-0.942251
NW_023503280.1	1625000	1	-1.11966			NW_023503280.1	1610000	8	-0.915468			NW_023503280.1	1610000	8	-1.31404
NW_023503280.1	1630000	1	-1.11966			NW_023503280.1	1615000	11	-1.46139			NW_023503280.1	1615000	11	-1.17674
NW_023503280.1	1635000	1	-0.845192			NW_023503280.1	1620000	6	-0.78356			NW_023503280.1	1620000	6	-1.16524
NW_023503280.1	1640000	0	nan			NW_023503280.1	1625000	7	-0.389408			NW_023503280.1	1625000	7	-0.962175
NW_023503280.1	1645000	0	nan			NW_023503280.1	1630000	6	-1.2776			NW_023503280.1	1630000	7	-1.63762
NW_023503280.1	1650000	2	-1.11882			NW_023503280.1	1635000	7	-1.0879			NW_023503280.1	1635000	8	-1.53336
NW_023503280.1	1655000	27	1.15405			NW_023503280.1	1640000	3	-0.194648			NW_023503280.1	1640000	3	-0.640007
NW_023503280.1	1660000	28	1.12493			NW_023503280.1	1645000	1	-0.353574			NW_023503280.1	1645000	1	-0.58317
NW_023503280.1	1665000	2	-1.30048			NW_023503280.1	1650000	7	-0.632912			NW_023503280.1	1650000	7	-0.753407
NW_023503280.1	1670000	3	-1.57239			NW_023503280.1	1655000	31	0.358109			NW_023503280.1	1655000	32	0.806924
NW_023503280.1	1675000	0	nan			NW_023503280.1	1660000	30	1.16199			NW_023503280.1	1660000	30	1.50263
NW_023503280.1	1680000	3	-1.43248			NW_023503280.1	1665000	6	-1.13305			NW_023503280.1	1665000	7	-1.49008
NW_023503280.1	1685000	1	-0.845192			NW_023503280.1	1670000	11	-1.47491			NW_023503280.1	1670000	12	-1.77474
NW_023503280.1	1690000	1	-0.845192			NW_023503280.1	1675000	4	-1.22541			NW_023503280.1	1675000	4	-1.39295
NW_023503280.1	1695000	1	-1.11966			NW_023503280.1	1680000	10	-1.90183			NW_023503280.1	1680000	12	-2.08092
NW_023503280.1	1700000	2	-1.48214			NW_023503280.1	1685000	3	-0.774922			NW_023503280.1	1685000	3	-0.925647
NW_023503280.1	1705000	0	nan			NW_023503280.1	1690000	6	-1.20856			NW_023503280.1	1690000	7	-1.58271
NW_023503280.1	1710000	1	-1.11966			NW_023503280.1	1695000	5	-0.979296			NW_023503280.1	1695000	6	-1.43869
NW_023503280.1	1715000	5	-1.51051			NW_023503280.1	1700000	7	-1.63138			NW_023503280.1	1700000	7	-1.706
NW_023503280.1	1720000	1	-0.845192			NW_023503280.1	1705000	10	-1.5487			NW_023503280.1	1705000	10	-1.76212
NW_023503280.1	1725000	1	-0.845192			NW_023503280.1	1710000	8	-1.628			NW_023503280.1	1710000	9	-1.88971
NW_023503280.1	1730000	1	-0.845192			NW_023503280.1	1715000	10	0.511688			NW_023503280.1	1715000	10	0.226321
NW_023503280.1	1735000	0	nan			NW_023503280.1	1720000	2	-0.639776			NW_023503280.1	1720000	2	0.549232
NW_023503280.1	1740000	0	nan			NW_023503280.1	1725000	12	-1.94625			NW_023503280.1	1725000	12	-1.54383
NW_023503280.1	1745000	2	-1.11882			NW_023503280.1	1730000	11	-1.02546			NW_023503280.1	1730000	11	-1.00707
NW_023503280.1	1750000	0	nan			NW_023503280.1	1735000	4	-1.4454			NW_023503280.1	1735000	4	-1.53203
NW_023503280.1	1755000	1	-1.11966			NW_023503280.1	1740000	4	-1.68264			NW_023503280.1	1740000	4	-1.67708
NW_023503280.1	1760000	2	-1.30048			NW_023503280.1	1745000	2	0.677447			NW_023503280.1	1745000	2	2.35655
NW_023503280.1	1765000	3	-1.43248			NW_023503280.1	1750000	8	-1.66711			NW_023503280.1	1750000	8	-1.82132
NW_023503280.1	1770000	3	-1.29974			NW_023503280.1	1755000	6	-1.32506			NW_023503280.1	1755000	7	-1.68074
NW_023503280.1	1775000	1	-0.845192			NW_023503280.1	1760000	15	-1.75894			NW_023503280.1	1760000	16	-1.87385
NW_023503280.1	1780000	1	-0.845192			NW_023503280.1	1765000	12	-1.53569			NW_023503280.1	1765000	12	-1.3481
NW_023503280.1	1785000	1	-1.11966			NW_023503280.1	1770000	8	-1.38644			NW_023503280.1	1770000	9	-0.704922
NW_023503280.1	1790000	16	-0.934569			NW_023503280.1	1775000	8	-1.28738			NW_023503280.1	1775000	8	-1.5056
NW_023503280.1	1795000	3	-1.43248			NW_023503280.1	1780000	5	-1.62901			NW_023503280.1	1780000	5	-0.77152
NW_023503280.1	1800000	7	-1.72119			NW_023503280.1	1785000	11	-1.73242			NW_023503280.1	1785000	12	-1.98628
NW_023503280.1	1805000	1	-0.845192			NW_023503280.1	1790000	23	-1.84992			NW_023503280.1	1790000	28	-1.67678
NW_023503280.1	1810000	1	1.35055			NW_023503280.1	1795000	12	-1.54275			NW_023503280.1	1795000	15	-1.97824
NW_023503280.1	1815000	2	-1.30048			NW_023503280.1	1800000	21	-0.868519			NW_023503280.1	1800000	22	-0.122783
NW_023503280.1	1820000	3	-1.57239			NW_023503280.1	1805000	3	-1.05373			NW_023503280.1	1805000	4	-1.40093
NW_023503280.1	1825000	2	-0.485328			NW_023503280.1	1810000	5	-1.22804			NW_023503280.1	1810000	6	-1.36869
NW_023503280.1	1830000	10	-2.17614			NW_023503280.1	1815000	11	-0.928808			NW_023503280.1	1815000	12	-1.44853
NW_023503280.1	1835000	1	-0.845192			NW_023503280.1	1820000	5	0.129406			NW_023503280.1	1820000	6	0.0182404
NW_023503280.1	1840000	0	nan			NW_023503280.1	1825000	10	-1.1864			NW_023503280.1	1825000	10	-1.17444
NW_023503280.1	1845000	1	-0.845192			NW_023503280.1	1830000	27	-1.81874			NW_023503280.1	1830000	28	-1.85437
NW_023503280.1	1850000	3	-1.03425			NW_023503280.1	1835000	9	-1.64232			NW_023503280.1	1835000	9	-1.75888
NW_023503280.1	1855000	2	-1.48214			NW_023503280.1	1840000	1	0.894126			NW_023503280.1	1840000	1	0.277592
NW_023503280.1	1860000	0	nan			NW_023503280.1	1845000	4	-0.446112			NW_023503280.1	1845000	5	-1.08758
NW_023503280.1	1865000	1	-0.845192			NW_023503280.1	1850000	10	0.423406			NW_023503280.1	1850000	10	0.403512
NW_023503280.1	1870000	0	nan			NW_023503280.1	1855000	5	-1.56133			NW_023503280.1	1855000	6	-1.75358
NW_023503280.1	1875000	6	-1.84198			NW_023503280.1	1860000	5	-1.42967			NW_023503280.1	1860000	5	-1.55525
NW_023503280.1	1880000	7	-1.60771			NW_023503280.1	1865000	5	-0.0871665			NW_023503280.1	1865000	5	-0.598927
NW_023503280.1	1885000	3	-0.915865			NW_023503280.1	1870000	3	-0.926526			NW_023503280.1	1870000	3	-1.14514
NW_023503280.1	1890000	0	nan			NW_023503280.1	1875000	13	-0.550855			NW_023503280.1	1875000	13	-0.218628
NW_023503280.1	1895000	1	-0.845192			NW_023503280.1	1880000	11	-0.854463			NW_023503280.1	1880000	13	-0.853065
NW_023503280.1	1900000	1	-1.11966			NW_023503280.1	1885000	7	-1.08501			NW_023503280.1	1885000	9	-1.48353
NW_023503280.1	1905000	4	-1.64651			NW_023503280.1	1890000	6	-1.66592			NW_023503280.1	1890000	6	-1.7581
NW_023503280.1	1910000	6	-2.07642			NW_023503280.1	1895000	6	-1.09099			NW_023503280.1	1895000	6	-0.690264
NW_023503280.1	1915000	4	-0.405105			NW_023503280.1	1900000	5	-0.676587			NW_023503280.1	1900000	6	-1.28276
NW_023503280.1	1920000	1	-0.845192			NW_023503280.1	1905000	6	-0.87417			NW_023503280.1	1905000	9	-1.37948
NW_023503280.1	1925000	3	-1.34552			NW_023503280.1	1910000	14	-1.49714			NW_023503280.1	1910000	15	-1.77865
NW_023503280.1	1930000	8	-0.137187			NW_023503280.1	1915000	10	-0.67902			NW_023503280.1	1915000	12	-1.13322
NW_023503280.1	1935000	1	-0.845192			NW_023503280.1	1920000	7	-0.962849			NW_023503280.1	1920000	7	-1.26709
NW_023503280.1	1940000	0	nan			NW_023503280.1	1925000	5	-1.06613			NW_023503280.1	1925000	6	-1.35182
NW_023503280.1	1945000	1	-0.106241			NW_023503280.1	1930000	11	0.552023			NW_023503280.1	1930000	12	0.129563
NW_023503280.1	1950000	1	-1.11966			NW_023503280.1	1935000	6	-0.623915			NW_023503280.1	1935000	7	-1.23038
NW_023503280.1	1955000	2	-1.11882			NW_023503280.1	1940000	4	-1.67976			NW_023503280.1	1940000	4	-1.67609
NW_023503280.1	1960000	3	-1.29256			NW_023503280.1	1945000	6	-1.32722			NW_023503280.1	1945000	6	-1.39236
NW_023503280.1	1965000	1	-0.845192			NW_023503280.1	1950000	2	-0.718584			NW_023503280.1	1950000	3	-1.2606
NW_023503280.1	1970000	4	-1.42241			NW_023503280.1	1955000	7	0.378707			NW_023503280.1	1955000	7	0.137517
NW_023503280.1	1975000	1	0.111926			NW_023503280.1	1960000	8	0.656455			NW_023503280.1	1960000	8	0.387776
NW_023503280.1	1980000	2	-1.11882			NW_023503280.1	1965000	3	-0.591953			NW_023503280.1	1965000	3	0.177827
NW_023503280.1	1985000	1	-0.845192			NW_023503280.1	1970000	7	0.112571			NW_023503280.1	1970000	9	-0.428462
NW_023503280.1	1990000	1	-0.845192			NW_023503280.1	1975000	3	-0.933496			NW_023503280.1	1975000	3	-0.851682
NW_023503280.1	1995000	2	-1.30048			NW_023503280.1	1980000	9	-1.28073			NW_023503280.1	1980000	9	-1.27905
NW_023503280.1	2000000	0	nan			NW_023503280.1	1985000	6	-1.60444			NW_023503280.1	1985000	6	-0.846956
NW_023503280.1	2005000	1	-1.11966			NW_023503280.1	1990000	5	-0.789796			NW_023503280.1	1990000	6	-1.31176
NW_023503280.1	2010000	0	nan			NW_023503280.1	1995000	10	-1.53651			NW_023503280.1	1995000	12	-1.91011
NW_023503280.1	2015000	1	-1.11966			NW_023503280.1	2000000	3	-1.47718			NW_023503280.1	2000000	3	-1.48671
NW_023503280.1	2020000	0	nan			NW_023503280.1	2005000	2	-1.0721			NW_023503280.1	2005000	3	-1.43078
NW_023503280.1	2025000	0	nan			NW_023503280.1	2010000	6	-1.19778			NW_023503280.1	2010000	6	-1.43643
NW_023503280.1	2030000	1	-0.845192			NW_023503280.1	2015000	5	-1.17987			NW_023503280.1	2015000	6	-1.57919
NW_023503280.1	2035000	2	-1.29118			NW_023503280.1	2020000	3	-1.11472			NW_023503280.1	2020000	3	-1.2606
NW_023503280.1	2040000	1	-1.11966			NW_023503280.1	2025000	4	-0.929219			NW_023503280.1	2025000	4	-1.20652
NW_023503280.1	2045000	2	-1.11882			NW_023503280.1	2030000	4	-0.828572			NW_023503280.1	2030000	4	-1.04202
NW_023503280.1	2050000	1	-0.845192			NW_023503280.1	2035000	8	-0.543559			NW_023503280.1	2035000	9	-1.17499
NW_023503280.1	2055000	9	-1.86234			NW_023503280.1	2040000	7	-1.51787			NW_023503280.1	2040000	8	-1.81522
NW_023503280.1	2060000	3	-1.43248			NW_023503280.1	2045000	5	-0.509236			NW_023503280.1	2045000	5	-0.81349
NW_023503280.1	2065000	2	-1.11882			NW_023503280.1	2050000	5	-1.03344			NW_023503280.1	2050000	5	-1.23405
NW_023503280.1	2070000	2	-1.11882			NW_023503280.1	2055000	9	-1.19985			NW_023503280.1	2055000	12	-0.343396
NW_023503280.1	2075000	1	-0.845192			NW_023503280.1	2060000	6	-1.00038			NW_023503280.1	2060000	8	-1.45008
NW_023503280.1	2080000	0	nan			NW_023503280.1	2065000	5	0.558859			NW_023503280.1	2065000	5	0.20408
NW_023503280.1	2085000	2	-1.30048			NW_023503280.1	2070000	7	-1.21102			NW_023503280.1	2070000	7	-0.711301
NW_023503280.1	2090000	0	nan			NW_023503280.1	2075000	5	-0.151154			NW_023503280.1	2075000	5	0.0554704
NW_023503279.1	0	3	-1.29256			NW_023503280.1	2080000	3	-1.09381			NW_023503280.1	2080000	3	-1.25338
NW_023503279.1	5000	13	1.2205			NW_023503280.1	2085000	8	-0.927633			NW_023503280.1	2085000	8	-1.01723
NW_023503279.1	10000	2	-1.42926			NW_023503280.1	2090000	1	-0.18789			NW_023503280.1	2090000	1	-0.478312
NW_023503279.1	15000	5	-1.80482			NW_023503279.1	0	15	-1.13284			NW_023503279.1	0	17	-1.53409
NW_023503279.1	20000	18	-2.04902			NW_023503279.1	5000	17	-1.06649			NW_023503279.1	5000	18	-0.145928
NW_023503279.1	25000	0	nan			NW_023503279.1	10000	4	-1.08827			NW_023503279.1	10000	6	-1.66059
NW_023503279.1	30000	1	-1.11966			NW_023503279.1	15000	6	-0.270107			NW_023503279.1	15000	9	-1.06117
NW_023503279.1	35000	2	-1.30048			NW_023503279.1	20000	28	0.242644			NW_023503279.1	20000	36	-0.920143
NW_023503279.1	40000	0	nan			NW_023503279.1	25000	21	-1.3289			NW_023503279.1	25000	21	-1.78237
NW_023503279.1	45000	0	nan			NW_023503279.1	30000	6	-0.872013			NW_023503279.1	30000	7	-1.39779
NW_023503279.1	50000	2	-1.11882			NW_023503279.1	35000	7	-0.780085			NW_023503279.1	35000	8	-1.09258
NW_023503279.1	55000	1	-0.845192			NW_023503279.1	40000	6	-1.15247			NW_023503279.1	40000	6	-1.42061
NW_023503279.1	60000	0	nan			NW_023503279.1	45000	8	-1.83742			NW_023503279.1	45000	8	-1.93235
NW_023503279.1	65000	0	nan			NW_023503279.1	50000	8	-1.26478			NW_023503279.1	50000	9	-1.13844
NW_023503279.1	70000	1	-0.845192			NW_023503279.1	55000	7	-0.736799			NW_023503279.1	55000	7	-0.395006
NW_023503279.1	75000	2	-1.11882			NW_023503279.1	60000	9	-0.883453			NW_023503279.1	60000	9	-1.30722
NW_023503279.1	80000	3	-1.57239			NW_023503279.1	65000	8	-1.29954			NW_023503279.1	65000	8	-1.57698
NW_023503279.1	85000	4	-1.53151			NW_023503279.1	70000	8	-1.23872			NW_023503279.1	70000	8	-0.945549
NW_023503279.1	90000	0	nan			NW_023503279.1	75000	7	0.0663994			NW_023503279.1	75000	7	-0.210079
NW_023503279.1	95000	1	-0.845192			NW_023503279.1	80000	5	-0.402719			NW_023503279.1	80000	7	-1.01575
NW_023503279.1	100000	2	-1.48214			NW_023503279.1	85000	7	-0.276042			NW_023503279.1	85000	8	-0.0664268
NW_023503279.1	105000	4	-1.41651			NW_023503279.1	90000	1	0.664197			NW_023503279.1	90000	1	0.102444
NW_023503279.1	110000	14	-1.19846			NW_023503279.1	95000	5	-0.79964			NW_023503279.1	95000	6	-1.31477
NW_023503279.1	115000	5	-0.690455			NW_023503279.1	100000	1	-0.8912			NW_023503279.1	100000	3	-1.54624
NW_023503279.1	120000	1	-0.5848			NW_023503279.1	105000	7	-0.227341			NW_023503279.1	105000	8	-0.392204
NW_023503279.1	125000	3	0.397187			NW_023503279.1	110000	22	-1.29801			NW_023503279.1	110000	24	-1.1482
NW_023503279.1	130000	2	-1.11882			NW_023503279.1	115000	15	-1.18303			NW_023503279.1	115000	15	-1.15613
NW_023503279.1	135000	41	1.50534			NW_023503279.1	120000	8	-0.883317			NW_023503279.1	120000	8	-1.23595
NW_023503279.1	140000	33	1.08676			NW_023503279.1	125000	11	-1.3688			NW_023503279.1	125000	11	-1.27744
NW_023503279.1	145000	12	-0.925482			NW_023503279.1	130000	7	-1.32453			NW_023503279.1	130000	7	-0.764523
NW_023503279.1	150000	0	nan			NW_023503279.1	135000	45	1.38466			NW_023503279.1	135000	51	1.44899
NW_023503279.1	155000	0	nan			NW_023503279.1	140000	36	0.779839			NW_023503279.1	140000	38	1.33894
NW_023503279.1	160000	1	-0.845192			NW_023503279.1	145000	18	-0.0377074			NW_023503279.1	145000	20	-0.436951
NW_023503279.1	165000	0	nan			NW_023503279.1	150000	7	-1.37455			NW_023503279.1	150000	7	-1.61202
NW_023503279.1	170000	4	-1.8765			NW_023503279.1	155000	4	-0.365594			NW_023503279.1	155000	4	-0.843622
NW_023503279.1	175000	1	-0.845192			NW_023503279.1	160000	9	-0.309343			NW_023503279.1	160000	9	-0.903271
NW_023503279.1	180000	1	-1.11966			NW_023503279.1	165000	3	-0.571042			NW_023503279.1	165000	3	-0.921438
NW_023503279.1	185000	2	-1.30048			NW_023503279.1	170000	7	-1.5804			NW_023503279.1	170000	11	-2.08285
NW_023503279.1	190000	3	-0.944565			NW_023503279.1	175000	9	-1.58602			NW_023503279.1	175000	9	-1.14151
NW_023503279.1	195000	0	nan			NW_023503279.1	180000	6	-0.983117			NW_023503279.1	180000	7	-1.47492
NW_023503279.1	200000	2	-1.48214			NW_023503279.1	185000	4	-1.36919			NW_023503279.1	185000	5	-0.731691
NW_023503279.1	205000	1	-1.11966			NW_023503279.1	190000	6	-0.430831			NW_023503279.1	190000	7	-0.797196
NW_023503279.1	210000	1	-0.845192			NW_023503279.1	195000	5	-1.55887			NW_023503279.1	195000	5	-1.65419
NW_023503279.1	215000	2	-1.30048			NW_023503279.1	200000	9	-1.93572			NW_023503279.1	200000	11	-2.15038
NW_023503279.1	220000	4	-1.64062			NW_023503279.1	205000	3	-1.11472			NW_023503279.1	205000	4	-1.48866
NW_023503279.1	225000	1	-1.11966			NW_023503279.1	210000	4	-0.263509			NW_023503279.1	210000	4	-0.302769
NW_023503279.1	230000	2	-1.11882			NW_023503279.1	215000	2	-0.943751			NW_023503279.1	215000	3	-1.25333
NW_023503279.1	235000	0	nan			NW_023503279.1	220000	10	-0.636606			NW_023503279.1	220000	13	-1.2923
NW_023503279.1	240000	2	-1.11882			NW_023503279.1	225000	7	-1.58617			NW_023503279.1	225000	8	-1.84968
NW_023503279.1	245000	0	nan			NW_023503279.1	230000	6	-0.43946			NW_023503279.1	230000	7	-0.802923
NW_023503279.1	250000	2	-1.11882			NW_023503279.1	235000	3	-1.0154			NW_023503279.1	235000	3	-1.20106
NW_023503279.1	255000	2	-1.30048			NW_023503279.1	240000	8	-0.621764			NW_023503279.1	240000	9	-0.721103
NW_023503279.1	260000	4	-0.82382			NW_023503279.1	245000	7	-1.21102			NW_023503279.1	245000	7	-1.49817
NW_023503279.1	265000	2	-1.30048			NW_023503279.1	250000	10	-1.25249			NW_023503279.1	250000	11	-1.56381
NW_023503279.1	270000	2	-1.11882			NW_023503279.1	255000	8	-1.33256			NW_023503279.1	255000	10	-1.79324
NW_023503279.1	275000	1	-0.845192			NW_023503279.1	260000	5	-1.46289			NW_023503279.1	260000	8	-1.10203
NW_023503279.1	280000	11	-1.80435			NW_023503279.1	265000	7	-1.42457			NW_023503279.1	265000	8	-1.69839
NW_023503279.1	285000	8	-1.75342			NW_023503279.1	270000	10	-0.919059			NW_023503279.1	270000	11	-1.23568
NW_023503279.1	290000	0	nan			NW_023503279.1	275000	3	-1.11472			NW_023503279.1	275000	4	-1.43931
NW_023503279.1	295000	2	-1.30048			NW_023503279.1	280000	31	-1.0107			NW_023503279.1	280000	42	-1.82806
NW_023503279.1	300000	1	-1.11966			NW_023503279.1	285000	7	-1.41231			NW_023503279.1	285000	15	-2.08796
NW_023503279.1	305000	6	-1.67484			NW_023503279.1	290000	3	-0.827199			NW_023503279.1	290000	3	-1.08561
NW_023503279.1	310000	0	nan			NW_023503279.1	295000	7	0.228963			NW_023503279.1	295000	8	-0.617022
NW_023503279.1	315000	4	-1.76151			NW_023503279.1	300000	6	-1.89029			NW_023503279.1	300000	7	-1.99872
NW_023503279.1	320000	3	-1.57239			NW_023503279.1	305000	11	-0.86798			NW_023503279.1	305000	12	-1.08334
NW_023503279.1	325000	2	-1.48214			NW_023503279.1	310000	3	-1.20011			NW_023503279.1	310000	3	-1.31532
NW_023503279.1	330000	31	-2.72314			NW_023503279.1	315000	5	-0.487087			NW_023503279.1	315000	8	-0.922366
NW_023503279.1	335000	14	-2.44342			NW_023503279.1	320000	7	-0.843572			NW_023503279.1	320000	9	-1.45842
NW_023503279.1	340000	1	-0.845192			NW_023503279.1	325000	3	-0.095322			NW_023503279.1	325000	5	-1.17581
NW_023503279.1	345000	0	nan			NW_023503279.1	330000	36	2.6411			NW_023503279.1	330000	37	1.23787
NW_023503279.1	350000	2	-1.11882			NW_023503279.1	335000	28	0.727573			NW_023503279.1	335000	28	-0.122216
NW_023503279.1	355000	2	-0.783441			NW_023503279.1	340000	7	-1.42457			NW_023503279.1	340000	7	-0.955849
NW_023503279.1	360000	3	-1.29256			NW_023503279.1	345000	13	-1.14335			NW_023503279.1	345000	13	-1.54721
NW_023503279.1	365000	3	-1.29256			NW_023503279.1	350000	7	-0.88782			NW_023503279.1	350000	8	-1.33325
NW_023503279.1	370000	2	-1.30048			NW_023503279.1	355000	6	0.04379			NW_023503279.1	355000	6	-0.400986
NW_023503279.1	375000	8	-2.03882			NW_023503279.1	360000	13	-1.31137			NW_023503279.1	360000	14	-1.60632
NW_023503279.1	380000	12	-0.79584			NW_023503279.1	365000	19	-1.02635			NW_023503279.1	365000	19	-0.838056
NW_023503279.1	385000	0	nan			NW_023503279.1	370000	11	-0.878118			NW_023503279.1	370000	12	-1.24717
NW_023503279.1	390000	1	-1.11966			NW_023503279.1	375000	10	1.93295			NW_023503279.1	375000	12	0.660195
NW_023503279.1	395000	1	-1.11966			NW_023503279.1	380000	22	-0.0782597			NW_023503279.1	380000	24	-0.305582
NW_023503279.1	400000	6	-1.67924			NW_023503279.1	385000	9	-1.67722			NW_023503279.1	385000	9	-1.85596
NW_023503279.1	405000	15	-0.881655			NW_023503279.1	390000	6	-1.35958			NW_023503279.1	390000	7	-1.69084
NW_023503279.1	410000	0	nan			NW_023503279.1	395000	9	-1.31166			NW_023503279.1	395000	10	-1.70192
NW_023503279.1	415000	1	1.68836			NW_023503279.1	400000	13	-2.15795			NW_023503279.1	400000	14	-2.08802
NW_023503279.1	420000	1	-1.11966			NW_023503279.1	405000	29	0.206923			NW_023503279.1	405000	31	-0.226643
NW_023503279.1	425000	0	nan			NW_023503279.1	410000	7	-0.786819			NW_023503279.1	410000	7	-1.22229
NW_023503279.1	430000	0	nan			NW_023503279.1	415000	8	-1.3986			NW_023503279.1	415000	8	-1.14932
NW_023503279.1	435000	4	-1.53151			NW_023503279.1	420000	6	-1.54727			NW_023503279.1	420000	7	-1.80672
NW_023503279.1	440000	2	-1.30048			NW_023503279.1	425000	11	-2.01155			NW_023503279.1	425000	11	-2.10504
NW_023503279.1	445000	0	nan			NW_023503279.1	430000	18	1.37678			NW_023503279.1	430000	18	0.549805
NW_023503279.1	450000	1	-0.845192			NW_023503279.1	435000	39	2.73432			NW_023503279.1	435000	40	1.5941
NW_023503279.1	455000	1	-0.845192			NW_023503279.1	440000	11	-1.24512			NW_023503279.1	440000	12	-1.27573
NW_023503279.1	460000	2	-1.48214			NW_023503279.1	445000	8	-1.13705			NW_023503279.1	445000	8	-1.45588
NW_023503279.1	465000	1	-0.845192			NW_023503279.1	450000	8	-1.48289			NW_023503279.1	450000	8	-1.04652
NW_023503279.1	470000	54	1.75259			NW_023503279.1	455000	5	-0.856244			NW_023503279.1	455000	5	-1.10043
NW_023503279.1	475000	55	2.56974			NW_023503279.1	460000	2	-1.44362			NW_023503279.1	460000	4	-1.77479
NW_023503279.1	480000	7	-1.09312			NW_023503279.1	465000	5	-0.0490202			NW_023503279.1	465000	5	-0.22676
NW_023503279.1	485000	1	-1.11966			NW_023503279.1	470000	76	0.790051			NW_023503279.1	470000	81	0.837202
NW_023503279.1	490000	1	-1.11966			NW_023503279.1	475000	63	2.42746			NW_023503279.1	475000	65	2.58927
NW_023503279.1	495000	0	nan			NW_023503279.1	480000	13	-1.05786			NW_023503279.1	480000	15	-0.926259
NW_023503279.1	500000	0	nan			NW_023503279.1	485000	6	-0.147137			NW_023503279.1	485000	7	-0.860186
NW_023503279.1	505000	14	-2.05151			NW_023503279.1	490000	7	-0.641571			NW_023503279.1	490000	8	-1.19141
NW_023503279.1	510000	0	nan			NW_023503279.1	495000	9	-1.85484			NW_023503279.1	495000	9	-1.96532
NW_023503279.1	515000	1	-0.106241			NW_023503279.1	500000	16	1.0143			NW_023503279.1	500000	16	-0.0532419
NW_023503279.1	520000	1	-0.845192			NW_023503279.1	505000	32	-0.469383			NW_023503279.1	505000	35	-1.01119
NW_023503279.1	525000	0	nan			NW_023503279.1	510000	35	0.113443			NW_023503279.1	510000	35	-0.434682
NW_023503279.1	530000	3	-1.57239			NW_023503279.1	515000	5	-1.04944			NW_023503279.1	515000	5	-1.15525
NW_023503279.1	535000	3	-1.71231			NW_023503279.1	520000	6	-1.21396			NW_023503279.1	520000	6	-0.764843
NW_023503279.1	540000	11	1.83288			NW_023503279.1	525000	0	nan			NW_023503279.1	525000	0	nan
NW_023503279.1	545000	2	-0.485328			NW_023503279.1	530000	8	-0.836394			NW_023503279.1	530000	10	-1.46046
NW_023503279.1	550000	16	1.63989			NW_023503279.1	535000	7	-1.66037			NW_023503279.1	535000	10	-2.04786
NW_023503279.1	555000	3	-1.29256			NW_023503279.1	540000	20	1.11752			NW_023503279.1	540000	20	1.11974
NW_023503279.1	560000	0	nan			NW_023503279.1	545000	4	-0.400101			NW_023503279.1	545000	6	-1.10083
NW_023503279.1	565000	2	-1.11882			NW_023503279.1	550000	22	1.74218			NW_023503279.1	550000	23	1.54901
NW_023503279.1	570000	1	-0.845192			NW_023503279.1	555000	9	-1.34417			NW_023503279.1	555000	9	-0.341701
NW_023503279.1	575000	14	0.248608			NW_023503279.1	560000	5	-1.90219			NW_023503279.1	560000	5	-1.86361
NW_023503279.1	580000	0	nan			NW_023503279.1	565000	12	-1.3493			NW_023503279.1	565000	12	-1.10205
NW_023503279.1	585000	9	-1.79967			NW_023503279.1	570000	8	-1.60715			NW_023503279.1	570000	8	-1.10417
NW_023503279.1	590000	18	-1.97888			NW_023503279.1	575000	22	0.216327			NW_023503279.1	575000	24	-0.0886086
NW_023503279.1	595000	5	-1.51051			NW_023503279.1	580000	6	-0.518204			NW_023503279.1	580000	6	-0.914378
NW_023503279.1	600000	2	-1.11882			NW_023503279.1	585000	15	1.6768			NW_023503279.1	585000	16	0.659689
NW_023503279.1	605000	2	-1.11882			NW_023503279.1	590000	20	2.05375			NW_023503279.1	590000	21	1.35954
NW_023503279.1	610000	2	-1.48214			NW_023503279.1	595000	29	2.70998			NW_023503279.1	595000	29	1.92266
NW_023503279.1	615000	5	-1.60861			NW_023503279.1	600000	13	0.345251			NW_023503279.1	600000	13	-0.26727
NW_023503279.1	620000	14	-1.9901			NW_023503279.1	605000	14	0.0865788			NW_023503279.1	605000	14	-0.588813
NW_023503279.1	625000	9	-1.84563			NW_023503279.1	610000	10	-1.59147			NW_023503279.1	610000	10	-1.75528
NW_023503279.1	630000	2	-1.11882			NW_023503279.1	615000	12	-0.0571812			NW_023503279.1	615000	13	-0.79983
NW_023503279.1	635000	0	nan			NW_023503279.1	620000	16	0.663121			NW_023503279.1	620000	18	-0.221302
NW_023503279.1	640000	3	-1.29256			NW_023503279.1	625000	12	0.12902			NW_023503279.1	625000	14	-0.290722
NW_023503279.1	645000	2	-1.30048			NW_023503279.1	630000	11	-1.17462			NW_023503279.1	630000	11	-1.50497
NW_023503279.1	650000	3	-0.40643			NW_023503279.1	635000	15	2.27			NW_023503279.1	635000	15	1.12236
NW_023503279.1	655000	9	-1.79967			NW_023503279.1	640000	47	2.26923			NW_023503279.1	640000	47	0.921176
NW_023503279.1	660000	1	-0.845192			NW_023503279.1	645000	6	-0.406021			NW_023503279.1	645000	8	-1.27286
NW_023503279.1	665000	1	-0.845192			NW_023503279.1	650000	8	-1.45943			NW_023503279.1	650000	9	-1.22688
NW_023503279.1	670000	8	-1.76363			NW_023503279.1	655000	13	-0.853652			NW_023503279.1	655000	13	-1.08459
NW_023503279.1	675000	20	-1.96881			NW_023503279.1	660000	7	1.26783			NW_023503279.1	660000	7	1.04129
NW_023503279.1	680000	1	-0.845192			NW_023503279.1	665000	8	-1.06493			NW_023503279.1	665000	8	-0.833295
NW_023503279.1	685000	14	-1.87732			NW_023503279.1	670000	14	0.863633			NW_023503279.1	670000	15	0.811533
NW_023503279.1	690000	0	nan			NW_023503279.1	675000	11	0.0390375			NW_023503279.1	675000	31	-1.69959
NW_023503279.1	695000	2	-0.629727			NW_023503279.1	680000	14	-1.48938			NW_023503279.1	680000	14	-1.78575
NW_023503279.1	700000	2	-1.12813			NW_023503279.1	685000	16	1.47738			NW_023503279.1	685000	16	0.754371
NW_023503279.1	705000	5	-1.68318			NW_023503279.1	690000	9	-1.15068			NW_023503279.1	690000	9	-1.50669
NW_023503279.1	710000	5	-1.70672			NW_023503279.1	695000	6	-0.870934			NW_023503279.1	695000	6	-1.01457
NW_023503279.1	715000	2	-1.11882			NW_023503279.1	700000	9	-0.621265			NW_023503279.1	700000	9	-1.04798
NW_023503279.1	720000	1	-0.845192			NW_023503279.1	705000	10	-1.18943			NW_023503279.1	705000	11	-0.19298
NW_023503279.1	725000	0	nan			NW_023503279.1	710000	24	1.02622			NW_023503279.1	710000	26	0.549749
NW_023503279.1	730000	6	-1.5121			NW_023503279.1	715000	10	-0.746143			NW_023503279.1	715000	10	-1.1768
NW_023503279.1	735000	0	nan			NW_023503279.1	720000	3	-1.11472			NW_023503279.1	720000	4	-1.43931
NW_023503279.1	740000	5	-1.51051			NW_023503279.1	725000	6	-1.42646			NW_023503279.1	725000	6	-1.61121
NW_023503279.1	745000	2	0.562725			NW_023503279.1	730000	18	-1.57219			NW_023503279.1	730000	18	-1.73037
NW_023503279.1	750000	0	nan			NW_023503279.1	735000	6	-1.20425			NW_023503279.1	735000	6	-1.43869
NW_023503279.1	755000	1	-0.845192			NW_023503279.1	740000	8	-1.12488			NW_023503279.1	740000	10	-0.760442
NW_023503279.1	760000	2	-1.11882			NW_023503279.1	745000	7	-1.04173			NW_023503279.1	745000	8	-0.981544
NW_023503279.1	765000	0	nan			NW_023503279.1	750000	4	-1.21966			NW_023503279.1	750000	4	-1.39096
NW_023503279.1	770000	1	-1.11966			NW_023503279.1	755000	6	-0.757672			NW_023503279.1	755000	6	-0.821719
NW_023503279.1	775000	3	-0.706925			NW_023503279.1	760000	4	-0.808442			NW_023503279.1	760000	6	-1.44434
NW_023503279.1	780000	1	-0.845192			NW_023503279.1	765000	6	-1.21611			NW_023503279.1	765000	6	-1.45866
NW_023503279.1	785000	2	-1.11882			NW_023503279.1	770000	4	-1.14345			NW_023503279.1	770000	5	-1.53555
NW_023503279.1	790000	7	-2.10274			NW_023503279.1	775000	8	-1.67808			NW_023503279.1	775000	10	-1.80199
NW_023503279.1	795000	2	-1.11882			NW_023503279.1	780000	8	-1.37253			NW_023503279.1	780000	8	-1.01815
NW_023503279.1	800000	0	nan			NW_023503279.1	785000	7	-0.721408			NW_023503279.1	785000	8	-1.24815
NW_023503279.1	805000	1	-1.11966			NW_023503279.1	790000	7	-0.0519161			NW_023503279.1	790000	13	-1.36976
NW_023503279.1	810000	2	-0.485328			NW_023503279.1	795000	9	-1.15941			NW_023503279.1	795000	10	-1.13282
NW_023503279.1	815000	1	-0.845192			NW_023503279.1	800000	2	0.0920148			NW_023503279.1	800000	2	-0.394218
NW_023503279.1	820000	0	nan			NW_023503279.1	805000	5	-1.06297			NW_023503279.1	805000	6	-1.49595
NW_023503279.1	825000	1	-1.11966			NW_023503279.1	810000	6	-0.696187			NW_023503279.1	810000	7	-0.841323
NW_023503279.1	830000	1	-0.845192			NW_023503279.1	815000	5	-1.17987			NW_023503279.1	815000	6	-1.5419
NW_023503279.1	835000	0	nan			NW_023503279.1	820000	7	-1.14369			NW_023503279.1	820000	7	-1.44629
NW_023503279.1	840000	1	-0.845192			NW_023503279.1	825000	5	-0.86978			NW_023503279.1	825000	6	-1.38935
NW_023503279.1	845000	0	nan			NW_023503279.1	830000	6	-0.897901			NW_023503279.1	830000	7	-1.37252
NW_023503279.1	850000	0	nan			NW_023503279.1	835000	4	-0.275011			NW_023503279.1	835000	4	-0.749409
NW_023503279.1	855000	0	nan			NW_023503279.1	840000	7	-0.963811			NW_023503279.1	840000	7	-0.72107
NW_023503279.1	860000	3	-1.71231			NW_023503279.1	845000	2	-0.718584			NW_023503279.1	845000	2	-0.932008
NW_023503279.1	865000	1	-0.845192			NW_023503279.1	850000	10	-2.05213			NW_023503279.1	850000	10	-2.11239
NW_023503279.1	870000	0	nan			NW_023503279.1	855000	2	-1.0721			NW_023503279.1	855000	2	-1.15068
NW_023503279.1	875000	3	-1.29256			NW_023503279.1	860000	7	-0.813752			NW_023503279.1	860000	10	-1.6055
NW_023503279.1	880000	0	nan			NW_023503279.1	865000	5	-0.194222			NW_023503279.1	865000	6	-0.971254
NW_023503279.1	885000	2	-1.30048			NW_023503279.1	870000	6	-0.596948			NW_023503279.1	870000	6	-1.05261
NW_023503279.1	890000	1	-1.11966			NW_023503279.1	875000	11	-0.886904			NW_023503279.1	875000	12	-0.993158
NW_023503279.1	895000	1	1.24499			NW_023503279.1	880000	5	-0.900004			NW_023503279.1	880000	5	-1.22145
NW_023503279.1	900000	1	-0.845192			NW_023503279.1	885000	9	0.287148			NW_023503279.1	885000	11	-0.35718
NW_023503279.1	905000	1	-0.845192			NW_023503279.1	890000	6	-1.09961			NW_023503279.1	890000	7	-1.5396
NW_023503279.1	910000	0	nan			NW_023503279.1	895000	7	-1.35627			NW_023503279.1	895000	7	-0.917449
NW_023503279.1	915000	2	-1.30048			NW_023503279.1	900000	5	-0.839016			NW_023503279.1	900000	5	-0.244747
NW_023503279.1	920000	0	nan			NW_023503279.1	905000	4	-1.29874			NW_023503279.1	905000	5	-1.57538
NW_023503279.1	925000	0	nan			NW_023503279.1	910000	3	-1.0154			NW_023503279.1	910000	3	-1.20106
NW_023503279.1	930000	1	-0.845192			NW_023503279.1	915000	2	-1.18693			NW_023503279.1	915000	3	-0.0915774
NW_023503279.1	935000	2	-1.30048			NW_023503279.1	920000	1	-0.52602			NW_023503279.1	920000	1	-0.690333
NW_023503279.1	940000	2	-1.11882			NW_023503279.1	925000	5	-0.248365			NW_023503279.1	925000	5	-0.820343
NW_023503279.1	945000	0	nan			NW_023503279.1	930000	3	-1.0154			NW_023503279.1	930000	4	-1.38996
NW_023503279.1	950000	3	-1.03425			NW_023503279.1	935000	5	-1.55887			NW_023503279.1	935000	7	-1.86735
NW_023503279.1	955000	2	-1.01001			NW_023503279.1	940000	11	-0.219145			NW_023503279.1	940000	12	-0.828379
NW_023503279.1	960000	0	nan			NW_023503279.1	945000	7	-1.338			NW_023503279.1	945000	7	-1.57092
NW_023503279.1	965000	1	-0.845192			NW_023503279.1	950000	7	-1.5727			NW_023503279.1	950000	7	-0.0564783
NW_023503279.1	970000	0	nan			NW_023503279.1	955000	2	-1.25054			NW_023503279.1	955000	4	-1.59795
NW_023503279.1	975000	0	nan			NW_023503279.1	960000	6	-1.03274			NW_023503279.1	960000	6	-1.36151
NW_023503279.1	980000	2	-1.11882			NW_023503279.1	965000	3	-0.222529			NW_023503279.1	965000	3	-0.115631
NW_023503279.1	985000	0	nan			NW_023503279.1	970000	4	-0.637342			NW_023503279.1	970000	4	-1.00064
NW_023503279.1	990000	4	-1.53151			NW_023503279.1	975000	4	-0.66466			NW_023503279.1	975000	4	-1.03105
NW_023503279.1	995000	1	-0.845192			NW_023503279.1	980000	4	-0.263509			NW_023503279.1	980000	4	-0.215036
NW_023503279.1	1000000	0	nan			NW_023503279.1	985000	5	-1.17003			NW_023503279.1	985000	5	-1.41093
NW_023503279.1	1005000	3	-1.43248			NW_023503279.1	990000	11	-0.109654			NW_023503279.1	990000	12	-0.535563
NW_023503279.1	1010000	1	0.111926			NW_023503279.1	995000	2	0.677447			NW_023503279.1	995000	3	-0.474636
NW_023503279.1	1015000	0	nan			NW_023503279.1	1000000	5	-0.583068			NW_023503279.1	1000000	5	-1.00878
NW_023503279.1	1020000	2	-1.30048			NW_023503279.1	1005000	3	-0.222529			NW_023503279.1	1005000	5	-0.802355
NW_023503279.1	1025000	1	-0.845192			NW_023503279.1	1010000	5	-0.546152			NW_023503279.1	1010000	5	-0.718414
NW_023503279.1	1030000	55	1.04373			NW_023503279.1	1015000	1	-0.8912			NW_023503279.1	1015000	1	-0.911574
NW_023503279.1	1035000	2	0.739578			NW_023503279.1	1020000	8	-1.01627			NW_023503279.1	1020000	9	-1.46791
NW_023503278.1	0	1	-0.845192			NW_023503279.1	1025000	4	-0.244817			NW_023503279.1	1025000	4	-0.672145
NW_023503278.1	5000	1	-1.11966			NW_023503279.1	1030000	93	2.32559			NW_023503279.1	1030000	93	1.78194
NW_023503278.1	10000	1	-0.845192			NW_023503279.1	1035000	8	-0.331315			NW_023503279.1	1035000	8	-0.585363
NW_023503278.1	15000	0	nan			NW_023503278.1	0	6	-0.990942			NW_023503278.1	0	6	-1.06118
NW_023503278.1	20000	3	-1.1957			NW_023503278.1	5000	3	-1.38831			NW_023503278.1	5000	4	-1.62973
NW_023503278.1	25000	3	-1.29256			NW_023503278.1	10000	7	-1.26585			NW_023503278.1	10000	7	-1.45741
NW_023503278.1	30000	0	nan			NW_023503278.1	15000	7	-0.884934			NW_023503278.1	15000	7	-1.25665
NW_023503278.1	35000	2	-1.11882			NW_023503278.1	20000	5	-1.57235			NW_023503278.1	20000	5	-1.39226
NW_023503278.1	40000	3	-1.29256			NW_023503278.1	25000	6	-0.994982			NW_023503278.1	25000	6	-0.508335
NW_023503278.1	45000	5	-1.51051			NW_023503278.1	30000	5	-1.05559			NW_023503278.1	30000	5	-1.31714
NW_023503278.1	50000	3	-1.29256			NW_023503278.1	35000	3	0.349032			NW_023503278.1	35000	3	-0.0771451
NW_023503278.1	55000	1	-0.845192			NW_023503278.1	40000	4	0.035558			NW_023503278.1	40000	6	-0.683107
NW_023503278.1	60000	1	-0.845192			NW_023503278.1	45000	7	-0.836838			NW_023503278.1	45000	8	-0.01335
NW_023503278.1	65000	0	nan			NW_023503278.1	50000	7	-0.483816			NW_023503278.1	50000	7	-0.599469
NW_023503278.1	70000	3	-0.80465			NW_023503278.1	55000	5	-0.49447			NW_023503278.1	55000	5	-0.189929
NW_023503278.1	75000	2	-1.11882			NW_023503278.1	60000	4	-0.999672			NW_023503278.1	60000	4	-1.16415
NW_023503278.1	80000	1	1.66724			NW_023503278.1	65000	2	-1.31528			NW_023503278.1	65000	2	-1.29903
NW_023503278.1	85000	0	nan			NW_023503278.1	70000	4	-1.60643			NW_023503278.1	70000	5	-0.572374
NW_023503278.1	90000	1	-1.11966			NW_023503278.1	75000	14	-1.89457			NW_023503278.1	75000	14	-1.27182
NW_023503278.1	95000	0	nan			NW_023503278.1	80000	8	-1.84958			NW_023503278.1	80000	8	-1.46717
NW_023503278.1	100000	8	-1.13287			NW_023503278.1	85000	5	-1.04944			NW_023503278.1	85000	5	-1.29701
NW_023503278.1	105000	6	-1.12285			NW_023503278.1	90000	9	-1.26487			NW_023503278.1	90000	10	-1.69808
NW_023503278.1	110000	2	-0.946471			NW_023503278.1	95000	11	-0.135337			NW_023503278.1	95000	11	-0.881305
NW_023503278.1	115000	0	nan			NW_023503278.1	100000	9	-0.89385			NW_023503278.1	100000	13	-1.20723
NW_023503278.1	120000	1	-0.845192			NW_023503278.1	105000	10	-1.01172			NW_023503278.1	105000	12	-1.32895
NW_023503278.1	125000	0	nan			NW_023503278.1	110000	9	-1.1261			NW_023503278.1	110000	10	-1.07548
[truncated: 612 more rows]

## Sheet: TableS4 -epidemiology
Table S4. Timeline of stay in different units in the hospitals for selected patients (shaded information idicates putative linkage)
Patient	Isolate code	COVID-19	Locations and Date		Locations and Date
Clade I
P1	cvcan33	Yes			HGH Male Med2 rooms 654,655,656,657,659	21/04/2020 to 23/06/2020
P2	CPARA33	Yes	HGH MICU2	02/05/2020 to 23/07/2020	HGH Male Med2 room 584	24/07/2020 to 29/07/2020
P3	CPARA34	Yes			HGH Male Med2 room 584	19/07/2020 to 20/09/2020
P4	cvcan19	No	HGH MICU2	15/08/2020 to 19/11/2020
Clade IV			Locations and Date		Locations and Date		Locations and Date
P5	CPARA26	Yes	HMGH ICU6	19/04/2020 to 27/04/2020	HMGH ICU1	27/04/2020 to 03/06/2020	HMGH ICU2	03/06/2020 to 09/08/2020
P6	CPARA29	Yes	HMGH ICU8	18/05/2020 to 25/06/2020	HMGH ICU1	27/06/2020 to 08/07/2020	HMGH ICU6	08/07/2020 to 17/07/2020	HMGH ICU8	17/07/2020 to 02/08/2020
P7	CPARA32	Yes			HMGH ICU1	22/06/2020 to 08/07/2020	HMGH ICU6	08/07/2020 to 14/07/2020	HMGH ICU8	14/07/2020 to 24/07/2020
Clade III			Locations and Date		Locations and Date		Locations and Date		Locations and Date
P8	cvcan39	No	HMGH Ward G	10/02/2021 to 12/02/2021	HMGH ICU8	12/02/2021 to 25/02/2021	HGH ICU1 room26 and 19	25/02/2021 TO 30/03/2021	HGH Female Med2 room 551	30/03/2021 to 06/04/2021
P9	cvcan7	Yes	HMGH Ward H and F	26/03/2021 to 29/03/2021	HMGH ICU7	2021-03-29	HGH SSC5 East	29/03/2021 to 11/04/2021	HGH SSC5 West	11/04/2021 to 19/04/2021
P10	CPARA30	No	HGH Medical ICU1 ROOM 207	28/05/2020 TO 05/06/2020	HGH Medical ICU2 ROOM 228	05/06/2020 to 10/06/2020	HGH MICU1 Room 207	10/06/2020 to 11/06/2020	HGH SICU2	11/06/2020 to 16/06/2020	HGH Medical ICU2	16/06/2020 to 30/06/2020	HGH Female Med1 room 501 and 510	30/06/2020 to 29/10/2020
P11	cvcan31	No	HGH TICU	26/04/2020 to 01/06/2020	HGH TSDU	01/06/2020 to 29/06/2020	HGH TICU	29/06/2020 to 14/07/2020	HGH TSDU	14/07/2020 to 27/07/2020	HGH Trauma surgery	27/07/2020 to 27/08/2020

## Sheet: TableS5-panel-gene
TableS5. List of 50 major genes associated with antifungal resistance and adaptations screened for mutations (information from Candida genome database)
Gene	ID	Description
FUR1	CPAR2_502030	Ortholog(s) have uracil phosphoribosyltransferase activity and role in pyrimidine-containing compound salvage
TAC1b	CPAR2_303520	Has domain(s) with predicted DNA binding, DNA-binding transcription factor activity, RNA polymerase II-specific, zinc ion binding activity and role in regulation of transcription, DNA-templated, transcription, DNA-templated
ERG2	CPAR2_201490	Ortholog(s) have C-8 sterol isomerase activity and role in ergosterol biosynthetic process
ERG3	CPAR2_105550	C-5 sterol desaturase involved in ergosterol biosynthesis; mutations confer resistance to azoles and echinocandins
ERG6	CPAR2_405010	Ortholog(s) have sterol 24-C-methyltransferase activity, role in ergosterol biosynthetic process and endoplasmic reticulum, lipid droplet localization
CDR1	CPAR2_405290	Putative transmembrane xenobiotic transporter, overexpressed in response to fluconazole; likely involved in cellular cation homeostasis (1)Ortholog(s) have ABC-type xenobiotic transporter activity, role in cellular cation homeostasis, response to drug, xenobiotic detoxification by transmembrane export across the plasma membrane and plasma membrane localization
CDR2	CPAR2_401370	ORF, Uncharacterized
MDR1	CPAR2_301760	Ortholog(s) have fluconazole transmembrane transporter activity, role in xenobiotic detoxification by transmembrane export across the plasma membrane and plasma membrane localization
PMS1	CPAR2_806260	Ortholog(s) have ATP binding, ATPase, DNA insertion or deletion binding, dinucleotide insertion or deletion binding, double-stranded DNA binding, heteroduplex DNA loop binding, single-stranded DNA binding activity
ERG11	CPAR2_303740	Putative sterol 14-demethylase activity; mutations involved in fluconazole resistance
STE6	CPAR2_404230	Ortholog(s) have ABC-type oligopeptide transporter activity, ABC-type peptide transporter activity and role in conjugation with cellular fusion, peptide pheromone export, peptide pheromone export by transmembrane transport
YMC1	CPAR2_208040	Ortholog(s) have glycine transmembrane transporter activity, organic acid transmembrane transporter activity and role in glycine import into mitochondrion, heme biosynthetic process, mitochondrial transport
MLH1	CPAR2_401150	Ortholog(s) have ATP binding, ATPase activity, role in meiotic heteroduplex formation, meiotic mismatch repair, mismatch repair, reciprocal meiotic recombination and MutLalpha complex, MutLbeta complex, MutLgamma complex localization
FKS1	CPAR2_106400	Putative 1,3-beta-D-glucan synthase, involved in fluconazole resistance
FKS2	CPAR2_804030	Putative 1,3-beta-D-glucan synthase involved in cell wall glucan biosynthesis; target of echinocandin
UPC2	CPAR2_207280	Transcription factor involved in regulation of ergosterol and lipid biosynthesis
Ndt80	CPAR2_213640	Putative DNA-binding transcription factor, involved in transcriptional regulation of genes implicated in morphogenesis, adhesion and biofilm formation
MRR1	CPAR2_807270	Regulator of MDR1 transcription; expression increased in fluconazole and voriconazole resistant strains
ERG5	CPAR2_703970	Ortholog(s) have C-22 sterol desaturase activity and role in ergosterol biosynthetic process
MSH2	CPAR2_500160	Ortholog(s) have ATP binding, ATPase, DNA insertion or deletion binding, Y-form DNA binding, double-strand/single-strand DNA junction binding, four-way junction DNA binding and guanine/thymine mispair binding
PDR1	CPAR2_102000	Has domain(s) with predicted DNA-binding transcription factor activity, RNA polymerase II-specific, zinc ion binding activity and role in regulation of DNA-templated transcription
HOG1	CPAR2_211840	Ortholog(s) have MAP kinase activity, RNA polymerase II CTD heptapeptide repeat kinase activity, calmodulin binding, chromatin binding activity
ERG7	CPAR2_301800	Ortholog(s) have lanosterol synthase activity, role in ergosterol biosynthetic process and lipid droplet localization
ERG25	CPAR2_801410	Ortholog(s) have C-4 methylsterol oxidase activity, role in ergosterol biosynthetic process and endoplasmic reticulum, endoplasmic reticulum membrane, plasma membrane localization
ERG26	CPAR2_302110	Ortholog(s) have C-3 sterol dehydrogenase (C-4 sterol decarboxylase) activity, sterol-4-alpha-carboxylate 3-dehydrogenase (decarboxylating) activity and role in ergosterol biosynthetic process
ERG28	CPAR2_213750	Ortholog(s) have protein-macromolecule adaptor activity, role in ergosterol biosynthetic process and endoplasmic reticulum membrane localization
ERG24	CPAR2_405900	Ortholog(s) have delta14-sterol reductase activity and role in ergosterol biosynthetic process
ERG20	CPAR2_103950	Ortholog(s) have dimethylallyltranstransferase activity, farnesyltranstransferase activity, geranyltranstransferase activity, isopentenyl-diphosphate delta-isomerase activity
ERG29	CPAR2_302020	Ortholog(s) have role in ergosterol biosynthetic process, intracellular iron ion homeostasis, mitochondrion organization
ERG27	CPAR2_801560	Ortholog(s) have 3-keto sterol reductase activity, role in ergosterol biosynthetic process and endoplasmic reticulum, endoplasmic reticulum membrane, lipid droplet localization
LIP1	CPAR2_703190	Predicted triglyceride lipase; expression S. cerevisiae yields an inactive protein
LIP2	CPAR2_703200	Lipase; demonstrates activity in vivo; glycosylated
UME6	CPAR2_803820	Has domain(s) with predicted DNA-binding transcription factor activity, RNA polymerase II-specific, zinc ion binding activity and role in regulation of DNA-templated transcription
GZF3	CPAR2_800210	Ortholog(s) have DNA-binding transcription factor activity, RNA polymerase II-specific, sequence-specific DNA binding activity
cph2	CPAR2_603440	Ortholog(s) have role in pseudohyphal growth
czf1	CPAR2_501290	Has domain(s) with predicted DNA-binding transcription factor activity, RNA polymerase II-specific, zinc ion binding activity and role in regulation of DNA-templated transcription
ace2	CPAR2_204370	Ortholog(s) have DNA-binding transcription factor activity, RNA polymerase II-specific, cis-regulatory region sequence-specific DNA binding activity
bcr1	CPAR2_205990	Transcription factor involved in biofilm formation; has domain(s) with predicted nucleic acid binding, zinc ion binding activity and intracellular localization
efg1	CPAR2_701620	APSES family DNA binding transcription factor involved in control of concentric-to-smooth colony morphology switch and biofilm formation
sapp1	CPAR2_102410	Secreted aspartic protease; activated by autocatalytic cleavage of a pro-sequence; induced by exogenous proteins;
sapp2	CPAR2_102580	Secreted aspartic protease; constitutively expressed
sapp3	CPAR2_102420	Predicted aspartic-type endopeptidase
rbt1	CPAR2_403510	expression induced in biofilms and hypoxia; required for normal biofilm development
mkc1	CPAR2_800090	Ortholog(s) have MAP kinase activity, protein serine/threonine kinase activity
nrg1	CPAR2_300790	Ortholog(s) have sequence-specific DNA binding activity
ARR3	CPAR2_601050	Ortholog(s) have antimonite transmembrane transporter activity, antiporter activity, arsenite transmembrane transporter activity, role in antimonite transport, arsenite transport and plasma membrane localization
RTA3	CPAR2_104610	Putative lipid translocase; implicated in antifungal drug resistance (Ding C, et al. (2011) Conserved and divergent roles of Bcr1 and CFEM proteins in Candida parapsilosis and Candida albicans. PLoS One 6(12):e28151; West PT, et al. (2021) Genetic and behavioral adaptation of Candida parapsilosis to the microbiome of hospitalized infants revealed by in situ genomics, transcriptomics, and proteomi…
hwp1	CPAR2_403520	Putative hyphal cell wall protein,
SPT3	CPAR2_200390	Ortholog(s) have transcription coregulator activity and role in chromatin organization, invasive growth in response to glucose limitation, pseudohyphal growth, transcription by RNA polymerase II
TEC1	CPAR2_805930	Ortholog(s) have DNA-binding transcription activator activity, RNA polymerase II-specific, DNA-binding transcription factor activity, RNA polymerase II cis-regulatory region sequence-specific DNA binding activity

## Sheet: TableS6-varants-indels
Table S6. Variants discovered from the panel genes among C. parapsilosis isolates in Qatar (fluconazole resistant isolates in green)
Variants #	Gene ID	Gene name	Effect	Chromosome	Position	Amino Acid	CG15N	CG16N	CORTH8	CPARA12	CPARA16	CPARA17	CPARA18	CPARA19	CPARA1	CPARA20	CPARA21	CPARA22	CPARA23	CPARA24	CPARA25	CPARA26	CPARA27	CPARA28	CPARA29	CPARA2	CPARA30	CPARA31	CPARA32	CPARA33	CPARA34	CPARA3	CPARA4	CPARA5	CPARA6	CPARA7	CPARA8	CPARA9	SCG5	cvcan10	cvcan17	cvcan19	cvcan26	cvcan29	cvcan31	cvcan33	cvcan37	cvcan39	cvcan41
CDR1_1	CPAR2_405290	CDR1	downstream_gene_variant	6372	1187957	c.*3209T>C	0	0	0	0	0	0	0	0	0	0	0	0	0	0	0	0	0	0	0	0	1	0	0	0	0	0	0	0	0	0	0	0	0	0	0	0	0	0	1	0	0	1	0
CDR1_2	CPAR2_405290	CDR1	missense_variant	6372	1195331	p.Gly117Asp/c.350G>A	0	0	0	0	0	0	0	0	0	0	0	0	0	0	1	0	0	0	0	0	0	1	0	0	0	0	0	0	0	0	0	0	1	0	0	0	0	1	0	0	1	0	0
CDR1_3	CPAR2_405290	CDR1	synonymous_variant	6372	1192462	p.Leu1073Leu/c.3219A>G	0	0	0	0	0	0	0	0	0	0	0	0	0	0	0	0	0	0	0	0	0	0	0	0	1	0	0	0	0	0	0	0	0	0	1	0	0	0	0	1	0	0	0
CDR1_4	CPAR2_405290	CDR1	downstream_gene_variant	6372	1189511	c.*1655T>A	0	1	0	0	0	0	0	0	0	0	0	0	0	0	0	0	0	0	0	0	0	0	0	0	0	0	0	0	0	0	0	0	0	0	0	0	0	0	0	0	0	0	0
CDR1_5	CPAR2_405290	CDR1	synonymous_variant	6372	1191364	p.Gly1439Gly/c.4317G>A	0	0	0	0	0	0	0	0	0	0	0	0	0	0	0	0	0	0	0	0	0	0	0	0	0	0	0	0	0	0	0	0	0	0	0	0	0	0	0	0	0	0	0
CDR1_6	CPAR2_405290	CDR1	missense_variant	6372	1191822	p.Ile1287Val/c.3859A>G	0	0	1	0	0	1	0	0	0	0	1	0	0	0	0	0	0	0	0	0	0	0	0	0	0	0	0	0	0	0	0	1	0	0	0	0	0	0	0	0	0	0	0
CDR1_7	CPAR2_405290	CDR1	upstream_gene_variant	6372	1200621	c.-4941C>T	0	0	0	0	0	0	0	0	0	0	0	0	0	0	0	0	0	0	0	0	0	0	0	0	0	0	0	0	0	0	0	0	0	0	0	0	0	0	0	0	0	0	0
CDR1_8	CPAR2_405290	CDR1	downstream_gene_variant	6372	1189918	c.*1248C>T	0	0	1	0	0	0	0	0	0	0	0	0	0	0	0	0	0	0	0	0	0	0	0	0	0	0	0	0	0	0	0	1	0	0	0	0	0	0	0	0	0	0	0
CDR1_9	CPAR2_405290	CDR1	downstream_gene_variant	6372	1189591	c.*1575T>C	0	0	0	0	0	0	0	0	0	0	0	0	1	0	0	0	0	0	0	0	0	0	0	0	0	0	0	0	0	0	0	0	0	0	0	0	0	0	0	0	0	0	0
CDR4_1	CPAR2_304370	CDR4	synonymous_variant	5806	1032163	p.Tyr1175Tyr/c.3525C>T	0	0	1	0	0	0	0	0	0	0	0	0	0	1	0	0	0	0	0	0	0	0	0	0	0	0	0	0	0	0	0	0	0	0	0	0	0	0	0	0	0	0	0
CDR4_2	CPAR2_304370	CDR4	missense_variant	5806	1031986	p.Pro1234Leu/c.3696_3702delCATCCCAinsTATTCTG	0	0	0	0	0	0	0	0	0	0	0	0	0	0	0	0	0	0	0	0	0	0	0	0	0	0	0	0	0	0	0	0	0	0	0	0	0	0	0	0	0	0	0
CDR4_3	CPAR2_304370	CDR4	synonymous_variant	5806	1035616	p.Ser24Ser/c.72G>A	1	1	0	1	1	0	0	1	1	0	0	1	0	0	0	0	1	0	0	1	0	0	0	1	1	0	0	1	0	1	0	0	0	1	1	1	1	0	1	1	0	0	1
CDR4_4	CPAR2_304370	CDR4	synonymous_variant	5806	1031731	p.Asn1319Asn/c.3957C>T	1	1	0	0	1	0	1	1	0	0	0	1	0	0	0	0	1	0	0	1	0	1	0	1	1	1	1	1	0	1	1	0	1	1	1	1	1	1	0	1	1	0	1
CDR4_5	CPAR2_304370	CDR4	missense_variant	5806	1031691	p.Val1333Ile/c.3997G>A	1	1	0	0	1	0	1	1	0	0	0	1	0	0	1	0	1	0	0	1	0	1	0	1	1	1	1	1	0	1	1	0	1	1	1	1	1	1	0	1	1	0	1
CDR4_6	CPAR2_304370	CDR4	synonymous_variant	5806	1031331	p.Arg1453Arg/c.4357C>A	1	1	0	1	1	0	0	1	0	0	0	1	0	0	0	0	1	0	0	1	0	0	0	1	1	0	0	1	0	1	0	0	0	1	1	1	1	0	0	1	0	0	1
CDR4_7	CPAR2_304370	CDR4	missense_variant	5806	1031624	p.Ala1355Gly/c.4062_4064delAGCinsGGG	1	1	0	0	1	0	0	1	0	0	0	1	0	0	1	0	1	0	0	1	0	1	0	1	1	0	0	1	0	1	0	0	1	1	1	1	1	1	0	1	1	0	1
CDR4_8	CPAR2_304370	CDR4	synonymous_variant	5806	1031392	p.Ser1432Ser/c.4296C>T	0	0	0	1	0	0	0	0	0	0	0	0	0	0	0	0	0	0	0	0	0	0	0	0	0	0	0	0	0	0	0	0	0	0	0	0	0	0	0	0	0	0	0
CDR4_9	CPAR2_304370	CDR4	missense_variant	5806	1031962	p.AsnThrMetValGlu1236ThrThrMetIleAsp/c.3707_3726delACACCATGGTTGAACAATTGinsCCACTATGATAGACCAGTTA	0	0	0	0	0	0	0	0	0	0	0	0	0	0	0	0	0	0	0	0	0	0	0	0	0	0	0	0	0	0	0	0	0	0	0	0	0	0	0	0	0	0	0
CDR4_10	CPAR2_304370	CDR4	synonymous_variant	5806	1034776	p.Arg304Arg/c.912A>G	0	0	0	0	0	0	0	0	0	0	0	0	0	0	0	0	0	0	0	0	0	0	1	0	0	0	0	0	0	0	0	0	0	0	0	0	0	0	0	0	0	0	0
CDR4_11	CPAR2_304370	CDR4	downstream_gene_variant	5806	1028549	c.*2642G>A	0	0	0	0	0	0	0	0	1	1	0	0	0	0	0	0	0	0	0	0	1	0	0	0	0	0	0	0	0	0	0	0	0	0	0	0	0	0	1	0	0	1	0
CDR4_12	CPAR2_304370	CDR4	downstream_gene_variant	5806	1029722	c.*1469C>T	0	0	0	0	0	0	0	0	0	0	0	0	1	1	0	0	0	0	0	0	0	0	0	0	0	0	0	0	0	0	0	0	0	0	0	0	0	0	0	0	0	0	0
CDR4_13	CPAR2_304370	CDR4	missense_variant	5806	1032806	p.Ser961Leu/c.2882C>T	0	0	0	0	0	0	0	0	0	0	0	0	1	0	0	0	0	0	0	0	0	0	0	0	0	0	0	0	0	0	0	0	0	0	0	0	0	0	0	0	0	0	0
CDR4_14	CPAR2_304370	CDR4	missense_variant	5806	1032821	p.Ala956Glu/c.2867C>A	0	0	0	0	0	0	0	0	0	0	0	0	1	0	0	0	0	0	0	0	0	0	0	0	0	0	0	0	0	0	0	0	0	0	0	0	0	0	0	0	0	0	0
CDR4_15	CPAR2_304370	CDR4	synonymous_variant	5806	1034254	p.Arg478Arg/c.1434C>T	0	0	1	0	0	1	0	0	0	1	1	0	1	0	0	0	0	1	1	0	0	0	0	0	0	0	0	0	0	0	0	0	0	0	0	0	0	0	1	0	0	0	0
CDR4_16	CPAR2_304370	CDR4	synonymous_variant	5806	1034182	p.Thr502Thr/c.1506C>A	0	0	1	0	0	1	0	0	0	1	1	0	1	1	0	0	0	0	1	0	0	0	1	0	0	0	0	0	0	0	0	1	0	0	0	0	0	0	1	0	0	0	0
CDR4_17	CPAR2_304370	CDR4	synonymous_variant	5806	1034167	p.Ser507Ser/c.1521T>C	0	0	1	0	0	0	0	0	0	1	0	0	1	1	0	0	0	0	0	0	0	0	0	0	0	0	0	0	0	0	0	1	0	0	0	0	0	0	1	0	0	0	0
CDR4_18	CPAR2_304370	CDR4	stop_gained	5806	1033566	p.Gln708*/c.2122C>T	0	0	1	0	0	0	0	0	0	0	0	0	0	0	0	0	0	0	0	0	0	0	0	0	0	0	0	0	0	0	0	1	0	0	0	0	0	0	0	0	0	0	0
CDR4_19	CPAR2_304370	CDR4	missense_variant	5806	1032284	p.Ser1135Leu/c.3404C>T	0	0	0	0	0	0	0	0	0	0	0	0	0	0	1	0	0	0	0	0	0	1	0	0	0	0	0	0	0	0	0	0	1	0	0	0	0	1	0	0	1	0	0
CDR4_20	CPAR2_304370	CDR4	missense_variant	5806	1032117	p.ThrProArg1189SerProGly/c.3562_3571delCGAACACCAAinsAGATCGCCAG	0	0	1	0	0	1	0	0	0	0	0	0	1	0	0	0	0	0	0	0	0	0	0	0	0	0	0	0	0	0	0	1	0	0	0	0	0	0	0	0	0	0	0
CDR4_21	CPAR2_304370	CDR4	missense_variant	5806	1032075	p.SerIle1204AlaLeu/c.3609_3613delATCAAinsGGCTC	0	0	1	0	0	0	0	0	0	0	0	0	1	0	0	0	0	0	0	0	0	0	0	0	0	0	0	0	0	0	0	1	0	0	0	0	0	0	0	0	0	0	0
CDR4_22	CPAR2_304370	CDR4	missense_variant	5806	1032045	p.Asn1215Asp/c.3633_3643delTTTTAAAGCCAinsCTTCAAGGCTG	0	0	1	0	0	0	0	0	0	0	0	0	1	0	0	0	0	0	0	0	0	0	0	0	0	0	0	0	0	0	0	1	0	0	0	0	0	0	0	0	0	0	0
CDR4_23	CPAR2_304370	CDR4	synonymous_variant	5806	1031953	p.Gln1245Gln/c.3735G>A	0	0	1	0	0	0	0	0	0	0	0	0	1	0	0	0	0	0	0	0	0	0	0	0	0	0	0	0	0	0	0	1	0	0	0	0	0	0	0	0	0	0	0
CDR4_24	CPAR2_304370	CDR4	synonymous_variant	5806	1031887	p.Ala1267Ala/c.3801A>G	0	0	1	0	0	0	0	0	0	0	1	0	1	0	0	0	0	0	0	0	0	0	0	0	0	0	0	0	0	0	0	1	0	0	0	0	0	0	0	0	0	0	0
CDR4_25	CPAR2_304370	CDR4	synonymous_variant	5806	1031878	p.Thr1270Thr/c.3810C>A	0	0	1	0	0	0	0	0	0	0	0	0	1	0	0	0	0	0	0	0	0	0	0	0	0	0	0	0	0	0	0	1	0	0	0	0	0	0	0	0	0	0	0
CDR4_26	CPAR2_304370	CDR4	synonymous_variant	5806	1034017	p.Leu557Leu/c.1671G>A	0	0	0	0	0	0	0	0	0	0	0	0	0	0	0	0	0	0	0	0	0	0	0	0	0	0	0	0	0	0	0	0	0	0	0	0	0	0	1	0	0	0	0
CDR4_27	CPAR2_304370	CDR4	upstream_gene_variant	5806	1036427	c.-740G>T	0	0	0	0	0	1	0	0	0	0	1	0	0	0	0	0	0	0	0	0	0	0	0	0	0	0	0	0	0	0	0	0	0	0	0	0	0	0	0	0	0	0	0
CDR4_28	CPAR2_304370	CDR4	synonymous_variant	5806	1032085	p.1202/c.3600_3603delCATTinsTATC	0	0	1	0	0	0	0	0	0	0	0	0	1	0	0	0	0	0	0	0	0	0	0	0	0	0	0	0	0	0	0	1	0	0	0	0	0	0	0	0	0	0	0
CDR4_29	CPAR2_304370	CDR4	missense_variant	5806	1031698	p.Gly1329Ala/c.3986_3990delGTCTAinsCACTT	1	0	0	0	0	0	0	1	0	0	0	1	0	0	0	0	1	0	0	0	0	1	0	1	1	0	0	0	0	0	0	0	1	1	1	1	1	1	0	1	1	0	1
CDR4_30	CPAR2_304370	CDR4	synonymous_variant	5806	1034404	p.Thr428Thr/c.1284A>G	0	0	0	0	0	0	0	0	0	0	0	0	0	0	0	0	0	0	0	0	0	0	0	0	0	0	0	0	0	0	0	0	0	0	0	0	0	0	0	0	0	0	0
CDR4_31	CPAR2_304370	CDR4	synonymous_variant	5806	1033984	p.569/c.1701_1704delGATTinsAATC	0	0	0	1	0	0	0	1	0	0	0	0	0	0	0	1	1	0	0	0	0	0	0	0	0	0	0	0	0	0	0	0	0	1	0	1	0	0	0	0	0	0	0
CDR4_32	CPAR2_304370	CDR4	synonymous_variant	5806	1033984	p.Pro567Pro/c.1701G>A	0	0	0	0	0	0	0	0	0	0	0	0	0	0	0	0	0	0	0	0	1	0	0	0	0	0	0	0	0	0	0	0	0	0	0	0	0	0	0	0	0	0	0
CDR4_33	CPAR2_304370	CDR4	upstream_gene_variant	5806	1035940	c.-267delT	0	0	0	0	0	0	0	0	0	0	0	0	0	0	0	0	0	0	0	0	1	0	0	0	0	0	0	0	0	0	0	0	0	0	0	0	0	0	0	0	0	0	0
CDR4_34	CPAR2_304370	CDR4	upstream_gene_variant	5806	1038733	c.-3046T>C	0	0	1	0	0	0	0	0	0	0	1	0	0	0	0	0	0	0	0	0	0	0	0	0	0	0	0	0	0	0	0	0	0	0	0	0	0	0	0	0	0	0	0
CDR4_35	CPAR2_304370	CDR4	missense_variant	5806	1034094	p.Pro532Ser/c.1594C>T	0	0	0	1	0	0	0	0	0	0	0	0	0	0	0	0	1	0	0	0	0	0	0	0	0	0	0	0	0	0	0	0	0	1	0	1	1	0	0	0	0	0	0
CDR4_36	CPAR2_304370	CDR4	synonymous_variant	5806	1034344	p.Glu448Glu/c.1344A>G	0	0	1	0	0	1	0	0	0	0	1	0	1	1	0	0	0	1	1	0	1	0	1	0	0	0	0	0	0	0	0	0	0	0	0	0	0	0	1	0	0	0	0
CDR4_37	CPAR2_304370	CDR4	upstream_gene_variant	5806	1039018	c.-3331A>C	0	0	0	0	0	1	0	0	0	0	1	0	0	0	0	0	0	0	0	0	0	0	0	0	0	0	0	0	0	0	0	0	0	0	0	0	0	0	0	0	0	0	0
CDR4_38	CPAR2_304370	CDR4	synonymous_variant	5806	1034020	p.557/c.1665_1668delTCTTinsGCTA	0	0	0	0	0	0	0	0	0	0	0	0	0	0	0	0	0	0	0	0	0	0	0	0	0	0	0	0	0	0	0	0	0	0	0	0	0	0	0	0	0	0	0
CDR4_39	CPAR2_304370	CDR4	missense_variant	5806	1031650	p.Val1346Ala/c.4037_4038delTGinsCA	1	1	0	1	1	0	0	1	0	0	0	1	0	0	1	0	1	0	0	1	0	1	0	1	1	0	0	1	0	1	0	0	1	1	1	1	1	1	0	1	1	1	1
CDR4_40	CPAR2_304370	CDR4	frameshift_variant	5806	1033998	p.Phe563fs/c.1685_1686delTT	0	0	0	0	0	0	0	0	0	0	0	0	0	0	1	0	0	0	0	0	0	1	0	0	0	0	0	0	0	0	0	0	1	0	0	0	0	1	0	0	1	0	0
CDR4_41	CPAR2_304370	CDR4	missense_variant	5806	1034028	p.Ser554Ala/c.1650_1660delTAACGCGTTTTinsCAATGCATTTG	0	0	0	1	0	0	0	0	0	0	0	0	0	0	0	0	0	0	0	0	0	0	0	0	0	0	0	0	0	0	0	0	0	1	0	1	0	0	0	0	0	0	0
CDR4_42	CPAR2_304370	CDR4	missense_variant	5806	1033996	p.Asp564Glu/c.1689_1692delTGACinsCGAA	0	0	0	1	0	0	0	1	0	0	0	0	0	0	0	1	1	0	0	0	0	0	0	0	0	0	0	0	0	0	0	0	0	1	0	1	0	0	0	0	0	0	0
CDR4_43	CPAR2_304370	CDR4	missense_variant	5806	1031634	p.Met1352Leu/c.4050_4054delTACAAinsCACAT	1	1	0	0	1	0	1	1	0	0	0	1	0	0	1	0	1	0	0	1	0	1	0	1	1	0	0	1	0	1	0	0	1	1	1	1	1	1	0	1	1	0	1
CDR4_44	CPAR2_304370	CDR4	missense_variant	5806	1031715	p.HisValTyrAla1322TyrValTyrThr/c.3963_3973delTCATGTATACGinsCTACGTTTACA	1	1	0	0	0	0	1	1	0	0	0	1	0	0	0	0	1	0	0	1	0	1	0	1	1	0	1	1	0	1	0	0	1	1	1	1	1	1	0	1	1	0	1
CDR4_45	CPAR2_304370	CDR4	synonymous_variant	5806	1031707	p.1328/c.3978_3981delCACGinsTACA	1	1	0	0	0	0	0	1	0	0	0	1	0	0	0	0	1	0	0	1	0	1	0	1	1	0	1	1	0	1	0	0	1	1	1	1	1	1	0	1	1	0	1
CDR4_46	CPAR2_304370	CDR4	synonymous_variant	5806	1034074	p.Tyr538Tyr/c.1614C>T	0	0	0	1	0	0	0	0	0	0	1	0	0	0	0	0	0	0	0	0	0	0	0	0	0	0	0	0	0	0	0	0	0	1	0	1	0	0	0	0	0	0	0
ERG11_1	CPAR2_303740	ERG11	downstream_gene_variant	5806	866448	c.*2295T>C	0	0	0	0	0	0	0	0	0	0	0	0	1	0	0	0	0	0	0	0	0	0	0	0	0	0	0	0	0	0	0	0	0	0	0	0	0	0	0	0	0	0	0
ERG11_2	CPAR2_303740	ERG11	upstream_gene_variant	5806	871630	c.-1319A>G	0	0	0	0	0	0	0	0	1	1	0	0	0	0	0	0	0	0	0	0	1	0	0	0	0	0	0	0	0	0	0	0	0	0	0	0	0	0	1	0	0	1	0
ERG11_3	CPAR2_303740	ERG11	upstream_gene_variant	5806	870422	c.-111C>T	0	0	0	0	0	0	0	0	1	1	0	0	0	0	0	0	0	0	0	0	1	0	0	0	0	0	0	0	0	0	0	0	0	0	0	0	0	0	1	0	0	1	0
ERG11_4	CPAR2_303740	ERG11	missense_variant	5806	869119	p.Arg398Ile/c.1193G>T	0	0	0	0	0	0	0	0	1	1	0	0	0	0	0	0	0	0	0	0	1	0	0	0	0	0	0	0	0	0	0	0	0	0	0	0	0	0	1	0	0	1	0
ERG11_5	CPAR2_303740	ERG11	downstream_gene_variant	5806	865939	c.*2804G>T	0	0	0	1	0	0	0	0	0	0	0	0	0	0	0	1	0	1	1	0	0	0	1	0	0	0	0	0	0	0	0	0	0	0	0	0	0	0	0	0	0	0	0
ERG11_6	CPAR2_303740	ERG11	missense_variant	5806	869917	p.Phe132Tyr/c.395T>A	1	1	1	1	1	1	1	1	1	1	1	1	1	1	1	1	1	1	1	1	1	1	1	1	1	1	1	1	1	1	1	1	1	1	1	1	1	1	1	1	1	1	1
ERG11_7	CPAR2_303740	ERG11	upstream_gene_variant	5806	872932	c.-2621C>T	0	0	1	0	0	0	0	0	0	0	0	0	0	0	0	0	0	0	0	0	0	0	0	0	0	0	0	0	0	0	0	0	0	0	0	0	0	0	0	0	0	0	0
ERG11_8	CPAR2_303740	ERG11	downstream_gene_variant	5806	865906	c.*2837G>T	0	0	0	0	0	0	0	0	0	0	0	0	0	0	0	0	0	0	0	0	0	0	0	0	0	0	0	0	0	0	0	1	0	0	0	0	0	0	0	0	0	0	0
ERG11_9	CPAR2_303740	ERG11	upstream_gene_variant	5806	874186	c.-3875G>A	0	0	0	0	0	0	0	0	0	0	0	0	0	0	0	0	0	0	0	0	0	0	0	0	0	0	1	0	0	0	0	0	0	0	0	0	0	0	0	0	0	0	0
ERG11_10	CPAR2_303740	ERG11	upstream_gene_variant	5806	870356	c.-45C>A	0	0	0	0	0	0	0	0	0	0	0	0	0	0	0	0	0	0	0	0	0	0	0	0	0	0	1	0	0	0	0	0	0	0	0	0	0	0	0	0	0	0	0
ERG11_11	CPAR2_303740	ERG11	upstream_gene_variant	5806	873915	c.-3608T>C	0	0	0	0	0	0	0	0	0	1	0	0	0	0	0	0	0	0	0	0	0	0	0	0	0	0	0	0	0	0	0	0	0	0	0	0	0	0	0	0	0	0	0
ERG11_12	CPAR2_303740	ERG11	downstream_gene_variant	5806	865586	c.*3157T>C	0	0	1	0	0	0	0	0	0	0	0	0	0	0	0	0	0	0	0	0	0	0	0	0	0	0	0	0	0	0	0	0	0	0	0	0	0	0	0	0	0	0	0
ERG11_13	CPAR2_303740	ERG11	downstream_gene_variant	5806	866031	c.*2712G>T	0	0	0	0	0	0	0	0	0	0	0	0	0	1	0	0	0	0	0	0	0	0	0	0	0	0	0	0	0	0	0	0	0	0	0	0	0	0	0	0	0	0	0
ERG2_1	CPAR2_109890	ERG2	downstream_gene_variant	5569	2103678	c.*2372A>C	0	0	0	0	0	0	0	0	0	1	0	0	0	0	0	0	0	0	0	0	0	0	0	0	0	0	0	0	0	0	0	0	0	0	0	0	0	0	0	0	0	0	0
ERG2_2	CPAR2_109890	ERG2	downstream_gene_variant	5569	2101579	c.*277_*278delTT	0	0	0	0	0	0	0	0	0	0	0	0	0	0	0	0	0	0	0	0	0	0	0	0	0	0	0	0	0	0	0	0	1	0	0	0	0	0	0	0	0	0	0
ERG2_3	CPAR2_109890	ERG2	upstream_gene_variant	5569	2099745	c.-900_-894delCCCCCCC	0	0	0	0	0	0	0	0	0	0	0	0	0	0	0	0	0	0	0	0	1	0	0	0	0	0	0	0	0	0	0	0	0	0	0	0	0	0	0	0	0	0	0
ERG2_4	CPAR2_109890	ERG2	upstream_gene_variant	5569	2099424	c.-1229A>G	0	0	0	0	0	0	0	0	0	0	0	0	1	0	0	0	0	0	0	0	0	0	0	0	0	0	0	0	0	0	0	0	0	0	0	0	0	0	0	0	0	0	0
ERG2_5	CPAR2_109890	ERG2	upstream_gene_variant	5569	2096089	c.-4564G>C	0	0	0	0	0	0	0	0	0	0	0	0	1	1	0	0	0	0	0	0	0	0	0	0	0	0	0	0	0	0	0	0	0	0	0	0	0	0	0	0	0	0	0
ERG2_6	CPAR2_109890	ERG2	downstream_gene_variant	5569	2102654	c.*1348A>G	0	0	1	1	0	1	0	0	1	1	1	0	1	1	0	1	0	1	1	0	1	0	1	0	0	0	0	0	0	0	0	0	0	0	0	0	0	0	1	0	0	1	0
ERG2_7	CPAR2_109890	ERG2	upstream_gene_variant	5569	2097926	c.-2727G>T	0	0	0	0	0	0	0	0	0	0	0	0	0	0	1	0	0	0	0	0	0	1	0	0	0	0	0	0	0	0	0	0	1	0	0	0	0	1	0	0	1	0	0
ERG2_8	CPAR2_109890	ERG2	downstream_gene_variant	5569	2102441	c.*1135C>A	0	0	0	0	0	0	0	0	0	0	0	0	1	0	0	0	0	0	0	0	0	0	0	0	0	0	0	0	0	0	0	0	0	0	0	0	0	0	0	0	0	0	0
ERG2_9	CPAR2_109890	ERG2	downstream_gene_variant	5569	2103188	c.*1882G>T	0	0	0	0	0	0	0	0	0	0	0	0	0	1	0	0	0	0	0	0	0	0	0	0	0	0	0	0	0	0	0	0	0	0	0	0	0	0	0	0	0	0	0
ERG20_1	CPAR2_103950	ERG20	upstream_gene_variant	5569	884538	c.-2584C>T	0	0	0	0	0	0	0	0	0	0	0	0	0	0	0	0	0	0	0	0	0	0	0	0	0	0	0	0	0	0	0	0	1	0	0	0	0	0	0	0	0	0	0
ERG20_2	CPAR2_103950	ERG20	downstream_gene_variant	5569	878492	c.*2410C>T	0	0	0	0	0	0	0	0	0	0	0	0	1	0	0	0	0	0	0	0	0	0	0	0	0	0	0	0	0	0	0	0	0	0	0	0	0	0	0	0	0	0	0
ERG20_3	CPAR2_103950	ERG20	upstream_gene_variant	5569	883547	c.-1593C>T	0	0	0	0	0	0	0	0	0	1	0	0	0	0	0	0	0	0	0	0	0	0	0	0	0	0	0	0	0	0	0	0	0	0	0	0	0	0	0	0	0	0	0
ERG20_4	CPAR2_103950	ERG20	upstream_gene_variant	5569	883322	c.-1368A>G	0	0	0	1	0	1	0	0	1	1	1	0	1	1	0	1	0	1	1	0	1	0	1	0	0	0	0	0	0	0	0	0	0	0	0	0	0	0	1	0	0	1	0
ERG24_1	CPAR2_405900	ERG24	upstream_gene_variant	6372	1360895	c.-1760T>C	0	0	0	0	0	0	0	0	0	0	0	0	0	1	0	0	0	0	0	0	0	0	0	0	0	0	0	0	0	0	0	0	0	0	0	0	0	0	0	0	0	0	0
ERG24_2	CPAR2_405900	ERG24	upstream_gene_variant	6372	1360620	c.-2035G>A	0	0	0	0	0	0	0	0	0	0	0	0	0	0	0	0	0	0	1	0	0	0	0	0	0	0	0	0	0	0	0	0	0	0	0	0	0	0	0	0	0	0	0
ERG24_3	CPAR2_405900	ERG24	upstream_gene_variant	6372	1359650	c.-3005T>C	0	0	1	0	0	0	0	0	0	0	0	0	0	0	0	0	0	0	0	0	0	0	0	0	0	0	0	0	0	0	0	1	0	0	0	0	0	0	0	0	0	0	0
ERG24_4	CPAR2_405900	ERG24	downstream_gene_variant	6372	1364442	c.*462C>T	0	0	1	0	0	0	0	0	0	0	0	0	0	0	0	0	0	0	0	0	0	0	0	0	0	0	0	0	0	0	0	1	0	0	0	0	0	0	0	0	0	0	0
ERG24_5	CPAR2_405900	ERG24	downstream_gene_variant	6372	1367509	c.*3529A>G	0	0	0	0	0	0	0	0	0	0	0	0	0	1	0	0	0	0	0	0	0	0	0	0	0	0	0	0	0	0	0	0	0	0	0	0	0	0	0	0	0	0	0
ERG25_1	CPAR2_400970	ERG25	downstream_gene_variant	6372	209529	c.*2429T>C	0	0	0	0	0	0	0	0	0	0	0	0	0	0	0	0	0	0	0	0	0	0	0	0	0	0	0	0	1	0	0	0	0	0	0	0	0	0	0	0	0	0	0
ERG25_2	CPAR2_400970	ERG25	upstream_gene_variant	6372	201929	c.-4266G>A	0	0	1	0	0	0	0	0	0	0	0	0	0	0	0	0	0	0	0	0	0	0	0	0	0	0	0	0	0	0	0	1	0	0	0	0	0	0	0	0	0	0	0
ERG25_3	CPAR2_400970	ERG25	downstream_gene_variant	6372	208105	c.*1005G>A	0	0	0	0	0	0	0	0	0	0	0	0	0	0	0	0	0	0	0	0	0	0	0	0	0	0	0	0	0	0	0	0	0	0	0	0	0	0	0	0	0	0	0
ERG25_4	CPAR2_400970	ERG25	downstream_gene_variant	6372	209967	c.*2867G>A	0	0	0	0	0	1	0	0	0	0	1	0	0	0	0	0	0	0	0	0	0	0	0	0	0	0	0	0	0	0	0	0	0	0	0	0	0	0	0	0	0	0	0
ERG25_5	CPAR2_400970	ERG25	upstream_gene_variant	6372	201202	c.-4993G>A	0	0	0	0	0	0	0	0	0	0	0	0	1	0	0	0	0	0	0	0	0	0	0	0	0	0	0	0	0	0	0	0	0	0	0	0	0	0	0	0	0	0	0
ERG25_6	CPAR2_400970	ERG25	downstream_gene_variant	6372	210117	c.*3017C>A	0	0	0	0	0	0	0	0	0	0	0	0	0	0	1	0	0	0	0	0	0	1	0	0	0	0	0	0	0	0	0	0	1	0	0	0	0	1	0	0	1	0	0
ERG25_7	CPAR2_400970	ERG25	downstream_gene_variant	6372	209151	c.*2051G>A	0	0	0	0	0	0	0	0	1	1	0	0	0	0	0	0	0	0	0	0	1	0	0	0	0	0	0	0	0	0	0	0	0	0	0	0	0	0	1	0	0	1	0
ERG25_8	CPAR2_400970	ERG25	upstream_gene_variant	6372	204466	c.-1729G>A	0	0	0	0	0	0	0	0	0	0	0	0	1	0	0	0	0	0	0	0	0	0	0	0	0	0	0	0	0	0	0	0	0	0	0	0	0	0	0	0	0	0	0
ERG25_9	CPAR2_400970	ERG25	upstream_gene_variant	6372	205452	c.-743G>T	0	0	0	0	0	1	0	0	0	0	1	0	0	0	0	0	0	0	0	0	0	0	0	0	0	0	0	0	0	0	0	0	0	0	0	0	0	0	0	0	0	0	0
ERG26_1	CPAR2_302110	ERG26	missense_variant	5806	508606	p.Glu7Lys/c.19G>A	0	0	1	0	0	1	0	0	0	0	1	0	0	0	0	0	0	0	0	0	0	0	0	0	0	0	0	0	0	0	0	1	0	0	0	0	0	0	0	0	0	0	0
ERG26_2	CPAR2_302110	ERG26	synonymous_variant	5806	508752	p.Pro55Pro/c.165C>T	0	0	0	0	0	0	0	0	0	0	0	0	1	1	0	0	0	0	0	0	0	0	0	0	0	0	0	0	0	0	0	0	0	0	0	0	0	0	0	0	0	0	0
ERG26_3	CPAR2_302110	ERG26	missense_variant	5806	509092	p.Asn169Asp/c.505A>G	0	0	1	1	0	1	0	0	1	1	1	0	1	1	1	1	0	1	1	0	1	1	1	0	0	0	1	0	0	0	0	1	1	0	0	0	0	1	1	0	1	1	0
ERG26_4	CPAR2_302110	ERG26	missense_variant	5806	508786	p.Asp67Asn/c.199G>A	0	0	0	0	0	0	0	0	0	0	0	0	1	1	0	0	0	0	0	0	0	0	0	0	0	0	0	0	0	0	0	0	0	0	0	0	0	0	0	0	0	0	0
ERG26_5	CPAR2_302110	ERG26	downstream_gene_variant	5806	512217	c.*2574T>C	0	0	0	0	0	0	0	0	0	0	0	0	1	0	0	0	0	0	0	0	0	0	0	0	0	0	0	0	0	0	0	0	0	0	0	0	0	0	0	0	0	0	0
ERG26_6	CPAR2_302110	ERG26	synonymous_variant	5806	508908	p.Asn107Asn/c.321C>T	0	0	0	0	0	0	0	0	0	0	0	0	1	1	0	0	0	0	0	0	0	0	0	0	0	0	0	0	0	0	0	0	0	0	0	0	0	0	0	0	0	0	0
ERG26_7	CPAR2_302110	ERG26	missense_variant	5806	509097	p.Ala171Thr/c.510_511delCGinsTA	0	0	0	0	0	0	0	0	0	0	0	0	1	1	0	0	0	0	0	0	0	0	0	0	0	0	0	0	0	0	0	0	0	0	0	0	0	0	0	0	0	0	0
ERG26_8	CPAR2_302110	ERG26	downstream_gene_variant	5806	511780	c.*2140_*2141insA	0	0	0	0	0	0	0	0	0	0	0	0	1	0	0	0	0	0	0	0	0	0	0	0	0	0	0	0	0	0	0	0	0	0	0	0	0	0	0	0	0	0	0
ERG26_9	CPAR2_302110	ERG26	downstream_gene_variant	5806	511945	c.*2302A>T	0	0	0	0	0	0	0	0	0	0	0	0	1	0	0	0	0	0	0	0	0	0	0	0	0	0	0	0	0	0	0	0	0	0	0	0	0	0	0	0	0	0	0
ERG26_10	CPAR2_302110	ERG26	synonymous_variant	5806	508728	p.Leu47Leu/c.141A>G	0	0	0	0	0	0	0	0	0	0	0	0	1	1	0	0	0	0	0	0	0	0	0	0	0	0	0	0	0	0	0	0	0	0	0	0	0	0	0	0	0	0	0
ERG26_11	CPAR2_302110	ERG26	downstream_gene_variant	5806	511498	c.*1855G>A	0	0	0	0	0	1	0	0	0	0	1	0	0	0	0	0	0	0	0	0	0	0	0	0	0	0	0	0	0	0	0	0	0	0	0	0	0	0	0	0	0	0	0
ERG26_12	CPAR2_302110	ERG26	downstream_gene_variant	5806	512014	c.*2371T>A	0	0	0	0	0	0	0	0	0	0	0	0	1	0	0	0	0	0	0	0	0	0	0	0	0	0	0	0	0	0	0	0	0	0	0	0	0	0	0	0	0	0	0
ERG26_13	CPAR2_302110	ERG26	downstream_gene_variant	5806	512789	c.*3146A>G	0	0	0	0	0	0	0	0	0	0	0	0	0	0	0	0	0	0	0	0	0	1	0	1	0	0	0	0	0	0	0	0	0	1	1	0	0	0	0	0	0	0	0
ERG26_14	CPAR2_302110	ERG26	downstream_gene_variant	5806	512269	c.*2626C>G	0	0	0	0	0	0	0	0	1	1	0	0	1	0	0	0	0	0	0	0	1	0	0	0	0	0	1	0	0	0	0	0	0	0	0	0	0	0	1	0	0	1	0
ERG26_15	CPAR2_302110	ERG26	upstream_gene_variant	5806	508283	c.-305G>A	0	0	0	0	0	0	0	0	0	0	0	0	1	1	0	0	0	0	0	0	0	0	0	0	0	0	0	0	0	0	0	0	0	0	0	0	0	0	0	0	0	0	0
ERG26_16	CPAR2_302110	ERG26	downstream_gene_variant	5806	513932	c.*4289T>C	0	0	0	0	0	0	0	0	0	0	0	0	0	0	0	0	0	0	0	0	1	0	0	0	0	0	0	0	0	0	0	0	0	0	0	0	0	0	1	0	0	1	0
ERG26_17	CPAR2_302110	ERG26	upstream_gene_variant	5806	507581	c.-1007C>T	0	0	1	0	0	1	0	0	0	0	1	0	1	0	0	0	0	0	0	0	0	0	0	0	0	0	0	0	0	0	0	0	0	0	0	0	0	0	0	0	0	0	0
ERG26_18	CPAR2_302110	ERG26	downstream_gene_variant	5806	513940	c.*4297A>G	0	0	0	0	0	1	0	0	0	0	1	0	0	0	0	0	0	0	0	0	1	0	0	0	0	0	0	0	0	0	0	0	0	0	0	0	0	0	1	0	0	1	0
ERG26_19	CPAR2_302110	ERG26	upstream_gene_variant	5806	503914	c.-4674C>T	0	0	0	0	0	0	0	0	0	0	0	0	0	0	1	0	0	0	0	0	0	1	0	0	0	0	0	0	0	0	0	0	1	0	0	0	0	1	0	0	1	0	0
ERG26_20	CPAR2_302110	ERG26	upstream_gene_variant	5806	503946	c.-4642T>C	0	0	0	0	0	0	0	0	0	0	0	0	0	0	1	0	0	0	0	0	0	1	0	0	0	0	0	0	0	0	0	0	1	0	0	0	0	1	0	0	1	0	0
ERG26_21	CPAR2_302110	ERG26	upstream_gene_variant	5806	504033	c.-4555A>G	0	0	0	0	0	0	0	0	0	0	0	0	0	0	1	0	0	0	0	0	0	1	0	0	0	0	0	0	0	0	0	0	1	0	0	0	0	1	0	0	1	0	0
ERG26_22	CPAR2_302110	ERG26	upstream_gene_variant	5806	504047	c.-4541A>G	0	0	0	0	0	0	0	0	0	0	0	0	0	0	1	0	0	0	0	0	0	1	0	0	0	0	0	0	0	0	0	0	1	0	0	0	0	1	0	0	1	0	0
ERG26_23	CPAR2_302110	ERG26	upstream_gene_variant	5806	504386	c.-4202T>A	0	0	0	0	0	0	0	0	0	0	0	0	0	0	1	0	0	0	0	0	0	1	0	0	0	0	0	0	0	0	0	0	1	0	0	0	0	1	0	0	1	0	0
ERG26_24	CPAR2_302110	ERG26	upstream_gene_variant	5806	504397	c.-4191A>G	0	0	0	0	0	0	0	0	0	0	0	0	0	0	1	0	0	0	0	0	0	1	0	0	0	0	0	0	0	0	0	0	1	0	0	0	0	1	0	0	1	0	0
ERG26_25	CPAR2_302110	ERG26	upstream_gene_variant	5806	504516	c.-4072T>C	0	0	0	0	0	0	0	0	0	0	0	0	0	0	1	0	0	0	0	0	0	1	0	0	0	0	0	0	0	0	0	0	1	0	0	0	0	1	0	0	1	0	0
ERG26_26	CPAR2_302110	ERG26	downstream_gene_variant	5806	514280	c.*4637A>G	0	0	0	0	0	0	0	0	0	0	0	0	0	0	0	0	0	0	0	0	0	0	0	0	0	0	0	0	0	0	0	0	0	0	0	0	0	0	0	0	0	0	0
ERG26_27	CPAR2_302110	ERG26	upstream_gene_variant	5806	504561	c.-4027C>T	0	0	0	0	0	0	0	0	0	0	0	0	0	0	1	0	0	0	0	0	0	1	0	0	0	0	0	0	0	0	0	0	1	0	0	0	0	1	0	0	1	0	0
ERG26_28	CPAR2_302110	ERG26	upstream_gene_variant	5806	505736	c.-2852A>T	0	0	0	0	0	0	0	0	0	0	0	0	0	0	1	0	0	0	0	0	0	1	0	0	0	0	0	0	0	0	0	0	1	0	0	0	0	1	0	0	1	0	0
ERG26_29	CPAR2_302110	ERG26	synonymous_variant	5806	508716	p.Leu43Leu/c.129G>A	0	0	0	0	0	0	0	0	0	0	0	0	1	1	0	0	0	0	0	0	0	0	0	0	0	0	0	0	0	0	0	0	0	0	0	0	0	0	0	0	0	0	0
ERG26_30	CPAR2_302110	ERG26	downstream_gene_variant	5806	511490	c.*1847C>T	0	0	0	0	0	1	0	0	0	0	1	0	0	0	0	0	0	0	0	0	0	0	0	0	0	0	0	0	0	0	0	0	0	0	0	0	0	0	0	0	0	0	0
ERG26_31	CPAR2_302110	ERG26	downstream_gene_variant	5806	512495	c.*2852T>G	0	0	0	0	0	0	0	0	0	0	0	0	0	0	0	0	0	0	0	0	1	0	0	0	0	0	0	0	0	0	0	0	0	0	0	0	0	0	1	0	0	1	0
ERG26_32	CPAR2_302110	ERG26	downstream_gene_variant	5806	511473	c.*1830C>T	0	0	0	0	0	1	0	0	0	0	1	0	0	0	0	0	0	0	0	0	0	0	0	0	0	0	0	0	0	0	0	0	0	0	0	0	0	0	0	0	0	0	0
ERG26_33	CPAR2_302110	ERG26	downstream_gene_variant	5806	511248	c.*1605A>G	0	0	0	0	0	1	0	0	0	0	1	0	0	0	0	0	0	0	0	0	0	0	0	0	0	0	0	0	0	0	0	0	0	0	0	0	0	0	0	0	0	0	0
ERG26_34	CPAR2_302110	ERG26	downstream_gene_variant	5806	512202	c.*2559A>G	0	0	0	1	0	0	0	0	1	1	0	0	1	0	0	1	0	1	1	0	1	0	1	0	0	0	1	0	0	0	0	0	0	0	0	0	0	0	1	0	0	1	0
ERG26_35	CPAR2_302110	ERG26	upstream_gene_variant	5806	505552	c.-3036T>C	0	0	0	1	0	0	0	0	0	0	0	0	0	0	1	1	0	1	1	0	0	1	1	0	0	0	0	0	0	0	0	0	1	0	0	0	0	1	0	0	1	0	0
ERG26_36	CPAR2_302110	ERG26	downstream_gene_variant	5806	511097	c.*1454A>G	0	0	0	0	0	1	0	0	0	0	1	0	0	0	0	0	0	0	0	0	0	0	0	0	0	0	0	0	0	0	0	0	0	0	0	0	0	0	0	0	0	0	0
ERG26_37	CPAR2_302110	ERG26	downstream_gene_variant	5806	510768	c.*1125G>A	0	0	0	0	0	1	0	0	0	0	1	0	0	0	0	0	0	0	0	0	0	0	0	0	0	0	0	0	0	0	0	0	0	0	0	0	0	0	0	0	0	0	0
ERG26_38	CPAR2_302110	ERG26	downstream_gene_variant	5806	513349	c.*3706T>C	0	0	0	0	0	0	0	0	0	0	1	0	0	0	0	0	0	0	0	0	0	0	0	0	0	0	0	0	0	0	0	0	0	0	0	0	0	0	0	0	0	1	0
ERG26_39	CPAR2_302110	ERG26	downstream_gene_variant	5806	510642	c.*999C>T	0	0	0	0	0	1	0	0	0	0	1	0	0	0	0	0	0	0	0	0	0	0	0	0	0	0	0	0	0	0	0	0	0	0	0	0	0	0	0	0	0	0	0
ERG26_40	CPAR2_302110	ERG26	downstream_gene_variant	5806	511282	c.*1639_*1643delTATATinsCATAA	0	0	0	0	0	1	0	0	0	0	1	0	0	0	0	0	0	0	0	0	0	0	0	0	0	0	0	0	0	0	0	0	0	0	0	0	0	0	0	0	0	0	0
ERG26_41	CPAR2_302110	ERG26	downstream_gene_variant	5806	510007	c.*364A>G	0	0	0	0	0	1	0	0	0	0	1	0	0	0	0	0	0	0	0	0	0	0	0	0	0	0	0	0	0	0	0	0	0	0	0	0	0	0	0	0	0	0	0
ERG26_42	CPAR2_302110	ERG26	downstream_gene_variant	5806	511332	c.*1689G>A	0	0	0	0	0	1	0	0	0	0	1	0	0	0	0	0	0	0	0	0	0	0	0	0	0	0	0	0	0	0	0	0	0	0	0	0	0	0	0	0	0	0	0
ERG26_43	CPAR2_302110	ERG26	missense_variant	5806	508742	p.Thr52Ile/c.155C>T	0	0	0	0	0	0	0	0	0	0	0	0	0	0	0	0	0	0	0	0	0	0	0	0	0	0	0	0	0	0	0	0	0	0	0	0	0	0	0	0	1	0	0
ERG26_44	CPAR2_302110	ERG26	downstream_gene_variant	5806	512647	c.*3004A>G	0	1	0	0	0	0	0	0	0	0	0	0	0	0	0	0	1	0	0	0	0	0	0	1	1	0	0	0	0	0	0	0	0	1	0	0	1	1	0	1	1	0	0
ERG26_45	CPAR2_302110	ERG26	downstream_gene_variant	5806	511254	c.*1618delA	0	0	0	0	0	1	0	0	0	0	1	0	0	0	0	0	0	0	0	0	0	0	0	0	0	0	0	0	0	0	0	0	0	0	0	0	0	0	0	0	0	0	0
ERG26_46	CPAR2_302110	ERG26	downstream_gene_variant	5806	509837	c.*194G>A	0	0	0	0	0	1	0	0	0	0	1	0	0	0	0	0	0	0	0	0	0	0	0	0	0	0	0	0	0	0	0	0	0	0	0	0	0	0	0	0	0	0	0
ERG26_47	CPAR2_302110	ERG26	downstream_gene_variant	5806	511454	c.*1811_*1815delCAACTinsTAACG	0	0	0	0	0	1	0	0	0	0	1	0	0	0	0	0	0	0	0	0	0	0	0	0	0	0	0	0	0	0	0	0	0	0	0	0	0	0	0	0	0	0	0
ERG26_48	CPAR2_302110	ERG26	downstream_gene_variant	5806	512575	c.*2932C>T	1	1	0	1	0	0	0	1	0	0	0	0	0	0	0	0	1	0	0	0	0	1	0	1	1	1	0	1	0	0	0	0	1	1	1	1	1	1	0	1	1	0	0
ERG26_49	CPAR2_302110	ERG26	downstream_gene_variant	5806	512809	c.*3166G>A	0	0	0	0	0	0	0	0	0	0	0	0	0	0	0	0	0	0	0	0	0	0	0	0	0	0	0	0	0	0	0	0	0	0	0	0	0	0	0	0	0	0	0
ERG26_50	CPAR2_302110	ERG26	upstream_gene_variant	5806	506051	c.-2537T>G	0	0	1	0	0	0	0	0	0	0	0	0	0	0	1	0	0	0	0	0	0	1	0	0	0	0	0	0	0	0	0	1	1	0	0	0	0	1	0	0	1	0	0
ERG26_51	CPAR2_302110	ERG26	upstream_gene_variant	5806	505073	c.-3515T>C	0	0	0	0	0	0	0	0	0	0	0	0	0	0	0	0	0	0	0	0	0	1	0	0	0	0	0	0	0	0	0	0	1	0	0	0	0	0	0	0	0	0	0
ERG26_52	CPAR2_302110	ERG26	downstream_gene_variant	5806	511465	c.*1822A>G	0	0	0	0	0	1	0	0	0	0	1	0	0	0	0	0	0	0	0	0	0	0	0	0	0	0	0	0	0	0	0	0	0	0	0	0	0	0	0	0	0	0	0
ERG26_53	CPAR2_302110	ERG26	downstream_gene_variant	5806	512842	c.*3199G>A	0	0	0	0	0	0	0	0	0	0	0	0	0	0	0	0	0	0	0	0	0	0	0	0	0	0	0	0	0	0	0	0	0	0	0	0	0	0	0	0	0	0	0
ERG26_54	CPAR2_302110	ERG26	downstream_gene_variant	5806	511267	c.*1624_*1625delCGinsAT	0	0	0	0	0	1	0	0	0	0	1	0	0	0	0	0	0	0	0	0	0	0	0	0	0	0	0	0	0	0	0	0	0	0	0	0	0	0	0	0	0	0	0
ERG26_55	CPAR2_302110	ERG26	downstream_gene_variant	5806	509658	c.*15T>C	0	0	0	0	0	1	0	0	0	0	1	0	0	0	0	0	0	0	0	0	0	0	0	0	0	0	0	0	0	0	0	0	0	0	0	0	0	0	0	0	0	0	0
ERG26_56	CPAR2_302110	ERG26	downstream_gene_variant	5806	509723	c.*80T>C	0	0	0	0	0	1	0	0	0	0	1	0	0	0	0	0	0	0	0	0	0	0	0	0	0	0	0	0	0	0	0	0	0	0	0	0	0	0	0	0	0	0	0
ERG26_57	CPAR2_302110	ERG26	upstream_gene_variant	5806	505085	c.-3503G>A	0	0	0	0	0	0	0	0	0	0	0	0	0	0	0	0	0	0	0	0	0	1	0	0	0	0	0	0	0	0	0	0	1	0	0	0	0	0	0	0	1	0	0
ERG27_1	CPAR2_801560	ERG27	upstream_gene_variant	5807	360499	c.-271G>A	0	0	0	0	0	0	1	0	0	0	0	0	0	0	0	0	0	0	0	0	0	0	0	0	0	0	0	0	0	0	0	0	0	0	0	0	0	0	0	0	0	0	0
ERG27_2	CPAR2_801560	ERG27	downstream_gene_variant	5807	357658	c.*1533T>C	0	0	0	0	0	0	0	0	1	1	0	0	0	0	0	0	0	0	0	0	1	0	0	0	0	0	0	0	0	0	0	0	0	0	0	0	0	0	1	0	0	1	0
ERG27_3	CPAR2_801560	ERG27	missense_variant	5807	359957	p.Tyr91Cys/c.272A>G	0	0	0	0	0	0	0	0	0	1	0	0	0	0	0	0	0	0	0	0	0	0	0	0	0	0	0	0	0	0	0	0	0	0	0	0	0	0	0	0	0	0	0
ERG27_4	CPAR2_801560	ERG27	downstream_gene_variant	5807	354456	c.*4735C>A	0	0	0	0	0	0	1	0	0	0	0	0	0	0	0	0	0	0	0	0	0	0	0	0	0	0	0	0	0	0	0	0	0	0	0	0	0	0	0	0	0	0	0
ERG27_5	CPAR2_801560	ERG27	upstream_gene_variant	5807	364858	c.-4630C>T	0	0	0	0	0	0	0	0	0	0	0	0	0	0	0	0	0	0	0	0	0	0	0	0	0	0	0	0	0	0	0	0	0	0	0	0	0	0	0	0	0	1	0
ERG28_1	CPAR2_213750	ERG28	downstream_gene_variant	5809	2927737	c.*3516C>G	0	0	0	0	0	1	0	0	0	0	1	0	0	0	0	0	0	0	0	0	0	0	0	0	0	0	0	0	0	0	0	0	0	0	0	0	0	0	0	0	0	0	0
ERG28_2	CPAR2_213750	ERG28	downstream_gene_variant	5809	2930875	c.*370_*371delAA	0	0	0	0	0	0	0	0	0	0	0	0	0	0	0	0	0	0	0	0	0	0	0	0	0	0	0	0	0	0	0	0	0	0	0	0	0	0	0	0	0	0	0
ERG28_3	CPAR2_213750	ERG28	downstream_gene_variant	5809	2930812	c.*441A>T	0	0	1	1	0	1	1	0	1	1	1	0	1	1	1	1	0	0	1	0	1	1	1	0	0	0	1	0	0	0	0	1	1	0	0	0	0	1	1	0	1	1	0
ERG28_4	CPAR2_213750	ERG28	downstream_gene_variant	5809	2928554	c.*2691_*2692delTT	0	0	0	0	0	0	0	0	1	1	0	0	0	0	0	0	0	0	0	0	1	0	0	0	0	0	0	0	0	0	0	0	0	0	0	0	0	0	1	0	0	1	0
ERG28_5	CPAR2_213750	ERG28	downstream_gene_variant	5809	2928276	c.*2977A>G	0	0	0	0	0	0	0	0	0	0	0	0	0	0	0	0	0	0	0	0	0	0	0	0	0	0	0	0	0	0	0	0	0	0	0	0	0	0	1	0	0	1	0
ERG28_6	CPAR2_213750	ERG28	downstream_gene_variant	5809	2930611	c.*642C>T	0	0	0	0	0	0	0	0	0	0	0	0	1	0	0	1	0	1	1	0	0	0	1	0	0	0	0	0	0	0	0	0	0	0	0	0	0	0	0	0	0	0	0
ERG28_7	CPAR2_213750	ERG28	downstream_gene_variant	5809	2930141	c.*1112A>G	0	0	0	0	0	0	0	0	0	0	0	0	0	0	0	0	0	0	0	0	0	0	0	0	0	0	0	0	0	0	0	0	0	0	0	0	0	0	0	0	0	0	0
ERG28_8	CPAR2_213750	ERG28	downstream_gene_variant	5809	2930335	c.*918C>T	0	0	1	1	0	1	0	0	1	1	1	0	1	1	0	1	0	1	1	0	1	0	1	0	0	0	0	0	0	0	0	1	0	0	0	0	0	0	1	0	0	1	0
ERG28_9	CPAR2_213750	ERG28	downstream_gene_variant	5809	2928968	c.*2285A>G	0	0	0	0	0	0	0	0	0	0	0	0	1	0	0	0	0	0	0	0	0	0	0	0	0	0	0	0	0	0	0	0	0	0	0	0	0	0	0	0	0	0	0
ERG28_10	CPAR2_213750	ERG28	upstream_gene_variant	5809	2932761	c.-1098A>G	0	0	0	1	0	0	0	0	0	0	0	0	0	0	0	1	0	1	1	0	0	0	1	0	0	0	0	0	0	0	0	0	0	0	0	0	0	0	0	0	0	0	0
ERG28_11	CPAR2_213750	ERG28	downstream_gene_variant	5809	2928862	c.*2391C>G	0	0	1	1	0	1	0	0	1	1	1	0	1	1	0	1	0	1	1	0	1	0	1	0	0	0	0	0	0	0	0	1	0	0	0	0	0	0	1	0	0	1	0
ERG28_12	CPAR2_213750	ERG28	upstream_gene_variant	5809	2935220	c.-3557A>G	0	0	0	0	0	0	0	0	0	0	0	0	0	0	0	0	0	0	0	0	0	0	0	0	0	0	0	0	0	0	0	0	0	0	0	0	0	0	0	0	0	0	0
ERG28_13	CPAR2_213750	ERG28	downstream_gene_variant	5809	2930660	c.*593G>T	0	0	0	0	0	0	0	0	0	0	0	0	0	0	1	0	0	0	0	0	0	1	0	0	0	0	0	0	0	0	0	0	1	0	0	0	0	1	0	0	1	0	0
ERG28_14	CPAR2_213750	ERG28	upstream_gene_variant	5809	2933564	c.-1901G>A	0	0	0	0	0	0	0	0	0	0	0	0	0	0	0	0	0	0	0	0	0	0	0	0	0	0	1	0	0	0	0	0	0	0	0	0	0	0	0	0	0	0	0
ERG28_15	CPAR2_213750	ERG28	upstream_gene_variant	5809	2933878	c.-2215T>C	0	0	0	0	0	0	0	0	0	0	0	0	0	0	0	0	0	0	0	0	0	0	0	0	0	0	0	0	0	0	0	0	0	0	0	0	0	0	0	0	0	0	0
ERG28_16	CPAR2_213750	ERG28	upstream_gene_variant	5809	2932095	c.-432G>A	0	0	0	1	0	0	0	0	0	0	0	0	0	0	0	0	0	0	0	0	0	0	0	0	0	0	0	0	0	0	0	0	0	0	0	0	0	0	0	0	0	0	0
ERG29_1	CPAR2_302020	ERG29	downstream_gene_variant	5806	487344	c.*686A>G	0	0	1	1	0	1	0	0	0	0	1	0	0	0	0	1	0	1	1	0	1	0	1	0	0	0	0	0	0	0	0	1	0	0	0	0	0	0	0	0	0	0	0
ERG29_2	CPAR2_302020	ERG29	downstream_gene_variant	5806	484840	c.*3190C>T	0	0	1	1	0	1	0	0	1	1	1	0	1	1	1	1	0	1	1	0	1	1	1	0	0	0	0	0	0	0	0	0	1	0	0	0	0	1	1	0	1	1	0
ERG29_3	CPAR2_302020	ERG29	downstream_gene_variant	5806	483220	c.*4810A>T	0	0	0	0	0	0	0	0	0	0	0	0	0	0	0	0	0	1	0	0	0	0	0	0	0	0	0	0	0	0	0	0	0	0	0	0	0	0	0	0	0	0	0
ERG29_4	CPAR2_302020	ERG29	upstream_gene_variant	5806	489072	c.-377C>G	0	0	0	1	0	0	0	0	0	0	0	0	0	0	0	1	0	1	1	0	0	0	1	0	0	0	0	0	0	0	0	0	0	0	0	0	0	0	0	0	0	0	0
ERG29_5	CPAR2_302020	ERG29	upstream_gene_variant	5806	490931	c.-2236G>A	0	0	0	1	0	0	0	0	1	1	0	0	0	0	0	1	0	1	1	0	1	0	1	0	0	0	0	0	0	0	0	0	0	0	0	0	0	0	1	0	0	1	0
ERG29_6	CPAR2_302020	ERG29	downstream_gene_variant	5806	483458	c.*4572T>A	0	0	0	0	0	0	0	0	0	0	0	0	0	0	0	0	0	0	0	0	0	0	0	1	0	0	0	0	0	0	0	0	0	1	1	0	1	0	0	0	0	0	0
ERG29_7	CPAR2_302020	ERG29	downstream_gene_variant	5806	487146	c.*884C>A	0	0	0	0	0	0	0	0	0	0	0	0	1	0	0	0	0	0	0	0	0	0	0	0	0	0	0	0	0	0	0	0	0	0	0	0	0	0	0	0	0	0	0
ERG29_8	CPAR2_302020	ERG29	upstream_gene_variant	5806	491048	c.-2353C>A	0	0	0	0	0	0	0	0	0	0	0	0	0	0	0	0	0	0	0	0	0	0	0	0	0	0	0	0	0	0	0	0	0	0	0	0	0	0	0	0	0	0	0
ERG29_9	CPAR2_302020	ERG29	upstream_gene_variant	5806	491037	c.-2342A>G	0	0	0	0	0	0	0	0	0	0	0	0	0	0	0	0	0	0	0	0	0	0	0	0	0	0	0	0	0	0	0	0	0	0	0	0	0	0	0	0	0	0	0
ERG29_10	CPAR2_302020	ERG29	downstream_gene_variant	5806	486050	c.*1980C>A	0	0	0	0	0	0	0	0	0	0	0	0	1	0	0	0	0	0	0	0	0	0	0	0	0	0	0	0	0	0	0	0	0	0	0	0	0	0	0	0	0	0	0
ERG29_11	CPAR2_302020	ERG29	missense_variant	5806	488317	p.Arg127Gly/c.379A>G	0	0	0	0	0	0	0	0	0	0	0	0	0	0	1	0	0	0	0	0	0	0	0	0	0	0	0	0	0	0	0	0	0	0	0	0	0	0	0	0	0	0	0
ERG3_1	CPAR2_105550	ERG3	upstream_gene_variant	5569	1212871	c.-4902G>A	0	0	0	0	0	0	0	0	0	0	0	0	0	0	0	1	0	1	0	0	0	0	1	0	0	0	0	0	0	0	0	0	0	0	0	0	0	0	0	0	0	0	0
ERG3_2	CPAR2_105550	ERG3	upstream_gene_variant	5569	1211189	c.-3220T>A	0	0	0	1	0	0	0	0	0	0	0	0	0	0	0	1	0	1	1	0	0	0	1	0	0	0	0	0	0	0	0	0	0	0	0	0	0	0	0	0	0	0	0
ERG3_3	CPAR2_105550	ERG3	synonymous_variant	5569	1207145	p.His275His/c.825C>T	0	0	0	0	0	1	0	0	0	0	1	0	0	0	0	0	0	0	0	0	0	0	0	0	0	0	0	0	0	0	0	0	0	0	0	0	0	0	0	0	0	0	0
ERG3_4	CPAR2_105550	ERG3	upstream_gene_variant	5569	1209325	c.-1356C>A	0	0	0	0	0	0	0	0	1	0	0	0	0	0	0	0	0	0	0	0	0	0	0	0	0	0	0	0	0	0	0	0	0	0	0	0	0	0	0	0	0	0	0
ERG3_5	CPAR2_105550	ERG3	upstream_gene_variant	5569	1212057	c.-4089_-4088delCCinsTT	0	0	0	0	0	0	0	0	0	0	0	0	0	0	1	0	0	0	0	0	0	1	0	0	0	0	0	0	0	0	0	0	1	0	0	0	0	1	0	0	1	0	0
ERG3_6	CPAR2_105550	ERG3	downstream_gene_variant	5569	1206144	c.*603delT	0	0	0	0	0	0	0	0	0	0	0	0	0	1	0	0	0	0	0	0	0	0	0	0	0	0	0	0	0	0	0	0	0	0	0	0	0	0	0	0	0	0	0
ERG3_7	CPAR2_105550	ERG3	downstream_gene_variant	5569	1204285	c.*2467G>A	0	0	1	0	0	0	0	0	0	0	0	0	0	0	0	0	0	0	0	0	0	0	0	0	0	0	0	0	0	0	0	0	0	0	0	0	0	0	0	0	0	0	0
ERG5_1	CPAR2_703970	ERG5	downstream_gene_variant	6110	867903	c.*3165T>A	0	0	1	0	0	1	0	0	0	0	1	0	1	1	0	0	0	0	0	0	0	0	0	0	0	0	0	0	0	0	0	1	0	0	0	0	0	0	0	0	0	0	0
ERG5_2	CPAR2_703970	ERG5	upstream_gene_variant	6110	858399	c.-4768delG	0	0	0	0	0	0	0	0	0	0	0	0	0	0	0	0	0	0	0	0	0	0	0	0	0	0	0	0	0	0	0	0	0	0	0	0	0	0	0	0	0	0	0
ERG5_3	CPAR2_703970	ERG5	downstream_gene_variant	6110	864801	c.*63G>A	0	0	0	0	0	0	0	0	0	0	0	0	0	0	0	0	0	0	0	0	0	0	0	0	0	0	0	0	0	0	0	0	0	0	0	0	0	0	0	0	0	0	0
ERG5_4	CPAR2_703970	ERG5	downstream_gene_variant	6110	865308	c.*570G>T	0	0	0	0	0	0	0	0	0	0	0	0	0	0	0	0	0	0	0	0	0	0	0	0	0	0	0	0	0	0	0	0	0	0	0	0	0	0	0	0	0	0	0
ERG5_5	CPAR2_703970	ERG5	upstream_gene_variant	6110	861603	c.-1567G>T	0	0	0	0	0	0	0	0	0	0	0	0	1	0	0	0	0	0	0	0	0	0	0	0	0	0	0	0	0	0	0	0	0	0	0	0	0	0	0	0	0	0	0
ERG5_6	CPAR2_703970	ERG5	downstream_gene_variant	6110	867494	c.*2756A>G	0	0	0	0	0	0	0	0	0	0	0	0	1	0	0	0	0	0	0	0	0	0	0	0	0	0	0	0	0	0	0	0	0	0	0	0	0	0	0	0	0	0	0
ERG5_7	CPAR2_703970	ERG5	upstream_gene_variant	6110	858658	c.-4512A>G	0	0	0	0	0	1	0	0	0	0	1	0	0	0	0	0	0	0	0	0	0	0	0	0	0	0	0	0	0	0	0	0	0	0	0	0	0	0	0	0	0	0	0
ERG5_8	CPAR2_703970	ERG5	downstream_gene_variant	6110	865737	c.*999T>A	0	0	0	1	0	0	0	0	0	0	0	0	0	0	0	0	0	0	1	0	0	0	0	0	0	0	0	0	0	0	0	0	0	0	0	0	0	0	0	0	0	0	0
ERG5_9	CPAR2_703970	ERG5	downstream_gene_variant	6110	864938	c.*200_*201delGGinsAA	0	0	1	0	0	0	0	0	0	0	0	0	0	0	0	0	0	0	0	0	0	0	0	0	0	0	0	0	0	0	0	1	0	0	0	0	0	0	0	0	0	0	0
ERG5_10	CPAR2_703970	ERG5	downstream_gene_variant	6110	867944	c.*3206G>A	0	0	0	0	0	0	0	0	0	0	0	0	1	0	0	0	0	0	0	0	0	0	0	0	0	0	0	0	0	0	0	0	0	0	0	0	0	0	0	0	0	0	0
ERG5_11	CPAR2_703970	ERG5	downstream_gene_variant	6110	865959	c.*1221C>G	0	0	1	0	0	0	0	0	0	0	0	0	0	0	0	0	0	0	0	0	0	0	0	0	0	0	0	0	0	0	0	1	0	0	0	0	0	0	0	0	0	0	0
ERG5_12	CPAR2_703970	ERG5	upstream_gene_variant	6110	863056	c.-114C>T	0	0	0	0	0	0	0	0	0	0	0	0	0	0	0	0	0	0	0	0	0	0	0	0	0	0	0	0	0	0	0	0	0	0	0	0	0	0	0	0	0	0	0
ERG5_13	CPAR2_703970	ERG5	downstream_gene_variant	6110	867845	c.*3107C>T	0	0	1	0	0	0	0	0	0	0	0	0	0	0	0	0	0	0	0	0	0	0	0	0	0	0	0	0	0	0	0	1	0	0	0	0	0	0	0	0	0	0	0
ERG6_1	CPAR2_405010	ERG6	upstream_gene_variant	6372	1131086	c.-4874T>G	0	0	0	0	0	0	0	0	0	0	0	0	0	0	0	0	0	0	0	0	0	0	0	1	0	0	0	0	0	0	0	0	0	0	0	0	0	0	0	1	0	0	0
ERG6_2	CPAR2_405010	ERG6	missense_variant	6372	1125591	p.Ser208Gly/c.622A>G	0	0	1	1	0	1	0	0	1	1	1	0	1	1	1	1	0	1	1	0	1	1	1	0	0	0	0	0	0	0	0	1	1	0	0	0	0	1	1	0	1	1	0
ERG6_3	CPAR2_405010	ERG6	upstream_gene_variant	6372	1130282	c.-4070G>A	0	0	0	0	0	0	0	0	0	0	0	0	0	1	0	0	0	0	0	0	0	0	0	0	0	0	0	0	0	0	0	0	0	0	0	0	0	0	0	0	0	0	0
ERG6_4	CPAR2_405010	ERG6	downstream_gene_variant	6372	1121787	c.*3295T>C	0	0	0	0	0	0	0	0	0	0	0	0	1	0	0	0	0	0	0	0	0	0	0	0	0	0	0	0	0	0	0	0	0	0	0	0	0	0	0	0	0	0	0
ERG6_5	CPAR2_405010	ERG6	downstream_gene_variant	6372	1121093	c.*3979delA	0	0	0	0	0	0	0	0	1	0	0	0	0	0	0	0	0	0	0	0	1	0	0	0	0	0	0	0	0	0	0	0	0	0	0	0	0	0	1	0	0	1	0
ERG6_6	CPAR2_405010	ERG6	downstream_gene_variant	6372	1123558	c.*1524G>A	0	0	0	0	0	0	0	0	0	0	0	0	0	0	0	0	0	0	0	0	1	0	0	0	0	0	0	0	0	0	0	0	0	0	0	0	0	0	0	0	0	0	0
ERG6_7	CPAR2_405010	ERG6	upstream_gene_variant	6372	1126792	c.-591_-590insA	0	0	0	0	0	0	0	0	0	0	0	0	0	0	0	0	0	0	0	0	0	0	0	0	0	0	0	0	0	0	0	0	0	0	0	0	0	0	0	0	0	1	0
ERG6_8	CPAR2_405010	ERG6	downstream_gene_variant	6372	1124173	c.*909G>A	0	0	0	0	0	0	0	0	0	0	0	0	0	0	0	0	0	0	0	0	0	0	0	0	0	0	0	0	0	0	0	1	0	0	0	0	0	0	0	0	0	0	0
ERG6_9	CPAR2_405010	ERG6	missense_variant	6372	1125554	p.Gly220Asn/c.658_659delGGinsAA	0	0	1	0	0	0	0	0	0	0	0	0	0	0	0	0	0	0	0	0	0	0	0	0	0	0	0	0	0	0	0	0	0	0	0	0	0	0	0	0	0	0	0
ERG6_10	CPAR2_405010	ERG6	downstream_gene_variant	6372	1120383	c.*4699C>T	0	0	0	0	0	1	0	0	0	0	1	0	0	0	0	0	0	0	0	0	0	0	0	0	0	0	0	0	0	0	0	0	0	0	0	0	0	0	0	0	0	0	0
ERG6_11	CPAR2_405010	ERG6	upstream_gene_variant	6372	1127868	c.-1656A>G	0	0	0	1	0	0	0	0	0	0	0	0	0	0	0	1	0	1	1	0	0	0	1	0	0	0	0	0	0	0	0	0	0	0	0	0	0	0	0	0	0	0	0
ERG6_12	CPAR2_405010	ERG6	missense_variant	6372	1125303	p.Ser304Gly/c.910A>G	0	0	1	1	0	1	1	0	1	1	1	0	1	1	1	1	0	1	1	0	1	1	1	0	0	0	1	0	0	0	0	1	1	0	0	0	0	1	1	1	1	1	0
ERG7_1	CPAR2_301800	ERG7	downstream_gene_variant	5806	419681	c.*874G>A	0	0	0	0	0	0	0	0	0	0	0	0	0	0	0	0	0	0	0	0	0	0	0	0	0	0	0	0	0	0	0	0	0	0	0	0	0	0	0	0	0	0	0
ERG7_2	CPAR2_301800	ERG7	synonymous_variant	5806	421932	p.Ile268Ile/c.804C>T	0	0	0	0	0	0	0	0	0	0	0	0	0	0	0	0	0	0	0	0	0	0	0	0	0	0	1	0	0	0	0	0	0	0	0	0	0	0	0	0	0	0	0
ERG7_3	CPAR2_301800	ERG7	downstream_gene_variant	5806	417081	c.*3474C>T	0	0	0	0	0	0	0	0	0	0	0	0	0	0	0	0	0	0	0	0	0	0	0	0	0	0	0	0	0	0	0	0	0	0	0	0	0	0	0	0	0	0	0
ERG7_4	CPAR2_301800	ERG7	downstream_gene_variant	5806	420480	c.*75C>T	0	0	0	0	0	0	0	0	0	0	0	0	0	0	0	0	0	0	0	0	0	0	0	0	0	0	0	0	0	0	0	0	0	0	0	0	0	0	0	0	0	1	0
ERG7_5	CPAR2_301800	ERG7	missense_variant	5806	421124	p.Ser538Pro/c.1612T>C	0	0	0	0	0	0	0	0	0	0	0	0	0	0	0	0	0	0	0	0	0	0	0	0	0	0	0	0	0	0	0	0	0	0	0	0	0	0	0	0	0	1	0
ERG7_6	CPAR2_301800	ERG7	downstream_gene_variant	5806	416888	c.*3667C>T	0	0	0	0	0	0	0	0	1	0	0	0	0	0	0	0	0	0	0	0	0	0	0	0	0	0	0	0	0	0	0	0	0	0	0	0	0	0	0	0	0	0	0
ERG7_7	CPAR2_301800	ERG7	upstream_gene_variant	5806	424500	c.-1765T>C	0	0	0	0	0	0	0	0	0	0	0	0	0	0	0	0	0	0	0	0	1	0	0	0	0	0	0	0	0	0	0	0	0	0	0	0	0	0	0	0	0	0	0
ERG7_8	CPAR2_301800	ERG7	downstream_gene_variant	5806	419695	c.*860G>A	0	0	0	0	0	0	0	0	1	1	0	0	0	0	0	0	0	0	0	0	1	0	0	0	0	0	0	0	0	0	0	0	0	0	0	0	0	0	1	0	0	1	0
ERG7_9	CPAR2_301800	ERG7	upstream_gene_variant	5806	426938	c.-4203G>C	0	0	0	0	0	0	0	0	0	0	0	0	0	0	0	1	0	0	0	0	0	0	0	0	0	0	0	0	0	0	0	0	0	0	0	0	0	0	0	0	0	0	0
FKS1_1	CPAR2_106400	FKS1	upstream_gene_variant	5569	1379908	c.-1728_-1727insT	0	0	0	1	0	1	0	0	1	0	0	0	0	0	1	1	0	1	1	0	1	1	1	0	0	0	0	0	0	0	0	0	1	0	0	0	0	1	1	0	1	1	0
FKS1_2	CPAR2_106400	FKS1	downstream_gene_variant	5569	1372330	c.*131A>G	0	0	1	1	0	1	0	0	1	1	1	0	1	1	0	1	0	1	1	0	1	0	1	0	0	0	0	0	0	0	0	0	0	0	0	0	0	0	1	0	0	1	0
FKS1_3	CPAR2_106400	FKS1	missense_variant	5569	1377368	p.Ala275Thr/c.823G>A	0	0	1	0	0	0	0	0	0	0	0	0	0	0	0	0	0	0	0	0	0	0	0	0	0	0	0	0	0	0	0	0	0	0	0	0	0	0	0	0	0	0	0
FKS1_4	CPAR2_106400	FKS1	upstream_gene_variant	5569	1378335	c.-145A>G	0	0	0	0	0	0	0	0	0	0	0	0	0	0	0	0	0	0	0	0	1	0	0	0	0	0	0	0	0	0	0	0	0	0	0	0	0	0	0	0	0	0	0
FKS1_5	CPAR2_106400	FKS1	synonymous_variant	5569	1377060	p.Phe377Phe/c.1131C>T	0	0	1	0	0	0	0	0	0	0	0	0	0	0	0	0	0	0	0	0	0	0	0	0	0	0	0	0	0	0	0	1	0	0	0	0	0	0	0	0	0	0	0
FKS1_6	CPAR2_106400	FKS1	downstream_gene_variant	5569	1370936	c.*1525G>A	0	0	0	1	0	1	0	0	1	1	1	0	1	1	0	1	0	0	1	0	1	0	1	0	0	0	0	0	0	0	0	1	1	0	0	0	0	0	1	0	0	1	0
FKS1_7	CPAR2_106400	FKS1	upstream_gene_variant	5569	1380517	c.-2327A>C	0	0	0	0	0	1	0	0	0	0	1	0	0	0	0	0	0	0	0	0	0	0	0	0	0	0	0	0	0	0	0	0	0	0	0	0	0	0	0	0	0	0	0
FKS1_8	CPAR2_106400	FKS1	upstream_gene_variant	5569	1381378	c.-3188T>A	0	0	0	0	0	0	0	0	0	0	0	0	0	0	0	0	0	0	0	0	0	0	0	0	0	0	0	0	0	0	0	0	0	0	0	0	0	0	1	0	0	1	0
FKS1_9	CPAR2_106400	FKS1	missense_variant	5569	1375562	p.Asp877Asn/c.2629G>A	0	0	0	0	0	0	0	0	0	0	0	0	0	0	0	0	0	0	0	0	0	0	0	0	0	0	0	0	0	0	0	0	0	0	0	0	0	0	0	0	0	0	0
FKS1_10	CPAR2_106400	FKS1	upstream_gene_variant	5569	1382864	c.-4674C>G	0	0	0	0	0	0	0	0	0	0	0	0	0	0	1	0	0	0	0	0	0	1	0	0	0	0	0	0	0	0	0	0	1	0	0	0	0	1	0	0	1	0	0
FKS1_11	CPAR2_106400	FKS1	upstream_gene_variant	5569	1378757	c.-570_-569delTT	0	0	0	0	0	0	0	0	0	0	0	0	1	0	0	0	0	0	0	0	0	0	0	0	0	0	0	0	0	0	0	0	0	0	0	0	0	0	0	0	0	0	0
FKS1_12	CPAR2_106400	FKS1	downstream_gene_variant	5569	1370338	c.*2123C>T	0	0	0	0	0	0	0	0	0	0	0	0	1	0	0	0	0	0	0	0	0	0	0	0	0	0	0	0	0	0	0	0	0	0	0	0	0	0	0	0	0	0	0
FUR1_1	CPAR2_502030	FUR1	upstream_gene_variant	6139	463919	c.-3791delT	0	0	0	0	0	0	0	0	0	0	0	0	0	1	0	0	0	0	0	0	0	0	0	0	0	0	0	0	0	0	0	0	0	0	0	0	0	0	0	0	0	0	0
FUR1_2	CPAR2_502030	FUR1	downstream_gene_variant	6139	455213	c.*4270C>T	0	0	0	0	0	0	0	0	0	0	0	0	0	1	0	0	0	0	0	0	0	0	0	0	0	0	0	0	0	0	0	0	0	0	0	0	0	0	0	0	0	0	0
FUR1_3	CPAR2_502030	FUR1	upstream_gene_variant	6139	461292	c.-1153T>A	0	0	0	0	0	0	0	0	0	0	0	0	1	1	0	0	0	0	0	0	0	0	0	0	0	0	0	0	0	0	0	0	0	0	0	0	0	0	0	0	0	0	0
FUR1_4	CPAR2_502030	FUR1	upstream_gene_variant	6139	464871	c.-4740delC	1	1	0	0	0	0	0	1	0	0	0	0	0	0	0	0	1	0	0	0	0	0	0	0	0	0	0	0	0	0	0	0	0	1	0	1	1	0	0	0	0	0	0
FUR1_5	CPAR2_502030	FUR1	upstream_gene_variant	6139	461441	c.-1302G>A	0	0	0	0	0	0	0	0	0	0	0	0	0	0	0	0	0	0	0	0	0	0	0	0	0	0	1	0	0	0	0	0	0	0	0	0	0	0	0	0	0	0	0
FUR1_6	CPAR2_502030	FUR1	downstream_gene_variant	6139	458196	c.*1287G>A	0	0	0	0	0	0	0	0	0	0	0	0	0	0	0	0	0	0	0	0	1	0	0	0	0	0	0	0	0	0	0	0	0	0	0	0	0	0	1	0	0	1	0
HOG1_1	CPAR2_211840	HOG1	upstream_gene_variant	5809	2542052	c.-750G>A	0	0	0	0	0	0	0	0	1	0	0	0	0	0	0	0	0	0	0	0	0	0	0	0	0	0	0	0	0	0	0	0	0	0	0	0	0	0	0	0	0	0	0
HOG1_2	CPAR2_211840	HOG1	upstream_gene_variant	5809	2542771	c.-31C>T	0	0	0	0	0	0	0	0	0	0	0	0	1	0	0	0	0	0	0	0	0	0	0	0	0	0	0	0	0	0	0	0	0	0	0	0	0	0	0	0	0	0	0
HOG1_3	CPAR2_211840	HOG1	missense_variant	5809	2543761	p.Lys320Asn/c.960G>T	0	0	0	0	0	0	0	0	0	0	0	0	0	0	0	0	0	0	0	0	0	0	0	0	0	0	0	0	0	0	0	0	0	0	0	0	0	0	0	0	0	0	0
HOG1_4	CPAR2_211840	HOG1	upstream_gene_variant	5809	2541486	c.-1316C>A	0	0	0	0	0	0	0	0	0	0	0	0	1	0	0	0	0	0	0	0	0	0	0	0	0	0	0	0	0	0	0	0	0	0	0	0	0	0	0	0	0	0	0
HOG1_5	CPAR2_211840	HOG1	downstream_gene_variant	5809	2546351	c.*2350T>C	0	0	0	1	0	0	0	0	0	0	0	0	0	0	0	1	0	0	1	0	0	0	1	0	0	0	0	0	0	0	0	0	0	0	0	0	0	0	0	0	0	0	0
HOG1_6	CPAR2_211840	HOG1	upstream_gene_variant	5809	2538401	c.-4401G>A	0	0	0	0	0	0	0	0	0	1	0	0	0	0	0	0	0	0	0	0	0	0	0	0	0	0	0	0	0	0	0	0	0	0	0	0	0	0	1	0	0	0	0
HOG1_7	CPAR2_211840	HOG1	downstream_gene_variant	5809	2546670	c.*2669G>A	0	0	1	1	0	1	0	0	1	1	1	0	1	1	1	1	0	1	1	0	1	1	1	0	0	0	0	0	0	0	0	1	1	0	0	0	0	1	1	0	1	1	0
HOG1_8	CPAR2_211840	HOG1	downstream_gene_variant	5809	2548307	c.*4306A>G	0	0	1	0	0	0	0	0	0	0	0	0	0	0	0	0	0	0	0	0	0	0	0	0	0	0	0	0	0	0	0	1	0	0	0	0	0	0	0	0	0	0	0
HOG1_9	CPAR2_211840	HOG1	downstream_gene_variant	5809	2548048	c.*4047T>C	0	0	0	0	0	0	0	0	0	0	0	0	0	0	0	0	0	0	0	0	0	0	0	0	0	0	0	0	1	0	0	0	0	0	0	0	0	0	0	0	0	0	0
MDR1_1	CPAR2_301760	MDR1	upstream_gene_variant	5806	406039	c.-3089C>T	0	0	0	0	0	0	0	0	0	0	0	0	1	0	0	0	0	0	0	0	0	0	0	0	0	0	0	0	0	0	0	0	0	0	0	0	0	0	0	0	0	0	0
MDR1_2	CPAR2_301760	MDR1	downstream_gene_variant	5806	412702	c.*1898G>A	0	0	0	0	0	0	0	0	1	0	0	0	0	0	0	0	0	0	0	0	0	0	0	0	0	0	0	0	0	0	0	0	0	0	0	0	0	0	0	0	0	0	0
MDR1_3	CPAR2_301760	MDR1	upstream_gene_variant	5806	405108	c.-4020A>G	0	0	0	0	0	0	0	0	0	0	0	0	0	1	0	0	0	0	0	0	0	0	0	0	0	0	0	0	0	0	0	0	0	0	0	0	0	0	0	0	0	0	0
MDR1_4	CPAR2_301760	MDR1	downstream_gene_variant	5806	414554	c.*3750A>T	0	0	0	0	0	0	0	0	0	0	0	0	1	0	0	0	0	0	0	0	0	0	0	0	0	0	0	0	0	0	0	0	0	0	0	0	0	0	0	0	0	0	0
MDR1_5	CPAR2_301760	MDR1	upstream_gene_variant	5806	408788	c.-340T>C	0	0	0	0	0	0	0	0	0	1	0	0	0	0	0	0	0	0	0	0	0	0	0	0	0	0	0	0	0	0	0	0	0	0	0	0	0	0	0	0	0	0	0
MDR1_6	CPAR2_301760	MDR1	upstream_gene_variant	5806	407073	c.-2055C>T	0	0	0	0	0	0	0	0	0	1	0	0	0	0	0	0	0	0	0	0	0	0	0	0	0	0	0	0	0	0	0	0	0	0	0	0	0	0	0	0	0	0	0
MDR1_7	CPAR2_301760	MDR1	upstream_gene_variant	5806	407008	c.-2120C>T	0	0	0	0	0	0	0	0	0	0	0	0	1	0	0	0	0	0	0	0	0	0	0	0	0	0	0	0	0	0	0	0	0	0	0	0	0	0	0	0	0	0	0
MDR1_8	CPAR2_301760	MDR1	downstream_gene_variant	5806	414366	c.*3562C>T	0	0	0	0	0	0	0	0	1	1	0	0	0	0	0	0	0	0	0	0	1	0	0	0	0	0	0	0	0	0	0	0	0	0	0	0	0	0	1	0	0	1	0
MDR1_9	CPAR2_301760	MDR1	upstream_gene_variant	5806	406061	c.-3067T>A	0	0	1	1	0	1	1	0	1	1	1	0	1	1	1	1	0	1	1	0	1	1	1	0	0	0	1	0	0	0	0	1	1	0	0	0	0	1	1	0	1	1	0
MDR1_10	CPAR2_301760	MDR1	missense_variant	5806	410313	p.Ile396Val/c.1186A>G	0	0	0	0	0	0	0	0	0	1	0	0	0	0	0	0	0	0	0	0	0	0	0	0	0	0	0	0	0	0	0	0	0	0	0	0	0	0	1	0	0	0	0
MDR1_11	CPAR2_301760	MDR1	upstream_gene_variant	5806	408749	c.-370delG	0	0	0	1	0	0	0	0	1	0	0	0	1	0	0	1	0	1	1	0	1	0	1	0	0	0	0	0	0	0	0	0	0	0	0	0	0	0	1	0	0	1	0
MDR1_12	CPAR2_301760	MDR1	upstream_gene_variant	5806	405091	c.-4037G>A	0	0	1	0	0	0	0	0	0	0	0	0	0	0	0	0	0	0	0	0	0	0	0	0	0	0	0	0	0	0	0	0	0	0	0	0	0	0	0	0	0	0	0
MDR1_13	CPAR2_301760	MDR1	downstream_gene_variant	5806	412821	c.*2017T>C	0	0	0	0	0	0	0	0	0	0	0	0	0	0	0	0	0	0	1	0	0	0	0	0	0	0	0	0	0	0	0	0	0	0	0	0	0	0	0	0	0	0	0
MLH1_1	CPAR2_401150	MLH1	upstream_gene_variant	6372	230257	c.-3428A>C	0	0	0	0	0	0	0	0	1	1	0	0	0	0	0	0	0	0	0	0	1	0	0	0	0	0	0	0	0	0	0	0	0	0	0	0	0	0	1	0	0	1	0
MLH1_2	CPAR2_401150	MLH1	downstream_gene_variant	6372	237491	c.*1554T>C	0	0	0	0	0	0	0	0	0	0	0	0	0	1	0	0	0	0	0	0	0	0	0	0	0	0	0	0	0	0	0	0	0	0	0	0	0	0	0	0	0	0	0
MLH1_3	CPAR2_401150	MLH1	upstream_gene_variant	6372	229584	c.-4101G>A	0	0	0	0	0	0	0	0	0	0	0	0	0	0	0	0	0	0	0	0	0	0	0	0	0	0	0	0	0	0	0	0	0	0	0	0	0	0	0	0	0	0	0
MLH1_4	CPAR2_401150	MLH1	downstream_gene_variant	6372	239402	c.*3465C>T	0	0	0	0	0	1	0	0	0	0	1	0	0	0	0	0	0	0	0	0	0	0	0	0	0	0	0	0	0	0	0	0	0	0	0	0	0	0	0	0	0	0	0
MLH1_5	CPAR2_401150	MLH1	upstream_gene_variant	6372	229225	c.-4457delCinsTTTT	0	0	1	1	0	1	0	0	1	1	1	0	1	1	1	1	0	1	1	0	1	1	1	0	0	0	0	0	0	0	0	0	1	0	0	0	0	1	1	0	1	1	0
MLH1_6	CPAR2_401150	MLH1	upstream_gene_variant	6372	230054	c.-3631T>C	0	0	1	0	0	0	0	0	0	0	0	0	0	0	0	0	0	0	0	0	0	0	0	0	0	0	0	0	0	0	0	0	0	0	0	0	0	0	0	0	0	0	0
MLH1_7	CPAR2_401150	MLH1	downstream_gene_variant	6372	236962	c.*1025C>T	0	0	0	1	0	0	0	0	0	0	0	0	0	0	0	1	0	1	1	0	0	0	1	0	0	0	0	0	0	0	0	0	0	0	0	0	0	0	0	0	0	0	0
MLH1_8	CPAR2_401150	MLH1	missense_variant	6372	234054	p.Asp124Asn/c.370G>A	0	0	0	0	0	0	0	0	0	0	0	0	1	0	0	0	0	0	0	0	0	0	0	0	0	0	0	0	0	0	0	0	0	0	0	0	0	0	0	0	0	0	0
MLH1_9	CPAR2_401150	MLH1	upstream_gene_variant	6372	230414	c.-3271G>A	0	0	0	0	0	0	0	0	0	0	0	0	1	0	0	0	0	0	0	0	0	0	0	0	0	0	0	0	0	0	0	0	0	0	0	0	0	0	0	0	0	0	0
MLH1_10	CPAR2_401150	MLH1	upstream_gene_variant	6372	230896	c.-2778delA	0	0	0	0	0	1	0	0	0	0	1	0	1	0	0	0	0	0	0	0	0	0	0	0	0	0	0	0	0	0	0	0	0	0	0	0	0	0	0	0	0	0	0
MLH1_11	CPAR2_401150	MLH1	upstream_gene_variant	6372	230927	c.-2758T>C	1	1	1	1	1	1	1	1	1	1	1	1	1	1	1	1	1	1	1	1	1	1	1	1	1	1	1	1	1	1	1	1	1	1	1	1	1	1	1	1	1	1	1
MLH1_12	CPAR2_401150	MLH1	synonymous_variant	6372	234146	p.Lys154Lys/c.462G>A	0	0	0	0	0	0	0	0	0	0	0	0	0	0	0	0	0	0	0	0	0	0	0	0	0	0	0	0	0	0	0	0	0	0	0	0	0	0	0	0	0	0	0
MLH1_13	CPAR2_401150	MLH1	downstream_gene_variant	6372	238372	c.*2435A>G	0	0	0	0	0	0	0	0	0	0	0	0	1	0	0	0	0	0	0	0	0	0	0	0	0	0	0	0	0	0	0	0	0	0	0	0	0	0	0	0	0	0	0
MRR1a_1	CPAR2_807270	MRR1a	downstream_gene_variant	5807	1680638	c.*194C>T	0	0	0	0	0	0	1	0	0	0	0	0	0	0	0	0	0	0	0	0	0	0	0	0	0	0	0	0	0	0	0	0	0	0	0	0	0	0	0	0	0	0	0
MRR1a_2	CPAR2_807270	MRR1a	upstream_gene_variant	5807	1672320	c.-4738C>T	0	0	0	1	0	0	0	0	0	0	0	0	0	0	0	1	0	1	1	0	0	0	1	0	0	0	0	0	0	0	0	0	0	0	0	0	0	0	0	0	0	0	0
MRR1a_3	CPAR2_807270	MRR1a	downstream_gene_variant	5807	1684459	c.*4015A>T	0	0	0	0	0	0	0	0	0	0	0	0	1	1	0	0	0	0	0	0	0	0	0	0	0	0	0	0	0	0	0	0	0	0	0	0	0	0	0	0	0	0	0
MRR1a_4	CPAR2_807270	MRR1a	upstream_gene_variant	5807	1677005	c.-53G>A	0	0	0	0	0	0	0	0	0	0	0	0	1	0	0	0	0	0	0	0	0	0	0	0	0	0	0	0	0	0	0	0	0	0	0	0	0	0	0	0	0	0	0
MRR1a_5	CPAR2_807270	MRR1a	downstream_gene_variant	5807	1684193	c.*3755_*3756insA	0	0	0	0	0	1	0	0	0	0	1	0	0	0	0	0	0	0	0	0	0	0	0	0	0	0	0	0	0	0	0	0	0	0	0	0	0	0	0	0	0	0	0
MRR1a_6	CPAR2_807270	MRR1a	upstream_gene_variant	5807	1674650	c.-2408T>C	0	0	0	0	0	1	0	0	0	0	1	0	0	0	0	0	0	0	0	0	0	0	0	0	0	0	0	0	0	0	0	0	0	0	0	0	0	0	0	0	0	0	0
MRR1a_7	CPAR2_807270	MRR1a	downstream_gene_variant	5807	1682140	c.*1696T>C	0	0	1	0	0	0	0	0	0	0	0	0	0	0	0	0	0	0	0	0	0	0	0	0	0	0	0	0	0	0	0	1	0	0	0	0	0	0	0	0	0	0	0
MRR1a_8	CPAR2_807270	MRR1a	missense_variant	5807	1677588	p.Lys177Asn/c.531G>T	0	0	1	0	0	0	0	0	0	0	0	0	0	0	0	0	0	0	0	0	0	0	0	0	0	0	0	0	0	0	0	1	0	0	0	0	0	0	0	0	0	0	0
MRR1a_9	CPAR2_807270	MRR1a	upstream_gene_variant	5807	1674793	c.-2265T>C	0	0	0	0	0	0	0	0	0	0	0	0	1	1	0	0	0	0	0	0	0	0	0	0	0	0	0	0	0	0	0	0	0	0	0	0	0	0	0	0	0	0	0
MSH2_1	CPAR2_500160	MSH2	upstream_gene_variant	6139	42023	c.-3791C>T	0	0	0	0	0	0	0	0	0	0	0	0	1	0	0	0	0	0	0	0	0	0	0	0	0	0	0	0	0	0	0	0	0	0	0	0	0	0	0	0	0	0	0
MSH2_2	CPAR2_500160	MSH2	upstream_gene_variant	6139	39952	c.-1731delT	0	0	1	0	0	0	0	0	0	0	0	0	0	0	0	0	0	0	0	0	0	0	0	0	0	0	0	0	0	0	0	0	0	0	0	0	0	0	0	0	0	0	0
MSH2_3	CPAR2_500160	MSH2	upstream_gene_variant	6139	41624	c.-3392G>A	0	0	0	0	0	0	0	0	0	0	0	0	1	0	0	0	0	0	0	0	0	0	0	0	0	0	0	0	0	0	0	0	0	0	0	0	0	0	0	0	0	0	0
MSH2_4	CPAR2_500160	MSH2	missense_variant	6139	37380	p.Val285Met/c.853G>A	0	0	0	0	0	0	0	0	0	0	0	0	0	0	0	0	0	0	0	0	0	0	0	0	0	0	1	0	0	0	0	0	0	0	0	0	0	0	0	0	0	0	0
MSH2_5	CPAR2_500160	MSH2	downstream_gene_variant	6139	33198	c.*2362C>T	0	0	0	0	0	0	0	0	0	0	0	0	1	0	0	0	0	0	0	0	0	0	0	0	0	0	0	0	0	0	0	0	0	0	0	0	0	0	0	0	0	0	0
MSH2_6	CPAR2_500160	MSH2	upstream_gene_variant	6139	41564	c.-3332A>G	0	0	0	0	0	0	0	0	0	0	0	0	0	0	0	0	0	0	0	0	0	0	0	0	0	0	0	0	0	0	0	0	0	0	0	0	0	0	0	0	0	0	0
MSH2_7	CPAR2_500160	MSH2	downstream_gene_variant	6139	35308	c.*252C>T	0	0	0	0	0	1	0	0	0	0	1	0	0	0	0	0	0	0	0	0	0	0	0	0	0	0	0	0	0	0	0	0	0	0	0	0	0	0	0	0	0	0	0
MSH2_8	CPAR2_500160	MSH2	upstream_gene_variant	6139	40742	c.-2510C>T	0	0	1	0	0	1	0	0	0	0	1	0	1	1	0	0	0	0	0	0	0	0	0	0	0	0	0	0	0	0	0	1	0	0	0	0	0	0	0	0	0	0	0
MSH2_9	CPAR2_500160	MSH2	upstream_gene_variant	6139	38482	c.-250G>A	0	0	0	0	0	0	0	0	0	0	0	0	0	0	0	0	0	0	0	0	0	0	0	0	0	0	0	0	0	0	0	0	0	0	0	0	0	0	0	0	0	0	0
MSH2_10	CPAR2_500160	MSH2	downstream_gene_variant	6139	33328	c.*2232C>T	0	0	1	0	0	0	0	0	0	0	0	0	0	0	0	0	0	0	0	0	0	0	0	0	0	0	0	0	0	0	0	1	0	0	0	0	0	0	0	0	0	0	0
MSH2_11	CPAR2_500160	MSH2	upstream_gene_variant	6139	41272	c.-3040G>A	0	0	0	0	0	0	0	0	0	0	0	0	0	0	0	0	0	0	0	0	0	0	0	0	0	0	1	0	0	0	0	0	0	0	0	0	0	0	0	0	0	0	0
MSH2_12	CPAR2_500160	MSH2	upstream_gene_variant	6139	43031	c.-4799T>C	0	0	0	0	0	0	0	0	0	0	0	0	0	0	0	0	0	0	0	0	1	0	0	0	0	0	0	0	0	0	0	0	0	0	0	0	0	0	0	0	0	0	0
MSH2_13	CPAR2_500160	MSH2	upstream_gene_variant	6139	40563	c.-2331G>A	1	1	0	0	0	0	0	0	0	0	0	0	0	0	0	0	1	0	0	0	0	0	0	0	0	0	0	0	0	0	0	0	0	1	0	1	0	0	0	0	0	0	0
MSH2_14	CPAR2_500160	MSH2	upstream_gene_variant	6139	40520	c.-2288T>C	0	1	0	0	0	0	0	0	0	0	0	0	0	0	0	0	1	0	0	0	0	0	0	1	0	0	0	0	0	0	0	0	0	1	0	1	0	0	0	1	0	0	0
MSH2_15	CPAR2_500160	MSH2	upstream_gene_variant	6139	40485	c.-2253A>G	1	1	0	0	0	0	0	1	0	0	0	0	0	0	0	0	1	0	0	0	0	0	0	1	0	1	0	0	0	0	1	0	0	1	0	1	0	0	0	1	0	0	0
MSH2_16	CPAR2_500160	MSH2	upstream_gene_variant	6139	40530	c.-2298A>G	0	0	0	0	0	0	0	0	0	0	0	0	0	0	0	0	1	0	0	0	0	0	0	1	0	0	0	0	0	0	0	0	0	1	0	1	0	0	0	0	0	0	0
MSH2_17	CPAR2_500160	MSH2	upstream_gene_variant	6139	39870	c.-1638C>A	0	0	0	0	0	0	0	0	0	0	0	0	0	0	0	0	0	0	0	0	0	0	0	0	0	0	0	0	0	0	0	0	0	0	0	0	0	0	0	0	0	0	0
PDR1_1	CPAR2_802630	PDR1	missense_variant	5807	583012	p.Lys756Glu/c.2266A>G	0	0	0	0	0	0	0	0	0	0	0	0	0	0	0	0	0	0	0	0	1	0	0	0	0	0	0	0	0	0	0	0	0	0	0	0	0	0	0	0	0	0	0
PDR1_2	CPAR2_802630	PDR1	upstream_gene_variant	5807	575956	c.-4791T>G	1	1	1	1	1	1	1	1	1	1	1	1	1	1	1	1	1	1	1	1	1	1	1	1	1	1	1	1	1	1	1	0	1	1	1	1	1	1	1	1	1	1	1
PDR1_3	CPAR2_802630	PDR1	upstream_gene_variant	5807	577020	c.-3727A>G	0	0	1	0	0	0	0	0	0	0	0	0	0	0	0	0	0	0	0	0	0	0	0	0	0	0	0	0	0	0	0	0	0	0	0	0	0	0	0	0	0	0	0
PDR1_4	CPAR2_802630	PDR1	downstream_gene_variant	5807	584421	c.*492A>G	0	0	1	1	0	1	0	0	1	1	1	0	1	1	1	1	0	1	1	0	1	1	1	0	0	0	0	0	0	0	0	1	1	0	0	0	0	1	1	0	1	1	0
PDR1_5	CPAR2_802630	PDR1	downstream_gene_variant	5807	588002	c.*4073T>C	0	0	0	0	0	0	0	0	1	0	0	0	0	0	0	0	0	0	0	0	0	0	0	0	0	0	0	0	0	0	0	0	0	0	0	0	0	0	0	0	0	0	0
PDR1_6	CPAR2_802630	PDR1	upstream_gene_variant	5807	577710	c.-3037T>C	0	0	0	0	0	0	0	0	0	0	0	0	0	0	0	0	0	0	0	0	0	0	0	0	0	0	0	0	0	0	0	0	0	0	0	0	0	0	0	0	0	0	0
PDR1_7	CPAR2_802630	PDR1	upstream_gene_variant	5807	580687	c.-60C>T	0	0	0	0	0	0	0	0	0	0	0	0	0	0	0	0	0	0	0	0	0	0	0	0	0	0	1	0	0	0	0	0	0	0	0	0	0	0	0	0	0	0	0
PDR1_8	CPAR2_802630	PDR1	upstream_gene_variant	5807	576106	c.-4641G>A	0	0	0	1	0	0	0	0	0	0	0	0	0	0	0	1	0	1	1	0	0	0	1	0	0	0	0	0	0	0	0	0	0	0	0	0	0	0	0	0	0	0	0
PDR1_9	CPAR2_802630	PDR1	upstream_gene_variant	5807	578569	c.-2178G>A	1	1	1	1	1	1	1	1	1	1	0	1	1	1	1	1	1	1	1	1	1	1	1	1	1	1	0	1	1	1	1	0	1	1	1	1	1	1	1	1	1	1	1
PDR1_10	CPAR2_802630	PDR1	upstream_gene_variant	5807	576166	c.-4581C>T	0	0	0	0	0	0	0	0	0	0	0	0	0	0	1	0	0	0	0	0	0	1	0	0	0	0	0	0	0	0	0	0	1	0	0	0	0	1	0	0	1	0	0
PMS1_1	CPAR2_806260	PMS1	upstream_gene_variant	5807	1425399	c.-84T>C	0	0	1	1	0	1	0	0	1	1	1	0	1	1	0	1	0	1	1	0	1	0	1	0	0	0	0	0	0	0	0	1	0	0	0	0	0	0	1	0	0	1	0
PMS1_2	CPAR2_806260	PMS1	upstream_gene_variant	5807	1429834	c.-4519A>G	0	0	0	0	0	0	0	0	0	0	0	0	0	0	1	0	0	0	0	0	0	0	0	0	0	0	0	0	0	0	0	0	1	0	0	0	0	0	0	0	0	0	0
PMS1_3	CPAR2_806260	PMS1	missense_variant	5807	1424003	p.Thr438Ile/c.1313C>T	0	0	1	0	0	0	0	0	0	0	0	0	0	0	0	0	0	0	0	0	0	0	0	0	0	0	0	0	0	0	0	1	0	0	0	0	0	0	0	0	0	0	0
PMS1_4	CPAR2_806260	PMS1	missense_variant	5807	1423500	p.Lys606Glu/c.1816A>G	0	0	1	0	0	1	0	0	0	0	1	0	1	1	0	0	0	0	0	0	0	0	0	0	0	0	0	0	0	0	0	1	0	0	0	0	0	0	0	0	0	0	0
PMS1_5	CPAR2_806260	PMS1	upstream_gene_variant	5807	1426765	c.-1450C>T	0	0	1	0	0	0	0	0	0	0	0	0	0	0	0	0	0	0	0	0	0	0	0	0	0	0	0	0	0	0	0	0	0	0	0	0	0	0	0	0	0	0	0
PMS1_6	CPAR2_806260	PMS1	downstream_gene_variant	5807	1418020	c.*4653T>C	0	0	0	0	0	0	0	0	1	1	0	0	0	0	0	0	0	0	0	0	0	0	0	0	0	0	0	0	0	0	0	0	0	0	0	0	0	0	0	0	0	0	0
PMS1_7	CPAR2_806260	PMS1	downstream_gene_variant	5807	1418520	c.*4153T>G	0	0	0	0	0	0	0	0	0	0	0	0	1	0	0	0	0	0	0	0	0	0	0	0	0	0	0	0	0	0	0	0	0	0	0	0	0	0	0	0	0	0	0
PMS1_8	CPAR2_806260	PMS1	synonymous_variant	5807	1424968	p.Thr116Thr/c.348A>T	0	0	0	0	0	0	0	0	0	0	0	0	1	0	0	0	0	0	0	0	0	0	0	0	0	0	0	0	0	0	0	0	0	0	0	0	0	0	0	0	0	0	0
PMS1_9	CPAR2_806260	PMS1	upstream_gene_variant	5807	1425334	c.-19G>A	0	0	1	1	0	1	1	0	1	1	1	0	1	1	1	1	0	1	1	0	1	1	1	0	0	0	0	0	1	0	0	1	1	0	0	0	0	1	1	0	1	1	0
PMS1_10	CPAR2_806260	PMS1	downstream_gene_variant	5807	1418410	c.*4258_*4259insTCT	0	0	0	0	0	0	0	0	1	0	1	0	1	0	1	1	0	1	1	0	1	1	1	0	0	0	0	0	0	0	0	0	1	0	0	0	0	1	1	0	1	1	0
STE6_1	CPAR2_404230	STE6	downstream_gene_variant	6372	943283	c.*3863C>T	0	0	1	0	0	0	0	0	0	0	0	0	0	0	0	0	0	0	0	0	0	0	0	0	0	0	0	0	0	0	0	1	0	0	0	0	0	0	0	0	0	0	0
STE6_2	CPAR2_404230	STE6	missense_variant	6372	947760	p.Tyr977His/c.2929T>C	0	0	0	0	0	1	0	0	0	0	1	0	0	0	0	0	0	0	0	0	0	0	0	0	0	0	0	0	0	0	0	0	0	0	0	0	0	0	0	0	0	0	0
STE6_3	CPAR2_404230	STE6	missense_variant	6372	948110	p.Gly860Val/c.2579G>T	0	0	0	0	0	0	0	0	0	0	0	0	1	0	0	0	0	0	0	0	0	0	0	0	0	0	0	0	0	0	0	0	0	0	0	0	0	0	0	0	0	0	0
STE6_4	CPAR2_404230	STE6	upstream_gene_variant	6372	950723	c.-35T>C	0	0	0	0	0	0	0	0	0	0	0	0	0	0	0	1	0	1	1	0	1	0	1	0	0	0	0	0	0	0	0	0	0	0	0	0	0	0	1	0	0	1	0
STE6_5	CPAR2_404230	STE6	upstream_gene_variant	6372	952512	c.-1840_-1839delGT	0	0	0	0	0	0	0	0	0	0	0	0	1	0	0	0	0	0	0	0	0	0	0	0	0	0	0	0	0	0	0	0	0	0	0	0	0	0	0	0	0	0	0
STE6_6	CPAR2_404230	STE6	missense_variant	6372	948039	p.Val884Ile/c.2650G>A	0	0	0	0	0	0	1	0	0	0	0	0	0	0	0	0	0	0	0	0	0	0	0	0	0	0	0	0	0	0	0	0	0	0	0	0	0	0	0	0	0	0	0
STE6_7	CPAR2_404230	STE6	upstream_gene_variant	6372	950881	c.-193T>C	0	0	0	1	0	0	0	0	0	0	0	0	0	0	0	1	0	1	1	0	0	0	1	0	0	0	0	0	0	0	0	0	0	0	0	0	0	0	0	0	0	0	0
STE6_8	CPAR2_404230	STE6	upstream_gene_variant	6372	953984	c.-3305delG	0	0	0	0	0	0	0	0	0	0	0	0	0	0	0	1	0	1	1	0	0	0	1	0	0	0	0	0	0	0	0	0	0	0	0	0	0	0	0	0	0	0	0
TAC1B_1	CPAR2_303520	TAC1B	upstream_gene_variant	5806	815475	c.-4158G>T	0	0	0	0	0	0	0	0	0	0	0	0	1	0	0	0	0	0	0	0	0	0	0	0	0	0	0	0	0	0	0	0	0	0	0	0	0	0	0	0	0	0	0
TAC1B_2	CPAR2_303520	TAC1B	downstream_gene_variant	5806	827883	c.*4600delC	0	0	1	0	0	0	0	0	1	0	1	0	0	0	0	1	0	1	1	0	1	0	1	0	0	0	0	0	0	0	0	0	0	0	0	0	0	0	1	0	0	1	0
TAC1B_3	CPAR2_303520	TAC1B	upstream_gene_variant	5806	816087	c.-3546A>G	0	0	0	0	0	0	0	0	0	0	0	0	0	0	0	0	0	1	0	0	0	0	0	0	0	0	0	0	0	0	0	0	0	0	0	0	0	0	0	0	0	0	0
TAC1B_4	CPAR2_303520	TAC1B	upstream_gene_variant	5806	818435	c.-1198G>A	0	0	0	0	0	0	0	0	0	0	0	0	0	0	0	0	0	0	0	0	0	0	0	0	0	0	1	0	0	0	0	0	0	0	0	0	0	0	0	0	0	0	0
TAC1B_5	CPAR2_303520	TAC1B	downstream_gene_variant	5806	824876	c.*1587T>C	0	0	0	0	0	0	0	0	0	0	0	0	0	0	0	1	0	0	0	0	0	0	1	0	0	0	0	0	0	0	0	0	0	0	0	0	0	0	0	0	0	0	0
TAC1B_6	CPAR2_303520	TAC1B	upstream_gene_variant	5806	816855	c.-2778A>G	0	0	0	0	0	0	0	0	0	0	0	0	1	0	0	0	0	0	0	0	0	0	0	0	0	0	0	0	0	0	0	0	0	0	0	0	0	0	0	0	0	0	0
TAC1B_7	CPAR2_303520	TAC1B	downstream_gene_variant	5806	826533	c.*3244G>A	0	0	0	0	0	0	0	0	0	0	0	0	1	0	0	0	0	0	0	0	0	0	0	0	0	0	0	0	0	0	0	0	0	0	0	0	0	0	0	0	0	0	0
TAC1B_8	CPAR2_303520	TAC1B	downstream_gene_variant	5806	828056	c.*4767G>A	0	0	0	0	0	1	0	0	0	0	1	0	0	0	0	0	0	0	0	0	0	0	0	0	0	0	0	0	0	0	0	0	0	0	0	0	0	0	0	0	0	0	0
TAC1B_9	CPAR2_303520	TAC1B	synonymous_variant	5806	820580	p.Pro316Pro/c.948G>C	0	0	0	0	0	1	0	0	0	0	1	0	0	0	0	0	0	0	0	0	0	0	0	0	0	0	0	0	0	0	0	0	0	0	0	0	0	0	0	0	0	0	0
TAC1B_10	CPAR2_303520	TAC1B	synonymous_variant	5806	819854	p.Ser74Ser/c.222G>A	0	0	0	0	0	1	0	0	0	0	1	0	0	0	0	0	0	0	0	0	0	0	0	0	0	0	0	0	0	0	0	0	0	0	0	0	0	0	0	0	0	0	0
TAC1B_11	CPAR2_303520	TAC1B	downstream_gene_variant	5806	825041	c.*1752G>A	0	0	0	0	0	0	0	0	1	1	0	0	0	0	0	0	0	0	0	0	1	0	0	0	0	0	0	0	0	0	0	0	0	0	0	0	0	0	1	0	0	1	0
TAC1B_12	CPAR2_303520	TAC1B	missense_variant	5806	823071	p.Pro1147Ser/c.3439C>T	0	0	0	0	0	0	0	0	0	0	0	0	0	0	0	0	0	0	0	0	0	0	0	0	0	0	0	0	0	0	0	0	0	0	0	0	0	0	0	0	0	0	0
TAC1B_13	CPAR2_303520	TAC1B	synonymous_variant	5806	820448	p.Asp272Asp/c.816C>T	0	0	0	0	0	0	0	0	1	1	0	0	0	0	0	0	0	0	0	0	1	0	0	0	0	0	0	0	0	0	0	0	0	0	0	0	0	0	1	0	0	1	0
TAC1B_14	CPAR2_303520	TAC1B	downstream_gene_variant	5806	825738	c.*2451_*2453delTTA	1	1	0	0	0	0	0	1	0	0	0	1	0	0	0	0	1	0	0	0	0	0	0	0	0	0	0	0	0	0	0	0	0	1	0	1	0	0	0	0	0	0	0
YMC1_1	CPAR2_208040	YMC1	downstream_gene_variant	5809	1730738	c.*1274A>C	0	0	0	0	0	0	0	0	1	0	0	0	0	0	0	0	0	0	0	0	1	0	0	0	0	0	0	0	0	0	0	0	0	0	0	0	0	0	1	0	0	1	0
YMC1_2	CPAR2_208040	YMC1	upstream_gene_variant	5809	1725661	c.-2895A>G	0	0	0	0	0	0	0	0	0	1	0	0	0	0	0	0	0	0	0	0	1	0	0	0	0	0	0	0	0	0	0	0	0	0	0	0	0	0	1	0	0	1	0
YMC1_3	CPAR2_208040	YMC1	upstream_gene_variant	5809	1725444	c.-3112_-3111delGGinsAA	0	0	0	0	0	0	0	0	0	0	0	0	1	0	0	0	0	0	0	0	0	0	0	0	0	0	0	0	0	0	0	0	0	0	0	0	0	0	0	0	0	0	0
YMC1_4	CPAR2_208040	YMC1	upstream_gene_variant	5809	1728461	c.-84delA	0	1	0	0	0	0	0	0	0	0	0	0	0	0	0	0	1	0	0	1	0	0	0	1	1	0	0	0	0	0	1	0	0	1	1	1	1	0	0	1	0	0	1
YMC1_5	CPAR2_208040	YMC1	downstream_gene_variant	5809	1730950	c.*1486A>T	1	1	0	0	1	0	0	1	0	0	0	1	0	0	0	0	1	0	0	1	0	0	0	1	1	1	0	1	0	1	1	0	0	1	1	1	1	0	0	1	0	0	1
YMC1_6	CPAR2_208040	YMC1	downstream_gene_variant	5809	1730920	c.*1456C>A	0	0	0	0	0	0	0	0	0	0	0	0	0	0	0	0	0	0	0	0	0	0	0	0	0	0	0	0	0	0	0	0	0	0	0	0	0	0	0	0	0	0	0
YMC1_7	CPAR2_208040	YMC1	upstream_gene_variant	5809	1725418	c.-3138C>T	0	0	1	0	0	0	0	0	0	0	0	0	0	0	0	0	0	0	0	0	0	0	0	0	0	0	0	0	0	0	0	0	0	0	0	0	0	0	0	0	0	0	0
YMC1_8	CPAR2_208040	YMC1	upstream_gene_variant	5809	1727559	c.-997G>A	0	0	0	0	0	0	0	0	1	1	0	0	0	0	0	0	0	0	0	0	1	0	0	0	0	0	0	0	0	0	0	0	0	0	0	0	0	0	1	0	0	1	0
YMC1_9	CPAR2_208040	YMC1	upstream_gene_variant	5809	1725084	c.-3472C>T	0	0	0	1	0	0	0	0	0	0	0	0	0	0	0	1	0	1	1	0	0	0	1	0	0	0	0	0	0	0	0	0	0	0	0	0	0	0	0	0	0	0	0
FKS1_1_1	CPAR2_804030	FKS1_1	downstream_gene_variant	5807	897051	c.*1389C>T	0	0	0	0	0	0	0	0	0	0	0	0	0	0	0	0	0	0	0	0	0	0	0	0	0	0	0	0	0	0	0	0	0	0	0	0	0	0	0	0	0	0	0
FKS1_1_2	CPAR2_804030	FKS1_1	upstream_gene_variant	5807	906222	c.-2596C>G	0	0	0	0	0	0	0	0	0	0	0	0	0	0	0	0	0	0	0	0	0	0	0	0	0	0	0	0	0	0	0	0	0	0	0	0	0	0	1	0	0	0	0
FKS1_1_3	CPAR2_804030	FKS1_1	downstream_gene_variant	5807	896029	c.*2398delT	0	0	0	0	0	0	0	0	0	0	0	0	0	0	0	0	0	0	0	0	0	0	0	0	0	0	0	0	0	0	0	0	0	0	0	0	0	0	0	0	1	0	0
FKS1_1_4	CPAR2_804030	FKS1_1	downstream_gene_variant	5807	897111	c.*1329A>G	0	0	0	0	0	0	0	0	0	0	0	0	0	0	1	0	0	0	0	0	0	1	0	0	0	0	0	0	0	0	0	0	1	0	0	0	0	1	0	0	1	0	0
FKS1_1_5	CPAR2_804030	FKS1_1	downstream_gene_variant	5807	898105	c.*335C>T	0	0	0	1	0	0	0	0	0	0	0	0	0	0	0	1	0	1	1	0	0	0	1	0	0	0	0	0	0	0	0	0	0	0	0	0	0	0	0	0	0	0	0
FKS1_1_6	CPAR2_804030	FKS1_1	downstream_gene_variant	5807	895133	c.*3307A>G	0	0	1	1	0	1	0	0	1	1	1	0	1	1	1	1	0	1	1	0	1	1	1	0	0	0	0	0	0	0	0	1	1	0	0	0	0	1	1	0	1	1	0
FKS1_1_7	CPAR2_804030	FKS1_1	upstream_gene_variant	5807	906254	c.-2628G>A	0	0	0	0	0	0	0	0	0	0	0	0	0	0	1	0	0	0	0	0	0	1	0	0	0	0	0	0	0	0	0	0	1	0	0	0	0	1	0	0	1	0	0
UPC2_1	CPAR2_207280	UPC2	upstream_gene_variant	5809	1545369	c.-1317T>G	0	0	0	0	0	0	0	0	0	0	0	0	0	0	0	0	0	0	0	0	0	0	0	0	0	0	0	0	0	0	0	0	0	0	0	0	0	0	0	0	0	0	0
UPC2_2	CPAR2_207280	UPC2	upstream_gene_variant	5809	1543005	c.-3681A>G	0	0	0	0	0	1	0	0	0	0	1	0	1	1	0	0	0	0	0	0	0	0	0	0	0	0	0	0	0	0	0	0	0	0	0	0	0	0	0	0	0	0	0
UPC2_3	CPAR2_207280	UPC2	downstream_gene_variant	5809	1550475	c.*1246A>G	0	0	0	0	0	1	0	0	0	0	1	0	0	0	0	0	0	0	0	0	0	0	0	0	0	0	0	0	0	0	0	0	0	0	0	0	0	0	0	0	0	0	0
UPC2_4	CPAR2_207280	UPC2	upstream_gene_variant	5809	1542086	c.-4600A>G	0	0	0	0	0	0	0	0	0	0	0	0	1	0	0	0	0	0	0	0	0	0	0	0	0	0	0	0	0	0	0	0	0	0	0	0	0	0	0	0	0	0	0
UPC2_5	CPAR2_207280	UPC2	downstream_gene_variant	5809	1549517	c.*298_*299insAC	0	0	0	0	0	0	0	0	0	0	0	0	0	0	0	1	0	1	1	0	0	0	1	0	0	0	0	0	0	0	0	0	0	0	0	0	0	0	0	0	0	0	0
UPC2_6	CPAR2_207280	UPC2	upstream_gene_variant	5809	1545361	c.-1325_-1324delTGinsCA	0	0	0	0	0	0	0	0	0	0	0	0	0	0	0	0	0	0	0	0	0	0	0	0	0	0	0	0	0	0	0	0	0	0	0	0	0	0	1	0	0	1	0
UPC2_7	CPAR2_207280	UPC2	upstream_gene_variant	5809	1543155	c.-3531T>C	1	1	1	0	1	1	1	0	1	1	1	1	1	1	1	0	1	0	0	1	1	1	0	1	1	1	1	1	0	1	1	1	1	1	1	1	1	1	1	1	1	1	1
UPC2_8	CPAR2_207280	UPC2	downstream_gene_variant	5809	1550014	c.*785A>G	0	0	0	0	0	0	0	0	0	0	0	0	0	0	0	0	0	0	0	0	0	0	0	0	0	0	0	0	0	0	0	0	0	0	0	0	0	0	0	0	0	0	0
UPC2_9	CPAR2_207280	UPC2	upstream_gene_variant	5809	1544892	c.-1794C>T	0	0	1	0	0	1	0	0	1	1	1	0	1	1	1	0	0	0	0	0	1	1	0	0	0	0	1	0	0	0	0	1	1	0	0	0	0	1	1	0	1	1	0
UPC2_10	CPAR2_207280	UPC2	downstream_gene_variant	5809	1552612	c.*3383A>G	1	1	0	0	1	0	0	1	0	0	0	1	0	0	0	0	1	0	0	1	0	0	0	1	1	1	0	1	0	1	1	0	0	1	1	1	1	0	0	1	0	0	1
UPC2_11	CPAR2_207280	UPC2	upstream_gene_variant	5809	1542910	c.-3776A>C	0	0	0	0	0	0	0	0	0	0	0	0	0	0	0	0	0	0	0	0	1	0	0	0	0	0	0	0	0	0	0	0	0	0	0	0	0	0	1	0	0	1	0
UPC2_12	CPAR2_207280	UPC2	upstream_gene_variant	5809	1542916	c.-3770C>A	0	0	0	0	0	0	0	0	1	1	0	0	0	0	0	0	0	0	0	0	1	0	0	0	0	0	0	0	0	0	0	0	0	0	0	0	0	0	1	0	0	1	0
UPC2_13	CPAR2_207280	UPC2	upstream_gene_variant	5809	1545289	c.-1397A>G	0	0	0	0	0	0	0	0	0	0	0	0	0	0	0	1	0	1	1	0	0	0	1	0	0	0	0	0	0	0	0	0	0	0	0	0	0	0	0	0	0	0	0
UPC2_14	CPAR2_207280	UPC2	upstream_gene_variant	5809	1544711	c.-1975C>T	0	0	0	0	0	0	0	0	0	0	0	0	0	0	0	0	0	0	0	0	0	0	0	0	0	0	0	0	0	0	0	0	0	0	0	0	0	0	0	0	0	0	0
UPC2_15	CPAR2_207280	UPC2	upstream_gene_variant	5809	1542594	c.-4092C>T	0	0	0	0	0	0	0	0	0	0	0	0	0	0	0	0	0	0	0	0	0	0	0	0	0	0	0	0	0	0	0	0	0	0	0	0	0	0	0	0	0	0	0
UPC2_16	CPAR2_207280	UPC2	downstream_gene_variant	5809	1549647	c.*418T>G	0	0	1	1	0	1	0	0	1	1	1	0	1	1	1	1	0	1	1	0	1	1	1	0	0	0	0	0	0	0	0	1	1	0	0	0	0	1	1	0	1	1	0
UPC2_17	CPAR2_207280	UPC2	upstream_gene_variant	5809	1541934	c.-4752C>T	0	0	0	0	0	0	0	0	0	0	0	0	1	1	0	0	0	0	0	0	0	0	0	0	0	0	0	0	0	0	0	0	0	0	0	0	0	0	0	0	0	0	0
UPC2_18	CPAR2_207280	UPC2	upstream_gene_variant	5809	1545971	c.-715C>A	0	0	0	0	0	0	0	0	0	0	0	0	0	0	0	0	0	0	0	0	0	0	0	0	0	0	1	0	0	0	0	0	0	0	0	0	0	0	0	0	0	0	0
UPC2_19	CPAR2_207280	UPC2	upstream_gene_variant	5809	1542867	c.-3819C>T	0	0	0	0	0	0	0	0	0	0	0	0	0	0	0	1	0	0	0	0	0	0	0	0	0	0	0	0	0	0	0	0	0	0	0	0	0	0	0	0	0	0	0
MDR1_2_1	CPAR2_500470	MDR1_2	downstream_gene_variant	6139	97677	c.*137T>C	0	0	0	0	0	0	0	0	0	0	0	0	1	0	0	0	0	0	0	0	0	0	0	0	0	0	0	0	0	0	0	0	0	0	0	0	0	0	0	0	0	0	0
MDR1_2_2	CPAR2_500470	MDR1_2	downstream_gene_variant	6139	96537	c.*1277T>C	0	0	0	0	0	1	0	0	0	0	1	0	0	0	0	0	0	0	0	0	0	0	0	0	0	0	0	0	0	0	0	0	0	0	0	0	0	0	0	0	0	0	0
MDR1_2_3	CPAR2_500470	MDR1_2	synonymous_variant	6139	98015	p.Glu804Glu/c.2412G>A	0	0	0	0	0	0	0	0	1	1	0	0	0	0	0	0	0	0	0	0	1	0	0	0	0	0	0	0	0	0	0	0	0	0	0	0	0	0	1	0	0	1	0
MDR1_2_4	CPAR2_500470	MDR1_2	synonymous_variant	6139	99980	p.Gly149Gly/c.447T>C	1	1	0	0	1	0	0	1	0	0	0	0	0	0	0	0	1	0	0	0	0	0	0	0	1	1	0	0	0	0	1	0	0	1	0	1	1	0	0	0	0	0	0
MDR1_2_5	CPAR2_500470	MDR1_2	upstream_gene_variant	6139	102508	c.-2082T>A	0	0	0	0	0	0	0	0	0	0	0	0	0	0	0	0	0	0	0	0	0	1	0	0	0	0	0	0	0	0	0	0	0	0	0	0	0	0	0	0	0	0	0
MDR1_2_6	CPAR2_500470	MDR1_2	upstream_gene_variant	6139	103560	c.-3134C>T	0	0	0	0	0	0	0	0	0	0	0	0	0	1	0	0	0	0	0	0	0	0	0	0	0	0	0	0	0	0	0	0	0	0	0	0	0	0	0	0	0	0	0
UME6_1	CPAR2_501290	UME6	upstream_gene_variant	6139	295863	c.-2626A>T	0	0	0	0	0	0	0	0	0	0	0	0	0	1	0	0	0	0	0	0	0	0	0	0	0	0	0	0	0	0	0	0	0	0	0	0	0	0	0	0	0	0	0
UME6_2	CPAR2_501290	UME6	upstream_gene_variant	6139	294138	c.-4351C>T	0	0	0	0	0	0	0	0	1	1	0	0	0	0	0	0	0	0	0	0	1	0	0	0	0	0	0	0	0	0	0	0	0	0	0	0	0	0	1	0	0	1	0
UME6_3	CPAR2_501290	UME6	upstream_gene_variant	6139	294999	c.-3477_-3476insTT	0	0	0	0	0	0	0	0	0	0	0	0	0	0	0	0	0	0	0	0	1	0	0	0	0	0	0	0	0	0	0	0	0	0	0	0	0	0	0	0	0	0	0
UME6_4	CPAR2_501290	UME6	downstream_gene_variant	6139	302632	c.*3802A>T	0	0	0	0	0	0	0	0	0	1	0	0	0	0	0	0	0	0	0	0	1	0	0	0	0	0	0	0	0	0	0	0	0	0	0	0	0	0	1	0	0	0	0
UME6_5	CPAR2_501290	UME6	upstream_gene_variant	6139	298312	c.-169delC	0	1	0	0	0	0	0	0	0	0	0	0	0	0	0	1	0	0	1	0	1	0	0	0	0	0	0	0	0	0	0	0	0	1	0	1	0	0	1	0	0	1	0
UME6_6	CPAR2_501290	UME6	upstream_gene_variant	6139	294999	c.-3477_-3476insT	0	0	0	0	0	0	0	0	0	0	0	0	0	0	0	0	0	0	0	0	0	0	0	0	0	0	0	0	0	0	0	0	0	0	0	0	0	0	0	0	0	0	0
UME6_7	CPAR2_302900	UME6	downstream_gene_variant	5806	698216	c.*760C>T	0	0	0	0	0	0	0	0	0	0	0	0	1	0	0	0	0	0	0	0	0	0	0	0	0	0	0	0	0	0	0	0	0	0	0	0	0	0	0	0	0	0	0
UME6_8	CPAR2_302900	UME6	downstream_gene_variant	5806	700649	c.*3193G>T	0	0	0	0	0	0	0	0	1	1	0	0	0	0	0	0	0	0	0	0	1	0	0	0	0	0	0	0	0	0	0	0	0	0	0	0	0	0	1	0	0	1	0
UME6_9	CPAR2_302900	UME6	upstream_gene_variant	5806	691844	c.-4702C>A	0	0	0	0	0	0	0	0	1	0	0	0	0	0	0	0	0	0	0	0	0	0	0	0	0	0	0	0	0	0	0	0	0	0	0	0	0	0	0	0	0	0	0
UME6_10	CPAR2_803820	UME6	missense_variant	5807	850237	p.Ser253Cys/c.757A>T	0	0	0	0	0	0	0	0	0	0	0	0	0	1	0	0	0	0	0	0	0	0	0	0	0	0	0	0	0	0	0	0	0	0	0	0	0	0	0	0	0	0	0
UME6_11	CPAR2_302900	UME6	downstream_gene_variant	5806	702346	c.*4890G>A	0	0	0	0	0	0	0	0	0	0	0	0	0	0	0	0	0	0	0	0	0	0	0	0	0	0	0	0	0	0	0	0	0	0	0	0	0	0	1	0	0	0	0
UME6_12	CPAR2_803820	UME6	missense_variant	5807	849355	p.Cys547Gly/c.1639T>G	0	0	1	1	0	1	0	0	1	1	1	0	1	1	0	1	0	1	1	0	1	0	1	0	0	0	0	0	0	0	0	0	0	0	0	0	0	0	1	0	0	1	0
UME6_13	CPAR2_803820	UME6	upstream_gene_variant	5807	851526	c.-533T>C	0	0	0	0	0	0	0	0	0	0	0	0	0	0	0	0	0	0	0	0	0	0	1	0	0	0	0	0	0	0	0	0	0	0	0	0	0	0	0	0	0	0	0
UME6_14	CPAR2_803820	UME6	upstream_gene_variant	5807	855475	c.-4482A>G	0	0	1	1	0	1	0	0	1	1	1	0	1	1	1	1	0	1	1	0	1	1	1	0	0	0	0	0	0	0	0	0	1	0	0	0	0	1	1	0	1	1	0
UME6_15	CPAR2_302900	UME6	synonymous_variant	5806	697279	p.Ser222Ser/c.666G>T	0	0	1	0	0	0	0	0	0	0	0	0	0	0	0	0	0	0	0	0	0	0	0	0	0	0	0	0	0	0	0	1	0	0	0	0	0	0	0	0	0	0	0
UME6_16	CPAR2_803820	UME6	downstream_gene_variant	5807	848239	c.*319C>T	0	0	0	1	0	0	0	0	0	0	0	0	0	0	0	1	0	0	1	0	0	0	1	0	0	0	0	0	0	0	0	0	0	0	0	0	0	0	0	0	0	0	0
UME6_17	CPAR2_302900	UME6	downstream_gene_variant	5806	701259	c.*3803G>A	0	0	0	0	0	0	0	0	0	0	0	0	0	0	0	0	0	0	0	0	0	0	0	0	0	0	0	0	0	0	0	0	0	0	0	0	0	0	1	0	0	1	0
UME6_18	CPAR2_501290	UME6	upstream_gene_variant	6139	295806	c.-2683T>C	0	0	0	0	0	0	0	0	0	0	0	0	0	0	0	0	0	0	0	0	0	0	0	0	0	0	0	0	0	0	0	0	0	0	0	0	0	0	0	0	0	0	0
UME6_19	CPAR2_302900	UME6	upstream_gene_variant	5806	693760	c.-2786G>A	0	0	0	1	0	0	0	0	0	0	0	0	0	0	0	1	0	1	1	0	0	0	1	0	0	0	0	0	0	0	0	0	0	0	0	0	0	0	0	0	0	0	0
UME6_20	CPAR2_302900	UME6	downstream_gene_variant	5806	699813	c.*2357A>G	0	0	0	0	0	0	0	0	0	0	0	0	0	0	0	0	0	0	0	0	0	0	0	0	0	0	0	0	0	0	0	0	0	0	0	0	0	0	0	0	0	0	0
UME6_21	CPAR2_803820	UME6	upstream_gene_variant	5807	851714	c.-733delT	0	0	0	0	0	0	0	0	0	0	0	0	1	0	0	0	0	0	0	0	0	0	0	0	0	0	0	0	0	0	0	0	0	0	0	0	0	0	0	0	0	0	0
UME6_22	CPAR2_803820	UME6	downstream_gene_variant	5807	848525	c.*33A>T	0	0	0	0	0	0	0	0	0	0	0	0	1	1	0	0	0	0	0	0	0	0	0	0	0	0	0	0	0	0	0	0	0	0	0	0	0	0	0	0	0	0	0
UME6_23	CPAR2_803820	UME6	downstream_gene_variant	5807	844255	c.*4303C>T	0	0	0	0	0	0	0	0	1	1	0	0	0	0	0	0	0	0	0	0	1	0	0	0	0	0	0	0	0	0	0	0	0	0	0	0	0	0	1	0	0	1	0
UME6_24	CPAR2_803820	UME6	downstream_gene_variant	5807	847781	c.*777T>C	0	0	0	0	0	0	0	0	0	0	0	0	0	0	0	0	0	0	0	0	1	0	0	0	0	0	0	0	0	0	0	0	0	0	0	0	0	0	0	0	0	0	0
UME6_25	CPAR2_302900	UME6	missense_variant	5806	696884	p.Ser91Pro/c.271T>C	0	0	0	0	0	1	0	0	0	0	1	0	1	1	0	0	0	0	0	0	0	0	0	0	0	0	0	0	0	0	0	0	0	0	0	0	0	0	0	0	0	0	0
UME6_26	CPAR2_803820	UME6	downstream_gene_variant	5807	848146	c.*412T>G	0	0	0	0	0	0	0	0	1	1	0	0	0	0	0	0	0	0	0	0	1	0	0	0	0	0	0	0	0	0	0	0	0	0	0	0	0	0	1	0	0	1	0
UME6_27	CPAR2_803820	UME6	upstream_gene_variant	5807	851009	c.-16T>C	0	0	0	0	0	0	0	0	0	0	0	0	0	0	0	0	0	0	0	0	0	0	0	0	0	0	0	0	0	0	0	0	0	0	0	0	0	0	0	0	0	0	0
UME6_28	CPAR2_803820	UME6	missense_variant	5807	850857	p.Thr46Lys/c.137C>A	1	1	0	0	1	0	0	1	0	0	0	1	0	0	0	0	1	0	0	1	0	0	0	1	1	1	0	1	0	1	1	0	0	1	1	1	1	0	0	1	0	0	1
UME6_29	CPAR2_803820	UME6	downstream_gene_variant	5807	843865	c.*4693A>G	0	0	1	0	0	0	0	0	0	0	1	0	1	1	0	0	0	0	0	0	0	0	0	0	0	0	0	0	0	0	0	1	0	0	0	0	0	0	0	0	0	0	0
UME6_30	CPAR2_501290	UME6	upstream_gene_variant	6139	295838	c.-2651T>C	0	0	0	0	0	1	0	0	0	0	1	0	0	0	0	0	0	0	0	0	0	0	0	0	0	0	0	0	0	0	0	0	0	0	0	0	0	0	0	0	0	0	0
UME6_31	CPAR2_501290	UME6	downstream_gene_variant	6139	300862	c.*2032T>C	0	0	0	0	0	1	0	0	0	0	1	0	0	0	0	0	0	0	0	0	0	0	0	0	0	0	0	0	0	0	0	0	0	0	0	0	0	0	0	0	0	0	0
UME6_32	CPAR2_803820	UME6	downstream_gene_variant	5807	846371	c.*2187G>T	0	0	0	0	0	0	0	0	0	0	0	0	1	0	0	0	0	0	0	0	0	0	0	0	0	0	0	0	0	0	0	0	0	0	0	0	0	0	0	0	0	0	0
UME6_33	CPAR2_302900	UME6	downstream_gene_variant	5806	701673	c.*4217G>A	0	0	1	0	0	0	0	0	0	0	0	0	0	0	0	0	0	0	0	0	0	0	0	0	0	0	0	0	0	0	0	0	0	0	0	0	0	0	0	0	0	0	0
UME6_34	CPAR2_302900	UME6	upstream_gene_variant	5806	693489	c.-3057_-3056delGGinsAA	0	0	1	0	0	0	0	0	0	0	0	0	0	0	0	0	0	0	0	0	0	0	0	0	0	0	0	0	0	0	0	0	0	0	0	0	0	0	0	0	0	0	0
UME6_35	CPAR2_803820	UME6	missense_variant	5807	850858	p.Thr46Ala/c.136A>G	0	0	0	0	0	0	0	0	1	1	0	0	0	0	0	0	0	0	0	0	1	0	0	0	0	0	0	0	0	0	0	0	0	0	0	0	0	0	1	0	0	1	0
UME6_36	CPAR2_803820	UME6	downstream_gene_variant	5807	848170	c.*388A>G	1	1	0	1	0	0	0	0	1	0	0	0	0	0	0	1	0	1	1	0	1	1	1	1	1	0	0	0	0	0	0	0	1	0	0	1	1	1	1	1	1	1	0
CDR1b_1	CPAR2_603800	CDR1b	synonymous_variant	5504	892981	p.Leu1199Leu/c.3597A>G	0	0	1	0	0	1	0	0	1	1	0	0	1	1	0	1	0	1	1	0	1	0	1	0	0	0	0	0	0	0	0	0	0	0	0	0	0	0	0	0	0	1	0
CDR1b_2	CPAR2_603800	CDR1b	downstream_gene_variant	5504	891682	c.*396G>A	0	0	0	0	0	0	0	0	0	0	0	0	0	0	0	0	0	0	0	0	0	0	0	0	0	0	0	0	0	0	0	0	0	0	0	0	0	0	1	0	0	0	0
CDR1b_3	CPAR2_603800	CDR1b	synonymous_variant	5504	892168	p.Val1470Val/c.4410C>T	0	0	0	0	0	1	0	0	0	0	1	0	0	0	0	0	0	0	0	0	0	0	0	0	0	0	0	0	0	0	0	0	0	0	0	0	0	0	0	0	0	0	0
CDR1b_4	CPAR2_603800	CDR1b	synonymous_variant	5504	894913	p.556/c.1662_1665delGTCGinsATCA	1	1	0	0	1	0	0	1	0	0	0	1	0	0	0	0	1	0	0	1	0	0	0	1	1	1	0	0	0	1	1	0	0	1	1	1	1	0	0	1	0	0	1
CDR1b_5	CPAR2_603800	CDR1b	synonymous_variant	5504	894922	p.Ala552Ala/c.1656G>A	1	1	0	0	1	0	0	1	0	0	0	1	0	0	0	0	1	0	0	1	0	0	0	1	1	1	0	1	0	1	1	0	0	1	1	1	1	0	0	1	0	0	1
CDR1b_6	CPAR2_603800	CDR1b	synonymous_variant	5504	894316	p.His754His/c.2262C>T	0	0	1	1	0	1	0	0	1	1	1	0	1	1	0	1	0	1	1	0	1	0	1	0	0	0	0	0	0	0	0	1	0	0	0	0	0	0	1	0	0	1	0
CDR1b_7	CPAR2_603800	CDR1b	synonymous_variant	5504	892948	p.Ser1210Ser/c.3630G>A	0	0	1	1	0	1	0	0	1	1	0	0	1	1	0	1	0	1	1	0	1	0	1	0	0	0	0	0	0	0	0	1	0	0	0	0	0	0	0	0	0	1	0
CDR1b_8	CPAR2_603800	CDR1b	downstream_gene_variant	5504	891244	c.*834T>C	0	0	0	0	0	0	0	0	0	0	0	0	0	0	0	0	0	0	0	0	1	0	0	0	0	0	0	0	0	0	0	0	0	0	0	0	0	0	1	0	0	1	0
CDR1b_9	CPAR2_603800	CDR1b	missense_variant	5504	892357	p.Asp1407Glu/c.4221T>A	0	0	0	0	0	0	0	0	0	0	0	0	0	0	0	0	0	0	0	0	0	1	0	0	0	0	0	0	0	0	0	0	0	0	0	0	0	1	0	0	0	0	0
CDR1b_10	CPAR2_603800	CDR1b	downstream_gene_variant	5504	887929	c.*4149G>A	0	0	0	0	0	0	0	0	0	0	0	0	0	0	0	0	0	0	0	0	0	0	0	0	0	0	0	0	0	0	0	0	0	0	0	0	0	0	0	0	0	0	0
CDR1b_11	CPAR2_603800	CDR1b	synonymous_variant	5504	895774	p.Ala268Ala/c.804A>C	0	0	0	0	0	0	0	0	0	0	0	0	0	0	0	0	0	0	0	0	0	0	0	0	0	0	0	0	0	0	0	0	0	0	0	0	0	0	0	0	0	0	0
CDR1b_12	CPAR2_603800	CDR1b	synonymous_variant	5504	894505	p.Phe691Phe/c.2073T>C	0	0	0	0	0	0	0	0	0	0	0	0	0	0	0	0	0	0	0	0	0	0	0	0	0	0	0	0	1	0	0	0	0	0	0	0	0	0	0	0	0	0	0
CDR1b_13	CPAR2_603800	CDR1b	downstream_gene_variant	5504	891890	c.*188C>T	0	0	0	0	0	0	0	0	0	0	0	0	0	0	0	0	0	0	0	0	0	0	0	0	0	0	1	0	0	0	0	0	0	0	0	0	0	0	0	0	0	0	0
CDR1b_14	CPAR2_603800	CDR1b	downstream_gene_variant	5504	891874	c.*204C>T	0	0	0	0	0	0	0	0	0	0	0	0	0	0	0	0	0	0	0	0	0	0	0	0	0	0	0	0	0	0	0	0	0	0	0	0	0	0	0	0	0	0	0
CDR1b_15	CPAR2_603800	CDR1b	downstream_gene_variant	5504	887434	c.*4644T>C	0	0	0	0	0	0	0	0	0	0	0	0	0	0	0	0	0	0	0	0	0	0	0	0	0	0	1	0	0	0	0	0	0	0	0	0	0	0	0	0	0	0	0
CDR1b_16	CPAR2_603800	CDR1b	downstream_gene_variant	5504	890503	c.*1575C>T	0	0	0	0	0	0	0	0	1	1	0	0	0	0	0	0	0	0	0	0	1	0	0	0	0	0	0	0	0	0	0	0	0	0	0	0	0	0	1	0	0	1	0
CDR1b_17	CPAR2_603800	CDR1b	synonymous_variant	5504	892744	p.Pro1278Pro/c.3834G>A	0	0	0	0	0	1	0	0	0	0	1	0	0	0	0	0	0	0	0	0	0	0	0	0	0	0	0	0	0	0	0	0	0	0	0	0	0	0	0	0	0	0	0
CDR1b_18	CPAR2_603800	CDR1b	synonymous_variant	5504	894256	p.Ile774Ile/c.2322T>C	0	0	0	1	0	0	0	0	1	0	1	0	1	0	0	1	0	1	1	0	1	0	1	0	0	0	0	0	0	0	0	0	0	0	0	0	0	0	1	0	0	1	0
CDR1b_19	CPAR2_603800	CDR1b	missense_variant	5504	894280	p.Val766Ala/c.2292_2298delGTTTGTTinsATTCGCG	0	0	0	0	0	0	0	0	1	0	0	0	1	0	0	1	0	1	1	0	1	0	1	0	0	0	0	0	0	0	0	0	0	0	0	0	0	0	1	0	0	1	0
CDR1b_20	CPAR2_603800	CDR1b	missense_variant	5504	894170	p.Lys803Arg/c.2408A>G	0	0	0	0	0	0	0	0	0	0	0	0	0	0	0	0	0	0	0	0	0	1	0	0	0	0	0	0	0	0	0	0	0	0	0	0	0	1	0	0	0	0	0
CDR1b_21	CPAR2_603800	CDR1b	missense_variant	5504	894295	p.Trp759Phe/c.2276_2283delGGGGAATTinsTTGGTATC	0	0	0	1	0	0	0	0	1	0	0	0	1	0	0	1	0	1	1	0	1	0	1	0	0	0	0	0	0	0	0	0	0	0	0	0	0	0	1	0	0	1	0
CDR1b_22	CPAR2_603800	CDR1b	synonymous_variant	5504	892966	p.1205/c.3609_3612delAGCGinsGGCT	0	0	1	0	0	1	0	0	1	1	0	0	1	1	0	1	0	1	1	0	1	0	1	0	0	0	0	0	0	0	0	0	0	0	0	0	0	0	0	0	0	1	0
CDR1b_23	CPAR2_603800	CDR1b	missense_variant	5504	895424	p.Ala385Val/c.1154C>T	0	0	0	0	0	0	0	0	0	0	0	0	1	0	0	0	0	0	0	0	0	0	0	0	0	0	0	0	0	0	0	0	0	0	0	0	0	0	0	0	0	0	0
FLO8_1	CPAR2_601080	FLO8	missense_variant	5504	288499	p.Gly1052Ser/c.3154G>A	0	0	1	1	0	1	0	0	1	1	1	0	1	1	0	1	0	1	1	0	1	0	1	0	0	0	0	0	0	0	0	1	0	0	0	0	0	0	1	0	0	1	0
FLO8_2	CPAR2_601080	FLO8	downstream_gene_variant	5504	292706	c.*3941T>C	1	1	1	1	1	1	1	1	1	1	1	1	1	1	1	1	1	1	1	1	1	1	1	1	1	1	1	1	0	1	1	1	1	1	1	1	1	1	1	1	1	1	1
FLO8_3	CPAR2_601080	FLO8	conservative_inframe_insertion	5504	287832	p.Ser832dup/c.2494_2496dupTCA	0	0	0	0	0	0	0	0	0	0	0	0	0	0	0	0	0	0	0	0	1	0	0	0	0	0	0	0	0	0	0	0	0	0	0	0	0	0	0	0	0	0	0
FLO8_4	CPAR2_601080	FLO8	synonymous_variant	5504	288114	p.Asn923Asn/c.2769C>T	0	0	1	1	0	1	1	0	1	1	1	0	1	1	1	1	0	1	1	0	1	1	1	0	0	0	0	0	0	0	0	1	1	0	0	0	0	1	1	0	1	1	0
FLO8_5	CPAR2_601080	FLO8	upstream_gene_variant	5504	281300	c.-4046C>T	0	0	0	0	0	0	0	0	0	0	0	0	0	0	0	0	0	0	0	0	0	0	0	0	0	0	0	0	0	0	0	0	0	0	0	0	0	0	0	0	0	0	0
FLO8_6	CPAR2_601080	FLO8	downstream_gene_variant	5504	292585	c.*3820T>A	0	0	0	0	0	0	0	0	0	0	0	0	0	0	0	1	0	0	0	0	0	0	0	0	0	0	0	0	0	0	0	0	0	0	0	0	0	0	0	0	0	0	0
ARR3_1	CPAR2_601050	ARR3	downstream_gene_variant	5504	288114	c.*3751C>T	0	0	1	1	0	1	1	0	1	1	1	0	1	1	1	1	0	1	1	0	1	1	1	0	0	0	0	0	0	0	0	1	1	0	0	0	0	1	1	0	1	1	0
ARR3_2	CPAR2_601050	ARR3	upstream_gene_variant	5504	279507	c.-3525A>G	0	0	0	0	0	0	0	0	0	0	0	0	0	0	0	0	0	0	0	0	0	0	0	0	0	0	0	0	0	0	0	0	0	0	0	0	0	0	0	0	0	0	0
ARR3_3	CPAR2_601050	ARR3	downstream_gene_variant	5504	287832	c.*3476_*3478dupTCA	0	0	0	0	0	0	0	0	0	0	0	0	0	0	0	0	0	0	0	0	1	0	0	0	0	0	0	0	0	0	0	0	0	0	0	0	0	0	0	0	0	0	0
ARR3_4	CPAR2_601050	ARR3	upstream_gene_variant	5504	279691	c.-3341G>A	0	0	0	0	0	0	0	0	0	0	0	0	0	0	0	0	0	0	0	0	0	0	0	0	0	0	0	0	0	0	0	1	0	0	0	0	0	0	0	0	0	0	0
ARR3_5	CPAR2_601050	ARR3	upstream_gene_variant	5504	280286	c.-2746A>G	0	0	0	0	0	0	0	0	0	0	0	0	0	0	1	0	0	0	0	0	0	1	0	0	0	0	0	0	0	0	0	0	1	0	0	0	0	1	0	0	1	0	0
ARR3_6	CPAR2_601050	ARR3	upstream_gene_variant	5504	279489	c.-3543A>G	0	0	0	0	0	0	0	0	1	0	0	0	0	0	0	0	0	0	0	0	1	0	0	0	0	0	0	0	0	0	0	0	0	0	0	0	0	0	0	0	0	0	0
ARR3_7	CPAR2_601050	ARR3	upstream_gene_variant	5504	281300	c.-1732C>T	0	0	0	0	0	0	0	0	0	0	0	0	0	0	0	0	0	0	0	0	0	0	0	0	0	0	0	0	0	0	0	0	0	0	0	0	0	0	0	0	0	0	0
ARR3_8	CPAR2_601050	ARR3	downstream_gene_variant	5504	288499	c.*4136G>A	0	0	1	1	0	1	0	0	1	1	1	0	1	1	0	1	0	1	1	0	1	0	1	0	0	0	0	0	0	0	0	1	0	0	0	0	0	0	1	0	0	1	0
CDR2_1	CPAR2_401370	CDR2	downstream_gene_variant	6372	291254	c.*3786C>T	0	0	0	0	0	0	0	0	0	0	0	0	0	0	0	0	0	0	0	0	0	0	0	0	0	0	0	0	0	0	0	0	0	0	0	0	0	0	0	0	0	0	0
CDR2_2	CPAR2_401370	CDR2	downstream_gene_variant	6372	290418	c.*4622T>C	0	0	1	1	0	1	1	0	1	1	1	0	1	1	1	1	0	1	1	0	1	1	1	0	0	0	1	0	0	0	0	1	1	0	0	0	0	1	1	0	1	1	0
CDR2_3	CPAR2_401370	CDR2	downstream_gene_variant	6372	294020	c.*1020G>A	0	0	0	0	0	0	0	0	1	0	0	0	0	0	0	0	0	0	0	0	0	0	0	0	0	0	0	0	0	0	0	0	0	0	0	0	0	0	0	0	0	0	0
CDR2_4	CPAR2_401370	CDR2	downstream_gene_variant	6372	291103	c.*3937G>A	0	0	0	1	0	0	0	0	0	0	0	0	0	0	0	1	0	1	1	0	0	0	1	0	0	0	0	0	0	0	0	0	0	0	0	0	0	0	0	0	0	0	0
CDR2_5	CPAR2_401370	CDR2	downstream_gene_variant	6372	291230	c.*3810T>C	0	0	1	1	0	1	0	0	1	1	1	0	1	1	0	1	0	1	1	0	1	0	1	0	0	0	0	0	0	0	0	1	0	0	0	0	0	0	1	0	0	1	0
CDR2_6	CPAR2_401370	CDR2	downstream_gene_variant	6372	291851	c.*3186_*3187insTT	0	0	0	1	0	0	0	0	1	1	1	0	1	0	0	1	0	1	1	0	1	1	1	0	0	0	0	0	0	0	0	0	1	0	0	0	0	1	1	0	1	1	0
CDR2_7	CPAR2_401370	CDR2	downstream_gene_variant	6372	294819	c.*221G>A	0	0	0	1	0	0	0	0	0	0	0	0	0	0	0	1	0	1	1	0	0	0	1	0	0	0	0	0	0	0	0	0	0	0	0	0	0	0	0	0	0	0	0
CDR2_8	CPAR2_401370	CDR2	downstream_gene_variant	6372	294891	c.*149A>G	0	0	0	0	0	0	0	0	0	0	0	0	0	0	0	0	0	0	1	0	0	0	0	0	0	0	0	0	0	0	0	0	0	0	0	0	0	0	0	0	0	0	0
CDR2_9	CPAR2_401370	CDR2	downstream_gene_variant	6372	291047	c.*3993T>A	0	0	0	0	0	0	0	0	0	0	0	0	0	0	0	0	0	0	0	0	0	0	0	0	0	0	0	0	0	0	0	0	0	0	0	0	0	0	0	0	0	0	0
CDR2_10	CPAR2_401370	CDR2	downstream_gene_variant	6372	292475	c.*2565A>G	0	0	0	0	0	0	0	0	0	0	0	0	0	0	0	0	0	0	0	0	0	0	0	0	0	0	1	0	0	0	0	0	0	0	0	0	0	0	0	0	0	0	0
CDR2_11	CPAR2_401370	CDR2	downstream_gene_variant	6372	291943	c.*3097G>A	0	0	0	0	0	0	0	0	0	0	0	0	0	0	0	0	0	0	0	0	0	1	0	0	0	0	0	0	0	0	0	0	0	0	0	0	0	0	0	0	0	0	0
CDR2_12	CPAR2_401370	CDR2	downstream_gene_variant	6372	292272	c.*2768T>C	0	0	0	0	0	0	0	0	0	0	0	0	0	0	1	0	0	0	0	0	0	1	0	0	0	0	0	0	0	0	0	0	1	0	0	0	0	1	0	0	1	0	0
CDR2_13	CPAR2_401370	CDR2	upstream_gene_variant	6372	299791	c.-4518T>G	1	1	0	0	1	0	0	1	0	0	0	1	0	0	0	0	1	0	0	1	0	0	0	1	1	1	0	0	0	1	0	0	0	1	1	1	1	0	0	1	0	0	1
CDR2_14	CPAR2_401370	CDR2	downstream_gene_variant	6372	292444	c.*2596T>G	0	0	0	0	0	0	0	0	0	0	0	0	0	0	0	0	0	0	0	0	0	0	0	0	0	0	0	0	0	0	0	0	0	0	0	0	0	0	0	0	0	0	0
GZF3_1	CPAR2_800210	GZF3	upstream_gene_variant	5807	44129	c.-4737A>G	0	0	0	0	0	0	0	0	0	0	0	0	0	0	0	0	0	0	0	0	0	0	0	0	0	0	1	0	0	0	0	0	0	0	0	0	0	0	0	0	0	0	0
GZF3_2	CPAR2_800210	GZF3	upstream_gene_variant	5807	44720	c.-4146C>T	0	0	0	0	0	1	0	0	0	0	1	0	0	0	0	0	0	0	0	0	0	0	0	0	0	0	0	0	0	0	0	0	0	0	0	0	0	0	0	0	0	0	0
GZF3_3	CPAR2_800210	GZF3	upstream_gene_variant	5807	48064	c.-802T>A	0	0	0	0	0	0	0	0	0	0	0	0	0	0	0	0	0	0	0	0	0	0	0	0	0	0	0	0	0	0	0	0	0	0	0	0	0	0	0	0	0	0	0
GZF3_4	CPAR2_800210	GZF3	downstream_gene_variant	5807	55317	c.*3809T>C	0	0	0	0	0	0	0	0	0	0	0	0	0	0	0	0	0	0	0	0	0	0	0	0	0	0	0	0	0	0	0	0	0	0	0	0	0	0	1	0	0	0	0
GZF3_5	CPAR2_800210	GZF3	upstream_gene_variant	5807	47317	c.-1549G>A	0	0	1	0	0	1	0	0	0	0	1	0	1	1	0	0	0	0	0	0	0	0	0	0	0	0	0	0	0	0	0	0	0	0	0	0	0	0	0	0	0	0	0
GZF3_6	CPAR2_800210	GZF3	upstream_gene_variant	5807	44035	c.-4831T>C	0	0	0	0	0	0	0	0	0	0	0	0	0	0	0	0	0	0	0	0	0	0	0	0	0	0	0	0	0	0	0	0	0	0	0	0	0	0	0	0	0	0	0
GZF3_7	CPAR2_800210	GZF3	downstream_gene_variant	5807	53033	c.*1525C>T	0	0	0	0	0	0	0	0	0	0	0	0	0	0	0	0	0	0	0	0	1	0	0	0	0	0	0	0	0	0	0	0	0	0	0	0	0	0	0	0	0	0	0
GZF3_8	CPAR2_800210	GZF3	upstream_gene_variant	5807	48237	c.-629A>T	0	0	0	0	0	0	0	0	0	0	0	0	0	0	0	0	0	0	0	0	0	0	0	0	0	0	0	0	0	0	0	0	0	0	0	0	0	0	0	0	0	0	0
GZF3_9	CPAR2_800210	GZF3	upstream_gene_variant	5807	47862	c.-1004G>A	0	0	0	0	0	1	0	0	0	0	1	0	1	1	0	0	0	0	0	0	0	0	0	0	0	0	0	0	0	0	0	0	0	0	0	0	0	0	0	0	0	0	0
GZF3_10	CPAR2_800210	GZF3	upstream_gene_variant	5807	47730	c.-1129delG	0	0	0	1	0	0	0	0	0	0	0	0	0	0	0	1	0	1	1	0	0	0	1	0	0	0	0	0	0	0	0	0	0	0	0	0	0	0	0	0	0	0	0
GZF3_11	CPAR2_800210	GZF3	downstream_gene_variant	5807	54351	c.*2843C>G	0	0	1	1	0	1	0	0	1	1	1	0	1	0	1	1	0	1	1	0	1	0	1	0	0	0	0	0	0	0	0	1	1	0	0	0	0	0	1	0	1	1	0
GZF3_12	CPAR2_800210	GZF3	upstream_gene_variant	5807	47907	c.-946_-945delGT	1	1	0	0	1	0	0	0	0	0	0	1	0	0	0	0	1	0	0	1	0	0	0	1	1	0	0	0	0	0	0	0	0	0	0	0	0	0	0	0	0	0	1
GZF3_13	CPAR2_800210	GZF3	downstream_gene_variant	5807	53656	c.*2148T>C	0	0	1	1	0	1	0	0	1	1	1	0	1	1	1	1	0	1	1	0	1	1	1	0	0	0	0	0	0	0	0	1	1	0	0	0	0	1	1	0	1	1	0
GZF3_14	CPAR2_800210	GZF3	upstream_gene_variant	5807	47985	c.-873delA	0	0	0	0	0	0	0	0	0	0	0	0	0	0	1	0	0	0	0	0	0	1	0	0	0	0	0	0	0	0	0	0	1	0	0	0	0	1	0	0	1	0	0
GZF3_15	CPAR2_800210	GZF3	downstream_gene_variant	5807	54090	c.*2582G>A	0	0	0	0	0	0	0	0	0	0	0	0	0	0	1	0	0	0	0	0	0	1	0	0	0	0	0	0	0	0	0	0	1	0	0	0	0	1	0	0	1	0	0
GZF3_16	CPAR2_800210	GZF3	upstream_gene_variant	5807	47909	c.-957T>A	0	0	0	1	0	0	1	0	1	1	0	0	0	0	0	1	0	1	0	0	1	0	1	0	0	0	0	0	0	0	0	0	0	0	0	0	0	0	1	0	0	0	0
LIP1_1	CPAR2_703190	LIP1	upstream_gene_variant	6110	679719	c.-4875C>T	0	0	0	0	0	0	1	0	0	0	0	0	0	0	0	0	0	0	0	0	0	0	0	0	0	0	0	0	0	0	0	0	0	0	0	0	0	0	0	0	0	0	0
LIP1_2	CPAR2_703190	LIP1	upstream_gene_variant	6110	681871	c.-2723C>T	0	0	1	0	0	0	0	0	0	0	0	0	0	0	0	0	0	0	0	0	0	0	0	0	0	0	0	0	0	0	0	1	0	0	0	0	0	0	0	0	0	0	0
LIP1_3	CPAR2_703190	LIP1	downstream_gene_variant	6110	687484	c.*1493_*1496delGTTTinsATTG	0	0	0	0	0	0	0	0	0	0	0	0	0	0	1	0	0	0	0	0	0	0	0	0	0	0	0	0	0	0	0	0	0	0	0	0	0	0	0	0	0	0	0
LIP1_4	CPAR2_703190	LIP1	downstream_gene_variant	6110	687489	c.*1498G>A	0	0	0	0	0	0	0	0	0	0	0	0	0	0	0	0	0	0	0	0	0	0	0	0	0	0	0	0	0	0	0	0	0	0	0	0	0	0	1	0	0	1	0
LIP1_5	CPAR2_703190	LIP1	upstream_gene_variant	6110	680743	c.-3845_-3843delGAA	0	0	0	0	0	0	0	0	0	0	0	0	0	0	0	0	0	0	0	0	1	0	0	0	0	0	0	0	0	0	0	0	0	0	0	0	0	0	1	0	0	1	0
LIP1_6	CPAR2_703190	LIP1	downstream_gene_variant	6110	689663	c.*3678_*3680delATT	0	0	1	0	0	0	0	0	0	0	0	0	0	0	0	0	0	0	0	0	0	0	0	0	0	0	0	0	0	0	0	0	0	0	0	0	0	0	0	0	0	0	0
LIP1_7	CPAR2_703190	LIP1	downstream_gene_variant	6110	686166	c.*175G>A	0	0	1	0	0	0	0	0	0	0	0	0	0	0	0	0	0	0	0	0	0	0	0	0	0	0	0	0	0	0	0	0	0	0	0	0	0	0	0	0	0	0	0
LIP1_8	CPAR2_703190	LIP1	synonymous_variant	6110	685163	p.Val190Val/c.570T>C	0	0	0	0	0	0	0	0	1	0	0	0	0	0	0	0	0	0	0	0	1	0	0	0	0	0	0	0	0	0	0	0	0	0	0	0	0	0	0	0	0	0	0
LIP1_9	CPAR2_703190	LIP1	downstream_gene_variant	6110	687991	c.*2000C>T	0	0	0	0	0	1	0	0	0	0	1	0	0	0	0	0	0	0	0	0	0	0	0	0	0	0	0	0	0	0	0	0	0	0	0	0	0	0	0	0	0	0	0
LIP1_10	CPAR2_703190	LIP1	downstream_gene_variant	6110	686625	c.*634G>T	0	0	0	0	0	0	0	0	0	0	0	0	0	0	0	0	0	0	0	0	0	0	0	0	0	0	0	0	0	0	0	0	0	0	0	0	0	0	0	0	0	0	0
LIP1_11	CPAR2_703190	LIP1	missense_variant	6110	684928	p.Cys112Phe/c.335G>T	0	0	0	0	0	0	0	0	0	0	0	0	1	0	0	0	0	0	0	0	0	0	0	0	0	0	0	0	0	0	0	0	0	0	0	0	0	0	0	0	0	0	0
LIP1_12	CPAR2_703190	LIP1	upstream_gene_variant	6110	683821	c.-773C>T	0	0	0	0	0	0	0	0	0	0	0	0	1	0	0	0	0	0	0	0	0	0	0	0	0	0	0	0	0	0	0	0	0	0	0	0	0	0	0	0	0	0	0
LIP1_13	CPAR2_703190	LIP1	downstream_gene_variant	6110	689270	c.*3279G>C	0	0	1	1	0	1	0	0	1	1	1	0	1	1	0	1	0	1	1	0	1	0	1	0	0	0	0	0	0	0	0	1	0	0	0	0	0	0	1	0	0	1	0
LIP1_14	CPAR2_703190	LIP1	upstream_gene_variant	6110	683337	c.-1257C>A	0	0	0	0	0	0	0	0	0	0	0	0	1	0	0	0	0	0	0	0	0	0	0	0	0	0	0	0	0	0	0	0	0	0	0	0	0	0	0	0	0	0	0
LIP1_15	CPAR2_703190	LIP1	upstream_gene_variant	6110	681993	c.-2601T>C	0	0	0	0	0	0	0	0	0	0	0	0	1	1	0	0	0	0	0	0	0	0	0	0	0	0	0	0	0	0	0	0	0	0	0	0	0	0	0	0	0	0	0
LIP1_16	CPAR2_703190	LIP1	upstream_gene_variant	6110	680853	c.-3741A>G	0	0	1	1	0	1	0	0	1	1	1	0	1	1	1	1	0	1	1	0	1	1	1	0	0	0	0	0	0	0	0	1	1	0	0	0	0	1	1	0	1	1	0
LIP1_17	CPAR2_703190	LIP1	upstream_gene_variant	6110	680415	c.-4179C>G	1	1	1	1	1	1	1	1	1	1	1	1	1	1	1	1	1	1	1	1	1	1	1	1	1	1	1	1	1	1	1	1	1	1	1	1	1	1	1	1	1	1	1
LIP1_18	CPAR2_703190	LIP1	upstream_gene_variant	6110	680122	c.-4472G>A	0	0	0	0	0	0	0	0	0	0	0	0	0	0	0	0	0	0	0	0	0	0	0	0	0	0	0	0	0	0	0	0	0	0	0	0	0	0	0	0	0	0	0
LIP1_19	CPAR2_703190	LIP1	downstream_gene_variant	6110	686758	c.*767T>A	0	0	0	0	0	0	0	0	0	0	0	0	0	0	0	0	0	0	0	0	0	0	0	0	0	0	0	0	0	0	0	0	0	1	0	0	0	0	0	0	0	0	0
LIP1_20	CPAR2_703190	LIP1	upstream_gene_variant	6110	684198	c.-396C>T	0	0	0	0	0	0	0	0	0	0	0	0	0	0	0	0	0	0	0	0	0	0	0	0	0	0	0	0	0	0	0	0	0	0	0	0	0	0	0	0	0	0	0
LIP2_1	CPAR2_703200	LIP2	upstream_gene_variant	6110	691339	c.-3613A>C	0	0	0	0	0	0	0	0	0	0	0	0	1	0	0	0	0	0	0	0	0	0	0	0	0	0	0	0	0	0	0	0	0	0	0	0	0	0	0	0	0	0	0
LIP2_2	CPAR2_703200	LIP2	upstream_gene_variant	6110	687991	c.-265G>A	0	0	0	0	0	1	0	0	0	0	1	0	0	0	0	0	0	0	0	0	0	0	0	0	0	0	0	0	0	0	0	0	0	0	0	0	0	0	0	0	0	0	0
LIP2_3	CPAR2_703200	LIP2	downstream_gene_variant	6110	683337	c.*2992G>T	0	0	0	0	0	0	0	0	0	0	0	0	1	0	0	0	0	0	0	0	0	0	0	0	0	0	0	0	0	0	0	0	0	0	0	0	0	0	0	0	0	0	0
LIP2_4	CPAR2_703200	LIP2	downstream_gene_variant	6110	683821	c.*2508G>A	0	0	0	0	0	0	0	0	0	0	0	0	1	0	0	0	0	0	0	0	0	0	0	0	0	0	0	0	0	0	0	0	0	0	0	0	0	0	0	0	0	0	0
LIP2_5	CPAR2_703200	LIP2	downstream_gene_variant	6110	684198	c.*2131G>A	0	0	0	0	0	0	0	0	0	0	0	0	0	0	0	0	0	0	0	0	0	0	0	0	0	0	0	0	0	0	0	0	0	0	0	0	0	0	0	0	0	0	0
LIP2_6	CPAR2_703200	LIP2	upstream_gene_variant	6110	692115	c.-4389C>A	0	0	0	0	0	1	0	0	0	0	1	0	0	0	0	0	0	0	0	0	0	0	0	0	0	0	0	0	0	0	0	0	0	0	0	0	0	0	0	0	0	0	0
LIP2_7	CPAR2_703200	LIP2	upstream_gene_variant	6110	689663	c.-1945_-1943delAAT	0	0	1	0	0	0	0	0	0	0	0	0	0	0	0	0	0	0	0	0	0	0	0	0	0	0	0	0	0	0	0	0	0	0	0	0	0	0	0	0	0	0	0
LIP2_8	CPAR2_703200	LIP2	missense_variant	6110	687489	p.Pro80Ser/c.238C>T	0	0	0	0	0	0	0	0	0	0	0	0	0	0	0	0	0	0	0	0	0	0	0	0	0	0	0	0	0	0	0	0	0	0	0	0	0	0	1	0	0	1	0
LIP2_9	CPAR2_703200	LIP2	downstream_gene_variant	6110	684928	c.*1401C>A	0	0	0	0	0	0	0	0	0	0	0	0	1	0	0	0	0	0	0	0	0	0	0	0	0	0	0	0	0	0	0	0	0	0	0	0	0	0	0	0	0	0	0
LIP2_10	CPAR2_703200	LIP2	synonymous_variant	6110	687484	p.82/c.240_243delAAACinsCAAT	0	0	0	0	0	0	0	0	0	0	0	0	0	0	1	0	0	0	0	0	0	0	0	0	0	0	0	0	0	0	0	0	0	0	0	0	0	0	0	0	0	0	0
LIP2_11	CPAR2_703200	LIP2	downstream_gene_variant	6110	686166	c.*163C>T	0	0	1	0	0	0	0	0	0	0	0	0	0	0	0	0	0	0	0	0	0	0	0	0	0	0	0	0	0	0	0	0	0	0	0	0	0	0	0	0	0	0	0
LIP2_12	CPAR2_703200	LIP2	upstream_gene_variant	6110	689270	c.-1544C>G	0	0	1	1	0	1	0	0	1	1	1	0	1	1	0	1	0	1	1	0	1	0	1	0	0	0	0	0	0	0	0	1	0	0	0	0	0	0	1	0	0	1	0
LIP2_13	CPAR2_703200	LIP2	downstream_gene_variant	6110	681993	c.*4336A>G	0	0	0	0	0	0	0	0	0	0	0	0	1	1	0	0	0	0	0	0	0	0	0	0	0	0	0	0	0	0	0	0	0	0	0	0	0	0	0	0	0	0	0
LIP2_14	CPAR2_703200	LIP2	missense_variant	6110	686758	p.Gln323His/c.969A>T	0	0	0	0	0	0	0	0	0	0	0	0	0	0	0	0	0	0	0	0	0	0	0	0	0	0	0	0	0	0	0	0	0	1	0	0	0	0	0	0	0	0	0
LIP2_15	CPAR2_703200	LIP2	downstream_gene_variant	6110	685163	c.*1166A>G	0	0	0	0	0	0	0	0	1	0	0	0	0	0	0	0	0	0	0	0	1	0	0	0	0	0	0	0	0	0	0	0	0	0	0	0	0	0	0	0	0	0	0
LIP2_16	CPAR2_703200	LIP2	downstream_gene_variant	6110	681871	c.*4458G>A	0	0	1	0	0	0	0	0	0	0	0	0	0	0	0	0	0	0	0	0	0	0	0	0	0	0	0	0	0	0	0	1	0	0	0	0	0	0	0	0	0	0	0
LIP2_17	CPAR2_703200	LIP2	missense_variant	6110	686625	p.Leu368Ile/c.1102C>A	0	0	0	0	0	0	0	0	0	0	0	0	0	0	0	0	0	0	0	0	0	0	0	0	0	0	0	0	0	0	0	0	0	0	0	0	0	0	0	0	0	0	0
NDT80_1	CPAR2_213640	NDT80	downstream_gene_variant	5809	2901116	c.*1292delC	0	0	0	0	0	0	0	0	0	0	0	0	0	0	0	0	0	0	0	0	0	0	0	0	0	0	0	0	0	0	0	0	0	0	0	0	0	0	0	0	0	0	0
NDT80_2	CPAR2_213640	NDT80	downstream_gene_variant	5809	2901247	c.*1155delA	0	0	0	0	0	0	0	0	0	0	0	0	1	0	0	0	0	0	0	0	0	0	0	0	0	0	0	0	0	0	0	0	0	0	0	0	0	0	0	0	0	0	0
NDT80_3	CPAR2_213640	NDT80	downstream_gene_variant	5809	2901518	c.*898C>T	0	0	0	0	0	1	0	0	0	0	1	0	0	0	0	0	0	0	0	0	0	0	0	0	0	0	0	0	0	0	0	0	0	0	0	0	0	0	0	0	0	0	0
NDT80_4	CPAR2_213640	NDT80	upstream_gene_variant	5809	2905086	c.-693_-692insTCT	0	0	0	0	0	0	0	0	0	0	1	0	0	0	0	0	0	0	0	0	0	0	0	0	0	0	0	0	0	0	0	0	0	0	0	0	0	0	0	0	0	0	0
NDT80_5	CPAR2_213640	NDT80	missense_variant	5809	2904186	p.Ser78Phe/c.233_234delCCinsTT	0	0	0	0	0	0	0	0	0	0	0	0	1	1	0	0	0	0	0	0	0	0	0	0	0	0	0	0	0	0	0	0	0	0	0	0	0	0	0	0	0	0	0
NDT80_6	CPAR2_213640	NDT80	upstream_gene_variant	5809	2905086	c.-692_-690delTCT	0	0	0	0	0	0	0	0	0	0	0	0	0	0	0	0	0	0	0	0	0	1	0	0	0	0	0	0	0	0	0	0	1	0	0	0	0	1	0	0	1	0	0
NDT80_7	CPAR2_213640	NDT80	upstream_gene_variant	5809	2905853	c.-1434T>C	0	0	0	0	0	0	0	0	0	0	0	0	0	1	0	0	0	0	0	0	0	0	0	0	0	0	0	0	0	0	0	0	0	0	0	0	0	0	0	0	0	0	0
NDT80_8	CPAR2_213640	NDT80	downstream_gene_variant	5809	2902300	c.*116C>T	0	0	0	0	0	1	0	0	0	0	1	0	0	0	0	0	0	0	0	0	0	0	0	0	0	0	0	0	0	0	0	0	0	0	0	0	0	0	0	0	0	0	0
NDT80_9	CPAR2_213640	NDT80	upstream_gene_variant	5809	2907719	c.-3300C>G	0	0	0	1	0	0	0	0	0	0	0	0	0	0	0	1	0	1	1	0	0	0	1	0	0	0	0	0	0	0	0	0	0	0	0	0	0	0	0	0	0	0	0
NDT80_10	CPAR2_213640	NDT80	downstream_gene_variant	5809	2898169	c.*4247C>T	0	0	0	0	0	0	1	0	0	0	0	0	0	0	0	0	0	0	0	0	0	0	0	0	0	0	0	0	0	0	0	0	0	0	0	0	0	0	0	0	0	0	0
NDT80_11	CPAR2_213640	NDT80	upstream_gene_variant	5809	2905011	c.-592C>T	0	0	0	1	0	0	0	0	0	0	0	0	0	0	0	1	0	1	1	0	0	0	1	0	0	0	0	0	0	0	0	0	0	0	0	0	0	0	0	0	0	0	0
NDT80_12	CPAR2_213640	NDT80	upstream_gene_variant	5809	2904788	c.-384_-380delTTTTC	0	0	0	0	0	0	0	0	0	0	0	0	0	0	0	0	0	0	1	0	0	0	0	0	0	0	0	0	0	0	0	0	0	0	0	0	0	0	0	0	0	0	0
NDT80_13	CPAR2_213640	NDT80	upstream_gene_variant	5809	2906775	c.-2356T>G	0	0	0	0	0	0	0	0	0	0	0	0	0	0	0	0	0	0	0	0	0	0	0	0	0	0	0	0	0	0	0	0	0	0	0	0	0	0	0	0	0	0	0
NDT80_14	CPAR2_213640	NDT80	downstream_gene_variant	5809	2897799	c.*4617G>C	0	0	0	0	0	0	0	0	0	0	0	0	0	1	0	0	0	0	0	0	0	0	0	0	0	0	0	0	0	0	0	0	0	0	0	0	0	0	0	0	0	0	0
PDR1b_1	CPAR2_102000	PDR1b	upstream_gene_variant	5569	459564	c.-2832delA	0	0	0	0	0	0	0	0	0	0	0	0	0	0	0	0	0	0	0	0	0	0	0	0	0	0	0	0	0	0	0	0	0	0	0	0	0	0	0	0	0	0	0
PDR1b_2	CPAR2_102000	PDR1b	missense_variant	5569	455118	p.Asp543Asn/c.1627G>A	0	0	0	0	0	0	0	0	0	0	0	0	1	0	0	0	0	0	0	0	0	0	0	0	0	0	0	0	0	0	0	0	0	0	0	0	0	0	0	0	0	0	0
PDR1b_3	CPAR2_102000	PDR1b	missense_variant	5569	453698	p.Pro1016Leu/c.3047C>T	0	0	0	0	0	0	0	0	0	0	0	0	0	0	0	0	0	0	0	0	0	0	0	0	0	0	0	0	0	0	0	0	0	0	0	0	0	0	0	0	0	0	0
PDR1b_4	CPAR2_102000	PDR1b	upstream_gene_variant	5569	457203	c.-464delA	0	0	0	0	0	0	0	0	0	0	0	0	0	0	0	0	0	0	0	0	0	0	0	0	0	0	0	0	0	0	0	0	0	0	0	0	0	0	0	0	0	0	0
PDR1b_5	CPAR2_102000	PDR1b	upstream_gene_variant	5569	457679	c.-935C>T	0	0	0	0	0	0	0	0	0	0	0	0	0	0	0	0	0	0	0	0	0	0	0	0	0	0	0	0	0	0	0	0	0	0	0	0	0	0	0	0	0	0	0
PDR1b_6	CPAR2_102000	PDR1b	missense_variant	5569	456330	p.Gly139Arg/c.415G>A	0	0	0	0	0	0	0	0	0	0	0	0	1	0	0	0	0	0	0	0	0	0	0	0	0	0	0	0	0	0	0	0	0	0	0	0	0	0	0	0	0	0	0
PDR1b_7	CPAR2_102000	PDR1b	upstream_gene_variant	5569	458505	c.-1778_-1777insTA	0	0	0	0	0	0	0	0	0	0	0	0	0	0	0	0	0	0	0	0	0	0	0	0	0	0	0	0	0	0	0	0	0	0	0	0	0	0	1	0	0	0	0
PDR1b_8	CPAR2_102000	PDR1b	missense_variant	5569	456044	p.Met234Lys/c.701T>A	0	0	0	0	0	0	1	0	0	0	0	0	0	0	0	0	0	0	0	0	0	0	0	0	0	0	0	0	0	0	0	0	0	0	0	0	0	0	0	0	0	0	0
PDR1b_9	CPAR2_102000	PDR1b	missense_variant	5569	453468	p.Lys1093Gln/c.3277A>C	0	0	1	0	0	0	0	0	0	0	0	0	0	0	0	0	0	0	0	0	0	0	0	0	0	0	0	0	0	0	0	1	0	0	0	0	0	0	0	0	0	0	0
PDR1b_10	CPAR2_102000	PDR1b	downstream_gene_variant	5569	448480	c.*4296A>G	0	0	0	0	0	0	0	0	0	1	0	0	0	0	0	0	0	0	0	0	0	0	0	0	0	0	0	0	0	0	0	0	0	0	0	0	0	0	0	0	0	0	0
PDR1b_11	CPAR2_102000	PDR1b	upstream_gene_variant	5569	457339	c.-605_-604insAC	1	1	0	1	0	1	0	1	1	1	0	1	1	0	1	1	1	1	1	1	1	1	1	1	1	0	1	0	0	1	0	0	1	1	1	1	1	1	1	1	1	0	1
RTA3_1	CPAR2_104610	RTA3	upstream_gene_variant	5569	1015033	c.-379delA	0	0	0	0	0	0	0	0	1	1	0	0	0	0	0	0	0	0	0	0	1	0	0	0	0	0	0	0	0	0	0	0	0	0	0	0	0	0	1	0	0	1	0
RTA3_2	CPAR2_104610	RTA3	upstream_gene_variant	5569	1010561	c.-4860C>T	0	0	0	0	0	0	0	0	1	0	0	0	0	0	0	0	0	0	0	0	0	0	0	0	0	0	0	0	0	0	0	0	0	0	0	0	0	0	0	0	0	0	0
RTA3_3	CPAR2_104610	RTA3	downstream_gene_variant	5569	1017648	c.*629T>C	0	0	0	1	0	1	0	0	1	1	1	0	1	0	0	1	0	1	1	0	1	0	1	0	0	0	0	0	0	0	0	1	0	0	0	0	0	0	1	0	0	1	0
RTA3_4	CPAR2_104610	RTA3	upstream_gene_variant	5569	1014993	c.-428C>T	0	0	0	0	0	0	0	0	0	0	0	0	0	0	0	0	0	0	0	0	0	0	0	0	0	0	0	0	0	0	0	0	0	0	0	0	0	0	0	0	0	0	0
RTA3_5	CPAR2_104610	RTA3	upstream_gene_variant	5569	1011731	c.-3690G>A	0	0	0	0	0	0	0	0	0	0	0	0	1	0	0	0	0	0	0	0	0	0	0	0	0	0	0	0	0	0	0	0	0	0	0	0	0	0	0	0	0	0	0
RTA3_6	CPAR2_104610	RTA3	downstream_gene_variant	5569	1018023	c.*1004C>G	0	0	0	0	0	0	0	0	0	1	0	0	0	0	0	0	0	0	0	0	1	0	0	0	0	0	0	0	0	0	0	0	0	0	0	0	0	0	1	0	0	1	0
RTA3_7	CPAR2_104610	RTA3	upstream_gene_variant	5569	1010772	c.-4649A>G	0	0	1	0	0	0	0	0	0	0	0	0	0	0	0	0	0	0	0	0	0	0	0	0	0	0	0	0	0	0	0	0	0	0	0	0	0	0	0	0	0	0	0
RTA3_8	CPAR2_104610	RTA3	downstream_gene_variant	5569	1021026	c.*4007C>T	0	0	1	0	0	1	0	0	0	0	1	0	1	1	0	0	0	0	0	0	0	0	0	0	0	0	0	0	0	0	0	1	0	0	0	0	0	0	0	0	0	0	0
RTA3_9	CPAR2_104610	RTA3	upstream_gene_variant	5569	1014913	c.-508G>A	0	0	0	0	0	1	0	0	0	0	1	0	0	0	0	0	0	0	0	0	0	0	0	0	0	0	0	0	0	0	0	0	0	0	0	0	0	0	0	0	0	0	0
RTA3_10	CPAR2_104610	RTA3	upstream_gene_variant	5569	1015159	c.-262T>C	0	0	0	0	0	0	0	0	0	0	0	0	0	0	0	0	0	0	0	0	0	0	0	0	0	0	0	0	0	0	0	0	0	0	0	0	0	0	0	0	0	1	0
RTA3_11	CPAR2_104610	RTA3	downstream_gene_variant	5569	1018410	c.*1391_*1392delATinsTA	0	0	0	0	0	0	0	0	0	0	0	0	1	0	0	0	0	0	0	0	0	0	0	0	0	0	0	0	0	0	0	0	0	0	0	0	0	0	0	0	0	0	0
RTA3_12	CPAR2_104610	RTA3	downstream_gene_variant	5569	1017566	c.*547A>G	0	0	1	0	0	1	0	0	0	0	1	0	1	1	0	0	0	0	0	0	0	0	0	0	0	0	0	0	0	0	0	1	0	0	0	0	0	0	0	0	0	0	0
RTA3_13	CPAR2_104610	RTA3	missense_variant	5569	1016381	p.Leu321Met/c.961T>A	0	0	0	0	0	0	0	0	0	0	0	0	0	0	0	0	0	0	0	0	0	0	0	0	0	0	0	0	0	0	0	0	0	0	0	0	0	0	0	0	0	0	0
RTA3_14	CPAR2_104610	RTA3	synonymous_variant	5569	1015618	p.Gly66Gly/c.198A>G	0	0	0	0	0	0	0	0	0	0	0	0	1	0	0	0	0	0	0	0	0	0	0	0	0	0	0	0	0	0	0	0	0	0	0	0	0	0	0	0	0	0	0
SPT3_1	CPAR2_200390	SPT3	downstream_gene_variant	5809	64556	c.*1291C>T	0	0	0	0	0	0	0	0	0	0	0	0	0	0	0	0	0	0	0	0	0	0	0	0	0	0	0	0	0	0	0	0	0	0	0	0	0	0	0	0	0	0	0
SPT3_2	CPAR2_200390	SPT3	upstream_gene_variant	5809	60703	c.-1576T>A	0	0	0	0	0	0	0	0	0	0	0	0	0	0	0	0	0	0	0	0	0	0	0	0	0	0	0	0	0	0	0	0	0	0	0	0	0	0	0	0	0	0	0
SPT3_3	CPAR2_200390	SPT3	downstream_gene_variant	5809	64060	c.*795C>T	0	0	1	0	0	0	0	0	0	0	0	0	0	0	0	0	0	0	0	0	0	0	0	0	0	0	0	0	0	0	0	1	0	0	0	0	0	0	0	0	0	0	0
SPT3_4	CPAR2_200390	SPT3	downstream_gene_variant	5809	65015	c.*1750T>C	0	0	0	0	0	0	0	0	0	0	0	0	0	0	0	0	0	0	0	0	0	0	0	0	0	0	0	0	0	0	0	0	0	0	0	0	0	0	0	0	0	0	0
SPT3_5	CPAR2_200390	SPT3	upstream_gene_variant	5809	60497	c.-1782A>G	0	0	0	0	0	1	0	0	0	0	1	0	0	0	0	0	0	0	0	0	0	0	0	0	0	0	0	0	0	0	0	0	0	0	0	0	0	0	0	0	0	0	0
SPT3_6	CPAR2_200390	SPT3	downstream_gene_variant	5809	67131	c.*3866C>T	0	0	0	0	0	0	0	0	0	1	0	0	0	0	0	0	0	0	0	0	0	0	0	0	0	0	0	0	0	0	0	0	0	0	0	0	0	0	0	0	0	0	0
SPT3_7	CPAR2_200390	SPT3	upstream_gene_variant	5809	59726	c.-2553A>T	0	0	0	0	0	0	0	0	0	0	0	0	1	0	0	0	0	0	0	0	0	0	0	0	0	0	0	0	0	0	0	0	0	0	0	0	0	0	0	0	0	0	0
SPT3_8	CPAR2_200390	SPT3	downstream_gene_variant	5809	66679	c.*3414T>C	0	0	0	0	0	0	0	0	0	0	0	0	0	1	0	0	0	0	0	0	0	0	0	0	0	0	0	0	0	0	0	0	0	0	0	0	0	0	0	0	0	0	0
SPT3_9	CPAR2_200390	SPT3	upstream_gene_variant	5809	61783	c.-496G>A	0	0	0	0	0	0	0	0	1	1	0	0	0	0	0	0	0	0	0	0	1	0	0	0	0	0	0	0	0	0	0	0	0	0	0	0	0	0	1	0	0	1	0
TEC1_1	CPAR2_805930	TEC1	upstream_gene_variant	5807	1348622	c.-4304A>C	0	0	1	0	0	0	0	0	1	1	1	0	1	0	1	1	0	1	1	0	1	1	1	0	0	0	0	0	1	0	0	0	1	0	0	0	0	1	1	0	1	1	0
TEC1_2	CPAR2_805930	TEC1	upstream_gene_variant	5807	1348705	c.-4221G>A	0	0	1	0	0	0	0	0	1	1	1	0	1	1	1	1	0	1	1	0	1	1	1	0	0	0	0	0	0	0	0	0	1	0	0	0	0	1	1	0	1	1	0
TEC1_3	CPAR2_805930	TEC1	downstream_gene_variant	5807	1355627	c.*253delA	0	0	0	1	0	0	0	0	0	0	0	0	0	0	0	1	0	1	1	0	0	0	1	0	0	0	0	0	0	0	0	0	0	0	0	0	0	0	0	0	0	0	0
TEC1_4	CPAR2_805930	TEC1	synonymous_variant	5807	1354119	p.Asn398Asn/c.1194C>T	0	0	1	0	0	0	0	0	0	0	0	0	0	0	0	0	0	0	0	0	0	0	0	0	0	0	0	0	0	0	0	0	0	0	0	0	0	0	0	0	0	0	0
TEC1_5	CPAR2_805930	TEC1	downstream_gene_variant	5807	1356281	c.*896C>T	0	0	0	1	0	0	0	0	0	0	0	0	0	0	0	1	0	1	1	0	0	0	1	0	0	0	0	0	0	0	0	0	0	0	0	0	0	0	0	0	0	0	0
TEC1_6	CPAR2_805930	TEC1	upstream_gene_variant	5807	1349451	c.-3475C>T	0	0	0	0	0	0	0	0	0	0	0	0	0	0	0	0	0	0	0	0	0	0	0	0	0	0	1	0	0	0	0	0	0	0	0	0	0	0	0	0	0	0	0
TEC1_7	CPAR2_805930	TEC1	downstream_gene_variant	5807	1358491	c.*3106C>T	0	0	1	0	0	0	0	0	0	0	0	0	0	0	0	0	0	0	0	0	0	0	0	0	0	0	0	0	0	0	0	1	0	0	0	0	0	0	0	0	0	0	0
TEC1_8	CPAR2_805930	TEC1	upstream_gene_variant	5807	1352729	c.-197A>T	0	0	0	0	0	0	0	0	1	1	0	0	0	0	0	0	0	0	0	0	1	0	0	0	0	0	0	0	0	0	0	0	0	0	0	0	0	0	1	0	0	1	0
TEC1_9	CPAR2_805930	TEC1	missense_variant	5807	1355006	p.Val694Ala/c.2081T>C	0	0	0	0	0	0	0	0	0	0	0	0	0	0	0	0	0	0	0	0	0	1	0	0	0	0	0	0	0	0	0	0	1	0	0	0	0	1	0	0	0	0	0
TEC1_10	CPAR2_805930	TEC1	downstream_gene_variant	5807	1359207	c.*3822C>T	0	0	0	0	0	0	0	0	0	1	0	0	0	0	0	0	0	0	0	0	0	0	0	0	0	0	0	0	0	0	0	0	0	0	0	0	0	0	0	0	0	0	0
UME6_1	CPAR2_803820	UME6	downstream_gene_variant	5807	848146	c.*412T>G	0	0	0	0	0	0	0	0	1	1	0	0	0	0	0	0	0	0	0	0	1	0	0	0	0	0	0	0	0	0	0	0	0	0	0	0	0	0	1	0	0	1	0
UME6_2	CPAR2_803820	UME6	upstream_gene_variant	5807	851009	c.-16T>C	0	0	0	0	0	0	0	0	0	0	0	0	0	0	0	0	0	0	0	0	0	0	0	0	0	0	0	0	0	0	0	0	0	0	0	0	0	0	0	0	0	0	0
UME6_3	CPAR2_803820	UME6	missense_variant	5807	850237	p.Ser253Cys/c.757A>T	0	0	0	0	0	0	0	0	0	0	0	0	0	1	0	0	0	0	0	0	0	0	0	0	0	0	0	0	0	0	0	0	0	0	0	0	0	0	0	0	0	0	0
UME6_4	CPAR2_803820	UME6	missense_variant	5807	850858	p.Thr46Ala/c.136A>G	0	0	0	0	0	0	0	0	1	1	0	0	0	0	0	0	0	0	0	0	1	0	0	0	0	0	0	0	0	0	0	0	0	0	0	0	0	0	1	0	0	1	0
UME6_5	CPAR2_803820	UME6	downstream_gene_variant	5807	847781	c.*777T>C	0	0	0	0	0	0	0	0	0	0	0	0	0	0	0	0	0	0	0	0	1	0	0	0	0	0	0	0	0	0	0	0	0	0	0	0	0	0	0	0	0	0	0
UME6_6	CPAR2_803820	UME6	downstream_gene_variant	5807	844255	c.*4303C>T	0	0	0	0	0	0	0	0	1	1	0	0	0	0	0	0	0	0	0	0	1	0	0	0	0	0	0	0	0	0	0	0	0	0	0	0	0	0	1	0	0	1	0
UME6_7	CPAR2_803820	UME6	upstream_gene_variant	5807	851526	c.-533T>C	0	0	0	0	0	0	0	0	0	0	0	0	0	0	0	0	0	0	0	0	0	0	1	0	0	0	0	0	0	0	0	0	0	0	0	0	0	0	0	0	0	0	0
UME6_8	CPAR2_803820	UME6	downstream_gene_variant	5807	848239	c.*319C>T	0	0	0	1	0	0	0	0	0	0	0	0	0	0	0	1	0	0	1	0	0	0	1	0	0	0	0	0	0	0	0	0	0	0	0	0	0	0	0	0	0	0	0
UME6_9	CPAR2_803820	UME6	downstream_gene_variant	5807	848170	c.*388A>G	1	1	0	1	0	0	0	0	1	0	0	0	0	0	0	1	0	1	1	0	1	1	1	1	1	0	0	0	0	0	0	0	1	0	0	1	1	1	1	1	1	1	0
UME6_10	CPAR2_803820	UME6	missense_variant	5807	849355	p.Cys547Gly/c.1639T>G	0	0	1	1	0	1	0	0	1	1	1	0	1	1	0	1	0	1	1	0	1	0	1	0	0	0	0	0	0	0	0	0	0	0	0	0	0	0	1	0	0	1	0
UME6_11	CPAR2_803820	UME6	upstream_gene_variant	5807	855475	c.-4482A>G	0	0	1	1	0	1	0	0	1	1	1	0	1	1	1	1	0	1	1	0	1	1	1	0	0	0	0	0	0	0	0	0	1	0	0	0	0	1	1	0	1	1	0
UME6_12	CPAR2_803820	UME6	missense_variant	5807	850857	p.Thr46Lys/c.137C>A	1	1	0	0	1	0	0	1	0	0	0	1	0	0	0	0	1	0	0	1	0	0	0	1	1	1	0	1	0	1	1	0	0	1	1	1	1	0	0	1	0	0	1
UME6_13	CPAR2_803820	UME6	upstream_gene_variant	5807	851714	c.-733delT	0	0	0	0	0	0	0	0	0	0	0	0	1	0	0	0	0	0	0	0	0	0	0	0	0	0	0	0	0	0	0	0	0	0	0	0	0	0	0	0	0	0	0
UME6_14	CPAR2_803820	UME6	downstream_gene_variant	5807	848525	c.*33A>T	0	0	0	0	0	0	0	0	0	0	0	0	1	1	0	0	0	0	0	0	0	0	0	0	0	0	0	0	0	0	0	0	0	0	0	0	0	0	0	0	0	0	0
UME6_15	CPAR2_803820	UME6	downstream_gene_variant	5807	843865	c.*4693A>G	0	0	1	0	0	0	0	0	0	0	1	0	1	1	0	0	0	0	0	0	0	0	0	0	0	0	0	0	0	0	0	1	0	0	0	0	0	0	0	0	0	0	0
UME6_16	CPAR2_803820	UME6	downstream_gene_variant	5807	846371	c.*2187G>T	0	0	0	0	0	0	0	0	0	0	0	0	1	0	0	0	0	0	0	0	0	0	0	0	0	0	0	0	0	0	0	0	0	0	0	0	0	0	0	0	0	0	0
ace2_1	CPAR2_204370	ace2	upstream_gene_variant	5809	886476	c.-4667_-4658delTTTGATTTGA	0	0	0	0	0	0	0	0	1	0	0	0	0	0	0	0	0	0	0	0	0	0	0	0	0	0	0	0	0	0	0	0	0	0	0	0	0	1	0	0	0	0	0
ace2_2	CPAR2_204370	ace2	upstream_gene_variant	5809	887983	c.-3192C>T	0	0	0	0	0	0	0	0	0	0	0	0	1	1	0	0	0	0	0	0	0	0	0	0	0	0	0	0	0	0	0	0	0	0	0	0	0	0	0	0	0	0	0
ace2_3	CPAR2_204370	ace2	upstream_gene_variant	5809	888167	c.-3008G>A	0	0	0	0	0	0	0	0	0	0	0	0	1	0	0	0	0	0	0	0	0	0	0	0	0	0	0	0	0	0	0	0	0	0	0	0	0	0	0	0	0	0	0
ace2_4	CPAR2_204370	ace2	downstream_gene_variant	5809	897932	c.*3974A>T	0	0	0	0	0	0	0	0	0	0	0	0	1	0	0	0	0	0	0	0	0	0	0	0	0	0	0	0	0	0	0	0	0	0	0	0	0	0	0	0	0	0	0
ace2_5	CPAR2_204370	ace2	missense_variant	5809	893233	p.Ser687Ala/c.2059T>G	0	0	0	0	0	0	0	0	0	0	0	0	1	0	0	0	0	0	0	0	0	0	0	0	0	0	0	0	0	0	0	0	0	0	0	0	0	0	0	0	0	0	0
ace2_6	CPAR2_204370	ace2	upstream_gene_variant	5809	890403	c.-772G>A	0	0	0	0	0	0	0	0	0	0	0	0	0	0	0	0	0	0	0	0	0	0	0	0	0	0	0	0	0	0	0	0	0	0	0	0	0	0	0	0	0	0	0
ace2_7	CPAR2_204370	ace2	upstream_gene_variant	5809	890041	c.-1134C>T	0	0	0	0	0	0	0	0	0	0	0	0	1	1	0	0	0	0	0	0	0	0	0	0	0	0	0	0	0	0	0	0	0	0	0	0	0	0	0	0	0	0	0
ace2_8	CPAR2_204370	ace2	downstream_gene_variant	5809	894087	c.*129G>A	0	0	0	0	0	0	0	0	1	1	0	0	0	0	0	0	0	0	0	0	1	0	0	0	0	0	0	0	0	0	0	0	0	0	0	0	0	0	1	0	0	1	0
ace2_9	CPAR2_204370	ace2	upstream_gene_variant	5809	888197	c.-2978T>C	0	0	0	0	0	0	0	0	0	0	0	0	1	1	0	0	0	0	0	0	0	0	0	0	0	0	0	0	0	0	0	0	0	0	0	0	0	0	0	0	0	0	0
ace2_10	CPAR2_204370	ace2	upstream_gene_variant	5809	888263	c.-2906_-2905insAAGTA	0	0	0	0	0	0	0	0	0	0	0	0	0	0	0	0	0	0	0	0	0	0	0	0	0	0	0	0	0	0	0	0	0	0	0	0	0	0	0	0	0	0	0
ace2_11	CPAR2_204370	ace2	upstream_gene_variant	5809	888457	c.-2718_-2717delGAinsAT	0	0	0	0	0	0	0	0	0	0	0	0	1	0	0	0	0	0	0	0	0	0	0	0	0	0	0	0	0	0	0	0	0	0	0	0	0	0	0	0	0	0	0
ace2_12	CPAR2_204370	ace2	upstream_gene_variant	5809	888832	c.-2343A>C	0	0	0	0	0	0	0	0	0	0	0	0	1	1	0	0	0	0	0	0	0	0	0	0	0	0	0	0	0	0	0	0	0	0	0	0	0	0	0	0	0	0	0
ace2_13	CPAR2_204370	ace2	upstream_gene_variant	5809	889738	c.-1437C>T	0	0	0	0	0	0	0	0	0	0	0	0	1	1	0	0	0	0	0	0	0	0	0	0	0	0	0	0	0	0	0	0	0	0	0	0	0	0	0	0	0	0	0
ace2_14	CPAR2_204370	ace2	upstream_gene_variant	5809	889102	c.-2073T>C	0	0	0	0	0	0	0	0	0	0	0	0	1	1	0	0	0	0	0	0	0	0	0	0	0	0	0	0	0	0	0	0	0	0	0	0	0	0	0	0	0	0	0
ace2_15	CPAR2_204370	ace2	upstream_gene_variant	5809	887868	c.-3307T>C	0	0	0	0	0	0	0	0	0	0	0	0	1	1	0	0	0	0	0	0	0	0	0	0	0	0	0	0	0	0	0	0	0	0	0	0	0	0	0	0	0	0	0
ace2_16	CPAR2_204370	ace2	upstream_gene_variant	5809	887817	c.-3358A>T	0	0	0	0	0	0	0	0	0	0	0	0	1	1	0	0	0	0	0	0	0	0	0	0	0	0	0	0	0	0	0	0	0	0	0	0	0	0	0	0	0	0	0
ace2_17	CPAR2_204370	ace2	upstream_gene_variant	5809	887420	c.-3744delT	0	0	0	0	0	0	0	0	0	0	0	0	0	0	0	0	0	0	0	0	0	0	0	0	0	0	0	0	0	0	0	0	0	0	0	0	0	0	0	0	0	0	0
ace2_18	CPAR2_204370	ace2	upstream_gene_variant	5809	887440	c.-3735G>T	0	0	0	0	0	0	0	0	0	0	0	0	1	0	0	0	0	0	0	0	0	0	0	0	0	0	0	0	0	0	0	0	0	0	0	0	0	0	0	0	0	0	0
ace2_19	CPAR2_204370	ace2	upstream_gene_variant	5809	886698	c.-4471delA	0	0	0	0	0	0	0	0	1	0	0	0	0	0	0	0	0	0	0	0	0	0	0	0	0	0	0	0	0	0	0	0	0	0	0	0	0	0	0	0	0	0	0
ace2_20	CPAR2_204370	ace2	upstream_gene_variant	5809	889363	c.-1812C>A	0	0	1	1	0	1	1	0	1	1	1	0	1	1	1	1	0	1	1	0	1	1	1	0	0	0	1	0	0	0	0	1	1	0	0	0	0	1	1	0	1	1	0
ace2_21	CPAR2_204370	ace2	upstream_gene_variant	5809	889081	c.-2094T>C	0	0	0	0	0	0	0	0	0	0	0	0	1	0	0	0	0	0	0	0	0	0	0	0	0	0	0	0	0	0	0	0	0	0	0	0	0	0	0	0	0	0	0
ace2_22	CPAR2_204370	ace2	upstream_gene_variant	5809	887232	c.-3943C>T	0	0	0	0	0	0	0	0	0	0	0	0	1	1	0	0	0	0	0	0	0	0	0	0	0	0	0	0	0	0	0	0	0	0	0	0	0	0	0	0	0	0	0
ace2_23	CPAR2_204370	ace2	upstream_gene_variant	5809	887135	c.-4040T>C	0	0	0	0	0	0	0	0	0	0	0	0	1	1	0	0	0	0	0	0	0	0	0	0	0	0	0	0	0	0	0	0	0	0	0	0	0	0	0	0	0	0	0
ace2_24	CPAR2_204370	ace2	downstream_gene_variant	5809	898501	c.*4543T>C	1	1	0	0	1	0	0	1	0	0	0	1	0	0	0	0	1	0	0	1	0	0	0	1	1	1	0	1	0	1	1	0	0	1	1	1	1	0	0	1	0	0	1
ace2_25	CPAR2_204370	ace2	downstream_gene_variant	5809	897255	c.*3297T>A	0	0	0	0	0	0	0	0	0	0	0	0	0	1	0	0	0	0	0	0	0	0	0	0	0	0	0	0	0	0	0	0	0	0	0	0	0	0	0	0	0	0	0
ace2_26	CPAR2_204370	ace2	upstream_gene_variant	5809	887720	c.-3455G>T	0	0	0	0	0	0	0	0	0	0	0	0	1	1	0	0	0	0	0	0	0	0	0	0	0	0	0	0	0	0	0	0	0	0	0	0	0	0	0	0	0	0	0
ace2_27	CPAR2_204370	ace2	downstream_gene_variant	5809	896014	c.*2056C>T	0	0	1	0	0	0	0	0	0	0	0	0	0	0	0	0	0	0	0	0	0	0	0	0	0	0	0	0	0	0	0	0	0	0	0	0	0	0	0	0	0	0	0
ace2_28	CPAR2_204370	ace2	downstream_gene_variant	5809	896994	c.*3036A>G	0	0	0	0	0	0	0	0	0	0	0	0	0	0	0	0	0	0	0	0	0	0	0	0	0	0	1	0	0	0	0	0	0	0	0	0	0	0	0	0	0	0	0
ace2_29	CPAR2_204370	ace2	synonymous_variant	5809	892515	p.Gln447Gln/c.1341G>A	0	0	0	1	0	0	0	0	1	1	0	0	0	0	0	1	0	1	1	0	1	0	1	0	0	0	0	0	0	0	0	0	0	0	0	0	0	0	1	0	0	1	0
bcr1_1	CPAR2_205990	bcr1	downstream_gene_variant	5809	1245006	c.*4488G>A	0	0	0	0	0	0	0	0	0	0	0	0	0	0	0	0	0	0	0	0	1	0	0	0	0	0	0	0	0	0	0	0	0	0	0	0	0	0	0	0	0	0	0
bcr1_2	CPAR2_205990	bcr1	upstream_gene_variant	5809	1254337	c.-2680delT	0	0	0	1	0	1	0	0	1	1	1	0	0	0	0	0	0	0	1	0	1	1	0	0	0	0	0	0	0	0	0	0	1	0	0	0	0	1	1	0	1	1	0
bcr1_3	CPAR2_205990	bcr1	upstream_gene_variant	5809	1255909	c.-4241G>A	0	0	0	0	0	0	0	0	0	0	0	0	0	0	0	0	0	0	0	0	0	0	0	0	0	0	0	0	0	0	0	0	0	0	0	0	0	0	0	0	0	0	0
bcr1_4	CPAR2_205990	bcr1	downstream_gene_variant	5809	1248797	c.*697T>C	0	0	0	0	0	0	0	0	1	0	1	0	0	0	1	1	0	1	1	0	1	1	0	0	0	0	0	0	0	0	0	0	1	0	0	0	0	1	0	0	1	0	0
bcr1_5	CPAR2_205990	bcr1	downstream_gene_variant	5809	1245158	c.*4336C>T	0	0	0	0	0	1	0	0	0	0	0	0	0	0	0	0	0	0	0	0	0	0	0	0	0	0	0	0	0	0	0	0	0	0	0	0	0	0	0	0	0	0	0
bcr1_6	CPAR2_205990	bcr1	downstream_gene_variant	5809	1248667	c.*827T>C	0	0	0	0	0	0	0	0	0	0	1	0	0	0	0	0	0	0	0	0	0	0	0	0	0	0	0	0	0	0	0	0	0	0	0	0	0	0	0	0	0	0	0
bcr1_7	CPAR2_205990	bcr1	downstream_gene_variant	5809	1244818	c.*4676G>A	0	0	0	0	0	0	0	0	1	0	0	0	0	0	0	0	0	0	0	0	0	0	0	0	0	0	0	0	0	0	0	0	0	0	0	0	0	0	0	0	0	0	0
bcr1_8	CPAR2_205990	bcr1	upstream_gene_variant	5809	1253854	c.-2186A>G	0	0	0	0	0	0	0	0	0	1	0	0	0	0	0	0	0	0	0	0	1	0	0	0	0	0	0	0	0	0	0	0	0	0	0	0	0	0	1	0	0	1	0
bcr1_9	CPAR2_205990	bcr1	upstream_gene_variant	5809	1252347	c.-679C>A	0	0	0	0	0	0	0	0	1	1	0	0	0	0	0	0	0	0	0	0	1	0	0	0	0	0	0	0	0	0	0	0	0	0	0	0	0	0	1	0	0	1	0
cph2_1	CPAR2_603440	cph2	upstream_gene_variant	5504	803508	c.-3968_-3967insT	0	0	0	0	0	0	0	0	0	0	0	0	0	0	0	0	0	0	0	0	0	0	0	0	0	0	0	0	0	0	0	0	0	0	0	0	0	0	0	0	0	0	0
cph2_2	CPAR2_603440	cph2	upstream_gene_variant	5504	804948	c.-2534T>C	0	0	0	0	0	0	0	0	0	0	0	0	1	0	0	0	0	0	0	0	0	0	0	0	0	0	0	0	0	0	0	0	0	0	0	0	0	0	0	0	0	0	0
cph2_3	CPAR2_603440	cph2	upstream_gene_variant	5504	805080	c.-2402G>T	0	0	0	0	0	0	0	0	0	0	0	0	0	0	0	0	0	0	0	0	0	0	0	0	0	0	0	0	0	0	0	0	0	0	0	0	0	0	0	0	0	0	0
cph2_4	CPAR2_603440	cph2	downstream_gene_variant	5504	810050	c.*9_*10delGG	0	0	1	0	0	0	0	0	0	0	0	0	0	0	0	0	0	0	0	0	0	0	0	0	0	0	0	0	0	0	0	0	0	0	0	0	0	0	0	0	0	0	0
cph2_5	CPAR2_603440	cph2	downstream_gene_variant	5504	810225	c.*176G>A	0	0	0	0	0	0	0	0	0	0	0	0	1	0	0	0	0	0	0	0	0	0	0	0	0	0	0	0	0	0	0	0	0	0	0	0	0	0	0	0	0	0	0
cph2_6	CPAR2_603440	cph2	downstream_gene_variant	5504	811028	c.*979T>C	0	0	0	0	0	0	0	0	0	0	0	0	0	0	0	0	0	0	0	0	0	0	0	0	0	0	0	0	0	0	0	0	0	0	0	0	0	0	0	0	0	0	0
cph2_7	CPAR2_603440	cph2	downstream_gene_variant	5504	812442	c.*2393C>T	0	0	0	0	0	0	0	0	0	0	0	0	0	0	0	0	0	0	0	0	0	0	0	0	0	0	0	0	0	0	0	0	0	0	0	0	0	0	0	0	0	0	0
cph2_8	CPAR2_603440	cph2	downstream_gene_variant	5504	814641	c.*4592T>A	0	0	0	0	0	0	0	0	0	1	0	0	0	0	0	0	0	0	0	0	0	0	0	0	0	0	0	0	0	0	0	0	0	0	0	0	0	0	0	0	0	0	0
cph2_9	CPAR2_603440	cph2	upstream_gene_variant	5504	804849	c.-2633C>T	0	0	0	1	0	0	0	0	0	0	0	0	0	0	0	1	0	1	1	0	0	0	1	0	0	0	0	0	0	0	0	0	0	0	0	0	0	0	0	0	0	0	0
cph2_10	CPAR2_603440	cph2	upstream_gene_variant	5504	807262	c.-220T>A	1	1	1	1	1	1	1	1	1	1	1	1	1	1	1	1	1	1	1	1	1	1	1	1	1	1	1	1	1	1	1	1	1	1	0	1	1	1	1	0	1	0	1
cph2_11	CPAR2_603440	cph2	downstream_gene_variant	5504	810651	c.*602T>C	0	0	1	1	0	1	0	0	1	1	1	0	1	1	0	1	0	1	1	0	1	0	1	0	0	0	0	0	0	0	0	1	0	0	0	0	0	0	1	0	0	1	0
cph2_12	CPAR2_603440	cph2	downstream_gene_variant	5504	810549	c.*500G>A	0	0	0	0	0	0	0	0	0	0	0	0	0	0	0	1	0	1	0	0	0	0	1	0	0	0	0	0	0	0	0	0	0	0	0	0	0	0	0	0	0	0	0
cph2_13	CPAR2_603440	cph2	downstream_gene_variant	5504	810050	c.*10delG	0	0	0	0	0	0	0	0	0	0	0	0	0	0	1	0	0	0	0	0	0	0	0	0	0	0	0	0	0	0	0	0	0	0	0	0	0	0	0	0	0	0	0
cph2_14	CPAR2_603440	cph2	upstream_gene_variant	5504	802784	c.-4698G>A	0	0	0	0	0	0	0	0	0	0	0	0	1	0	0	0	0	0	0	0	0	0	0	0	0	0	0	0	0	0	0	0	0	0	0	0	0	0	0	0	0	0	0
cph2_15	CPAR2_603440	cph2	downstream_gene_variant	5504	814887	c.*4853T>A	0	0	0	0	0	0	0	0	0	0	0	0	0	0	1	0	0	0	0	0	0	0	0	0	0	0	0	0	0	0	0	0	0	0	0	0	0	0	0	0	1	0	0
cph2_16	CPAR2_603440	cph2	upstream_gene_variant	5504	802484	c.-4998T>C	0	0	0	0	0	0	0	0	0	0	0	0	0	0	0	0	0	0	0	0	0	0	0	0	0	0	0	0	1	0	0	0	0	0	0	0	0	0	0	0	0	0	0
cph2_17	CPAR2_603440	cph2	downstream_gene_variant	5504	811912	c.*1863T>C	0	0	0	0	0	0	0	0	0	0	0	0	0	0	0	0	0	0	0	0	0	0	0	0	0	0	0	0	0	0	0	0	0	0	0	0	0	0	0	0	0	0	0
cph2_18	CPAR2_603440	cph2	downstream_gene_variant	5504	812131	c.*2082T>C	0	0	0	1	0	0	0	0	0	0	0	0	0	0	0	1	0	1	1	0	0	0	1	0	0	0	0	0	0	0	0	0	0	0	0	0	0	0	0	0	0	0	0
czf1_1	CPAR2_501290	czf1	upstream_gene_variant	6139	294999	c.-3477_-3476insT	0	0	0	0	0	0	0	0	0	0	0	0	0	0	0	0	0	0	0	0	0	0	0	0	0	0	0	0	0	0	0	0	0	0	0	0	0	0	0	0	0	0	0
czf1_2	CPAR2_501290	czf1	upstream_gene_variant	6139	295863	c.-2626A>T	0	0	0	0	0	0	0	0	0	0	0	0	0	1	0	0	0	0	0	0	0	0	0	0	0	0	0	0	0	0	0	0	0	0	0	0	0	0	0	0	0	0	0
czf1_3	CPAR2_501290	czf1	upstream_gene_variant	6139	294138	c.-4351C>T	0	0	0	0	0	0	0	0	1	1	0	0	0	0	0	0	0	0	0	0	1	0	0	0	0	0	0	0	0	0	0	0	0	0	0	0	0	0	1	0	0	1	0
czf1_4	CPAR2_501290	czf1	upstream_gene_variant	6139	295806	c.-2683T>C	0	0	0	0	0	0	0	0	0	0	0	0	0	0	0	0	0	0	0	0	0	0	0	0	0	0	0	0	0	0	0	0	0	0	0	0	0	0	0	0	0	0	0
czf1_5	CPAR2_501290	czf1	upstream_gene_variant	6139	294999	c.-3477_-3476insTT	0	0	0	0	0	0	0	0	0	0	0	0	0	0	0	0	0	0	0	0	1	0	0	0	0	0	0	0	0	0	0	0	0	0	0	0	0	0	0	0	0	0	0
czf1_6	CPAR2_501290	czf1	downstream_gene_variant	6139	300862	c.*2032T>C	0	0	0	0	0	1	0	0	0	0	1	0	0	0	0	0	0	0	0	0	0	0	0	0	0	0	0	0	0	0	0	0	0	0	0	0	0	0	0	0	0	0	0
czf1_7	CPAR2_501290	czf1	upstream_gene_variant	6139	295838	c.-2651T>C	0	0	0	0	0	1	0	0	0	0	1	0	0	0	0	0	0	0	0	0	0	0	0	0	0	0	0	0	0	0	0	0	0	0	0	0	0	0	0	0	0	0	0
czf1_8	CPAR2_501290	czf1	upstream_gene_variant	6139	298312	c.-169delC	0	1	0	0	0	0	0	0	0	0	0	0	0	0	0	1	0	0	1	0	1	0	0	0	0	0	0	0	0	0	0	0	0	1	0	1	0	0	1	0	0	1	0
czf1_9	CPAR2_501290	czf1	downstream_gene_variant	6139	302632	c.*3802A>T	0	0	0	0	0	0	0	0	0	1	0	0	0	0	0	0	0	0	0	0	1	0	0	0	0	0	0	0	0	0	0	0	0	0	0	0	0	0	1	0	0	0	0
efg1_1	CPAR2_701620	efg1	missense_variant	6110	342626	p.Glu452Gly/c.1355A>G	0	0	1	1	0	1	0	0	1	1	1	0	1	1	0	1	0	1	1	0	1	0	1	0	0	0	0	0	0	0	0	1	0	0	0	0	0	0	1	0	0	1	0
efg1_2	CPAR2_701620	efg1	upstream_gene_variant	6110	339872	c.-1400G>A	0	0	1	0	0	0	0	0	0	0	1	0	1	1	0	0	0	0	0	0	0	0	0	0	0	0	0	0	0	0	0	0	0	0	0	0	0	0	0	0	0	0	0
efg1_3	CPAR2_701620	efg1	upstream_gene_variant	6110	340017	c.-1255C>T	0	0	0	0	0	0	0	0	1	1	0	0	0	0	0	0	0	0	0	0	1	0	0	0	0	0	0	0	0	0	0	0	0	0	0	0	0	0	1	0	0	1	0
efg1_4	CPAR2_701620	efg1	upstream_gene_variant	6110	336629	c.-4643C>A	0	0	0	0	0	0	0	0	1	0	0	0	0	0	0	0	0	0	0	0	0	0	0	0	0	0	0	0	0	0	0	0	0	0	0	0	0	0	0	0	0	0	0
efg1_5	CPAR2_701620	efg1	downstream_gene_variant	6110	345247	c.*2497G>A	0	0	0	0	0	0	0	0	0	0	0	0	0	0	0	1	0	1	0	0	0	0	1	0	0	0	0	0	0	0	0	0	0	0	0	0	0	0	0	0	0	0	0
efg1_6	CPAR2_701620	efg1	downstream_gene_variant	6110	346447	c.*3697T>C	1	1	0	0	1	0	0	1	0	0	0	1	0	0	0	0	1	0	0	1	0	0	0	1	1	1	0	0	0	1	1	0	0	1	1	1	1	0	0	1	0	0	1
efg1_7	CPAR2_701620	efg1	missense_variant	6110	342108	p.Ile280Leu/c.837_838delGAinsAT	0	0	0	1	0	0	0	0	0	0	0	0	0	0	0	1	0	1	1	0	0	0	1	0	0	0	0	0	0	0	0	0	0	0	0	0	0	0	0	0	0	0	0
efg1_8	CPAR2_701620	efg1	downstream_gene_variant	6110	344339	c.*1589T>C	0	0	0	0	0	0	0	0	0	0	0	0	0	0	1	0	0	0	0	0	0	1	0	0	0	0	0	0	0	0	0	0	1	0	0	0	0	1	0	0	1	0	0
efg1_9	CPAR2_701620	efg1	upstream_gene_variant	6110	339914	c.-1352_-1351delGA	0	0	0	0	0	0	0	0	0	0	0	0	0	0	0	0	0	0	0	0	0	0	0	0	0	0	1	0	0	0	0	0	0	0	0	0	0	0	0	0	0	0	0
efg1_10	CPAR2_701620	efg1	upstream_gene_variant	6110	339209	c.-2063C>T	0	0	0	0	0	0	0	0	0	0	0	0	1	1	0	0	0	0	0	0	0	0	0	0	0	0	0	0	0	0	0	0	0	0	0	0	0	0	0	0	0	0	0
efg1_11	CPAR2_701620	efg1	upstream_gene_variant	6110	339852	c.-1420C>A	0	0	0	0	0	0	0	0	1	1	0	0	0	0	0	0	0	0	0	0	1	0	0	0	0	0	0	0	0	0	0	0	0	0	0	0	0	0	1	0	0	1	0
efg1_12	CPAR2_701620	efg1	synonymous_variant	6110	342291	p.Gly340Gly/c.1020A>T	0	0	0	0	0	1	0	0	0	0	1	0	0	0	0	0	0	0	0	0	0	0	0	0	0	0	0	0	0	0	0	0	0	0	0	0	0	0	0	0	0	0	0
efg1_13	CPAR2_701620	efg1	missense_variant	6110	342110	p.Ile280Thr/c.839T>C	1	1	0	0	1	0	0	1	0	0	0	1	0	0	0	0	1	0	0	1	0	0	0	1	1	1	0	1	0	1	1	0	0	1	1	1	1	0	0	1	0	0	1
efg1_14	CPAR2_701620	efg1	upstream_gene_variant	6110	339793	c.-1467delT	0	0	0	0	0	0	0	0	0	0	0	0	0	0	0	0	0	0	0	0	1	0	0	0	0	0	0	0	0	0	0	0	0	0	0	0	0	0	0	0	0	0	0
hwp1_1	CPAR2_403520	hwp1	synonymous_variant	6372	769661	p.Asn719Asn/c.2157C>T	0	0	0	0	0	0	0	0	0	0	0	0	0	0	0	0	0	0	1	0	0	1	0	0	0	0	0	0	0	0	0	0	0	0	0	0	0	0	0	0	0	1	1
hwp1_2	CPAR2_403520	hwp1	downstream_gene_variant	6372	764708	c.*3405C>T	0	0	0	0	0	0	0	0	0	0	0	0	0	0	0	0	0	0	0	0	0	0	0	0	0	0	0	0	0	0	0	0	0	0	0	0	0	0	0	0	0	0	0
hwp1_3	CPAR2_403520	hwp1	synonymous_variant	6372	770912	p.Pro301Pro/c.903A>T	0	0	0	0	0	0	0	0	0	0	0	0	0	0	0	0	0	0	1	0	0	1	0	0	0	0	0	0	0	0	0	0	0	0	0	0	0	0	0	0	1	0	0
hwp1_4	CPAR2_403520	hwp1	missense_variant	6372	768441	p.Glu1126Gly/c.3377A>G	0	0	0	0	0	0	0	0	0	0	0	0	0	0	0	0	0	0	0	0	0	1	0	0	0	0	0	0	0	0	0	0	1	0	0	0	0	1	0	0	0	0	0
hwp1_5	CPAR2_403520	hwp1	synonymous_variant	6372	770723	p.Pro365Pro/c.1095A>T	0	0	0	0	0	0	0	0	1	0	0	0	0	0	0	0	0	0	0	0	1	0	0	0	0	0	0	0	0	0	0	0	0	0	0	0	0	0	1	0	0	0	0
hwp1_6	CPAR2_403520	hwp1	missense_variant	6372	771583	p.Ile79Val/c.235A>G	0	0	0	0	0	0	0	0	0	0	0	0	0	0	1	0	0	0	0	0	0	1	0	0	0	0	0	0	0	0	0	0	1	0	0	0	0	1	0	0	1	0	0
hwp1_7	CPAR2_403520	hwp1	upstream_gene_variant	6372	775300	c.-3483C>T	0	0	0	0	0	0	0	0	1	1	0	0	0	0	0	0	0	0	0	0	1	0	0	0	0	0	0	0	0	0	0	0	0	0	0	0	0	0	1	0	0	1	0
hwp1_8	CPAR2_403520	hwp1	missense_variant	6372	770436	p.Leu461Ser/c.1382T>C	0	0	0	0	0	0	0	0	0	0	0	0	0	0	0	0	0	0	0	0	0	0	0	0	0	0	0	0	0	0	0	0	0	0	0	0	0	0	0	0	0	1	0
hwp1_9	CPAR2_403520	hwp1	synonymous_variant	6372	770906	p.Glu304Glu/c.912A>G	0	0	0	0	1	1	0	0	0	0	0	0	0	0	0	0	0	0	0	0	0	0	0	0	1	0	0	0	0	0	0	0	0	0	1	0	0	0	0	0	0	0	0
mkc1_1	CPAR2_800090	mkc1	missense_variant	5807	19566	p.Gly478Arg/c.1432G>A	0	0	1	0	0	0	0	0	0	0	0	0	0	0	0	0	0	0	0	0	0	0	0	0	0	0	0	0	0	0	0	1	0	0	0	0	0	0	0	0	0	0	0
mkc1_2	CPAR2_800090	mkc1	downstream_gene_variant	5807	24125	c.*4515_*4516delGGinsAA	0	0	0	0	0	0	0	0	0	0	0	0	0	0	0	0	0	0	0	0	0	0	0	0	0	0	0	0	0	0	0	0	0	0	0	0	0	0	0	0	0	0	0
mkc1_3	CPAR2_800090	mkc1	downstream_gene_variant	5807	23640	c.*4030C>T	0	0	0	0	0	0	0	0	1	1	0	0	0	0	0	0	0	0	0	0	1	0	0	0	0	0	0	0	0	0	0	0	0	0	0	0	0	0	1	0	0	1	0
mkc1_4	CPAR2_800090	mkc1	upstream_gene_variant	5807	14664	c.-3471T>A	0	0	0	0	0	0	0	0	1	1	0	0	0	0	0	0	0	0	0	0	1	0	0	0	0	0	0	0	0	0	0	0	0	0	0	0	0	0	1	0	0	1	0
mkc1_5	CPAR2_800090	mkc1	downstream_gene_variant	5807	20650	c.*1040T>G	0	0	0	0	0	0	0	0	0	0	0	0	0	0	0	0	0	0	0	0	0	0	0	0	0	0	1	0	0	0	0	0	0	0	0	0	0	0	0	0	0	0	0
mkc1_6	CPAR2_800090	mkc1	missense_variant	5807	19054	p.Ala307Val/c.920C>T	0	0	0	0	0	0	0	0	0	0	0	0	1	1	0	0	0	0	0	0	0	0	0	0	0	0	0	0	0	0	0	0	0	0	0	0	0	0	0	0	0	0	0
mkc1_7	CPAR2_800090	mkc1	upstream_gene_variant	5807	13411	c.-4706_-4705delTA	0	0	0	0	0	0	0	0	0	0	0	0	0	0	0	1	0	1	1	0	1	0	0	0	0	0	0	0	0	0	0	0	0	0	0	0	0	0	0	0	0	1	0
mkc1_8	CPAR2_800090	mkc1	downstream_gene_variant	5807	24228	c.*4618T>C	0	0	1	1	0	1	0	0	1	1	1	0	1	1	1	1	0	1	1	0	1	1	1	0	0	0	0	0	0	0	0	1	1	0	0	0	0	1	1	0	1	1	0
mkc1_9	CPAR2_800090	mkc1	upstream_gene_variant	5807	16210	c.-1925A>G	0	0	0	0	0	0	0	0	0	0	0	0	0	0	0	0	0	0	0	0	0	0	0	0	0	0	0	0	0	0	0	0	0	0	0	0	0	0	0	0	0	0	0
mkc1_10	CPAR2_800090	mkc1	upstream_gene_variant	5807	15318	c.-2817A>C	0	0	0	0	0	1	0	0	1	0	0	0	0	0	0	0	0	0	0	0	1	0	0	0	0	0	0	0	0	0	0	0	0	0	0	0	0	0	1	0	0	1	0
nrg1_1	CPAR2_300790	nrg1	upstream_gene_variant	5806	161607	c.-1569_-1568delGGinsAA	0	0	0	1	0	0	0	0	0	0	0	0	0	0	0	1	0	1	0	0	0	0	1	0	0	0	0	0	0	0	0	0	0	0	0	0	0	0	0	0	0	0	0
nrg1_2	CPAR2_300790	nrg1	upstream_gene_variant	5806	161937	c.-1912delT	0	0	0	0	0	1	0	0	0	1	0	0	0	0	0	0	0	0	1	0	0	0	1	0	0	0	0	0	0	0	0	0	0	0	0	0	0	1	1	0	1	1	0
nrg1_3	CPAR2_300790	nrg1	upstream_gene_variant	5806	163875	c.-3836C>T	0	0	0	1	0	0	0	0	0	0	0	0	0	0	0	1	0	1	1	0	0	0	1	0	0	0	0	0	0	0	0	0	0	0	0	0	0	0	0	0	0	0	0
nrg1_4	CPAR2_300790	nrg1	upstream_gene_variant	5806	161450	c.-1411G>A	0	0	0	0	0	0	0	0	0	0	0	0	1	0	0	0	0	0	0	0	0	0	0	0	0	0	0	0	0	0	0	0	0	0	0	0	0	0	0	0	0	0	0
nrg1_5	CPAR2_300790	nrg1	downstream_gene_variant	5806	154087	c.*4861T>C	0	0	0	0	0	0	0	0	0	0	0	0	0	0	0	0	0	0	0	0	0	0	0	0	0	0	0	0	0	0	0	0	0	0	0	0	0	0	0	0	0	0	0
nrg1_6	CPAR2_300790	nrg1	downstream_gene_variant	5806	155461	c.*3487G>T	0	0	0	1	0	0	0	0	0	0	0	0	0	0	0	1	0	1	1	0	0	0	1	0	0	0	0	0	0	0	0	0	0	0	0	0	0	0	0	0	0	0	0
nrg1_7	CPAR2_300790	nrg1	upstream_gene_variant	5806	161420	c.-1381G>A	0	0	0	0	0	1	0	0	0	0	1	0	0	0	0	0	0	0	0	0	0	0	0	0	0	0	0	0	0	0	0	0	0	0	0	0	0	0	0	0	0	0	0
nrg1_8	CPAR2_300790	nrg1	downstream_gene_variant	5806	155664	c.*3284T>C	0	0	0	0	0	0	0	0	0	0	0	0	1	0	0	0	0	0	0	0	0	0	0	0	0	0	0	0	0	0	0	0	0	0	0	0	0	0	0	0	0	0	0
nrg1_9	CPAR2_300790	nrg1	downstream_gene_variant	5806	156777	c.*2171G>T	0	0	0	0	0	0	0	0	0	0	0	0	1	0	0	0	0	0	0	0	0	0	0	0	0	0	0	0	0	0	0	0	0	0	0	0	0	0	0	0	0	0	0
nrg1_10	CPAR2_300790	nrg1	upstream_gene_variant	5806	162928	c.-2889A>G	0	0	1	0	0	1	0	0	0	0	1	0	1	1	0	0	0	0	0	0	0	0	0	0	0	0	0	0	0	0	0	1	0	0	0	0	0	0	0	0	0	0	0
nrg1_11	CPAR2_300790	nrg1	upstream_gene_variant	5806	162614	c.-2578_-2576delAAT	0	0	0	0	0	1	0	0	0	0	1	0	0	0	0	0	0	0	0	0	0	0	0	0	0	0	0	0	0	0	0	0	0	0	0	0	0	0	0	0	0	0	0
nrg1_12	CPAR2_300790	nrg1	downstream_gene_variant	5806	154383	c.*4565G>A	0	0	0	0	0	0	0	0	0	0	0	0	1	0	0	0	0	0	0	0	0	0	0	0	0	0	0	0	0	0	0	0	0	0	0	0	0	0	0	0	0	0	0
nrg1_13	CPAR2_300790	nrg1	upstream_gene_variant	5806	162525	c.-2486G>A	0	0	1	0	0	0	0	0	0	0	0	0	0	0	0	0	0	0	0	0	0	0	0	0	0	0	0	0	0	0	0	1	0	0	0	0	0	0	0	0	0	0	0
rbt1_1	CPAR2_403510	rbt1	downstream_gene_variant	6372	758853	c.*2652A>C	0	0	1	1	0	1	1	0	1	1	1	0	1	1	1	1	0	1	1	0	1	1	1	0	0	0	1	0	0	0	0	0	1	0	0	0	0	1	1	0	1	1	0
rbt1_2	CPAR2_403510	rbt1	upstream_gene_variant	6372	768441	c.-4498A>G	0	0	0	0	0	0	0	0	0	0	0	0	0	0	0	0	0	0	0	0	0	1	0	0	0	0	0	0	0	0	0	0	1	0	0	0	0	1	0	0	0	0	0
rbt1_3	CPAR2_403510	rbt1	missense_variant	6372	762355	p.Ile530Thr/c.1589T>C	0	0	0	0	0	0	0	0	1	1	0	0	0	0	0	0	0	0	0	0	1	0	0	0	0	0	0	0	0	0	0	0	0	0	0	0	0	0	1	0	0	1	0
rbt1_4	CPAR2_403510	rbt1	downstream_gene_variant	6372	759893	c.*1612T>G	0	0	0	0	0	0	0	0	0	1	0	0	0	0	0	0	0	0	0	0	0	0	0	0	0	0	0	0	0	0	0	0	0	0	0	0	0	0	0	0	0	0	0
rbt1_5	CPAR2_403510	rbt1	missense_variant	6372	761656	p.Val763Thr/c.2287_2288delGTinsAC	0	0	0	0	0	0	0	0	0	0	0	0	1	0	0	0	0	0	0	0	0	0	0	0	0	0	0	0	0	0	0	0	0	0	0	0	0	0	0	0	0	0	0
rbt1_6	CPAR2_403510	rbt1	downstream_gene_variant	6372	758624	c.*2881C>T	0	0	0	0	0	0	0	0	1	1	0	0	0	0	0	0	0	0	0	0	1	0	0	0	0	0	0	0	0	0	0	0	0	0	0	0	0	0	1	0	0	1	0
rbt1_7	CPAR2_403510	rbt1	synonymous_variant	6372	762510	p.Ser478Ser/c.1434A>T	0	0	0	0	0	0	0	0	0	0	0	0	0	0	0	1	0	1	1	0	0	0	1	0	0	0	0	0	0	0	0	0	0	0	0	0	0	0	0	0	0	0	0
rbt1_8	CPAR2_403510	rbt1	downstream_gene_variant	6372	760254	c.*1251T>C	0	0	0	0	0	0	0	0	0	0	0	0	1	0	0	0	0	0	0	0	0	0	0	0	0	0	0	0	0	0	0	0	0	0	0	0	0	0	0	0	0	0	0
rbt1_9	CPAR2_403510	rbt1	synonymous_variant	6372	762783	p.Thr387Thr/c.1161C>T	0	0	0	0	0	0	0	0	0	0	0	0	0	0	0	0	0	0	0	0	1	0	0	0	0	0	0	0	0	0	0	0	0	0	0	0	0	0	0	0	0	0	0
rbt1_10	CPAR2_403510	rbt1	downstream_gene_variant	6372	757657	c.*3848G>A	0	0	0	0	0	0	0	0	0	0	0	0	0	1	0	0	0	0	0	0	0	0	0	0	0	0	0	0	0	0	0	0	0	0	0	0	0	0	0	0	0	0	0
rbt1_11	CPAR2_403510	rbt1	downstream_gene_variant	6372	756582	c.*4923T>C	0	0	1	1	0	1	0	0	1	1	1	0	1	1	0	1	0	1	1	0	1	0	1	0	0	0	0	0	0	0	0	0	0	0	0	0	0	0	1	0	0	1	0
rbt1_12	CPAR2_403510	rbt1	missense_variant	6372	762707	p.Thr413Pro/c.1236_1237delCAinsTC	0	0	0	0	0	0	0	0	0	0	0	0	0	0	0	0	0	0	0	0	0	0	1	0	0	0	0	0	0	0	0	0	0	0	0	0	0	0	0	0	0	0	0
rbt1_13	CPAR2_403510	rbt1	upstream_gene_variant	6372	764708	c.-765C>T	0	0	0	0	0	0	0	0	0	0	0	0	0	0	0	0	0	0	0	0	0	0	0	0	0	0	0	0	0	0	0	0	0	0	0	0	0	0	0	0	0	0	0
sapp1_1	CPAR2_102410	sapp1	upstream_gene_variant	5569	559778	c.-2234A>G	0	0	0	1	0	0	0	0	0	0	0	0	0	0	0	1	0	1	1	0	0	0	1	0	0	0	0	0	0	0	0	0	0	0	0	0	0	0	0	0	0	0	0
sapp1_2	CPAR2_102410	sapp1	downstream_gene_variant	5569	553071	c.*3268C>A	0	0	0	1	0	0	0	0	0	0	0	0	0	0	0	1	0	1	1	0	0	0	1	0	0	0	0	0	0	0	0	0	0	0	0	0	0	0	0	0	0	0	0
sapp1_3	CPAR2_102410	sapp1	upstream_gene_variant	5569	559013	c.-1469C>T	0	0	0	0	0	0	0	0	1	1	0	0	0	0	1	1	0	1	1	0	1	1	1	0	0	0	0	0	0	0	0	0	1	0	0	0	0	1	0	0	1	0	0
sapp1_4	CPAR2_102410	sapp1	upstream_gene_variant	5569	560226	c.-2682G>A	0	0	0	0	0	0	0	0	0	0	0	0	1	0	0	0	0	0	0	0	0	0	0	0	0	0	0	0	0	0	0	0	0	0	0	0	0	0	0	0	0	0	0
sapp1_5	CPAR2_102410	sapp1	downstream_gene_variant	5569	555086	c.*1253T>C	0	0	0	0	0	0	0	0	0	0	0	0	0	0	0	0	0	0	0	0	0	0	0	0	0	0	0	0	0	0	0	0	0	0	0	0	0	0	0	0	0	0	0
sapp1_6	CPAR2_102410	sapp1	downstream_gene_variant	5569	555056	c.*1283G>T	0	0	0	0	0	0	0	0	0	0	0	0	0	0	0	0	0	0	0	0	0	0	0	0	0	0	0	0	0	0	0	0	0	0	0	0	0	0	0	0	0	0	0
sapp1_7	CPAR2_102410	sapp1	downstream_gene_variant	5569	553951	c.*2388G>A	0	0	0	0	0	0	0	0	0	0	0	0	0	0	1	0	0	0	0	0	0	1	0	0	0	0	0	0	0	0	0	0	1	0	0	0	0	1	0	0	1	0	0
sapp1_8	CPAR2_102410	sapp1	synonymous_variant	5569	556366	p.Thr393Thr/c.1179C>T	0	0	0	0	0	0	0	0	1	1	0	0	0	0	0	0	0	0	0	0	1	0	0	0	0	0	0	0	0	0	0	0	0	0	0	0	0	0	1	0	0	1	0
sapp1_9	CPAR2_102410	sapp1	upstream_gene_variant	5569	561056	c.-3512G>A	0	0	0	0	0	0	0	0	0	0	0	0	1	0	0	0	0	0	0	0	0	0	0	0	0	0	0	0	0	0	0	0	0	0	0	0	0	0	0	0	0	0	0
sapp1_10	CPAR2_102410	sapp1	upstream_gene_variant	5569	561114	c.-3570G>A	0	0	0	0	0	1	0	0	0	0	1	0	0	0	0	0	0	0	0	0	0	0	0	0	0	0	0	0	0	0	0	0	0	0	0	0	0	0	0	0	0	0	0
sapp2_1	CPAR2_102580	sapp2	downstream_gene_variant	5569	586022	c.*2904T>C	0	0	0	0	0	0	0	0	0	0	1	0	0	0	0	0	0	0	0	0	0	0	0	0	0	0	0	0	0	0	0	0	0	0	0	0	0	0	0	0	0	0	0
sapp2_2	CPAR2_102580	sapp2	downstream_gene_variant	5569	584991	c.*3935C>T	0	0	0	0	0	0	0	0	0	0	0	0	0	0	0	0	0	0	0	0	0	0	0	0	0	0	0	0	0	0	0	0	0	0	0	0	0	0	0	0	0	0	0
sapp2_3	CPAR2_102580	sapp2	downstream_gene_variant	5569	584607	c.*4319C>T	0	0	0	1	0	0	0	0	0	0	0	0	0	0	0	1	0	1	1	0	0	0	1	0	0	0	0	0	0	0	0	0	0	0	0	0	0	0	0	0	0	0	0
sapp2_4	CPAR2_102580	sapp2	downstream_gene_variant	5569	587055	c.*1871T>C	0	0	0	0	0	0	0	0	0	0	0	0	0	0	0	0	0	0	0	0	0	0	0	0	0	0	0	0	0	0	0	0	0	0	0	0	0	0	0	0	0	0	0
sapp2_5	CPAR2_102580	sapp2	downstream_gene_variant	5569	585387	c.*3537delT	0	0	0	0	0	0	0	0	1	1	0	0	0	0	0	0	0	0	0	0	0	0	0	0	0	0	0	0	0	0	0	0	0	0	0	0	0	0	0	0	0	0	0
sapp2_6	CPAR2_102580	sapp2	upstream_gene_variant	5569	591225	c.-1082G>A	0	0	0	0	0	0	0	0	0	0	0	0	1	0	0	0	0	0	0	0	0	0	0	0	0	0	0	0	0	0	0	0	0	0	0	0	0	0	0	0	0	0	0
sapp2_7	CPAR2_102580	sapp2	downstream_gene_variant	5569	588075	c.*851C>T	0	0	0	0	0	1	0	0	0	0	1	0	0	0	0	0	0	0	0	0	0	0	0	0	0	0	0	0	0	0	0	0	0	0	0	0	0	0	0	0	0	0	0
sapp3_1	CPAR2_102420	sapp3	upstream_gene_variant	5569	556366	c.-3673G>A	0	0	0	0	0	0	0	0	1	1	0	0	0	0	0	0	0	0	0	0	1	0	0	0	0	0	0	0	0	0	0	0	0	0	0	0	0	0	1	0	0	1	0
sapp3_2	CPAR2_102420	sapp3	missense_variant	5569	561114	p.Thr359Ile/c.1076C>T	0	0	0	0	0	1	0	0	0	0	1	0	0	0	0	0	0	0	0	0	0	0	0	0	0	0	0	0	0	0	0	0	0	0	0	0	0	0	0	0	0	0	0
sapp3_3	CPAR2_102420	sapp3	downstream_gene_variant	5569	562703	c.*1471G>A	0	0	0	0	0	0	0	0	1	0	0	0	0	0	0	0	0	0	0	0	0	0	0	0	0	0	0	0	0	0	0	0	0	0	0	0	0	0	0	0	0	0	0
sapp3_4	CPAR2_102420	sapp3	upstream_gene_variant	5569	559013	c.-1026G>A	0	0	0	0	0	0	0	0	1	1	0	0	0	0	1	1	0	1	1	0	1	1	1	0	0	0	0	0	0	0	0	0	1	0	0	0	0	1	0	0	1	0	0
sapp3_5	CPAR2_102420	sapp3	upstream_gene_variant	5569	559778	c.-261T>C	0	0	0	1	0	0	0	0	0	0	0	0	0	0	0	1	0	1	1	0	0	0	1	0	0	0	0	0	0	0	0	0	0	0	0	0	0	0	0	0	0	0	0
sapp3_6	CPAR2_102420	sapp3	downstream_gene_variant	5569	565075	c.*3843A>C	1	1	1	1	1	1	1	1	1	1	1	1	1	1	1	1	1	1	1	1	1	1	1	1	1	1	1	1	1	0	1	1	1	1	1	1	1	1	1	1	1	1	1
sapp3_7	CPAR2_102420	sapp3	upstream_gene_variant	5569	555056	c.-4983C>A	0	0	0	0	0	0	0	0	0	0	0	0	0	0	0	0	0	0	0	0	0	0	0	0	0	0	0	0	0	0	0	0	0	0	0	0	0	0	0	0	0	0	0
sapp3_8	CPAR2_102420	sapp3	upstream_gene_variant	5569	555086	c.-4953A>G	0	0	0	0	0	0	0	0	0	0	0	0	0	0	0	0	0	0	0	0	0	0	0	0	0	0	0	0	0	0	0	0	0	0	0	0	0	0	0	0	0	0	0
sapp3_9	CPAR2_102420	sapp3	missense_variant	5569	560226	p.Ser63Leu/c.188C>T	0	0	0	0	0	0	0	0	0	0	0	0	1	0	0	0	0	0	0	0	0	0	0	0	0	0	0	0	0	0	0	0	0	0	0	0	0	0	0	0	0	0	0
sapp3_10	CPAR2_102420	sapp3	stop_gained	5569	561056	p.Gln340*/c.1018C>T	0	0	0	0	0	0	0	0	0	0	0	0	1	0	0	0	0	0	0	0	0	0	0	0	0	0	0	0	0	0	0	0	0	0	0	0	0	0	0	0	0	0	0
[truncated: 8 more columns]

## Sheet: TableS7-GWAS
Table S7. SNPs identified showing association with antifungal susceptibility.
Drug	Method	PC	SNP	P.value	MAF	nobs	H&B.P.Value	Effect
FLU	FarmCPU	5	SNW_023503281.1_2637591	3.1e-30	0.0217391	46	5.98e-26	97.5415
			SNW_023503278.1_1560502	6.02e-29	0.0434783	46	5.82e-25	98.4166
			SNW_023503277.1_30338	4.1e-28	0.0434783	46	2.64e-24	-48.3699
			SNW_023503278.1_550010	8.18e-22	0.195652	46	3.95e-18	27.9745
			SNW_023503284.1_252223	2e-15	0.0217391	46	7.73e-12	-21.8439
			SNW_023503280.1_1483690	6.91e-09	0.0217391	46	1.34e-05	-8.26516
			SNW_023503281.1_748745	6.91e-09	0.0217391	46	1.34e-05	-8.26516
			SNW_023503281.1_1627857	6.91e-09	0.0217391	46	1.34e-05	-8.26516
			SNW_023503281.1_2374745	6.91e-09	0.0217391	46	1.34e-05	-8.26516
			SNW_023503281.1_2374752	6.91e-09	0.0217391	46	1.34e-05	-8.26516
			SNW_023503281.1_1698421	2.55e-08	0.0217391	46	3.79e-05	-15.5006
			SNW_023503281.1_1698432	2.55e-08	0.0434783	46	3.79e-05	-7.75029
			SNW_023503283.1_511022	2.35e-08	0.0434783	46	3.79e-05	-8.06879
			SNW_023503283.1_1070076	5.5e-08	0.0543478	46	7.59e-05	-14.2724
Fc	BLINK	2	SNW_023503283.1_1068884	2.95e-27	0.0540541	37	5.7e-23	-0.467047
			SNW_023503283.1_342413	5.26e-15	0.0135135	37	5.09e-11	0.405711
Cs	FarmCPU	8	SNW_023503277.1_292706	1.14e-30	0.0208333	48	2.21e-26	2.43193
			SNW_023503278.1_283642	1.34e-07	0.291667	48	0.00128685	0.876389
			SNW_023503278.1_1215491	2e-07	0.385417	48	0.00128685	0.258293
			SNW_023503283.1_1068903	9.69e-07	0.0520833	48	0.00467902	-0.261041

## Sheet: TableS8-CNV-samtools
TableS8. CNV estimation of 50 panel genes associated with resistance and adaptations, across 51 samples using samtools depth approach (CNV > 2 are highlighted)
SampleName\ Gene name	ACE2	ARR3	BCR1	CDR1	CDR2	CPH2	CZF1	EFG1	ERG11	ERG2	ERG20	ERG24	ERG25	ERG26	ERG27	ERG28	ERG29	ERG3	ERG5	ERG6	ERG7	FKS1	FKS2	FUR1	GZF3	HOG1	HWP1	LIP1	LIP2	MDR1	MKC1	MLH1	MRR1	MSH2	NDT80	NRG1	PDR1	PMS1	RBT1	RTA3	SAPP1	SAPP2	SAPP3	SPT3	STE6	tac1b	TEC1	UME6	UPC2
Gene ID	CPAR2_204370	CPAR2_601050	CPAR2_205990	CPAR2_405290	CPAR2_401370	CPAR2_603440	CPAR2_501290	CPAR2_701620	CPAR2_303740	CPAR2_201490	CPAR2_103950	CPAR2_405900	CPAR2_801410	CPAR2_302110	CPAR2_801560	CPAR2_213750	CPAR2_302020	CPAR2_105550	CPAR2_703970	CPAR2_405010	CPAR2_301800	CPAR2_106400	CPAR2_804030	CPAR2_502030	CPAR2_800210	CPAR2_211840	CPAR2_403520	CPAR2_703190	CPAG_04676	CPAR2_301760	CPAR2_800090	CPAR2_401150	CPAR2_807270	CPAR2_500160	CPAR2_213640	CPAR2_300790	CPAR2_102000	CPAR2_806260	CPAR2_403510	CPAR2_104610	CPAR2_102410	CPAR2_102580	CPAR2_102420	CPAR2_200390	CPAR2_404230	CPAR2_303520	CPAR2_805930	CPAR2_803820	CPAR2_207280
CPARA5_S51.	0.689885	6.04692	0.676373	0.643624	0.694822	1.24238	0.966111	0.540939	4.509	1.18593	0.689146	0.710006	0.940222	0.730321	1.15458	1.74075	0.972043	0.921356	0.971512	0.522491	0.794644	0.679432	0.796082	0.575773	1.42695	0.864045	0.576017	2.0417	2.47844	0.833613	1.35346	0.970034	0.856164	1.35097	1.12587	0.65682	0.737801	0.852527	0.540442	0.858499	1.54662	1.33046	0.849566	1.27365	0.729135	0.787708	0.651143	0.75689	0.758074
CPARA20_S71.	0.705437	5.67818	0.796959	0.688483	0.76729	1.03019	1.16336	0.64483	1.03522	1.00354	0.711985	0.700177	0.924938	0.903441	1.01661	1.28282	0.783767	0.732424	1.01549	0.537061	0.898752	0.683657	0.811764	0.863597	1.31948	0.934331	0.445836	1.99499	2.37802	0.794134	1.03391	0.789088	0.895306	1.24248	1.10559	0.902661	0.79746	0.902734	0.587628	0.621553	1.57596	1.30869	0.985523	1.08015	0.685753	0.854861	0.674857	0.82556	0.739212
CPARA23_M201.	0.719554	4.16192	0.777953	0.688091	0.852895	1.26318	1.01192	0.587785	0.961356	1.27971	0.673953	0.698154	0.882665	0.745537	1.10618	1.62619	0.833118	0.691004	1.09959	0.545921	0.832693	0.677883	0.797828	0.784552	1.72925	0.875192	0.453667	1.79772	2.26134	0.815467	1.38271	0.866829	0.943993	1.40025	1.14705	0.820868	0.800266	0.794132	0.628011	6.735	1.66633	1.20801	1.02374	1.61522	0.727604	0.852795	0.634433	0.846302	0.812831
CPARA2_S21.	0.723453	2.62801	0.792976	0.591728	0.865446	1.29835	0.834927	0.63524	4.60221	1.27122	0.696851	0.648661	1.00928	0.757291	1.03147	1.51909	0.708317	0.697809	0.980015	0.492195	0.767855	0.658309	0.768838	0.818365	1.70826	0.867408	0.529333	1.94145	2.19806	0.751298	1.39602	0.950718	0.826505	1.35036	1.34803	0.924333	0.793226	0.725802	0.529212	0.696525	1.59925	1.30601	0.828172	1.51398	0.713691	0.800096	0.666934	0.785088	0.793201
CPARA17_S41.	0.761745	1.18049	0.738356	0.710309	0.83886	1.13744	0.78323	0.645795	1.06669	1.34567	0.574922	0.763214	1.00283	0.927767	1.18613	1.34154	0.827211	0.705504	0.915547	0.603186	0.88924	0.67247	0.790762	0.895264	1.63404	0.939653	0.52217	1.7711	2.19047	0.755956	1.27336	0.900642	0.857705	1.2141	1.16812	0.719445	0.886316	0.772467	0.646639	0.656703	1.77321	1.38113	1.04581	1.36066	0.698971	0.781746	0.683372	0.793759	0.775111
CPARA12_S21.	0.75552	1.09184	0.750886	0.652997	0.83002	1.17305	0.925193	0.627534	0.93362	1.3935	0.682065	0.642792	0.852206	0.917001	1.22881	1.2682	0.833077	0.624057	1.0279	0.5553	0.819915	0.660305	0.804229	0.827031	1.67432	0.839548	0.565413	1.80007	2.11042	0.759777	1.18339	0.851877	0.869858	1.33775	1.18285	0.843543	0.865838	0.784933	0.60648	0.707955	1.68206	1.38737	1.01539	1.41361	0.745425	0.771629	0.718136	0.763163	0.772022
cvcan55_M261.	0.570299	5.50321	0.786928	0.619878	0.975473	1.23236	1.13456	0.439347	4.11452	1.39172	0.683994	0.715499	1.1169	0.631531	1.17354	2.2149	0.760982	0.835038	1.19819	0.51012	0.748627	0.598399	0.613386	0.587493	1.5604	0.85958	0.625285	1.61621	1.99525	0.861535	1.38731	1.04543	0.779125	1.20995	1.73839	1.10826	0.808476	0.687568	0.460097	0.664701	1.1284	1.00866	0.879052	1.85733	0.710356	0.855255	0.566738	0.675027	0.703244
CPARA19_S61.	0.73357	3.06729	0.798465	0.543534	0.679464	1.19586	0.91165	0.638825	6.656	1.37296	0.770103	0.650451	0.971459	0.646906	1.2424	1.41352	0.730361	0.694718	1.09971	0.552888	0.792681	0.697651	0.74939	0.792534	1.70539	0.845426	0.521239	1.66217	1.89109	0.723005	1.27555	0.913217	0.910152	1.41566	1.25142	0.846681	0.809361	0.739369	0.541273	0.747184	1.44364	1.11816	0.858124	1.60624	0.686222	0.819635	0.745302	0.690378	0.767395
CPARA1_S11.	0.758279	1.08313	0.853562	0.770498	0.816464	1.23489	1.03553	0.658151	1.07087	1.12624	0.744245	0.715205	1.03785	0.812657	1.10264	1.39343	1.00504	0.769529	1.05647	0.615938	0.854804	0.741804	0.798637	0.854531	1.29263	0.929302	0.589387	1.45878	1.85056	0.916386	1.35572	0.941197	0.889671	1.15895	1.2123	0.934545	0.851761	0.815155	0.690477	11.0056	1.52718	1.19305	0.930661	1.43227	0.793099	0.843019	0.741643	0.741203	0.818669
CPARA21_S81.	0.771801	1.15894	0.822381	0.780353	0.806791	1.01652	0.880245	0.674811	0.958406	1.01733	0.748073	0.6914	0.811828	0.798031	1.22426	1.19673	0.884797	0.739079	0.916031	0.569819	0.801239	0.764938	0.852988	0.945368	1.52476	0.872295	0.530139	1.55448	1.84664	0.771457	1.21294	0.933639	0.909761	1.33264	1.15653	0.805503	0.871683	0.833635	0.678217	0.698125	1.60321	1.13932	0.870588	1.45086	0.770829	0.890608	0.78823	0.908452	0.937854
CPARA3_S31.	0.811663	5.79787	0.853138	0.687875	0.775147	1.09682	1.00053	0.611467	4.9606	1.28416	0.730624	0.742256	0.953895	0.842644	1.04799	1.16624	1.01685	0.839211	0.967384	0.607458	0.729009	0.76367	0.857497	0.728132	1.67038	0.918112	0.616015	1.54094	1.84508	0.802298	1.32981	0.956455	0.8352	1.33668	1.08867	0.714459	0.79017	0.819118	0.620562	0.700739	1.45338	1.05433	0.987346	1.46273	0.653032	0.840525	0.70886	0.80975	0.888791
CPARA6_S61.	0.765416	7.27256	0.600334	0.67143	1.1608	1.27019	0.78809	0.531453	1.09527	1.50804	0.569372	0.717844	0.901536	0.748362	1.56472	1.64301	0.751897	0.630028	1.03858	0.494722	0.812029	0.604106	0.766401	0.859689	1.60153	0.788647	0.371069	1.47028	1.8238	0.724991	1.60233	0.938915	0.929179	1.41768	1.29136	0.687143	0.82636	0.801861	0.573647	0.599161	1.38487	1.16342	0.94924	1.72517	0.632091	0.841376	0.632507	0.750505	0.787862
CPARA18_S51.	0.586506	5.09632	0.631362	0.592633	0.733592	1.15786	0.962569	0.569881	1.28503	1.45966	0.616757	0.701504	0.910938	0.568533	1.22422	1.62594	0.728708	0.426116	0.97467	0.474648	0.695033	0.546809	0.626851	0.754444	2.11443	0.857725	0.323164	1.5785	1.78154	0.633974	1.65606	0.889178	0.773439	1.50223	1.53027	0.847308	0.797944	0.678556	0.54422	0.469146	1.42019	1.17271	0.747421	1.95549	0.615686	0.772846	0.655142	0.684707	0.659485
CPARA16_S31.	0.974108	5.87488	0.743766	0.748413	0.750734	1.14296	0.84995	0.622242	3.84894	1.17556	0.662033	0.838873	0.892476	0.871035	1.03564	1.2024	1.05679	0.73383	0.786592	0.526525	0.939922	0.772356	0.950971	0.794555	1.69266	0.837773	0.61255	1.54205	1.78026	0.710713	1.28493	1.00013	0.872713	1.32059	1.04626	0.668182	0.778576	0.774954	0.666248	0.776603	1.59915	1.26438	0.931639	1.40904	0.734821	0.742433	0.866704	1.00483	1.0086
CPARA25_MG.	0.759618	1.16903	0.889279	0.80761	0.8758	1.19372	1.21874	0.816876	0.927036	0.929962	0.810349	0.690039	0.848015	0.81707	1.08592	1.16725	0.816928	0.754516	0.933499	0.703398	0.851623	0.771965	0.799399	0.918883	1.3505	0.891014	0.644802	1.5097	1.74111	0.732867	1.31404	0.770513	1.00188	1.27582	1.13026	1.13788	0.793386	0.772038	0.570646	3.12671	1.19354	1.16764	0.867971	1.33924	0.721549	0.872102	0.738651	0.908848	0.848858
CPARA22_S91.	0.765427	2.87503	0.815344	0.663087	0.830606	1.23978	0.929694	0.67745	5.96659	1.20846	0.690287	0.664504	0.917717	0.719815	1.04373	1.68345	0.877312	0.692902	1.03715	0.539611	0.820035	0.754538	0.887491	0.677376	1.7181	0.784725	0.561982	1.53527	1.67436	0.76825	1.56859	0.906615	0.834703	1.53929	1.19877	0.821708	0.82226	0.818588	0.698512	0.847526	1.49875	1.27233	0.798132	1.67894	0.771838	0.789888	0.720677	0.744453	0.729151
CPARA24_M211.	0.736444	1.05629	0.612064	0.706804	0.876935	1.18294	0.986619	0.577326	0.97125	1.0887	0.780061	0.69962	0.864606	0.751422	1.09863	1.34905	0.892801	0.709958	0.880052	0.556852	0.836051	0.698594	0.862588	0.61816	1.84151	0.786759	0.524227	1.42964	1.66383	0.765249	1.52633	1.04416	0.920033	1.52796	1.28742	0.809377	0.919908	0.837646	0.609962	0.687684	1.61443	1.28024	0.938892	1.636	0.774515	0.862159	0.759879	0.789517	0.875229
CORTH8.	0.627908	3.79141	0.693081	0.779885	1.10581	1.20711	0.888482	0.574674	1.22362	0.996253	0.895617	0.876751	0.855357	0.912711	1.38643	1.34508	1.06697	1.1304	0.89656	0.671897	0.847395	0.762353	0.843065	0.681347	1.19527	0.962121	0.708466	1.38921	1.63107	0.974454	1.27879	1.02905	0.941719	1.36549	1.04	0.774083	0.886655	0.90866	0.570284	3.99515	1.42903	1.1349	0.947511	1.24864	0.904015	0.954897	0.804679	0.752999	0.901605
CPARA7_S71.	0.834571	5.84341	0.831705	0.752134	0.610506	1.22769	0.863686	0.689105	4.47435	1.08215	0.803908	0.833534	0.88293	0.966368	1.39876	1.42155	0.867538	0.920727	0.894462	0.669804	0.841401	0.735403	0.906744	0.691334	1.41503	0.963055	0.622576	1.2091	1.5807	0.675456	1.46864	1.01146	0.933871	1.71267	1.18191	0.590132	0.847814	0.770839	0.60404	0.891468	1.43845	0.986267	0.966944	1.48769	0.747728	0.794367	0.745572	0.869	0.737051
CPARA8_S81.	0.72296	5.50325	0.712541	0.750625	0.792254	1.1911	0.974574	0.603197	5.4006	1.05017	0.78506	0.61557	0.869105	0.776125	1.03239	1.41438	1.04733	0.736284	0.994314	0.56398	0.791608	0.722306	0.800787	0.649979	1.64655	0.871314	0.485506	1.15953	1.56715	0.806038	1.57818	0.984676	0.851263	1.5202	1.17939	0.750113	0.844992	0.849561	0.597066	0.780991	1.35841	0.902019	0.896445	1.52639	0.78171	0.810675	0.71182	0.758958	0.736082
cvcan61_M321.	0.461096	6.67631	0.922361	0.677683	1.23625	1.10171	1.02514	0.370744	1.26924	1.53639	0.662883	0.88729	1.09192	0.66077	1.5919	2.49882	1.05672	0.873661	1.06775	0.538837	0.854358	0.563887	0.58962	0.607553	1.44933	0.873155	0.664508	1.42457	1.54803	0.893012	1.74526	1.1537	0.80365	1.25137	1.44579	1.11768	0.969625	0.711234	0.481389	7.58846	0.790312	0.929171	0.77678	1.70338	0.875616	0.937032	0.597987	0.569152	0.674824
cvcan62_M331.	0.625192	7.04157	0.811409	0.704693	1.28382	1.06523	1.24339	0.551437	1.22579	1.27201	0.815055	0.8658	1.08023	0.770315	1.29256	1.80537	1.00391	0.99634	1.108	0.742715	0.973028	0.758412	0.735211	0.717084	1.36365	0.908091	0.535812	1.40595	1.49804	0.933269	1.55619	1.12047	0.780381	1.40816	1.24927	1.03478	0.915451	0.825529	0.552968	0.86439	1.10828	1.02583	0.947428	1.62625	0.893472	0.903057	0.707162	0.664847	0.726539
CPARA4_S41.	0.868388	2.39019	0.695552	0.458169	0.732851	1.08514	0.956367	0.679263	0.961376	1.28744	0.664444	0.75538	0.895741	0.903335	1.29107	1.42936	0.917822	0.633958	0.940006	0.692735	0.824212	0.772915	0.927277	0.923628	1.46002	0.899622	0.506354	1.11221	1.35615	0.82032	1.23958	0.898076	0.871525	1.25632	1.08559	0.51723	0.755386	0.891188	0.617662	0.719329	1.37266	1.15474	0.983143	1.46595	0.866597	0.851984	0.841466	0.838898	0.756246
CPARA9_S91.	0.840564	2.93137	0.705253	0.880083	1.00818	1.20439	0.855189	0.770482	0.944744	0.970248	0.820197	0.832147	0.920365	0.934499	1.11328	1.16405	0.888527	0.733145	0.968339	0.814299	0.939381	0.794294	0.943711	1.05463	1.41289	1.0277	0.842168	1.00836	1.28841	0.805001	1.49854	0.990185	0.751138	1.20145	0.868421	0.755577	1.01638	1.05971	0.671229	4.0846	1.48535	1.21705	1.11141	1.28597	0.92037	0.741789	0.813977	0.968824	0.855179
cvcan6_M431.	0.551918	1.26763	0.796048	0.39212	0.85838	1.094	1.11513	0.499034	1.16713	1.17511	0.605358	0.87353	1.04722	0.646245	1.27567	1.52363	0.708454	0.732357	1.10375	0.570455	0.883926	0.642951	0.613117	0.814717	1.49671	0.933906	0.562826	1.07254	1.19606	0.813637	1.67485	1.06027	0.9057	1.40489	1.45103	1.05837	0.826728	0.774466	0.597796	5.76773	1.40412	1.02356	0.820159	1.82059	0.886875	0.952368	0.627199	0.614187	0.666451
cvcan26_M281.	0.749145	5.00692	0.832011	0.722889	0.769224	1.08655	0.967581	0.531738	4.6314	1.08416	0.839991	0.784047	1.17504	0.717012	1.24191	1.35471	0.759185	0.764477	1.07903	0.66853	0.916573	0.779061	0.701663	0.856678	1.61493	0.999915	0.754463	1.03979	1.1572	0.826875	1.50786	1.02942	0.942567	1.50148	1.40482	1.10721	0.864736	0.710122	0.654501	0.806512	1.16541	1.01089	0.905693	1.61882	0.864743	0.900405	0.672751	0.728247	0.77885
cvcan19_M211.	0.760239	3.5895	0.877033	0.730224	0.837997	0.985093	1.04641	0.563111	5.64701	1.16346	0.986019	0.902927	1.11584	0.670756	1.48738	1.19269	0.938935	0.696739	1.00717	0.533374	0.966189	0.751792	0.688591	0.799874	1.43774	0.980943	0.819947	1.01416	1.13345	0.849745	1.48033	0.881051	0.953487	1.59678	1.34391	0.96504	0.987001	0.857421	0.773624	0.82076	1.08602	1.00511	0.863948	1.40612	1.02922	1.4069	0.80828	0.782744	0.897514
CPARA34_S771.	0.702683	6.08379	1.08228	0.928116	0.864013	1.01282	1.08082	0.825485	4.1298	1.20467	0.775277	0.829612	0.905105	0.898112	1.24955	1.14207	0.975256	0.833818	0.927171	0.633838	1.2958	0.836471	0.79733	0.85987	1.06966	1.11422	1.02257	1.01288	1.09447	1.02584	1.26805	1.01287	0.83918	0.807094	1.33191	1.20111	0.865234	0.796614	0.682154	0.929162	1.24055	0.927943	0.924877	1.37881	0.934811	0.899166	0.746645	0.739373	0.866958
cvcan29_M311.	0.695576	1.08548	0.842616	0.889527	0.738078	1.11755	0.973674	0.585081	1.10072	0.978696	0.826796	0.818495	1.10273	0.715149	1.17566	1.16132	0.827603	0.811882	1.1047	0.662528	0.889133	0.825126	0.796888	0.799932	1.60306	1.03696	0.60999	1.02321	1.09168	0.861778	1.43565	0.943812	0.953704	1.49164	1.27302	0.998304	0.862148	0.790962	0.699832	2.81266	1.20143	1.05085	0.923074	1.603	0.861051	0.943146	0.740753	0.773814	0.840243
CPARA26_S691.	0.673422	1.37351	1.0735	1.01458	0.997676	0.9924	1.17312	0.92161	0.986649	1.21038	0.846315	0.853135	1.0951	0.948308	1.36513	1.10499	1.11978	0.901537	0.901114	0.699236	1.25605	0.886831	0.83076	0.839726	0.850704	1.12733	0.909885	1.0059	1.07217	1.13175	1.26612	0.987175	0.792412	0.779825	1.21121	1.25356	0.887115	0.792442	0.845209	1.05632	1.16465	0.962511	0.872142	1.18099	1.00557	0.94304	0.738748	0.848812	0.887108
cvcan52_M231.	0.632649	1.08462	1.01036	0.896095	1.21674	1.06173	1.19318	0.642263	1.28957	1.27897	0.673573	1.00867	1.09843	0.797939	1.15178	1.85984	0.976168	0.85429	0.956977	0.743235	0.942088	0.704517	0.649018	0.767849	1.25979	0.952983	0.546706	0.859688	1.01711	0.896152	1.76222	1.19059	0.918066	1.09056	1.34352	1.20476	0.924155	0.801198	0.575605	3.90395	0.906658	0.904634	0.857436	1.36711	0.979135	0.879474	0.671512	0.645422	0.727599
CPARA28_S711.	0.678116	1.39049	1.0243	1.02988	0.911082	0.980466	1.18689	0.897569	1.05607	1.11901	0.836884	0.806532	1.02885	0.89298	1.19795	1.16724	0.935284	0.954413	0.964945	0.740746	1.25186	0.886964	0.801723	0.906699	1.00426	1.11911	0.901354	0.92348	1.00945	1.04995	1.26834	1.05212	0.849159	0.871517	1.31075	1.25132	0.931238	0.79305	0.785349	0.879902	1.20308	0.939113	0.852217	1.32602	1.05585	1.02095	0.782243	0.783692	0.87226
CPARA33_S761.	0.627484	5.83748	1.03483	0.912813	0.916291	0.963514	1.1776	0.977006	1.06259	1.34842	0.839419	0.829698	0.995085	0.898322	1.31741	1.43243	1.00718	0.804278	0.955542	0.670517	1.2201	0.800862	0.698215	0.852646	1.03927	1.0605	0.899234	0.980217	1.00301	1.01056	1.48289	1.05773	0.845859	0.951247	1.34089	1.20861	0.900607	0.767334	0.578924	0.865508	1.1285	0.883578	0.855646	1.25304	0.996847	0.86922	0.663029	0.741102	0.811954
CPARA27_S701.	0.666015	3.88596	1.10305	0.976845	1.06694	0.907684	1.17759	0.88042	6.70954	1.25202	0.815821	0.792921	1.02043	0.942871	1.29213	1.38662	1.00005	0.930983	0.918358	0.742601	1.22523	0.811447	0.738896	0.816429	0.97727	1.00813	0.898192	0.952526	0.9988	0.981223	1.31067	0.948182	0.841313	0.910892	1.22458	1.38865	0.868295	0.807298	0.619675	0.952069	1.13259	0.84883	0.875507	1.31081	0.993593	0.866201	0.733385	0.752669	0.896117
CPARA29_S721.	0.736206	1.3783	0.991786	1.00131	0.993925	0.981277	1.15288	0.986353	1.14978	1.14227	0.881444	0.891259	1.0539	1.05873	1.26639	1.10911	1.14685	0.808105	0.968827	0.765534	1.35028	0.875931	0.840396	0.878577	0.907749	1.10948	0.871851	0.958552	0.988477	1.09738	1.28034	1.00317	0.786346	0.823617	1.19993	1.24933	0.940684	0.851196	0.847339	0.941498	1.18902	0.923866	0.844144	1.26152	1.02791	1.00832	0.795066	0.787487	0.867344
CPARA30_S731.	0.588344	1.42563	1.07654	0.920895	0.995193	0.9661	1.25782	1.03114	1.11675	1.05391	0.897757	0.798308	0.925431	0.963361	1.43424	1.23202	1.06477	0.941282	0.940762	0.71433	1.24172	0.857934	0.790919	0.838478	0.899745	1.05684	0.775763	0.974896	0.985525	1.03431	1.33443	0.975927	0.82258	0.892009	1.23838	1.20176	0.852341	0.902031	0.819981	1.03329	1.03022	0.907389	0.8992	1.28387	1.01778	0.908313	0.715793	0.77653	0.872096
cvcan33_M351.	0.910551	4.43683	1.04798	1.12866	0.501145	1.08705	0.963514	0.933729	1.15073	0.765549	0.960139	0.843465	0.852587	0.857255	0.901961	0.956196	0.541753	0.734145	1.134	0.777442	1.09755	1.05948	0.894946	0.995267	1.38922	0.931442	1.01793	0.841304	0.976382	0.750982	0.955855	0.938246	0.874021	1.02207	1.43572	1.40365	1.07163	0.717196	1.12199	1.01464	1.24116	1.04812	1.17421	1.39969	1.01723	1.05194	0.831839	1.09215	1.04235
cvcan10_M471.	0.623988	3.54645	0.952767	0.813507	0.832202	1.10594	0.946565	0.60633	7.65073	1.197	0.807326	0.757469	0.971848	0.746996	1.14046	1.41148	0.758185	0.778237	1.2129	0.660122	0.932333	0.81994	0.676858	0.774921	1.39211	1.01299	0.724915	0.922231	0.974622	0.795987	1.42081	1.04347	0.908217	1.23982	1.55593	1.3244	0.910158	0.759356	0.555164	0.822329	0.95569	0.812843	0.815539	1.90257	0.987372	0.91392	0.633912	0.675934	0.72295
CPARA31_S741.	0.704103	1.39376	1.07982	1.08055	1.02022	0.998551	1.12315	0.965888	1.08938	1.01057	0.862963	0.729129	0.912395	0.98963	1.21109	1.11498	0.992861	0.895636	0.890266	0.715589	1.31332	0.918033	0.84381	0.898375	1.01408	1.07592	0.781537	0.94912	0.973033	0.964899	1.27921	0.966011	0.84835	0.895093	1.22656	1.24005	0.853607	0.784572	0.732686	3.19582	1.20431	0.986197	0.864961	1.30144	1.02819	0.966064	0.764569	0.876778	0.958721
cvcan37_M391.	0.766357	1.2333	1.13015	1.20773	0.653501	1.04865	1.03083	0.872301	1.03853	0.992375	0.910128	0.842995	0.976137	1.08622	1.21566	0.994201	0.973847	0.875356	0.934265	0.746207	1.16609	0.909165	0.797015	0.895323	1.21751	1.03393	0.742361	0.904169	0.952849	0.904991	1.1419	0.937393	0.88072	0.971243	1.2366	1.23121	0.971478	0.866823	0.808526	6.29154	1.11879	0.953361	0.868143	1.44255	1.14588	0.956602	0.754232	0.883634	0.974503
cvcan17_M191.	0.741883	6.4145	1.12656	1.04761	0.702359	0.960382	0.967606	0.840153	4.68474	1.02952	1.01404	0.778245	0.956928	0.928544	1.16745	0.957515	0.998229	0.855817	1.00018	0.760231	1.20076	0.949544	0.829307	0.959165	1.14448	0.874124	1.00627	0.828444	0.939951	0.870139	1.1708	0.929517	0.85879	0.974868	1.19315	1.17344	0.904233	0.840366	0.702989	1.10545	1.16631	0.830818	0.782195	1.452	1.12339	0.888041	0.857216	0.826345	0.844056
cvcan31_M331.	0.720257	4.09958	1.15103	1.17123	0.771912	0.901402	0.964449	0.972962	1.03527	1.02471	0.861448	0.864938	0.789377	0.916295	1.22655	1.00083	0.972194	0.975751	1.00607	0.699191	1.16001	0.932548	0.813436	0.891496	1.19394	0.952378	0.802113	0.889398	0.932631	0.97334	1.13992	0.953777	0.821245	1.02494	1.2016	1.20104	0.936577	0.798097	1.01248	5.5491	1.09843	0.855647	0.870628	1.34096	1.09764	0.947565	0.78926	0.889595	1.0443
cvcan39_M411.	0.752728	4.08603	1.14253	1.11271	0.824059	0.94553	1.06692	0.963364	1.15725	0.915723	0.948305	0.854225	0.984475	0.93551	1.06139	1.17364	0.888883	0.906507	0.926847	0.708379	1.14273	0.936731	0.816006	0.935118	1.18318	1.04586	0.806308	0.839391	0.91525	0.911634	1.13609	0.983062	0.86703	0.968078	1.07244	1.25756	0.926229	0.81158	0.998664	9.68385	1.04225	0.892508	0.86992	1.47765	1.06562	0.985539	0.823288	0.915857	0.934882
CPARA32_S751.	0.6805	1.37217	1.11052	1.06894	0.955403	0.969385	1.17072	0.932953	1.0249	1.07004	0.852262	0.749869	0.94124	1.00091	1.27048	1.19782	0.940666	0.965869	0.944421	0.670757	1.29946	0.867354	0.83624	0.906482	1.10748	1.00998	0.834869	0.869738	0.90807	1.02481	1.24632	0.987112	0.820663	0.924106	1.28905	1.2589	0.941358	0.82616	0.717313	0.985699	1.18046	0.994098	0.838566	1.39158	1.04266	1.05238	0.738728	0.828762	0.872167
CG16N_S15_L002M.	0.69032	3.31799	1.03202	0.942258	1.19638	0.942371	1.04607	0.798875	7.08918	1.21658	0.899971	0.986071	0.929987	0.930033	1.21418	1.34796	1.31391	1.10036	0.845593	0.904248	0.99201	0.935162	0.859437	0.852031	0.780145	0.949934	0.787653	0.837689	0.903515	1.0556	1.06441	1.04834	0.901347	0.93485	1.0148	1.03031	0.930644	0.983299	0.658852	1.02826	1.00559	0.86969	0.840614	1.01504	1.0253	0.848743	0.780069	0.769316	0.870122
SCG5N_S1_L002M.	0.579433	1.28257	1.01942	1.06192	1.3946	0.932191	1.05071	0.694687	1.1749	1.24294	0.915977	1.05315	1.00596	1.0313	1.33486	1.30261	1.46778	1.22938	0.898478	0.814928	1.00278	0.89026	0.849765	0.776561	0.720485	0.891787	0.664881	0.78632	0.90177	1.06988	1.06216	1.15251	0.85573	0.94511	0.94304	0.96047	0.881946	0.985561	0.664945	4.52232	0.952016	0.760622	0.819107	1.08435	1.07533	0.890716	0.811096	0.742555	0.850343
cvcan8_M451.	0.58408	3.43328	0.754567	0.701469	1.18496	1.0459	1.26709	0.524739	5.09392	1.23578	0.769826	0.953102	1.41043	0.455947	1.56838	1.84273	0.879258	0.66113	1.09706	0.508811	0.92767	0.816576	0.72702	0.632261	1.47138	1.12554	0.848531	0.824748	0.899344	0.758032	1.56764	1.11879	0.924202	1.46874	1.72248	1.00496	0.969757	0.768334	0.650965	0.678474	0.964049	0.620456	0.770187	1.51748	0.964565	1.07863	0.663378	0.667413	0.778029
CG15N_S7_L002M.	0.631141	3.24402	1.08069	0.959633	1.42561	0.949404	0.99776	0.818902	7.09158	1.22938	0.869083	0.933045	1.01395	0.936223	1.20409	1.40333	1.23226	1.13265	0.917234	0.936503	1.00255	0.891757	0.821204	0.797792	0.812426	0.978988	0.865049	0.837989	0.894717	1.01654	1.01711	1.19215	0.840593	0.887127	1.02417	1.10485	0.898205	0.953286	0.682041	1.14131	0.970335	0.797531	0.838037	1.02609	1.00816	0.867608	0.787951	0.818899	0.888359
cvcan41_M431.	0.829388	4.98851	0.972745	0.803835	0.918386	0.991165	1.36237	0.844348	2.61087	0.969872	0.747835	0.871901	1.48145	0.513147	1.44599	1.69517	0.96403	0.674083	0.841894	0.403401	1.07015	0.789918	0.884485	0.65232	1.88699	0.923858	1.30839	0.807751	0.89374	0.825335	1.41682	0.908653	1.14747	1.35364	1.76531	1.19149	1.03361	0.681113	0.724881	0.805289	0.990161	0.678427	0.767761	1.42657	0.98497	1.3013	0.76837	0.758653	0.939612
cvcan9_M461.	0.821002	1.13961	1.03961	1.18454	0.674493	1.04837	0.93652	0.864076	1.13031	0.930293	1.04418	0.817001	0.89507	0.860476	1.05642	0.824015	0.832789	0.851216	0.967863	0.887324	1.22475	1.0183	0.913466	0.897793	1.23799	1.00476	0.706056	0.784584	0.872157	0.916535	1.18479	0.898478	0.898263	1.17166	1.22029	1.17374	1.00111	0.856706	0.805072	3.50544	1.07199	1.03589	0.93266	1.20356	1.08938	0.946459	0.827745	0.867671	0.938101
cvcan7_M441.	0.439548	4.84945	0.875689	0.573944	1.576	0.879304	1.49156	0.487269	1.06097	1.10584	0.61895	1.14526	1.3245	0.744815	2.17791	2.02951	1.90911	0.548379	0.891	0.579831	0.90494	0.752605	0.570421	0.667283	1.33816	1.34608	0.986759	0.689833	0.783153	0.745112	1.56365	1.02742	0.772081	1.49697	1.3513	0.866799	0.637485	0.600002	0.931459	3.16992	1.04751	0.775002	0.689008	1.55891	0.747453	1.48139	0.503352	0.447968	0.881083
[truncated: 1 more columns]

## Sheet: TableS9-cnvpytor
Table S9. Genomic regions showing CNVs based on 100bp bins using CNVpytor.
		Ap	1	0.5	<=0.25	0.25	0.047	0.016	0.5	0.38	0.25	0.25	0.25	0.25	0.5	0.12	0.5	0.25	0.5	0.5	0.25	0.5	0.5	0.5	0.12	0.5	0.5	0.38	0.25	1	0.25	0.25	0.25	<0.25	0.25	0.5	0.25	0.5	0.5	0.25	0.12	0.25	0.25	0.5	0.5	0.5	0.5	< 0.25	0.25
		Cs	0.5	0.25	0.5	1	0.5	0.75	1	1.5	0.5	0.5	1	0.5	0.5	0.5	0.5	0.5	0.5	0.5	0.5	0.5	0.5	0.5	0.5	0.5	1	1.5	0.5	6	0.5	0.5	0.5	<0.25	0.5	0.015	0.5	0.5	0.5	0.25	0.5	0.5	0.25	1	0.5	0.5	0.5	0.5	0.12
		Fl	128	32	<=1	32	2	1	128	0.5	0.5	0.25	32	4	0.12	0.5	0.5	32	0.5	0.25	1	0.5	0.5	0.5	4	32	16	3	128	0.75	128	16	0.38	<1	64	32	32	32	0.5	0.25	4	0.5	0.5	32	0.5	32	< 0.5	1	0.25
		Fc	0.12	0.06	<=1	<=0.06	0.047	0.016	<=0.06	0.094	0.064	0.012	0.06	0.06	1	0.06	0.06	0.06	0.06	0.06	<=0.06	0.12	0.06	0.5	0.06	0.06	0.12	0.125	<=0.06	0.023	<=0.06	<=0.06	0.016	<1	0.06	0.06	0.06	0.06	0.06	0.06	0.06	0.12	0.12	≤1	0.12	0.12	<1	< 1	0.06
		It	0.5	0.25	NA	0.5	NA	NA	0.5	NA	0.064	0.125	0.5	0.12	0.06	0.12	0.06	0.25	0.06	0.06	0.12	0.12	0.06	0.06	0.03	0.25	0.5	NA	0.25	0.064	0.25	0.25	NA	NA	0.5	0.5	0.25	0.5	0.06	0.03	0.03	0.06	0.06	NA	0.03	0.25	NA	NA	0.06
		Pos	0.5	0.5	NA	0.5	NA	NA	1	0.032	0.012	0.032	0.5	0.06	0.03	0.06	0.03	0.25	0.03	0.015	0.12	0.06	0.06	0.03	0.06	0.25	0.5	0.19	NA	0.047	0.5	0.25	NA	NA	0.5	0.5	0.25	0.5	0.06	0.015	0.06	0.03	0.015	NA	0.015	0.25	NA	NA	0.015
		Vo	2	0.5	<=0.12	0.5	0.064	0.047	1	0.032	0.008	0.008	1	0.06	0.008	0.015	0.008	0.5	0.008	0.008	0.06	0.015	0.015	0.008	0.06	0.5	0.25	0.125	0.5	0.064	0.5	0.25	0.002	<0.12	1	0.5	0.5	1	0.015	0.008	0.06	0.015	0.015	0.5	0.015	1	< 0.12	< 0.12	0.008
		And	0.5	0.5	NA	1	NA	NA	1	NA	1	0.5	1	2	0.5	1	1	0.5	1	1	1	1	1	0.5	0.5	0.5	1	NA	0.5	NA	0.5	1	NA	NA	1	1	1	1	1	1	0.5	1	2	NA	1	1	NA	NA	1
		Mica	2	1	0.5	0.5	NA	NA	1	NA	NA	NA	1	4	0.5	2	1	0.5	1	1	0.5	1	1	1	0.5	0.5	0.5	NA	0.25	NA	0.5	0.5	NA	<0.12	1	1	1	1	1	0.5	0.5	1	1	0.5	2	1	2	0.5	0.5
TYPE	REGION	SIZE	CG15N_S7.100	CG16N_S15.100	CPARA12_S21.100	CPARA16_S31.100	CPARA17_S41.100	CPARA18_S51.100	CPARA19_S61.100	CPARA1_S11.100	CPARA20_S71.100	CPARA21_S81.100	CPARA22_S91.100	CPARA23_M201.100	CPARA24_M211.100	CPARA25_MG.100	CPARA26_S691.100	CPARA27_S701.100	CPARA28_S711.100	CPARA29_S721.100	CPARA2_S21.100	CPARA30_S731.100	CPARA31_S741.100	CPARA32_S751.100	CPARA33_S761.100	CPARA34_S771.100	CPARA3_S31.100	CPARA4_S41.100	CPARA5_S51.100	CPARA6_S61.100	CPARA7_S71.100	CPARA8_S81.100	CPARA9_S91.100	CPCORTH8.100	cvcan10_M471.100	cvcan17_S191.100	cvcan19_S211.100	cvcan26_S281.100	cvcan29_S311.100	cvcan31_S331.100	cvcan33_S351.100	cvcan37_S391.100	cvcan39_S411.100	cvcan41_S431.100	cvcan52_M231.100	cvcan55_M261.100	cvcan61_M321.100	cvcan62_M331.100	cvcan6_M431.100
duplication	NW_023503284.1:806001-884500	78500	2.22544	2.13558	3.4075	3.0493	3.47106	4.38045	3.56025	3.14773	3.25875	3.19043	3.26024	3.43823	3.27817	3.17126	2.60848	2.72091	2.70587	2.61063	3.72294	2.68868	2.61929	2.73534	2.92064	2.79913	3.17098	2.89537	3.43918	3.68277	2.94237	3.24947	2.81553	2.82655	3.39787	2.61125	2.86901	3.30177	3.03622	2.5238	2.61048	2.55977	2.52607	3.11864	2.89263	4.38534	3.68433	3.15179	3.56412
duplication	NW_023503284.1:847201-869200	22000	2.27169	2.14778	3.03729	2.73096	2.96316	3.85776	3.21827	2.84043	2.82744	2.74855	3.06173	3.13771	3.15738	2.88892	2.48728	2.63087	2.6267	2.49717	3.30276	2.59657	2.47799	2.59042	2.7916	2.65064	2.85604	2.65346	3.01104	3.4015	2.7526	3.05223	2.80044	2.59251	3.3047	2.47325	2.71742	3.11768	2.86842	2.47478	2.4979	2.50259	2.42172	3.09179	2.99022	4.1847	3.59292	3.02881	3.29806
duplication	NW_023503284.1:861601-871300	9700	2.49004	2.3631	3.14126	2.83821	3.09293	3.91598	3.42708	3.15378	3.03349	2.82796	3.26086	3.31103	3.2183	3.10816	2.93696	3.1887	3.14455	3.09118	3.44177	3.12621	3.04921	3.1811	3.32848	3.23284	3.03774	2.83566	3.227	3.68151	2.98623	3.16297	2.9729	2.79015	4.01472	3.09163	2.9793	3.4075	3.24292	3.07101	2.86508	3.03702	2.91593	3.19324	3.22741	4.62447	3.97315	3.42112	3.82155
duplication	NW_023503283.1:127301-252600	125300	2.36219	2.31189	2.56838	2.3936	2.58927	3.18308	2.61482	2.43944	2.40507	2.44841	2.51996	2.5483	2.56049	2.44188	2.44634	2.53541	2.48969	2.4727	2.6925	2.45336	2.41258	2.52601	2.63351	2.58579	2.4491	2.3709	2.51546	2.77436	2.36385	2.47635	2.28754	2.38637	2.93451	2.46451	2.63665	2.72312	2.53482	2.38037	2.47707	2.32323	2.38752	2.88828	2.65157	3.33993	3.14352	2.75632	2.8723
duplication	NW_023503283.1:176601-308300	131700	2.27889	2.24161	2.39331	2.25582	2.39454	2.82633	2.44362	2.30595	2.27198	2.31188	2.33698	2.37069	2.38733	2.3627	2.41691	2.44822	2.42946	2.42688	2.51311	2.40088	2.35151	2.39397	2.50843	2.51765	2.28883	2.23967	2.37211	2.54315	2.22773	2.28407	2.13995	2.29608	2.70455	2.34546	2.40221	2.56071	2.39626	2.31131	2.3017	2.24171	2.32024	2.97746	2.48751	2.9408	2.94937	2.60697	2.68719
duplication	NW_023503283.1:219201-240200	21000	2.46439	2.37277	2.52631	2.41316	2.55669	2.90005	2.55603	2.3938	2.41486	2.44379	2.52991	2.49056	2.57151	2.51099	2.64146	2.71191	2.70899	2.68116	2.70191	2.62066	2.56948	2.76932	2.88347	2.76142	2.40637	2.4429	2.49575	2.67757	2.4527	2.40431	2.30853	2.41698	3.09325	2.6363	2.36822	2.69146	2.52424	2.58816	2.49051	2.5065	2.5756	2.48778	2.65733	3.07061	3.00355	2.7316	2.83837
duplication	NW_023503283.1:227301-240300	13000	2.46622	2.33916	2.50423	2.453	2.54548	2.92747	2.5334	2.42357	2.40308	2.49204	2.50422	2.42069	2.62425	2.49926	2.58433	2.62735	2.65885	2.62656	2.66233	2.53425	2.50692	2.6299	2.78943	2.74855	2.4187	2.46504	2.52346	2.70073	2.4314	2.39611	2.36582	2.41029	2.96973	2.48955	2.4099	2.68205	2.44819	2.51218	2.31271	2.42296	2.48995	2.60673	2.65475	2.99658	3.05971	2.72482	2.8222
duplication	NW_023503283.1:277301-295300	18000	2.27982	2.20459	2.39623	2.30883	2.37171	2.67627	2.32278	2.25929	2.26864	2.30344	2.2675	2.36769	2.38341	2.33147	2.42577	2.28991	2.3221	2.31148	2.5162	2.31496	2.28035	2.2232	2.2729	2.3749	2.29272	2.3453	2.32044	2.43056	2.15086	2.22268	2.16549	2.30725	2.45602	2.17484	2.34064	2.33465	2.18129	2.13323	2.08502	2.0897	2.18947	3.5638	2.49262	2.85374	2.98496	2.58496	2.54894
duplication	NW_023503283.1:259701-347000	87300	2.18917	2.17994	2.42613	2.24094	2.37803	2.68158	2.3968	2.31142	2.35304	2.35625	2.31868	2.3911	2.30977	2.38448	2.37105	2.32643	2.31887	2.35354	2.45509	2.32032	2.2419	2.27321	2.34006	2.36903	2.26023	2.19429	2.3801	2.43675	2.15818	2.25946	2.17033	2.33675	2.44703	2.21499	2.32803	2.41029	2.2587	2.22769	2.13475	2.11704	2.2601	3.15165	2.3626	2.73126	2.81025	2.54884	2.56864
deletion	NW_023503283.1:1104601-1300600	196000	1.92455	1.90307	1.87829	1.83682	1.91272	1.70067	1.74604	1.82059	1.82911	1.92689	1.75788	1.74893	1.86184	1.98513	1.95777	1.92726	1.95013	1.98205	1.69348	1.90823	1.94053	1.95501	1.87415	1.87159	1.79642	1.88444	1.78935	1.7343	1.83264	1.77607	1.97439	1.81632	1.71671	1.83667	1.7509	1.74673	1.73898	1.88518	1.78339	1.88799	1.87738	1.84305	1.85074	1.69279	1.64527	1.72392	1.68139
deletion	NW_023503283.1:1114901-1128000	13100	1.75696	1.7428	1.71988	1.67432	1.82296	1.52281	1.61387	1.67839	1.70746	1.7549	1.69014	1.61769	1.65075	1.91865	1.77101	1.76845	1.78336	1.76401	1.5807	1.7311	1.81422	1.7359	1.668	1.6932	1.64533	1.75282	1.68365	1.51514	1.71832	1.64735	1.8873	1.69166	1.51327	1.69475	1.43948	1.64117	1.69723	1.76223	1.81017	1.70911	1.69157	1.29858	1.6102	1.42383	1.28336	1.49112	1.56934
duplication	NW_023503283.1:1341001-1366100	25100	2.02784	2.01436	2.05905	2.0764	2.19062	2.05387	1.91417	1.96849	2.04047	2.13749	2.03136	2.04004	2.05142	2.20821	2.1722	2.15663	2.19352	2.17399	1.9459	2.12735	2.11841	2.0653	2.0951	2.12705	2.00697	2.05525	2.00056	2.01702	2.04879	1.87802	2.19859	2.03098	2.00975	2.0762	2.31275	2.03229	2.02431	2.03908	1.99181	2.01637	2.06951	2.6814	2.13777	2.12005	2.15977	2.04602	2.15155
duplication	NW_023503282.1:24801-46400	21600	2.12859	2.14508	3.36771	3.26224	3.28532	4.88228	3.60479	3.072	3.029	3.25407	3.90089	3.39543	4.08385	3.2772	2.4084	2.91534	2.70448	2.51259	3.76305	2.64149	2.56369	2.84389	3.05921	2.5723	3.36017	3.26769	3.48635	3.80382	3.70198	3.81402	3.19144	3.18669	4.10288	2.9626	4.21138	6.0785	3.77657	2.77325	2.55873	2.83025	2.74704	4.49661	3.45878	4.27393	4.88173	4.05867	4.33682
duplication	NW_023503282.1:22301-38700	16400	2.01069	2.03794	3.20695	3.27946	3.30687	4.76154	3.5567	2.87781	2.8277	3.18683	3.84133	3.2515	3.9719	3.09829	2.32318	2.81749	2.64598	2.42439	3.65383	2.5499	2.4852	2.77186	2.98017	2.46563	3.36053	3.38214	3.36102	3.85267	3.57462	3.77707	3.16933	3.17458	3.99447	2.81697	4.2481	5.88559	3.72355	2.66792	2.6383	2.73625	2.56241	4.32265	3.3288	3.89436	4.56153	3.85402	4.11048
duplication	NW_023503282.1:412501-468200	55700	1.97256	1.93581	2.27416	2.00259	2.3314	2.3244	2.02813	2.08851	2.02125	2.16672	1.96124	2.14056	2.13615	2.31658	2.25977	2.27837	2.28831	2.22901	2.04027	2.16714	2.17917	2.25101	2.23968	2.19811	1.96271	2.1525	2.02702	2.01141	2.00624	1.94588	2.31604	2.06781	2.28354	2.14819	2.16459	3.37436	2.10413	2.12729	1.98512	2.14881	2.16536	1.95057	2.3135	2.2515	2.47608	2.30673	2.32586
duplication	NW_023503282.1:457601-463400	5800	2.13235	1.99934	2.20013	1.93622	2.22532	2.26179	1.98023	2.13252	2.11755	2.24942	1.78603	2.09665	2.06702	2.32185	2.57858	2.63757	2.57977	2.54993	2.05015	2.43859	2.43981	2.49272	2.52586	2.4177	1.84271	2.11443	2.01538	1.99217	1.98543	1.97887	2.35229	2.13871	2.45101	2.49346	2.26286	3.54007	2.11919	2.20542	2.01064	2.34984	2.46273	1.89445	2.41315	2.31083	2.70843	2.46378	2.43412
deletion	NW_023503281.1:1533001-1567500	34500	2.06333	2.08266	1.49555	1.95484	1.58144	1.43033	1.76134	1.74092	1.85314	1.6683	1.82047	1.81842	1.89284	1.86935	1.79278	1.83964	1.68316	1.67987	1.72042	1.88741	1.89715	1.67491	1.70526	1.81933	1.87225	1.7144	1.81287	1.68385	1.93876	1.8712	1.82601	1.80387	1.61444	1.86447	2.04822	1.6313	1.74502	2.02234	1.75986	1.93293	1.90047	2.21271	1.60629	1.73308	1.84955	1.81062	1.42764
deletion	NW_023503281.1:1654801-1868900	214100	1.9551	1.97239	2.35549	2.54551	2.2996	2.0812	2.44186	2.29982	2.89298	2.38787	2.38955	2.47912	2.40191	2.59819	1.79443	1.65216	1.70507	1.67906	2.4941	1.787	1.74941	1.68247	1.59395	1.65376	2.47623	2.1196	2.50526	2.22591	2.33447	2.42738	2.10819	2.03422	1.55096	1.76461	1.74291	1.73708	1.87857	1.82619	1.73531	1.76062	1.79813	1.64561	1.48676	1.92444	1.71577	1.83061	1.63281
deletion	NW_023503281.1:1701401-1730400	29000	1.6551	1.6846	1.4436	1.66458	1.35669	1.3362	1.53386	1.61215	1.5892	1.46303	1.58457	1.51413	1.56413	1.69903	1.46872	1.35571	1.42071	1.40237	1.46534	1.46476	1.49289	1.38964	1.3027	1.33736	1.55689	1.42738	1.51985	1.46984	1.6497	1.65536	1.60162	1.55673	1.34227	1.54357	1.48585	1.42544	1.4964	1.58286	1.65814	1.51203	1.5885	1.61002	1.36669	1.42314	1.41145	1.46895	1.28361
deletion	NW_023503281.1:1713401-1747700	34300	1.85414	1.85105	1.49057	1.68358	1.40538	1.35025	1.58922	1.62497	1.5872	1.51159	1.66104	1.5612	1.63393	1.7098	1.65319	1.56601	1.60681	1.57734	1.51293	1.67361	1.67588	1.58904	1.48939	1.50288	1.63937	1.54475	1.60207	1.45734	1.71706	1.72494	1.68665	1.65573	1.52747	1.75438	1.65869	1.51419	1.63546	1.76775	1.7686	1.72616	1.76597	1.80366	1.45452	1.53112	1.49237	1.57119	1.3426
duplication	NW_023503281.1:2541201-2566100	24900	2.03575	2.01985	1.93128	1.92627	1.91043	1.92579	1.95162	1.94015	1.91078	1.92078	1.97565	1.95103	1.90675	2.05679	2.13601	2.00615	2.07199	2.08681	1.9225	2.06152	2.06045	2.00179	1.99801	2.08305	1.96507	1.92116	2.00352	1.9347	1.92337	1.95011	1.82449	1.99993	1.94214	1.96452	1.97194	1.94031	1.99212	1.95726	1.9911	1.90457	1.98019	2.57767	1.9335	1.96225	1.95977	1.94655	1.90327
duplication	NW_023503281.1:2910001-2949600	39600	2.33413	2.2759	3.20553	2.81114	2.88621	4.07901	3.2374	2.86441	2.85485	2.87294	3.05523	3.18834	3.04644	2.93341	2.33787	2.4846	2.43048	2.42521	3.37047	2.38223	2.39582	2.48992	2.71703	2.57597	2.83648	2.74298	3.04839	3.42806	2.90069	3.05426	2.43268	2.54356	3.42366	2.5914	2.9012	3.21119	2.91312	2.45903	2.64947	2.4534	2.42658	3.75887	2.84685	4.12485	3.41911	2.9202	3.36928
duplication	NW_023503281.1:2923701-2935300	11600	2.41348	2.43604	3.21197	2.86255	2.97954	4.1837	3.44381	2.9152	2.98334	2.88531	3.06723	3.25969	3.12557	2.9637	2.41856	2.62097	2.46083	2.43648	3.47144	2.44517	2.42534	2.46426	2.81083	2.63932	2.8423	2.86001	3.35372	3.52493	2.98983	3.29909	2.5045	2.69842	3.46172	2.6708	2.89963	3.25203	2.88392	2.44705	2.47907	2.42898	2.42553	4.3704	2.90553	4.42353	3.71318	3.08718	3.41561
duplication	NW_023503281.1:2930801-2941600	10800	2.15429	2.15099	3.24199	2.86533	2.72023	4.10037	3.13237	2.81938	2.81164	2.74996	3.03333	3.07231	3.07731	2.92085	2.12889	2.28705	2.20265	2.2338	3.23685	2.15506	2.16391	2.22854	2.54288	2.29088	2.74946	2.65637	2.96302	3.27286	2.71659	3.06846	2.19548	2.45416	3.05134	2.29731	2.57738	3.07742	2.67125	2.20166	2.38029	2.18785	2.16757	3.86013	2.73487	3.97999	3.38261	2.83057	3.14297
duplication	NW_023503280.1:314501-327100	12600	2.1802	2.06351	2.48791	2.4264	2.5359	2.88901	2.43248	2.29792	2.33398	2.52722	2.33572	2.51485	2.45323	2.37896	2.39465	2.28424	2.29785	2.35139	2.53861	2.30024	2.21939	2.2509	2.28458	2.32253	2.4483	2.29214	2.33094	2.64036	2.23246	2.60304	2.10794	2.38615	2.44426	2.20932	2.37229	2.41989	2.36522	2.05755	2.11486	2.1695	2.15778	3.21443	2.3784	2.65809	2.66864	2.44558	2.47922
duplication	NW_023503280.1:314701-395200	80500	2.10555	2.07619	2.17071	2.05425	2.17525	2.35929	2.1989	2.09972	2.06784	2.09459	2.11545	2.17135	2.10799	2.18393	2.18342	2.17398	2.16631	2.16875	2.20752	2.16938	2.12988	2.18293	2.18418	2.20552	2.11782	2.08276	2.15814	2.28655	2.0812	2.21589	1.85223	2.14202	2.32248	2.15274	2.5419	2.29075	2.24633	2.03576	2.08001	2.07403	2.0764	2.87421	2.14452	2.34462	2.45718	2.26864	2.37776
[truncated: 23 more rows]
[truncated: 4 more columns]
