# Supplementary figures and images for: Genomic characterization of Candida parapsilosis hospital isolates revealed the spread and persistence of a fluconazole-resistant cluster associated with increased erg11 copies
Source: Research Square preprint supplement (doi:10.21203/rs.3.rs-6270917/v1), 2025-06-02

Fig S1

(a)

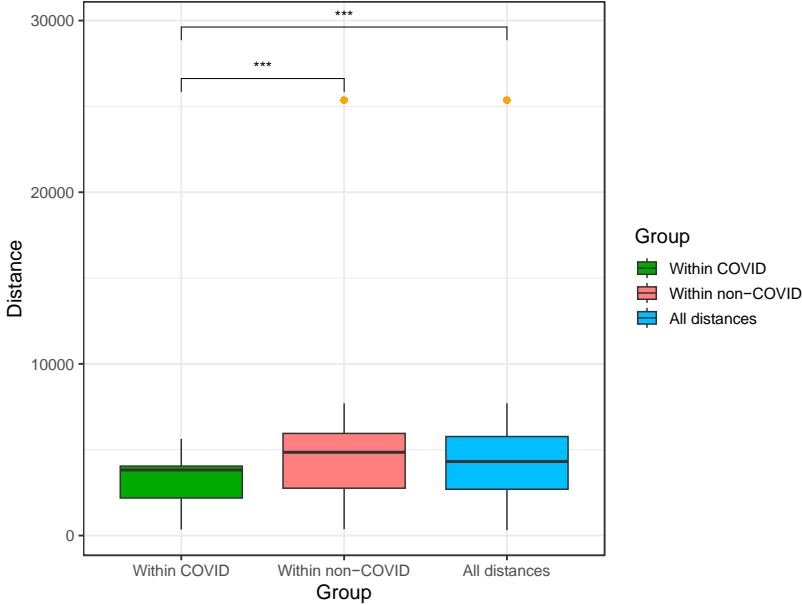

(b)

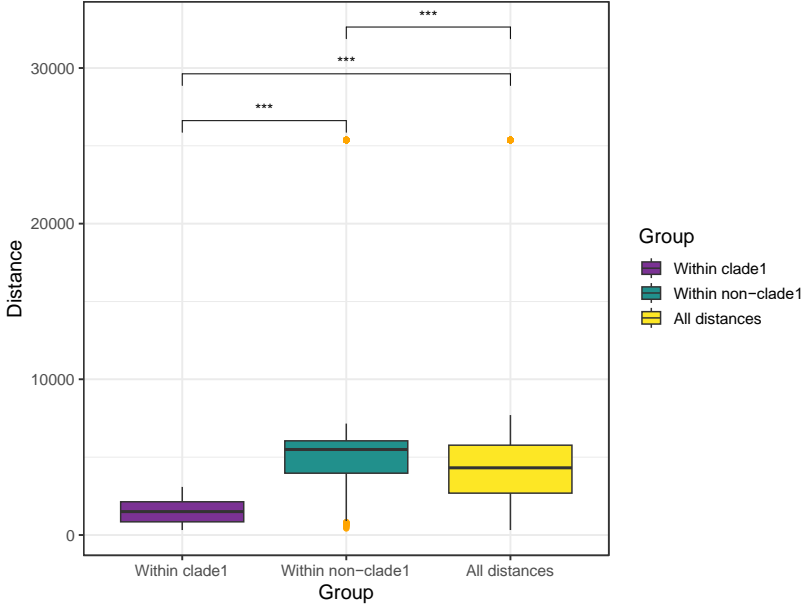

(c)

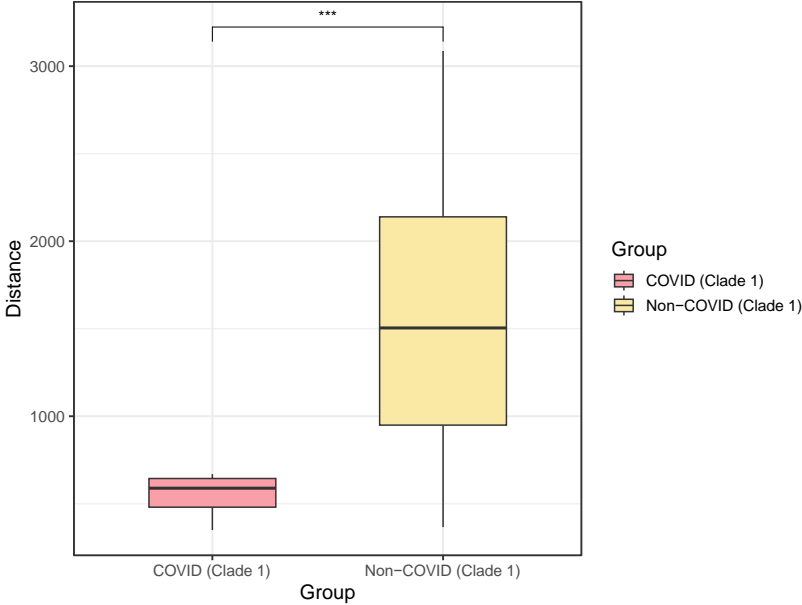

Supplement: Supplementary file 1 [file 53d74e91dfe3d1932f61b0f3.pdf]
